# Supplementary material for: Transcriptomic profiling of tissue environments critical for post-embryonic patterning and morphogenesis of zebrafish skin
Source: bioRxiv preprint, doi:10.1101/2021.05.12.443782, version 4 (2023-06-26)
Supplement: Aman_Saunders_Supplementary_File_2 [file 443782_file04.xlsx]

## Sheet: Table_2
Cell Type	ENSEMBL ID	Gene Symbol	Specificity	marker_score	mean_expression	fraction_expressing	pseudo_R2	marker_test_p_value	marker_test_q_value
Basal Cell	ENSDARG00000040295	apoeb	0.363783	0.148753	1.19847	0.408905	0.248197	0	0
Basal Cell	ENSDARG00000027088	ptgdsb.1	0.353863	0.159315	2.20139	0.450217	0.272045	0	0
Basal Cell	ENSDARG00000074132	scpp7	0.31491	0.11256	6.39815	0.357435	0.116583	0	0
Basal Cell	ENSDARG00000054616	cldni	0.304747	0.196138	1.34676	0.643608	0.439779	0	0
Basal Cell	ENSDARG00000022615	si:ch211-241e1.3	0.266397	0.145648	1.14323	0.546732	0.323754	0	0
Basal Cell	ENSDARG00000056248	si:dkey-183i3.5	0.263818	0.111287	4.73271	0.421832	0.147476	0	0
Basal Cell	ENSDARG00000069415	col17a1a	0.257841	0.15773	2.01482	0.611731	0.353674	0	0
Basal Cell	ENSDARG00000055192	zgc:136930	0.254807	0.112099	3.05815	0.439939	0.169327	0	0
Basal Cell	ENSDARG00000068288	lamc2	0.250393	0.117828	0.854503	0.470572	0.292929	0	0
Basal Cell	ENSDARG00000027867	paplna	0.245157	0.148966	1.38288	0.607636	0.375106	0	0
Basal Cell	ENSDARG00000101199	rbp4	0.231477	0.163236	4.56591	0.705195	0.320523	0	0
Basal Cell	ENSDARG00000028507	itgb4	0.231197	0.227224	12.1339	0.982817	0.719457	0	0
Basal Cell	ENSDARG00000069946	itga6b	0.229579	0.215292	7.48973	0.937771	0.594707	0	0
Basal Cell	ENSDARG00000043806	postna	0.229146	0.129467	4.28432	0.564999	0.262845	0	0
Basal Cell	ENSDARG00000017953	tp73	0.223042	0.115004	0.947063	0.515617	0.289046	0	0
Basal Cell	ENSDARG00000079011	col17a1b	0.218599	0.152294	1.78826	0.696684	0.431745	0	0
Basal Cell	ENSDARG00000036558	col18a1a	0.210621	0.182784	4.60378	0.867834	0.534038	0	0
Basal Cell	ENSDARG00000019353	sparc	0.201553	0.16136	4.69146	0.800586	0.359206	0	0
Basal Cell	ENSDARG00000103666	dapk2b	0.20007	0.146286	1.71793	0.731171	0.382832	0	0
Basal Cell	ENSDARG00000044356	tp63	0.194023	0.167562	3.43315	0.863618	0.417876	0	0
Basal Cell	ENSDARG00000100518	CR387919.1	0.186899	0.12083	1.31486	0.646499	0.298508	0	0
Basal Cell	ENSDARG00000035809	col1a1b	0.182671	0.17211	15.7455	0.942187	0.414196	0	0
Basal Cell	ENSDARG00000063295	myh9a	0.182494	0.122298	1.4	0.670146	0.287722	0	0
Basal Cell	ENSDARG00000020007	col1a2	0.169171	0.154011	9.62762	0.91039	0.363201	0	0
Basal Cell	ENSDARG00000074201	flna	0.164039	0.120198	1.77875	0.732736	0.246422	0	0
Basal Cell	ENSDARG00000012405	col1a1a	0.162316	0.140374	7.85454	0.864823	0.31347	0	0
Basal Cell	ENSDARG00000058115	fgfr2	0.157549	0.134728	2.97573	0.855147	0.344959	0	0
Basal Cell	ENSDARG00000079388	agrn	0.133226	0.118314	3.22809	0.888068	0.401978	0	0
Basal Cell	ENSDARG00000012914	arhgef4	0.124397	0.111207	3.4937	0.89397	0.261564	0	0
Basal Cell	ENSDARG00000021987	plecb	0.118406	0.112492	6.59453	0.950056	0.272006	0	0
Dermal mesenchyme	ENSDARG00000045979	zgc:153704	0.357022	0.0739555	1.02683	0.207146	0.0971747	0	0
Dermal mesenchyme	ENSDARG00000007275	si:ch211-251b21.1	0.252167	0.0999659	1.37524	0.396427	0.168983	0	0
Dermal mesenchyme	ENSDARG00000078163	hpse2	0.238967	0.0720262	1.24125	0.301406	0.100151	0	0
Dermal mesenchyme	ENSDARG00000071095	abi3bpb	0.233227	0.0876262	1.78023	0.375713	0.114051	0	0
Dermal mesenchyme	ENSDARG00000095268	si:dkey-261h17.1	0.221912	0.091683	1.69387	0.413151	0.125037	0	0
Dermal mesenchyme	ENSDARG00000089913	cacna1g	0.188613	0.118358	2.48964	0.627518	0.212077	0	0
Dermal mesenchyme	ENSDARG00000078322	col12a1a	0.176362	0.131719	4.5918	0.746864	0.200092	0	0
Dermal mesenchyme	ENSDARG00000097827	lrp1aa	0.167795	0.0867675	1.13066	0.517104	0.141339	0	0
Dermal mesenchyme	ENSDARG00000061328	cdon	0.167072	0.0785195	1.25497	0.469973	0.119455	0	0
Dermal mesenchyme	ENSDARG00000060753	pear1	0.164764	0.0752114	1.22058	0.45648	0.121443	0	0
Dermal mesenchyme	ENSDARG00000078026	zcchc24	0.161992	0.097035	2.23247	0.599012	0.137477	0	0
Dermal mesenchyme	ENSDARG00000019601	col12a1b	0.158005	0.116627	5.21686	0.738122	0.18609	0	0
Dermal mesenchyme	ENSDARG00000077139	col6a3	0.156115	0.1082	2.33268	0.693082	0.195307	0	0
Dermal mesenchyme	ENSDARG00000089066	nhsl2	0.156057	0.0826256	1.74353	0.529456	0.134258	0	0
Dermal mesenchyme	ENSDARG00000015176	ror1	0.155413	0.0698502	1.35411	0.449449	0.0953019	0	0
Dermal mesenchyme	ENSDARG00000061436	col6a2	0.152181	0.0773054	1.35018	0.507982	0.114248	0	0
Dermal mesenchyme	ENSDARG00000104267	postnb	0.148294	0.0948611	2.61865	0.639681	0.098257	0	0
Dermal mesenchyme	ENSDARG00000074908	col6a1	0.146639	0.0827947	1.67223	0.564614	0.125166	0	0
Dermal mesenchyme	ENSDARG00000059933	plpp3	0.146234	0.07245	1.72571	0.495439	0.0963294	0	0
Dermal mesenchyme	ENSDARG00000103057	zfhx3	0.145969	0.0910708	2.01959	0.623907	0.153303	0	0
Dermal mesenchyme	ENSDARG00000074335	boc	0.140287	0.0683304	1.17207	0.487077	0.0972271	0	0
Dermal mesenchyme	ENSDARG00000045064	ablim1b	0.139462	0.0742367	1.41348	0.532307	0.0961254	0	0
Dermal mesenchyme	ENSDARG00000052131	gli3	0.136521	0.0735791	1.28803	0.538959	0.10165	0	0
Dermal mesenchyme	ENSDARG00000031678	col5a2a	0.135607	0.0843486	1.83792	0.622007	0.086808	0	0
Dermal mesenchyme	ENSDARG00000039576	fstl1b	0.129932	0.0760281	1.62183	0.585139	0.101298	0	0
Dermal mesenchyme	ENSDARG00000056427	auts2a	0.120153	0.0827508	2.76925	0.688712	0.136553	0	0
Dermal mesenchyme	ENSDARG00000099979	tgfbr3	0.115164	0.0858587	3.39339	0.745534	0.0966989	0	0
Dermal mesenchyme	ENSDARG00000012593	col5a1	0.110263	0.0979835	4.39507	0.888635	0.121199	0	0
Endothelial Cell	ENSDARG00000017321	kdr	0.756367	0.301032	0.737064	0.397997	0.285865	0	0
Endothelial Cell	ENSDARG00000075833	lyve1a	0.748352	0.149858	0.770789	0.20025	0.138737	5.90094e-292	4.80252e-286
Endothelial Cell	ENSDARG00000045748	stab2	0.737848	0.305667	1.19969	0.414268	0.289826	0	0
Endothelial Cell	ENSDARG00000075549	cdh5	0.72345	0.156642	0.564766	0.216521	0.143653	2.85024e-302	2.31968e-296
Endothelial Cell	ENSDARG00000100657	egfl7	0.722205	0.385056	1.33341	0.533166	0.356692	0	0
Endothelial Cell	ENSDARG00000074829	rasip1	0.688618	0.210291	0.510011	0.305382	0.200856	0	0
Endothelial Cell	ENSDARG00000088308	notchl	0.656223	0.15112	0.426948	0.230288	0.133823	1.20741e-281	9.82661e-276
Endothelial Cell	ENSDARG00000013653	adgrl4	0.649497	0.184525	0.474862	0.284105	0.186824	0	0
Endothelial Cell	ENSDARG00000102100	mrc1a	0.643964	0.245013	1.21198	0.380476	0.247459	0	0
Endothelial Cell	ENSDARG00000088801	fgd5a	0.643744	0.412512	2.17578	0.640801	0.464521	0	0
Endothelial Cell	ENSDARG00000076484	stab1	0.639554	0.382612	3.24283	0.598248	0.371505	0	0
Endothelial Cell	ENSDARG00000104453	flt4	0.624276	0.300027	1.90177	0.480601	0.291868	0	0
Endothelial Cell	ENSDARG00000076624	ptprb	0.60685	0.149624	0.542507	0.246558	0.145049	3.34857e-305	2.72525e-299
Endothelial Cell	ENSDARG00000004105	tie1	0.604666	0.170275	0.494643	0.281602	0.16304	0	0
Endothelial Cell	ENSDARG00000077577	ntsr1	0.600732	0.151123	0.505352	0.251564	0.147892	0	2.91731e-305
Endothelial Cell	ENSDARG00000014522	cdh6	0.586777	0.328272	2.20157	0.559449	0.342665	0	0
Endothelial Cell	ENSDARG00000037553	il1rapl2	0.550164	0.20657	1.96079	0.375469	0.192616	0	0
Endothelial Cell	ENSDARG00000031891	tbx1	0.533358	0.191582	0.727676	0.359199	0.15961	0	0
Endothelial Cell	ENSDARG00000011571	calcrlb	0.524358	0.175224	0.568331	0.334168	0.177696	0	0
Endothelial Cell	ENSDARG00000078624	arhgef9b	0.511167	0.166977	0.588651	0.326658	0.185046	0	0
Endothelial Cell	ENSDARG00000054632	fli1a	0.464017	0.260756	1.21119	0.561952	0.265017	0	0
Endothelial Cell	ENSDARG00000060929	rnf220a	0.418009	0.164797	1.21915	0.394243	0.171248	0	0
Endothelial Cell	ENSDARG00000090230	tmem108	0.3931	0.164816	1.44676	0.419274	0.215627	0	0
Endothelial Cell	ENSDARG00000102125	iqsec2a	0.386673	0.190675	1.41534	0.493116	0.278843	0	0
Endothelial Cell	ENSDARG00000077677	pdgfd	0.368793	0.175396	1.05652	0.475594	0.156162	0	0
Endothelial Cell	ENSDARG00000019579	ldb2a	0.359375	0.165969	1.18651	0.461827	0.168305	0	0
Endothelial Cell	ENSDARG00000004378	yrk	0.332552	0.1669	1.01138	0.501877	0.19368	0	0
Endothelial Cell	ENSDARG00000007807	cyth3a	0.329945	0.147422	0.912762	0.446809	0.176412	0	0
Endothelial Cell	ENSDARG00000031751	npr1a	0.326169	0.168187	1.3276	0.515645	0.182511	0	0
Endothelial Cell	ENSDARG00000032435	itga9	0.224976	0.15036	2.85811	0.668335	0.15816	0	0
Goblet Cell	ENSDARG00000070480	agr2	0.376197	0.201211	3.20707	0.534854	0.315478	0	0
Goblet Cell	ENSDARG00000076830	si:dkey-65b12.6	0.351897	0.22735	3.28931	0.646071	0.400692	0	0
Goblet Cell	ENSDARG00000070331	muc5.1	0.348904	0.296171	12.0923	0.848859	0.521971	0	0
Goblet Cell	ENSDARG00000097416	si:ch73-306e8.2	0.345347	0.132843	1.10862	0.384664	0.230338	0	0
Goblet Cell	ENSDARG00000058556	muc5.2	0.336676	0.329315	45.0893	0.978137	0.710695	0	0
Goblet Cell	ENSDARG00000025866	ankdd1b	0.325613	0.215115	1.91584	0.660646	0.413406	0	0
Goblet Cell	ENSDARG00000043814	st6galnac1.1	0.316397	0.107671	0.672527	0.340304	0.193825	0	0
Goblet Cell	ENSDARG00000076952	fer1l4	0.314004	0.224161	2.19018	0.713878	0.443681	0	0
Goblet Cell	ENSDARG00000026296	zgc:112994	0.312532	0.128142	0.794291	0.410013	0.248651	0	0
Goblet Cell	ENSDARG00000019316	fer1l6	0.301983	0.0835334	0.523817	0.276616	0.154339	0	0
Goblet Cell	ENSDARG00000020981	slc35a3b	0.293419	0.0843253	0.53617	0.287389	0.140008	0	0
Goblet Cell	ENSDARG00000017429	sphkap	0.289433	0.085656	1.22113	0.295944	0.156136	0	0
Goblet Cell	ENSDARG00000070094	sytl1	0.276441	0.0843512	0.553758	0.305133	0.161322	0	0
Goblet Cell	ENSDARG00000096971	si:dkey-206p8.1	0.260346	0.0896691	0.682667	0.344423	0.172803	0	0
Goblet Cell	ENSDARG00000006112	myof	0.223934	0.142194	1.6762	0.634981	0.224255	0	0
Goblet Cell	ENSDARG00000074697	npdc1a	0.218129	0.101324	1.06082	0.464512	0.242711	0	0
Goblet Cell	ENSDARG00000013312	cadps2	0.213488	0.128255	1.49371	0.60076	0.246704	0	0
Goblet Cell	ENSDARG00000112644	CU459056.1	0.20944	0.0860056	0.960805	0.410646	0.151111	0	0
Goblet Cell	ENSDARG00000029474	camk1b	0.208154	0.153016	2.38848	0.735108	0.343571	0	0
Goblet Cell	ENSDARG00000061741	itpr3	0.178174	0.0891998	1.06812	0.500634	0.154099	0	0
Goblet Cell	ENSDARG00000029480	specc1	0.17506	0.137064	2.85204	0.782953	0.1782	0	0
Goblet Cell	ENSDARG00000056554	rap1gap	0.166722	0.112522	1.98584	0.674905	0.254355	0	0
Goblet Cell	ENSDARG00000043317	kita	0.160329	0.0810788	1.20301	0.505703	0.204953	0	0
Goblet Cell	ENSDARG00000058237	ssbp3a	0.150007	0.106849	2.30805	0.712294	0.120458	0	0
Goblet Cell	ENSDARG00000102335	ano1	0.147208	0.107188	2.54494	0.728137	0.101407	0	0
Goblet Cell	ENSDARG00000079027	chsy1	0.144959	0.102381	3.08801	0.706274	0.171076	0	0
Goblet Cell	ENSDARG00000104094	grk3	0.134209	0.0787988	1.33725	0.587136	0.127239	0	0
Goblet Cell	ENSDARG00000079097	tanc2a	0.131734	0.0958789	2.38042	0.72782	0.173145	0	0
Goblet Cell	ENSDARG00000015495	klf3	0.123485	0.0795064	1.83949	0.643853	0.0397391	1.18849e-239	9.67258e-234
Goblet Cell	ENSDARG00000019420	etnk1	0.10968	0.0845886	2.79346	0.771229	0.0576144	0	0
Goblet Cell 2	ENSDARG00000075720	il2rb	0.412052	0.0911918	0.370046	0.221311	0.0737045	3.0088e-33	2.44873e-27
Goblet Cell 2	ENSDARG00000087195	rorc	0.369793	0.109119	1.57478	0.295082	0.0894007	5.7347e-40	4.66722e-34
Goblet Cell 2	ENSDARG00000020788	sla2	0.367449	0.0993919	0.680553	0.270492	0.0720089	1.60228e-32	1.30403e-26
Goblet Cell 2	ENSDARG00000058246	cysltr1	0.287228	0.110653	0.715506	0.385246	0.117564	5.16562e-52	4.20407e-46
Goblet Cell 2	ENSDARG00000026296	zgc:112994	0.285529	0.102978	0.70517	0.360656	0.100478	1.04508e-44	8.50543e-39
Goblet Cell 2	ENSDARG00000071437	ptprc	0.267081	0.153243	1.39069	0.57377	0.143471	4.36326e-63	3.55107e-57
Goblet Cell 2	ENSDARG00000043475	tagapb	0.261613	0.081486	0.551232	0.311475	0.0874493	3.92274e-39	3.19254e-33
Goblet Cell 2	ENSDARG00000058556	muc5.2	0.261251	0.252685	32.2887	0.967213	0.308218	1.73765e-133	1.4142e-127
Goblet Cell 2	ENSDARG00000025866	ankdd1b	0.259307	0.142406	1.41914	0.54918	0.142819	8.28942e-63	6.74639e-57
Goblet Cell 2	ENSDARG00000076952	fer1l4	0.255309	0.152767	1.66683	0.598361	0.161428	9.25802e-71	7.5347e-65
Goblet Cell 2	ENSDARG00000076830	si:dkey-65b12.6	0.247371	0.139907	2.06864	0.565574	0.141469	3.12919e-62	2.54671e-56
Goblet Cell 2	ENSDARG00000070331	muc5.1	0.229989	0.17532	6.9827	0.762295	0.180595	5.9872e-79	4.87272e-73
Goblet Cell 2	ENSDARG00000029474	camk1b	0.218743	0.175712	2.55051	0.803279	0.211887	2.55724e-92	2.08123e-86
Goblet Cell 2	ENSDARG00000006112	myof	0.213467	0.134729	1.57332	0.631148	0.115028	6.27003e-51	5.1029e-45
Goblet Cell 2	ENSDARG00000070480	agr2	0.204789	0.0839298	1.44072	0.409836	0.0875521	3.54504e-39	2.88515e-33
Goblet Cell 2	ENSDARG00000074697	npdc1a	0.188789	0.0789202	0.876466	0.418033	0.09958	2.53192e-44	2.06062e-38
Goblet Cell 2	ENSDARG00000017294	gnai2b	0.185923	0.0868657	0.979753	0.467213	0.0772756	8.89055e-35	7.23563e-29
Goblet Cell 2	ENSDARG00000061741	itpr3	0.183564	0.0887729	1.11091	0.483607	0.0799692	6.24498e-36	5.08251e-30
Goblet Cell 2	ENSDARG00000100055	tox2	0.181085	0.0846052	1.71151	0.467213	0.0697466	1.49274e-31	1.21488e-25
Goblet Cell 2	ENSDARG00000013312	cadps2	0.174349	0.0943201	1.14333	0.540984	0.0988903	4.99403e-44	4.06443e-38
Goblet Cell 2	ENSDARG00000069953	kcnq5b	0.171091	0.0799361	1.38431	0.467213	0.0745177	1.34913e-33	1.098e-27
Goblet Cell 2	ENSDARG00000104094	grk3	0.16803	0.119825	1.79468	0.713115	0.119675	6.46469e-53	5.26133e-47
Goblet Cell 2	ENSDARG00000056554	rap1gap	0.167513	0.111217	1.99822	0.663934	0.134829	2.15281e-59	1.75208e-53
Goblet Cell 2	ENSDARG00000060978	atp2a3	0.156702	0.100187	1.74941	0.639344	0.0866997	8.21125e-39	6.68278e-33
Goblet Cell 2	ENSDARG00000029480	specc1	0.142599	0.105196	2.17935	0.737705	0.06904	2.99764e-31	2.43965e-25
Goblet Cell 2	ENSDARG00000079027	chsy1	0.135747	0.0934652	2.83434	0.688525	0.0855029	2.67089e-38	2.17372e-32
Goblet Cell 2	ENSDARG00000014181	foxp1b	0.125947	0.0846527	2.47022	0.672131	0.0941836	5.15179e-42	4.19282e-36
Goblet Cell 2	ENSDARG00000079097	tanc2a	0.111446	0.0822142	1.91615	0.737705	0.0826099	4.62365e-37	3.76298e-31
Goblet Cell 2	ENSDARG00000052826	runx3	0.109843	0.0819318	2.15566	0.745902	0.0463868	1.57415e-21	1.28113e-15
Goblet Cell 2	ENSDARG00000051748	ccnd2a	0.107313	0.093239	5.90967	0.868852	0.0475925	4.77339e-22	3.88485e-16
Goblet Cell 3	ENSDARG00000070480	agr2	0.248033	0.130791	1.85648	0.527311	0.149643	3.92573e-206	3.19498e-200
Goblet Cell 3	ENSDARG00000006588	zgc:111983	0.235426	0.203278	5.35376	0.863445	0.0606699	1.36452e-84	1.11053e-78
Goblet Cell 3	ENSDARG00000070331	muc5.1	0.224826	0.193652	6.77592	0.861345	0.26233	0	0
Goblet Cell 3	ENSDARG00000093584	zgc:193505	0.219547	0.160048	2.39535	0.728992	0.035986	6.75719e-51	5.49938e-45
Goblet Cell 3	ENSDARG00000076830	si:dkey-65b12.6	0.214209	0.126905	1.70977	0.592437	0.165256	1.69712e-227	1.38121e-221
Goblet Cell 3	ENSDARG00000103199	si:dkey-247k7.2	0.212749	0.148388	2.09061	0.697479	0.0371051	2.00157e-52	1.62899e-46
Goblet Cell 3	ENSDARG00000060682	agr1	0.211459	0.121722	1.21936	0.57563	0.0252568	3.10119e-36	2.52392e-30
Goblet Cell 3	ENSDARG00000094041	krt17	0.20942	0.162785	3.8335	0.777311	0.0345432	6.31551e-49	5.13992e-43
Goblet Cell 3	ENSDARG00000111240	dhrs13a.2	0.208361	0.14095	1.76226	0.676471	0.0345651	5.89401e-49	4.79688e-43
Goblet Cell 3	ENSDARG00000056836	si:ch211-125o16.4	0.20753	0.190091	6.30322	0.915966	0.0593677	8.16934e-83	6.64866e-77
Goblet Cell 3	ENSDARG00000021787	abcb5	0.206328	0.171651	4.60653	0.831933	0.0612438	2.24803e-85	1.82957e-79
Goblet Cell 3	ENSDARG00000017624	krt4	0.205763	0.18242	12.9577	0.886555	0.0448376	5.54623e-63	4.51383e-57
Goblet Cell 3	ENSDARG00000025866	ankdd1b	0.205343	0.121222	1.04212	0.590336	0.164423	2.34456e-226	1.90813e-220
Goblet Cell 3	ENSDARG00000076952	fer1l4	0.204302	0.139063	1.24107	0.680672	0.192458	9.50592e-265	7.73645e-259
Goblet Cell 3	ENSDARG00000058556	muc5.2	0.201988	0.196471	22.9719	0.972689	0.335951	0	0
Goblet Cell 3	ENSDARG00000007080	rhcgl1	0.20132	0.126882	1.26709	0.630252	0.03409	2.62704e-48	2.13803e-42
Goblet Cell 3	ENSDARG00000087093	si:ch211-157c3.4	0.200307	0.139289	1.89841	0.695378	0.0325667	3.16442e-46	2.57538e-40
Goblet Cell 3	ENSDARG00000092551	si:dkey-56e3.2	0.199688	0.122078	1.31156	0.611345	0.029304	9.08827e-42	7.39654e-36
Goblet Cell 3	ENSDARG00000015709	hsd17b12a	0.196125	0.143797	1.57812	0.733193	0.0456007	5.03915e-64	4.10114e-58
Goblet Cell 3	ENSDARG00000041433	si:dkey-7c18.24	0.191286	0.167174	4.08124	0.87395	0.0547972	1.41243e-76	1.14952e-70
Goblet Cell 3	ENSDARG00000019360	sec23b	0.186053	0.136804	1.57449	0.735294	0.0493296	4.09672e-69	3.33414e-63
Goblet Cell 3	ENSDARG00000042055	fam129aa	0.183134	0.135042	1.57508	0.737395	0.0469924	6.34815e-66	5.16648e-60
Goblet Cell 3	ENSDARG00000076230	atp10b	0.175707	0.120706	1.44359	0.686975	0.040958	1.09771e-57	8.93375e-52
Goblet Cell 3	ENSDARG00000103917	znf185	0.174128	0.163885	4.774	0.941176	0.0762693	6.98503e-106	5.68481e-100
Goblet Cell 3	ENSDARG00000101043	ppl	0.168513	0.158246	5.84682	0.939076	0.0597827	2.21741e-83	1.80465e-77
Goblet Cell 3	ENSDARG00000102146	si:ch211-69b7.6	0.159898	0.154859	10.1709	0.968487	0.0655121	3.36054e-91	2.73499e-85
Goblet Cell 3	ENSDARG00000019808	evpla	0.159226	0.151532	5.50472	0.951681	0.0649041	2.27133e-90	1.84854e-84
Goblet Cell 3	ENSDARG00000007737	zyg11	0.148658	0.119301	1.966	0.802521	0.0352863	6.10185e-50	4.96602e-44
Goblet Cell 3	ENSDARG00000102335	ano1	0.147642	0.121898	2.55474	0.82563	0.0874483	3.83385e-121	3.1202e-115
Goblet Cell 3	ENSDARG00000063572	perp	0.12934	0.11983	3.96023	0.926471	0.031287	1.77323e-44	1.44315e-38
Hypodermis	ENSDARG00000093600	omd	0.441889	0.125155	0.512713	0.283228	0.158609	0	0
Hypodermis	ENSDARG00000020031	cldn11a	0.429316	0.148902	0.674426	0.346835	0.196468	0	0
Hypodermis	ENSDARG00000068263	csf1b	0.336249	0.141523	1.0434	0.420886	0.170864	0	0
Hypodermis	ENSDARG00000074075	antxr1b	0.325305	0.179845	1.36361	0.552848	0.267448	0	0
Hypodermis	ENSDARG00000052615	tnmd	0.32205	0.133814	1.03117	0.415506	0.168688	0	0
Hypodermis	ENSDARG00000009014	col11a1b	0.319785	0.275562	4.72309	0.861709	0.425151	0	0
Hypodermis	ENSDARG00000019601	col12a1b	0.31346	0.298183	12.8858	0.951266	0.489417	0	0
Hypodermis	ENSDARG00000002847	fndc1	0.309371	0.142448	1.3501	0.460443	0.193246	0	0
Hypodermis	ENSDARG00000073810	thbs2b	0.301195	0.132678	1.24452	0.440506	0.182584	0	0
Hypodermis	ENSDARG00000045580	lum	0.297142	0.164556	1.96042	0.553797	0.190562	0	0
Hypodermis	ENSDARG00000089913	cacna1g	0.290808	0.235315	4.41345	0.809177	0.3477	0	0
Hypodermis	ENSDARG00000099371	cygb1	0.257703	0.153154	1.54919	0.594304	0.21185	0	0
Hypodermis	ENSDARG00000074335	boc	0.253035	0.191218	2.54987	0.755696	0.281089	0	0
Hypodermis	ENSDARG00000051896	fbn2a	0.247896	0.155877	1.87521	0.628797	0.172168	0	0
Hypodermis	ENSDARG00000012066	dcn	0.231563	0.155719	2.0089	0.672468	0.181301	0	0
Hypodermis	ENSDARG00000097827	lrp1aa	0.220482	0.148337	1.6212	0.672785	0.220376	0	0
Hypodermis	ENSDARG00000061328	cdon	0.211413	0.129055	1.71187	0.610443	0.181787	0	0
Hypodermis	ENSDARG00000061436	col6a2	0.208699	0.141664	2.04647	0.678797	0.198919	0	0
Hypodermis	ENSDARG00000077139	col6a3	0.20592	0.170145	3.35931	0.826266	0.278656	0	0
Hypodermis	ENSDARG00000074908	col6a1	0.20425	0.151184	2.58598	0.74019	0.218307	0	0
Hypodermis	ENSDARG00000104267	postnb	0.203588	0.151081	3.97347	0.742089	0.154993	0	0
Hypodermis	ENSDARG00000078322	col12a1a	0.20268	0.17882	5.51668	0.882278	0.280802	0	0
Hypodermis	ENSDARG00000069989	bnc2	0.191801	0.149617	3.61282	0.780063	0.168063	0	0
Hypodermis	ENSDARG00000012405	col1a1a	0.188934	0.176318	9.59259	0.933228	0.18196	0	0
Hypodermis	ENSDARG00000056427	auts2a	0.183304	0.153952	4.81214	0.839873	0.257364	0	0
Hypodermis	ENSDARG00000020007	col1a2	0.183116	0.176568	10.6859	0.964241	0.194663	0	0
Hypodermis	ENSDARG00000035809	col1a1b	0.165678	0.161274	13.8467	0.973418	0.169411	0	0
Hypodermis	ENSDARG00000078179	fndc3ba	0.159558	0.126333	3.06586	0.791772	0.168082	0	0
Hypodermis	ENSDARG00000012593	col5a1	0.148624	0.143263	6.47991	0.963924	0.205686	0	0
Hypodermis	ENSDARG00000079967	prkd3	0.13569	0.118213	4.03144	0.871203	0.191749	0	0
Ionocyte	ENSDARG00000035560	capga	0.687019	0.138369	0.355626	0.201405	0.136469	0	0
Ionocyte	ENSDARG00000079484	kcnt1	0.669545	0.130146	0.380338	0.194379	0.122535	0	0
Ionocyte	ENSDARG00000040466	vil1	0.665143	0.359312	1.64638	0.540203	0.372957	0	0
Ionocyte	ENSDARG00000059798	kcnq1.1	0.644628	0.263185	1.0522	0.408275	0.263953	0	0
Ionocyte	ENSDARG00000058546	si:dkey-30c15.12	0.619243	0.158074	0.465158	0.255269	0.162925	0	0
Ionocyte	ENSDARG00000107086	PIEZO2	0.614432	0.292107	1.40392	0.47541	0.303692	0	0
Ionocyte	ENSDARG00000095833	alk	0.605944	0.206712	3.0415	0.34114	0.224739	0	0
Ionocyte	ENSDARG00000076933	aldh1a3	0.579086	0.167261	3.30141	0.288837	0.163764	0	0
Ionocyte	ENSDARG00000058732	scgn	0.567967	0.180011	0.642206	0.31694	0.201902	0	0
Ionocyte	ENSDARG00000074866	ptpn5	0.563821	0.143486	0.496271	0.254489	0.167335	0	0
Ionocyte	ENSDARG00000100971	fxyd6	0.489317	0.122234	0.579491	0.249805	0.131879	0	0
Ionocyte	ENSDARG00000073752	CACNA2D1	0.478067	0.155997	0.679298	0.326308	0.158477	0	0
Ionocyte	ENSDARG00000032799	kcnd2	0.446753	0.254938	2.94457	0.570648	0.357004	0	0
Ionocyte	ENSDARG00000001803	kcnh6a	0.434339	0.149866	0.701242	0.345043	0.185161	0	0
Ionocyte	ENSDARG00000004433	btk	0.430937	0.120434	1.02563	0.279469	0.143096	0	0
Ionocyte	ENSDARG00000061918	cplx2	0.425158	0.148357	0.850296	0.348946	0.198782	0	0
Ionocyte	ENSDARG00000070919	cpne5b	0.418247	0.136151	0.80872	0.325527	0.174059	0	0
Ionocyte	ENSDARG00000004988	ppp3ca	0.402163	0.190564	1.37891	0.473849	0.27848	0	0
Ionocyte	ENSDARG00000087413	bean1	0.401207	0.11651	0.714994	0.290398	0.149638	0	0
Ionocyte	ENSDARG00000009624	CABZ01027646.1	0.401006	0.116451	1.73572	0.290398	0.113982	0	0
Ionocyte	ENSDARG00000008140	kcnab1a	0.39123	0.148429	1.09983	0.379391	0.185592	0	0
Ionocyte	ENSDARG00000002816	rasgrf2b	0.38835	0.184019	1.21457	0.473849	0.248597	0	0
Ionocyte	ENSDARG00000002656	stxbp5a	0.375807	0.15842	1.0243	0.421546	0.18568	0	0
Ionocyte	ENSDARG00000076265	ano8a	0.372862	0.114391	0.610925	0.306792	0.127824	0	0
Ionocyte	ENSDARG00000060496	cacna1ha	0.370727	0.144123	1.05024	0.388759	0.175762	0	0
Ionocyte	ENSDARG00000054378	pcbp3	0.321659	0.143378	1.34188	0.445746	0.216097	0	0
Ionocyte	ENSDARG00000079295	cacna1bb	0.30225	0.114907	0.947265	0.380172	0.21828	0	0
Ionocyte	ENSDARG00000013056	itpk1a	0.290189	0.120969	1.2644	0.416862	0.187319	0	0
Ionocyte	ENSDARG00000088293	doc2b	0.245868	0.159689	3.42254	0.649493	0.151425	0	0
Ionocyte	ENSDARG00000014746	rbfox1	0.190947	0.117013	2.86561	0.612802	0.114005	0	0
Ionocyte (slc9a3.2+)	ENSDARG00000026403	hephl1b	0.840868	0.27703	0.657249	0.329457	0.233866	2.23369e-192	1.8179e-186
Ionocyte (slc9a3.2+)	ENSDARG00000043770	si:dkey-192d15.2	0.830307	0.299297	1.15928	0.360465	0.253571	1.8321e-208	1.49107e-202
Ionocyte (slc9a3.2+)	ENSDARG00000036722	slc9a3.2	0.828408	0.523374	3.79493	0.631783	0.511267	0	0
Ionocyte (slc9a3.2+)	ENSDARG00000014496	trpv6	0.825535	0.163187	0.715133	0.197674	0.138135	2.57664e-114	2.09701e-108
Ionocyte (slc9a3.2+)	ENSDARG00000104775	ly6m2	0.815407	0.170667	0.59509	0.209302	0.151471	3.50094e-125	2.84926e-119
Ionocyte (slc9a3.2+)	ENSDARG00000006522	otop2	0.807509	0.237871	0.710299	0.294574	0.199824	1.33026e-164	1.08264e-158
Ionocyte (slc9a3.2+)	ENSDARG00000045413	gcm2	0.802968	0.217859	0.381489	0.271318	0.202421	1.01262e-166	8.24125e-161
Ionocyte (slc9a3.2+)	ENSDARG00000041119	ceacam1	0.796823	0.460181	2.4622	0.577519	0.41172	0	0
Ionocyte (slc9a3.2+)	ENSDARG00000051873	zgc:158222	0.770672	0.552614	2.03293	0.717054	0.55749	0	0
Ionocyte (slc9a3.2+)	ENSDARG00000040627	grik1b	0.712958	0.328845	0.937175	0.46124	0.296534	1.4657e-243	1.19287e-237
Ionocyte (slc9a3.2+)	ENSDARG00000013730	slc4a4a	0.631276	0.276489	1.70742	0.437984	0.273239	1.58704e-224	1.29162e-218
Ionocyte (slc9a3.2+)	ENSDARG00000100265	rhcgb	0.62688	0.174943	2.31388	0.27907	0.179173	9.19133e-148	7.48042e-142
Ionocyte (slc9a3.2+)	ENSDARG00000101655	sstr5	0.580438	0.301468	0.95014	0.51938	0.365851	2.93061e-300	2.38509e-294
Ionocyte (slc9a3.2+)	ENSDARG00000088813	ppp1r3ab	0.555691	0.176615	0.564516	0.317829	0.137801	4.82205e-114	3.92445e-108
Ionocyte (slc9a3.2+)	ENSDARG00000077330	SH3TC1	0.531063	0.174962	0.687568	0.329457	0.174649	4.48461e-144	3.64983e-138
Ionocyte (slc9a3.2+)	ENSDARG00000100969	tmprss13a	0.510148	0.346031	3.10186	0.678295	0.24228	3.02909e-199	2.46524e-193
Ionocyte (slc9a3.2+)	ENSDARG00000077633	magixb	0.491897	0.322212	1.49318	0.655039	0.408946	0	0
Ionocyte (slc9a3.2+)	ENSDARG00000027957	fgf12a	0.472083	0.151872	0.907814	0.321705	0.157218	7.24321e-130	5.89493e-124
Ionocyte (slc9a3.2+)	ENSDARG00000027041	pcdh17	0.410998	0.299487	12.1348	0.728682	0.240597	7.16903e-198	5.83456e-192
Ionocyte (slc9a3.2+)	ENSDARG00000012204	CDK18	0.392321	0.311728	4.78108	0.794574	0.405621	0	0
Ionocyte (slc9a3.2+)	ENSDARG00000004861	esrrga	0.381876	0.202779	1.14386	0.531008	0.23688	7.74581e-195	6.30397e-189
Ionocyte (slc9a3.2+)	ENSDARG00000003989	crhr1	0.37479	0.246955	4.29225	0.658915	0.230224	2.0975e-189	1.70706e-183
Ionocyte (slc9a3.2+)	ENSDARG00000099117	si:dkey-33i11.4	0.351434	0.227479	1.84436	0.647287	0.399867	0	0
Ionocyte (slc9a3.2+)	ENSDARG00000074307	rapgef5b	0.340267	0.180685	1.23651	0.531008	0.184182	7.57938e-152	6.16852e-146
Ionocyte (slc9a3.2+)	ENSDARG00000077039	esama	0.333044	0.174267	1.5196	0.523256	0.224481	1.02005e-184	8.30174e-179
Ionocyte (slc9a3.2+)	ENSDARG00000060609	cd109	0.330287	0.172825	1.7952	0.523256	0.208529	1.05563e-171	8.59129e-166
Ionocyte (slc9a3.2+)	ENSDARG00000073728	gal3st3	0.325527	0.190521	1.67668	0.585271	0.241672	9.4919e-199	7.72504e-193
Ionocyte (slc9a3.2+)	ENSDARG00000054137	adgrg6	0.295558	0.147779	1.68858	0.5	0.159258	1.57505e-131	1.28186e-125
Ionocyte (slc9a3.2+)	ENSDARG00000076002	osbpl5	0.279781	0.17893	1.47389	0.639535	0.176839	7.36143e-146	5.99115e-140
Ionocyte (slc9a3.2+)	ENSDARG00000018984	eya2	0.22597	0.170791	4.5333	0.755814	0.117947	7.21317e-98	5.87048e-92
Iridophore	ENSDARG00000060345	apoda.1	0.716938	0.398299	1.64362	0.555556	0.414329	0	0
Iridophore	ENSDARG00000075629	si:dkey-197i20.6	0.69711	0.181296	0.427297	0.260068	0.190021	0	0
Iridophore	ENSDARG00000033201	zgc:101840	0.679317	0.336857	1.2354	0.495876	0.358858	0	0
Iridophore	ENSDARG00000113438	CR318624.2	0.677768	0.278211	0.693449	0.41048	0.300043	0	0
Iridophore	ENSDARG00000003991	fhl2b	0.672295	0.448523	6.29418	0.667152	0.482131	0	0
Iridophore	ENSDARG00000062688	gpnmb	0.665768	0.61053	5.36162	0.917031	0.726371	0	0
Iridophore	ENSDARG00000042018	fhl2a	0.665309	0.426753	2.84977	0.641436	0.462963	0	0
Iridophore	ENSDARG00000097804	lypc	0.641628	0.309451	1.0729	0.48229	0.332762	0	0
Iridophore	ENSDARG00000039181	trpm3	0.634804	0.348973	1.65548	0.549733	0.380312	0	0
Iridophore	ENSDARG00000055172	si:ch211-256m1.8	0.627549	0.302356	0.908588	0.481805	0.339476	0	0
Iridophore	ENSDARG00000017474	zgc:110699	0.62417	0.180497	0.519156	0.28918	0.190012	0	0
Iridophore	ENSDARG00000057575	pnp4a	0.612105	0.406585	2.00159	0.664241	0.476606	0	0
Iridophore	ENSDARG00000053709	si:ch73-89b15.3	0.605047	0.248947	0.672335	0.411451	0.280227	0	0
Iridophore	ENSDARG00000091792	akap12a	0.60428	0.53919	5.01311	0.892285	0.678552	0	0
Iridophore	ENSDARG00000075161	defbl1	0.583279	0.258669	1.0208	0.443474	0.293911	0	0
Iridophore	ENSDARG00000074442	alx4b	0.570939	0.458191	2.95182	0.802523	0.536702	0	0
Iridophore	ENSDARG00000010727	ttyh2l	0.516185	0.376683	2.19266	0.729743	0.500231	0	0
Iridophore	ENSDARG00000016835	tcirg1a	0.512107	0.244002	0.944334	0.476468	0.299429	0	0
Iridophore	ENSDARG00000017880	kcnip3b	0.481046	0.181122	0.971431	0.376516	0.221423	0	0
Iridophore	ENSDARG00000075343	csf1a	0.451606	0.19173	1.08982	0.424551	0.221671	0	0
Iridophore	ENSDARG00000088332	alx4a	0.419979	0.333375	3.41112	0.793789	0.406596	0	0
Iridophore	ENSDARG00000042861	ltk	0.413302	0.326671	2.99331	0.790393	0.42209	0	0
Iridophore	ENSDARG00000075436	sytl2b	0.364145	0.264142	2.39895	0.725376	0.423028	0	0
Iridophore	ENSDARG00000029894	slc2a15a	0.354215	0.184068	1.05863	0.519651	0.298063	0	0
Iridophore	ENSDARG00000063068	syne1b	0.353217	0.239762	2.98575	0.678797	0.384182	0	0
Iridophore	ENSDARG00000006508	pip5k1bb	0.317198	0.239322	3.26141	0.754488	0.374826	0	0
Iridophore	ENSDARG00000027903	adamtsl3	0.284393	0.185732	2.02986	0.653081	0.227565	0	0
Iridophore	ENSDARG00000073869	pdzrn3b	0.262274	0.197501	2.55857	0.753033	0.288903	0	0
Iridophore	ENSDARG00000024276	pcbp4	0.249336	0.23131	6.2604	0.927705	0.525951	0	0
Iridophore	ENSDARG00000103476	trpm1b	0.248287	0.201425	2.79385	0.811257	0.423498	0	0
Leukocyte	ENSDARG00000098843	FQ311879.1	0.64444	0.0904813	0.243994	0.140403	0.0970209	0	0
Leukocyte	ENSDARG00000017504	si:ch211-1o7.3	0.603301	0.109419	0.338651	0.181368	0.116201	0	0
Leukocyte	ENSDARG00000098012	itgae.1	0.583885	0.117279	0.374673	0.200859	0.137212	0	0
Leukocyte	ENSDARG00000000767	spi1b	0.580242	0.143192	0.519784	0.246779	0.15966	0	0
Leukocyte	ENSDARG00000055226	slc7a7	0.519664	0.127212	0.504197	0.244797	0.162044	0	0
Leukocyte	ENSDARG00000045959	csf3r	0.511659	0.0892487	0.343425	0.17443	0.111306	0	0
Leukocyte	ENSDARG00000103276	fcer1g	0.424142	0.088976	0.382757	0.209779	0.1274	0	0
Leukocyte	ENSDARG00000054447	slc29a1b	0.422188	0.117437	0.674803	0.278163	0.146996	0	0
Leukocyte	ENSDARG00000057787	itgae.2	0.413232	0.0733087	0.282076	0.177403	0.110032	0	0
Leukocyte	ENSDARG00000071437	ptprc	0.383999	0.268177	2.23663	0.698381	0.4369	0	0
Leukocyte	ENSDARG00000074846	si:dkeyp-68b7.12	0.376084	0.0893308	0.408558	0.237529	0.141732	0	0
Leukocyte	ENSDARG00000036104	myo1g	0.367532	0.0947059	0.518565	0.257681	0.140544	0	0
Leukocyte	ENSDARG00000062349	arhgap15	0.353671	0.0813199	0.421739	0.229931	0.122677	0	0
Leukocyte	ENSDARG00000028389	rab44	0.295063	0.0712557	0.46236	0.241493	0.10597	0	0
Leukocyte	ENSDARG00000077249	gmip	0.294354	0.072057	0.396566	0.244797	0.13451	0	0
Leukocyte	ENSDARG00000089838	si:dkey-262k9.4	0.269241	0.138667	1.31359	0.515031	0.29907	0	0
Leukocyte	ENSDARG00000068784	vsir	0.253248	0.0679344	0.466907	0.268252	0.12176	0	0
Leukocyte	ENSDARG00000043475	tagapb	0.246453	0.0683914	0.509359	0.277502	0.149184	0	0
Leukocyte	ENSDARG00000102762	pik3r5	0.240025	0.071048	0.572444	0.296003	0.143614	0	0
Leukocyte	ENSDARG00000017294	gnai2b	0.233112	0.123064	1.32123	0.527915	0.194037	0	0
Leukocyte	ENSDARG00000102986	csf1ra	0.227963	0.0721467	0.865024	0.316485	0.141726	0	0
Leukocyte	ENSDARG00000074819	si:dkeyp-23e4.3	0.209143	0.106195	3.10512	0.507763	0.168914	0	0
Leukocyte	ENSDARG00000077499	plekho1b	0.202499	0.0780025	0.929301	0.3852	0.125876	0	0
Leukocyte	ENSDARG00000016676	gnao1a	0.192603	0.130311	2.47925	0.676577	0.25898	0	0
Leukocyte	ENSDARG00000102612	slc15a4	0.17943	0.0788969	1.3182	0.439709	0.0980501	0	0
Leukocyte	ENSDARG00000034893	rarab	0.174926	0.119276	2.40873	0.681863	0.191806	0	0
Leukocyte	ENSDARG00000005789	enpp1	0.171783	0.0789965	1.90617	0.459861	0.0793686	0	0
Leukocyte	ENSDARG00000075793	prex1	0.153388	0.0872087	1.44013	0.56855	0.147871	0	0
Leukocyte	ENSDARG00000021488	cyth1b	0.142766	0.0796134	1.47481	0.557648	0.14101	0	0
Leukocyte	ENSDARG00000018174	gnai2a	0.130534	0.0921111	2.53393	0.705649	0.104509	0	0
Leukocyte 2	ENSDARG00000093193	chia.6	0.818811	0.234702	0.433621	0.286638	0.202089	4.03259e-272	3.28194e-266
Leukocyte 2	ENSDARG00000069103	si:dkeyp-82a1.4	0.793488	0.212053	0.381	0.267241	0.197094	2.02722e-265	1.64987e-259
Leukocyte 2	ENSDARG00000077666	evi5a	0.747176	0.230272	0.53577	0.30819	0.202123	3.62872e-272	2.95326e-266
Leukocyte 2	ENSDARG00000036420	si:dkey-33c9.6	0.660641	0.404358	1.24799	0.612069	0.393824	0	0
Leukocyte 2	ENSDARG00000033735	ncf1	0.639053	0.353958	1.29168	0.553879	0.327544	0	0
Leukocyte 2	ENSDARG00000039265	arhgap4a	0.60595	0.333011	1.12861	0.549569	0.317254	0	0
Leukocyte 2	ENSDARG00000054340	sla1a	0.58742	0.203825	0.569382	0.346983	0.185834	2.55601e-250	2.08022e-244
Leukocyte 2	ENSDARG00000091834	si:ch211-198m17.1	0.573249	0.363223	1.49766	0.633621	0.434145	0	0
Leukocyte 2	ENSDARG00000067797	spi1a	0.533882	0.292255	1.05905	0.547414	0.27511	0	0
Leukocyte 2	ENSDARG00000004979	elovl5	0.527988	0.196858	0.553888	0.372845	0.179893	2.35242e-242	1.91453e-236
Leukocyte 2	ENSDARG00000038467	igsf8	0.521084	0.290864	1.50558	0.55819	0.271812	0	0
Leukocyte 2	ENSDARG00000033516	efr3ba	0.492743	0.206017	0.860025	0.418103	0.221439	4.31494e-298	3.51174e-292
Leukocyte 2	ENSDARG00000076202	zdhhc11	0.487268	0.204778	0.73537	0.420259	0.204627	1.58524e-275	1.29016e-269
Leukocyte 2	ENSDARG00000100293	arhgef15	0.484855	0.238248	1.08418	0.491379	0.23006	0	9.31963e-304
Leukocyte 2	ENSDARG00000087131	ifnlr1	0.479104	0.192055	0.644028	0.400862	0.183843	1.19276e-247	9.70739e-242
Leukocyte 2	ENSDARG00000061421	FQ311928.1	0.420398	0.261843	2.57555	0.622845	0.292021	0	0
Leukocyte 2	ENSDARG00000033042	ptprja	0.418121	0.265831	1.73087	0.635776	0.323156	0	0
Leukocyte 2	ENSDARG00000055875	pag1	0.414439	0.389429	5.414	0.939655	0.544212	0	0
Leukocyte 2	ENSDARG00000055955	lcp2a	0.40042	0.216607	1.16646	0.540948	0.244053	0	0
Leukocyte 2	ENSDARG00000059365	nipal4	0.396578	0.323929	2.78409	0.81681	0.483846	0	0
Leukocyte 2	ENSDARG00000103207	rab11fip4b	0.3948	0.211864	1.0551	0.536638	0.21151	9.20049e-285	7.48787e-279
Leukocyte 2	ENSDARG00000002607	unm_sa1614	0.390558	0.224739	1.34978	0.575431	0.245973	0	0
Leukocyte 2	ENSDARG00000044694	fybb	0.387068	0.198539	0.870287	0.512931	0.222274	3.27135e-299	2.6624e-293
Leukocyte 2	ENSDARG00000076697	SIPA1	0.381545	0.249978	1.45878	0.655172	0.314824	0	0
Leukocyte 2	ENSDARG00000052496	arhgap45a	0.354471	0.208557	1.19458	0.588362	0.232656	0	3.0319e-307
Leukocyte 2	ENSDARG00000074819	si:dkeyp-23e4.3	0.324775	0.279278	5.55298	0.859914	0.312275	0	0
Leukocyte 2	ENSDARG00000011333	arhgap33	0.287876	0.227075	2.5713	0.788793	0.30085	0	0
Leukocyte 2	ENSDARG00000035452	camkk1a	0.282966	0.22869	2.45979	0.80819	0.267963	0	0
Leukocyte 2	ENSDARG00000022187	usp6nl	0.25828	0.202059	2.39311	0.782328	0.250533	0	0
Leukocyte 2	ENSDARG00000078430	tiam1a	0.247893	0.231331	4.14544	0.93319	0.22203	6.9551e-299	5.66045e-293
Melanophore	ENSDARG00000061303	oca2	0.704671	0.292043	2.08232	0.414439	0.270226	0	0
Melanophore	ENSDARG00000056151	tyrp1b	0.695003	0.406348	2.89301	0.58467	0.398479	0	0
Melanophore	ENSDARG00000011076	zgc:91968	0.68446	0.182401	0.364665	0.266488	0.172739	0	0
Melanophore	ENSDARG00000091298	pmela	0.65484	0.30816	1.31898	0.470588	0.295299	0	0
Melanophore	ENSDARG00000036117	mchr2	0.633116	0.185646	0.404372	0.293226	0.185943	0	0
Melanophore	ENSDARG00000115903	KIRREL3	0.545731	0.287457	1.18442	0.526738	0.28306	0	0
Melanophore	ENSDARG00000103800	prkar1b	0.51472	0.410583	4.8444	0.797683	0.532617	0	0
Melanophore	ENSDARG00000008861	tfap2e	0.5106	0.209792	0.734772	0.410873	0.246413	0	0
Melanophore	ENSDARG00000101586	si:ch73-389b16.1	0.509238	0.321337	1.60594	0.631016	0.401781	0	0
Melanophore	ENSDARG00000017466	ncam2	0.506394	0.341658	6.625	0.674688	0.389842	0	0
Melanophore	ENSDARG00000034757	zdhhc2	0.468665	0.247282	0.979787	0.527629	0.305441	0	0
Melanophore	ENSDARG00000069765	syngap1b	0.444984	0.335126	2.7474	0.753119	0.453622	0	0
Melanophore	ENSDARG00000070991	mlpha	0.430271	0.299119	1.84041	0.695187	0.404006	0	0
Melanophore	ENSDARG00000061692	yjefn3	0.415919	0.217968	1.51212	0.524064	0.302576	0	0
Melanophore	ENSDARG00000010192	pax3a	0.408693	0.198882	1.26147	0.486631	0.244603	0	0
Melanophore	ENSDARG00000078142	SPAG9	0.378876	0.259	2.09796	0.683601	0.319435	0	0
Melanophore	ENSDARG00000091342	adcy5	0.370618	0.306536	4.20922	0.827094	0.449909	0	0
Melanophore	ENSDARG00000059832	adgrb3	0.367939	0.212827	2.40169	0.578431	0.305488	0	0
Melanophore	ENSDARG00000063180	dock3	0.358262	0.227666	1.44496	0.635472	0.308729	0	0
Melanophore	ENSDARG00000063706	pde8b	0.349306	0.220729	1.4786	0.631907	0.256535	0	0
Melanophore	ENSDARG00000043317	kita	0.344836	0.26585	3.30266	0.770945	0.398932	0	0
Melanophore	ENSDARG00000031348	mc5ra	0.330474	0.181731	2.09133	0.549911	0.265493	0	0
Melanophore	ENSDARG00000099729	pcdh10a	0.30242	0.174121	1.18326	0.575758	0.267167	0	0
Melanophore	ENSDARG00000013000	ppfia2	0.293989	0.187346	2.08265	0.637255	0.293772	0	0
Melanophore	ENSDARG00000109783	igsf11	0.285469	0.260281	4.78703	0.911765	0.431653	0	0
Melanophore	ENSDARG00000103476	trpm1b	0.283667	0.241446	3.33202	0.851159	0.412275	0	0
Melanophore	ENSDARG00000088168	ablim3	0.262345	0.182847	1.75142	0.69697	0.319846	0	0
Melanophore	ENSDARG00000012204	CDK18	0.262099	0.191785	2.82105	0.731729	0.390391	0	0
Melanophore	ENSDARG00000079742	mcf2l2	0.23377	0.210851	4.31736	0.901961	0.365799	0	0
Melanophore	ENSDARG00000003449	pde10a	0.232531	0.163725	2.1108	0.7041	0.214331	0	0
MLC	ENSDARG00000041413	adgrg11	0.474271	0.414158	4.19363	0.873252	0.586446	0	0
MLC	ENSDARG00000087870	adgrf3a	0.473787	0.370871	2.6356	0.78278	0.511548	0	0
MLC	ENSDARG00000110748	CABZ01056052.1	0.461376	0.102842	0.391178	0.222902	0.129091	0	0
MLC	ENSDARG00000075855	adgre10	0.456258	0.122639	0.48065	0.268794	0.16466	0	0
MLC	ENSDARG00000100835	RGS13	0.440085	0.0934796	0.358383	0.212413	0.112903	0	0
MLC	ENSDARG00000038968	ccr6b	0.430245	0.106433	0.415873	0.247378	0.145663	0	0
MLC	ENSDARG00000062598	ltc4s	0.42685	0.0979443	0.400759	0.229458	0.132468	0	0
MLC	ENSDARG00000037782	sox8b	0.406612	0.127777	0.613035	0.314248	0.169666	0	0
MLC	ENSDARG00000079826	gpr174	0.370771	0.106953	0.478079	0.288462	0.145186	0	0
MLC	ENSDARG00000057273	alox5a	0.357884	0.163769	1.03153	0.457605	0.249325	0	0
MLC	ENSDARG00000087804	tnfrsf11a	0.325249	0.223324	2.37363	0.686626	0.26448	0	0
MLC	ENSDARG00000096662	abcc3	0.324348	0.285789	3.80123	0.881119	0.469188	0	0
MLC	ENSDARG00000069463	alox12	0.319502	0.16394	1.23656	0.513112	0.221729	0	0
MLC	ENSDARG00000020656	prkg1a	0.293793	0.162562	1.34907	0.553322	0.252371	0	0
MLC	ENSDARG00000068763	plcg2	0.280873	0.124355	0.855391	0.442745	0.21213	0	0
MLC	ENSDARG00000043010	camk2d1	0.279279	0.209826	2.87556	0.751311	0.279837	0	0
MLC	ENSDARG00000078749	b4galnt3a	0.270497	0.109003	0.800931	0.402972	0.16447	0	0
MLC	ENSDARG00000001414	mctp2a	0.246026	0.100432	0.847676	0.408217	0.0689528	0	0
MLC	ENSDARG00000099902	il17rc	0.238286	0.119768	1.26484	0.502622	0.0766247	0	0
MLC	ENSDARG00000012555	ak5	0.238009	0.101945	1.01512	0.428322	0.175615	0	0
MLC	ENSDARG00000098652	pcdh11	0.229656	0.0946527	1.16146	0.41215	0.141573	0	0
MLC	ENSDARG00000041339	zgc:92380	0.22285	0.141619	1.53403	0.63549	0.240826	0	0
MLC	ENSDARG00000052387	pou2f3	0.213266	0.152772	2.16277	0.716346	0.289009	0	0
MLC	ENSDARG00000074311	mast2	0.209771	0.167413	3.3534	0.798077	0.27189	0	0
MLC	ENSDARG00000068760	tnks1bp1	0.192186	0.139939	2.11293	0.728147	0.142178	0	0
MLC	ENSDARG00000062855	plekhg7	0.180018	0.0951231	1.13293	0.528409	0.103928	0	0
MLC	ENSDARG00000004115	mgat4b	0.160533	0.0991405	3.31406	0.61757	0.164384	0	0
MLC	ENSDARG00000062190	PDE3B	0.158802	0.115354	2.32644	0.726399	0.188564	0	0
MLC	ENSDARG00000060813	plekha7a	0.157678	0.0946897	1.51097	0.600524	0.152556	0	0
MLC	ENSDARG00000079434	tmem131l	0.144174	0.087777	1.37543	0.608829	0.118972	0	0
Muscle	ENSDARG00000067848	nmrk2	0.550945	0.36046	2.83622	0.654258	0.476979	0	0
Muscle	ENSDARG00000104384	AGBL1	0.522397	0.396079	9.6976	0.758195	0.513622	0	0
Muscle	ENSDARG00000055642	si:ch211-217a12.1	0.50596	0.227603	1.71282	0.449844	0.289617	0	0
Muscle	ENSDARG00000014179	pfkma	0.492083	0.17751	0.711907	0.360731	0.244668	0	0
Muscle	ENSDARG00000010472	atp1a2a	0.490151	0.280802	1.45239	0.572887	0.394667	0	0
Muscle	ENSDARG00000021184	rbfox1l	0.488515	0.22563	0.854618	0.461868	0.308287	0	0
Muscle	ENSDARG00000091260	mylk4a	0.47637	0.207308	0.752358	0.435184	0.297371	0	0
Muscle	ENSDARG00000099974	ldb3b	0.473808	0.316548	2.14385	0.668094	0.454794	0	0
Muscle	ENSDARG00000005526	igfn1.1	0.472516	0.243847	2.00963	0.51606	0.327807	0	0
Muscle	ENSDARG00000041779	trdn	0.471489	0.340394	2.14417	0.721957	0.501811	0	0
Muscle	ENSDARG00000033832	ampd1	0.470986	0.255392	1.73974	0.54225	0.35439	0	0
Muscle	ENSDARG00000020594	txlnba	0.452911	0.233282	1.17571	0.515072	0.336787	0	0
Muscle	ENSDARG00000078989	alpk3a	0.439423	0.191012	0.778532	0.43469	0.282475	0	0
Muscle	ENSDARG00000023797	ryr1b	0.437431	0.297577	3.23753	0.680283	0.438446	0	0
Muscle	ENSDARG00000056322	ldb3a	0.435949	0.251114	1.30931	0.576017	0.372719	0	0
Muscle	ENSDARG00000090408	ERBB4	0.404198	0.238285	1.36265	0.589524	0.379184	0	0
Muscle	ENSDARG00000061081	arpp21	0.403487	0.211081	1.29981	0.523143	0.347518	0	0
Muscle	ENSDARG00000077295	akap6	0.402646	0.186168	1.67221	0.462362	0.277609	0	0
Muscle	ENSDARG00000075433	myom2a	0.393866	0.193008	1.45068	0.490035	0.300462	0	0
Muscle	ENSDARG00000057903	si:ch211-266g18.10	0.38149	0.285285	2.57845	0.747817	0.485129	0	0
Muscle	ENSDARG00000029764	mef2ca	0.351536	0.275508	2.8521	0.783726	0.45626	0	0
Muscle	ENSDARG00000098764	musk	0.351066	0.251893	2.18342	0.717509	0.43119	0	0
Muscle	ENSDARG00000068457	tnnt3b	0.335523	0.230738	4.38621	0.687696	0.376857	0	0
Muscle	ENSDARG00000020239	lpin1	0.334256	0.216928	1.75536	0.648987	0.360993	0	0
Muscle	ENSDARG00000071331	ryr3	0.331085	0.176804	1.76261	0.534014	0.293597	0	0
Muscle	ENSDARG00000008487	dmd	0.291362	0.203632	1.78426	0.698896	0.401235	0	0
Muscle	ENSDARG00000035458	atp2a1l	0.288542	0.176614	3.47448	0.61209	0.320333	0	0
Muscle	ENSDARG00000067829	ppargc1a	0.284112	0.175399	2.9261	0.617361	0.359337	0	0
Muscle	ENSDARG00000009418	mef2cb	0.255453	0.212029	5.7046	0.830012	0.397081	0	0
Muscle	ENSDARG00000028213	ttn.2	0.201602	0.195425	27.0499	0.969363	0.550301	0	0
Muscle 2	ENSDARG00000067990	myhz1.1	0.545127	0.420958	18.9285	0.772219	0.374797	0	0
Muscle 2	ENSDARG00000067995	myhz1.2	0.542388	0.363709	9.2501	0.670569	0.330399	0	0
Muscle 2	ENSDARG00000095930	myha	0.523753	0.218253	2.56709	0.416711	0.172661	0	0
Muscle 2	ENSDARG00000012944	myhz2	0.523067	0.410882	14.4828	0.785524	0.354735	0	0
Muscle 2	ENSDARG00000053254	mylpfa	0.517177	0.482772	26.6315	0.933475	0.557286	0	0
Muscle 2	ENSDARG00000024433	pvalb4	0.509714	0.276694	2.10321	0.542842	0.263807	0	0
Muscle 2	ENSDARG00000027355	slc25a4	0.501164	0.209641	0.542841	0.418308	0.212983	0	0
Muscle 2	ENSDARG00000002768	pvalb2	0.496231	0.443677	15.3485	0.894093	0.478992	0	0
Muscle 2	ENSDARG00000067997	myhz1.3	0.495945	0.237019	1.72507	0.477914	0.240928	0	0
Muscle 2	ENSDARG00000099420	nme2b.2	0.486715	0.44268	6.41518	0.909526	0.536687	0	0
Muscle 2	ENSDARG00000070835	tnnc2	0.486147	0.37593	2.93071	0.773284	0.438479	0	0
Muscle 2	ENSDARG00000033683	tpma	0.479511	0.356252	3.69426	0.742948	0.401041	0	0
Muscle 2	ENSDARG00000043457	gapdh	0.476638	0.310233	1.73508	0.650878	0.33693	0	0
Muscle 2	ENSDARG00000040565	ckmb	0.474325	0.413488	4.20372	0.87174	0.512133	0	0
Muscle 2	ENSDARG00000099197	actc1b	0.473479	0.461636	14.5885	0.974987	0.631019	0	0
Muscle 2	ENSDARG00000000563	ttn.1	0.469774	0.463774	69.1261	0.987227	0.612114	0	0
Muscle 2	ENSDARG00000014196	myl1	0.468968	0.24559	1.02553	0.523683	0.256758	0	0
Muscle 2	ENSDARG00000029995	tnni2b.2	0.449205	0.251736	1.39937	0.560404	0.264517	0	0
Muscle 2	ENSDARG00000020574	atp2a1	0.443545	0.340626	3.41417	0.767962	0.366663	0	0
Muscle 2	ENSDARG00000017441	mylz3	0.442833	0.39617	9.27438	0.894625	0.492353	0	0
Muscle 2	ENSDARG00000035327	ckma	0.440929	0.378509	4.37855	0.858435	0.462724	0	0
Muscle 2	ENSDARG00000028213	ttn.2	0.440247	0.433687	75.0517	0.985098	0.565509	0	0
Muscle 2	ENSDARG00000037789	pvalb1	0.433028	0.345685	5.81669	0.798297	0.386347	0	0
Muscle 2	ENSDARG00000013755	actn3a	0.431262	0.266928	1.22362	0.618946	0.299229	0	0
Muscle 2	ENSDARG00000032630	neb	0.429976	0.387642	8.59099	0.901543	0.492842	0	0
Muscle 2	ENSDARG00000096257	si:ch73-367p23.2	0.427187	0.277137	1.51718	0.648749	0.299582	0	0
Muscle 2	ENSDARG00000061249	myom1a	0.370289	0.212635	0.896135	0.574242	0.238621	0	0
Muscle 2	ENSDARG00000104836	myom1b	0.35454	0.200007	1.23409	0.56413	0.221986	0	0
Muscle 2	ENSDARG00000035458	atp2a1l	0.354419	0.28444	4.5493	0.802555	0.335193	0	0
Muscle 2	ENSDARG00000068457	tnnt3b	0.29641	0.244195	3.72765	0.823842	0.300776	0	0
Myofibroblast	ENSDARG00000055439	adamtsl7	0.547946	0.0960146	0.439603	0.175227	0.0990079	0	0
Myofibroblast	ENSDARG00000070069	pitx3	0.433026	0.0669816	0.251726	0.154683	0.069551	3.8868e-260	3.16329e-254
Myofibroblast	ENSDARG00000095901	col18a1b	0.379431	0.0926224	0.509325	0.244109	0.117636	0	0
Myofibroblast	ENSDARG00000078362	zmp:0000000846	0.340952	0.237739	5.02738	0.697281	0.277361	0	0
Myofibroblast	ENSDARG00000068191	cdh15	0.314314	0.0752075	0.419846	0.239275	0.0866298	0	0
Myofibroblast	ENSDARG00000032617	fgfrl1a	0.311821	0.145642	1.39403	0.467069	0.174589	0	0
Myofibroblast	ENSDARG00000104555	sh2d3cb	0.286985	0.0730035	0.551164	0.254381	0.0911843	0	0
Myofibroblast	ENSDARG00000103156	gpc6a	0.270784	0.0844258	1.22716	0.311782	0.082919	0	4.70636e-304
Myofibroblast	ENSDARG00000098764	musk	0.247529	0.117109	1.37854	0.473112	0.125148	0	0
Myofibroblast	ENSDARG00000068247	luzp2	0.245174	0.105032	1.88321	0.428399	0.10554	0	0
Myofibroblast	ENSDARG00000037496	gria4a	0.244193	0.0823323	0.966135	0.33716	0.0671015	5.15128e-251	4.1924e-245
Myofibroblast	ENSDARG00000070903	met	0.233192	0.111453	1.33932	0.477946	0.168725	0	0
Myofibroblast	ENSDARG00000017229	megf10	0.22087	0.108366	1.1849	0.490634	0.141203	0	0
Myofibroblast	ENSDARG00000052361	il15	0.21699	0.10384	1.20824	0.47855	0.0831883	0	4.661e-305
Myofibroblast	ENSDARG00000060452	sdk2b	0.207793	0.0897715	1.07884	0.432024	0.102625	0	0
Myofibroblast	ENSDARG00000004635	epha7	0.162072	0.0686479	1.45749	0.423565	0.0673703	5.13909e-252	4.18248e-246
Myofibroblast	ENSDARG00000100398	pax7a	0.156406	0.086094	1.6438	0.550453	0.1787	0	0
Myofibroblast	ENSDARG00000056181	ncam1a	0.147259	0.0839954	2.57874	0.570393	0.0857425	0	0
Myofibroblast	ENSDARG00000052131	gli3	0.146782	0.0827477	1.41589	0.563746	0.0831854	0	4.77665e-305
Myofibroblast	ENSDARG00000104110	col4a2	0.145702	0.0641794	1.07587	0.440483	0.106813	0	0
Myofibroblast	ENSDARG00000028661	cntfr	0.140074	0.107235	9.77104	0.765559	0.0984925	0	0
Myofibroblast	ENSDARG00000097478	qkia	0.132326	0.0828339	1.71045	0.625982	0.0554515	1.16601e-207	9.48967e-202
Myofibroblast	ENSDARG00000070818	pax7b	0.130556	0.0647654	1.50696	0.496073	0.14891	0	0
Myofibroblast	ENSDARG00000104314	nrg1	0.129432	0.0643643	1.56808	0.497281	0.0153336	1.10506e-58	8.99363e-53
Myofibroblast	ENSDARG00000069954	kcnq5a	0.125996	0.0657765	2.21462	0.522054	0.0606514	5.27297e-227	4.29144e-221
Myofibroblast	ENSDARG00000035308	grb10b	0.125885	0.0816161	2.18732	0.648338	0.0539287	5.37082e-202	4.37107e-196
Myofibroblast	ENSDARG00000098954	stard13b	0.123336	0.0656548	1.99698	0.532326	0.0531206	5.43306e-199	4.42173e-193
Myofibroblast	ENSDARG00000076564	hspg2	0.116176	0.0689332	1.80752	0.593353	0.0633929	3.30286e-237	2.68805e-231
Myofibroblast	ENSDARG00000099979	tgfbr3	0.110815	0.0845003	3.22859	0.762538	0.0713734	6.32388e-267	5.14673e-261
NCC Ionocyte	ENSDARG00000095188	si:dkey-189h5.6	0.915385	0.500769	1.4862	0.547059	0.442609	3.8326e-254	3.11919e-248
NCC Ionocyte	ENSDARG00000007739	atp1a1a.2	0.910062	0.535331	1.80841	0.588235	0.481849	1.39504e-276	1.13536e-270
NCC Ionocyte	ENSDARG00000071173	slc12a10.2	0.90378	0.754922	18.3668	0.835294	0.737728	0	0
NCC Ionocyte	ENSDARG00000060439	clcn2c	0.881486	0.663707	4.02324	0.752941	0.615897	0	0
NCC Ionocyte	ENSDARG00000055253	slc12a10.3	0.82947	0.336667	1.16414	0.405882	0.290123	4.44273e-167	3.61575e-161
NCC Ionocyte	ENSDARG00000009550	foxi3b	0.695336	0.175879	0.409718	0.252941	0.18626	7.02169e-108	5.71465e-102
NCC Ionocyte	ENSDARG00000101264	trim35-12	0.689546	0.304212	0.913607	0.441176	0.31357	1.87552e-180	1.5264e-174
NCC Ionocyte	ENSDARG00000105590	si:cabz01007794.1	0.673299	0.526758	4.09349	0.782353	0.417003	1.65147e-239	1.34406e-233
NCC Ionocyte	ENSDARG00000016570	prlra	0.661953	0.292038	1.19186	0.441176	0.227548	2.09735e-131	1.70694e-125
NCC Ionocyte	ENSDARG00000044808	slc4a4b	0.636512	0.479256	5.56891	0.752941	0.457243	1.64814e-262	1.34135e-256
NCC Ionocyte	ENSDARG00000040615	ilkap	0.60943	0.172074	0.57578	0.282353	0.126917	4.44122e-74	3.61452e-68
NCC Ionocyte	ENSDARG00000076833	atp1b1b	0.602009	0.552432	5.7894	0.917647	0.691752	0	0
NCC Ionocyte	ENSDARG00000039131	atp1a1a.3	0.575762	0.423354	3.10983	0.735294	0.533218	5.59823e-306	4.55615e-300
NCC Ionocyte	ENSDARG00000056331	ahcyl1	0.525119	0.361405	2.49957	0.688235	0.286353	6.27727e-165	5.10879e-159
NCC Ionocyte	ENSDARG00000099117	si:dkey-33i11.4	0.519001	0.421307	3.00201	0.811765	0.555826	0	0
NCC Ionocyte	ENSDARG00000078541	cers3a	0.50892	0.269428	1.08607	0.529412	0.24025	1.20853e-138	9.83572e-133
NCC Ionocyte	ENSDARG00000076998	si:ch73-92i20.1	0.469666	0.193392	0.748053	0.411765	0.207911	3.24404e-120	2.64018e-114
NCC Ionocyte	ENSDARG00000093081	si:ch73-92i20.1	0.449918	0.18526	0.701233	0.411765	0.19131	9.31332e-111	7.5797e-105
NCC Ionocyte	ENSDARG00000098662	si:ch73-359m17.9	0.445006	0.183238	0.767418	0.411765	0.200007	1.03385e-115	8.41404e-110
NCC Ionocyte	ENSDARG00000105441	pcdh11	0.413401	0.260199	2.94033	0.629412	0.200533	5.18767e-116	4.22202e-110
NCC Ionocyte	ENSDARG00000103650	si:ch73-329n5.1	0.33563	0.230993	1.75414	0.688235	0.1055	7.04761e-62	5.73574e-56
NCC Ionocyte	ENSDARG00000061551	rap1gap2a	0.322741	0.205036	2.61488	0.635294	0.205451	8.18171e-119	6.65873e-113
NCC Ionocyte	ENSDARG00000013087	ndrg3a	0.319116	0.182084	1.43368	0.570588	0.20171	1.10677e-116	9.00752e-111
NCC Ionocyte	ENSDARG00000090063	fa2h	0.315815	0.23779	2.38408	0.752941	0.243967	9.19559e-141	7.48388e-135
NCC Ionocyte	ENSDARG00000052688	paqr5b	0.308471	0.17601	1.43153	0.570588	0.075123	1.44726e-44	1.17786e-38
NCC Ionocyte	ENSDARG00000076796	dlg3	0.303682	0.203646	2.07521	0.670588	0.176621	2.17282e-102	1.76836e-96
NCC Ionocyte	ENSDARG00000079355	flrt2	0.290024	0.216665	3.51091	0.747059	0.169976	1.32499e-98	1.07835e-92
NCC Ionocyte	ENSDARG00000059365	nipal4	0.276859	0.188916	1.74195	0.682353	0.276305	3.37047e-159	2.74307e-153
NCC Ionocyte	ENSDARG00000067829	ppargc1a	0.260163	0.172932	2.60461	0.664706	0.155403	2.64598e-90	2.15345e-84
NCC Ionocyte	ENSDARG00000034677	scel	0.247264	0.189084	2.74975	0.764706	0.0774174	7.11658e-46	5.79187e-40
Neuron	ENSDARG00000079443	vipb	0.938956	0.276163	1.15584	0.294118	0.211361	9.30323e-44	7.57149e-38
Neuron	ENSDARG00000101959	etv1	0.862471	0.439691	1.90138	0.509804	0.360809	1.86889e-73	1.52101e-67
Neuron	ENSDARG00000091607	arhgef28b	0.831192	0.358553	0.601843	0.431373	0.265907	1.33547e-54	1.08688e-48
Neuron	ENSDARG00000062305	rims3	0.820177	0.385966	3.48015	0.470588	0.324325	3.30287e-66	2.68806e-60
Neuron	ENSDARG00000014420	elavl3	0.811799	0.33427	0.518312	0.411765	0.24318	4.39056e-50	3.57328e-44
Neuron	ENSDARG00000045639	elavl4	0.801656	0.503	1.37622	0.627451	0.379644	3.39234e-77	2.76088e-71
Neuron	ENSDARG00000089292	adgrl1a	0.674149	0.489088	7.00997	0.72549	0.331146	1.45863e-67	1.18711e-61
Neuron	ENSDARG00000061647	nrxn1a	0.660829	0.492382	3.00071	0.745098	0.3625	8.62407e-74	7.01875e-68
Neuron	ENSDARG00000113064	CR392045.1	0.653527	0.320357	5.61251	0.490196	0.216004	1.1099e-44	9.03301e-39
Neuron	ENSDARG00000069560	kcnh3	0.636915	0.274748	1.33022	0.431373	0.210765	1.22191e-43	9.94455e-38
Neuron	ENSDARG00000059340	dlgap2a	0.630899	0.346376	1.73027	0.54902	0.245284	1.67587e-50	1.36392e-44
Neuron	ENSDARG00000070567	cadpsb	0.62561	0.368006	0.971372	0.588235	0.254771	2.18121e-52	1.77519e-46
Neuron	ENSDARG00000102730	mapk10	0.624448	0.306102	0.667003	0.490196	0.197393	5.5801e-41	4.5414e-35
Neuron	ENSDARG00000009026	ank2a	0.62106	0.316619	0.707684	0.509804	0.211405	9.11791e-44	7.42066e-38
Neuron	ENSDARG00000086214	ntrk3b	0.607148	0.250002	1.04444	0.411765	0.165332	1.33839e-34	1.08926e-28
Neuron	ENSDARG00000021735	cacna1ba	0.601733	0.294967	1.03399	0.490196	0.209827	1.87731e-43	1.52786e-37
Neuron	ENSDARG00000079455	nlgn4xa	0.578232	0.37415	1.80807	0.647059	0.275199	1.90117e-56	1.54728e-50
Neuron	ENSDARG00000030614	syt1a	0.545325	0.395628	4.25845	0.72549	0.354084	4.0506e-72	3.29661e-66
Neuron	ENSDARG00000035056	fgf13a	0.53555	0.304528	1.26159	0.568627	0.210061	1.68693e-43	1.37292e-37
Neuron	ENSDARG00000010042	dnm1a	0.525788	0.329906	1.06165	0.627451	0.216395	9.28092e-45	7.55333e-39
Neuron	ENSDARG00000006383	stxbp5l	0.51441	0.302594	1.74279	0.588235	0.260399	1.65992e-53	1.35094e-47
Neuron	ENSDARG00000068910	nos1	0.498053	0.283206	3.09519	0.568627	0.313452	4.77306e-64	3.88458e-58
Neuron	ENSDARG00000071230	lrfn5a	0.49702	0.253383	1.21004	0.509804	0.184084	2.47952e-38	2.01797e-32
Neuron	ENSDARG00000079295	cacna1bb	0.483703	0.3035	1.72721	0.627451	0.259526	2.47529e-53	2.01453e-47
Neuron	ENSDARG00000058969	cntnap2a	0.467797	0.311864	3.05385	0.666667	0.198812	2.91369e-41	2.37133e-35
Neuron	ENSDARG00000074560	CHST8	0.444404	0.270128	2.5015	0.607843	0.181458	8.25848e-38	6.72122e-32
Neuron	ENSDARG00000068323	astn1	0.425117	0.250069	0.974997	0.588235	0.182462	5.2141e-38	4.24353e-32
Neuron	ENSDARG00000061099	nfasca	0.411421	0.266213	1.68701	0.647059	0.276261	1.16961e-56	9.51895e-51
Neuron	ENSDARG00000060637	clstn2	0.411013	0.249831	1.70024	0.607843	0.170643	1.17296e-35	9.54619e-30
Neuron	ENSDARG00000024785	ctnna2	0.308368	0.272089	3.27176	0.882353	0.240689	1.3732e-49	1.11758e-43
Pancreas	ENSDARG00000043171	cela1.4	0.980409	0.565621	1.50331	0.576923	0.484243	1.37918e-54	1.12245e-48
Pancreas	ENSDARG00000044204	endou	0.960627	0.295577	0.86083	0.307692	0.239781	6.91677e-28	5.62925e-22
Pancreas	ENSDARG00000043168	cela1.5	0.954771	0.403941	0.828693	0.423077	0.298551	2.58499e-34	2.10381e-28
Pancreas	ENSDARG00000030915	cpa1	0.946915	0.728396	2.86922	0.769231	0.611802	1.68625e-68	1.37236e-62
Pancreas	ENSDARG00000009153	pla2g1b	0.930803	0.572802	2.98738	0.615385	0.498195	4.14542e-56	3.37378e-50
Pancreas	ENSDARG00000052578	c6ast4	0.916255	0.422887	1.66943	0.461538	0.31404	5.24518e-36	4.26882e-30
Pancreas	ENSDARG00000021154	zgc:92040	0.914997	0.563075	1.64457	0.615385	0.438978	1.19787e-49	9.74892e-44
Pancreas	ENSDARG00000017490	cel.1	0.914991	0.598263	3.75438	0.653846	0.501359	1.8727e-56	1.52411e-50
Pancreas	ENSDARG00000068680	ctrl	0.91333	0.772818	8.44576	0.846154	0.700754	3.36753e-78	2.74069e-72
Pancreas	ENSDARG00000045835	si:dkey-14d8.6	0.908372	0.244562	0.688077	0.269231	0.194321	6.59727e-23	5.36923e-17
Pancreas	ENSDARG00000017314	cela1.6	0.899021	0.795288	9.00906	0.884615	0.722603	1.39614e-80	1.13626e-74
Pancreas	ENSDARG00000039730	zgc:112160	0.896257	0.586014	2.4357	0.653846	0.462438	3.30032e-52	2.68598e-46
Pancreas	ENSDARG00000060350	apoda.2	0.892934	0.549498	5.39808	0.615385	0.419263	1.6979e-47	1.38184e-41
Pancreas	ENSDARG00000090428	ctrb1	0.884027	0.816025	5.36345	0.923077	0.729437	2.51031e-81	2.04303e-75
Pancreas	ENSDARG00000074148	rbpjl	0.883156	0.305708	0.888594	0.346154	0.21703	2.14259e-25	1.74376e-19
Pancreas	ENSDARG00000013856	amy2a	0.88022	0.44011	2.30542	0.5	0.307531	2.69791e-35	2.19571e-29
Pancreas	ENSDARG00000007276	ela3l	0.877956	0.405211	2.18025	0.461538	0.29022	2.10404e-33	1.71239e-27
Pancreas	ENSDARG00000093844	zgc:136461	0.873626	0.268808	0.581931	0.307692	0.184844	7.22155e-22	5.8773e-16
Pancreas	ENSDARG00000045442	cpb1	0.863795	0.365452	1.1443	0.423077	0.271906	2.11548e-31	1.7217e-25
Pancreas	ENSDARG00000073742	prss59.2	0.860643	0.662033	4.08448	0.769231	0.525296	4.58512e-59	3.73163e-53
Pancreas	ENSDARG00000074547	si:ch211-240l19.8	0.859199	0.297415	0.669269	0.346154	0.214111	4.47351e-25	3.6408e-19
Pancreas	ENSDARG00000079274	prss59.1	0.857416	0.65955	2.50385	0.769231	0.496011	7.17557e-56	5.83988e-50
Pancreas	ENSDARG00000042993	prss1	0.848673	0.652825	5.06514	0.769231	0.532126	8.24867e-60	6.71323e-54
Pancreas	ENSDARG00000021339	cpa5	0.846839	0.553703	2.42827	0.653846	0.431891	7.10823e-49	5.78508e-43
Pancreas	ENSDARG00000056765	ela2l	0.840457	0.355578	1.5796	0.423077	0.263976	1.55871e-30	1.26857e-24
Pancreas	ENSDARG00000009443	zgc:92137	0.8309	0.319577	1.00617	0.384615	0.234953	2.33567e-27	1.9009e-21
Pancreas	ENSDARG00000013522	pck1	0.830277	0.51094	1.88981	0.615385	0.38984	2.76382e-44	2.24935e-38
Pancreas	ENSDARG00000056744	ela2	0.826146	0.254199	0.58673	0.307692	0.177566	4.54094e-21	3.69567e-15
Pancreas	ENSDARG00000029230	pnp4b	0.754039	0.348018	1.07547	0.461538	0.23648	1.58942e-27	1.29356e-21
Pancreas	ENSDARG00000013721	g6pca.2	0.74723	0.316136	1.20751	0.423077	0.239342	7.72718e-28	6.28881e-22
Periderm	ENSDARG00000097157	si:ch211-207n23.2	0.360594	0.19446	0.999097	0.539276	0.448345	0	0
Periderm	ENSDARG00000091996	tcnbb	0.36047	0.186907	1.42477	0.518509	0.396168	0	0
Periderm	ENSDARG00000017624	krt4	0.354452	0.34855	26.5387	0.983349	0.827657	0	0
Periderm	ENSDARG00000023082	krt1-19d	0.353038	0.181874	1.52699	0.515169	0.398401	0	0
Periderm	ENSDARG00000093494	si:ch211-217k17.9	0.348353	0.229887	1.81065	0.659925	0.532218	0	0
Periderm	ENSDARG00000006588	zgc:111983	0.346267	0.33717	8.90067	0.97373	0.847421	0	0
Periderm	ENSDARG00000093584	zgc:193505	0.336489	0.302832	4.20779	0.899976	0.718905	0	0
Periderm	ENSDARG00000103199	si:dkey-247k7.2	0.32492	0.276579	3.65727	0.851223	0.699957	0	0
Periderm	ENSDARG00000100582	si:ch211-195b11.3	0.324118	0.225815	1.63754	0.696707	0.549125	0	0
Periderm	ENSDARG00000105104	si:dkey-223p19.1	0.322619	0.21474	1.24315	0.665616	0.532017	0	0
Periderm	ENSDARG00000100095	anxa1b	0.317597	0.210621	1.511	0.66317	0.465565	0	0
Periderm	ENSDARG00000087093	si:ch211-157c3.4	0.31197	0.267779	3.40959	0.858349	0.665314	0	0
Periderm	ENSDARG00000094041	krt17	0.307818	0.281127	6.37847	0.913288	0.627302	0	0
Periderm	ENSDARG00000111240	dhrs13a.2	0.307081	0.249059	2.94262	0.811054	0.612735	0	0
Periderm	ENSDARG00000056836	si:ch211-125o16.4	0.305584	0.299353	10.5131	0.97961	0.826974	0	0
Periderm	ENSDARG00000060682	agr1	0.298703	0.230533	1.92534	0.771778	0.592756	0	0
Periderm	ENSDARG00000031588	si:dkey-239b22.1	0.297012	0.180687	1.08601	0.608349	0.454785	0	0
Periderm	ENSDARG00000092551	si:dkey-56e3.2	0.283082	0.211133	2.08105	0.745837	0.545418	0	0
Periderm	ENSDARG00000041433	si:dkey-7c18.24	0.278319	0.262714	6.70205	0.943932	0.728915	0	0
Periderm	ENSDARG00000007080	rhcgl1	0.263991	0.193014	1.81367	0.731138	0.528385	0	0
Periderm	ENSDARG00000043442	zgc:153665	0.259563	0.197975	2.1783	0.762723	0.500547	0	0
Periderm	ENSDARG00000021787	abcb5	0.251674	0.22057	5.99183	0.876411	0.615125	0	0
Periderm	ENSDARG00000004748	zgc:100868	0.246347	0.189343	2.15625	0.768603	0.567193	0	0
Periderm	ENSDARG00000042055	fam129aa	0.233289	0.193742	2.16897	0.83048	0.606624	0	0
Periderm	ENSDARG00000036588	mhc1zba	0.227522	0.179653	2.1889	0.789605	0.498955	0	0
Periderm	ENSDARG00000015709	hsd17b12a	0.225439	0.18025	1.89732	0.799553	0.510859	0	0
Periderm	ENSDARG00000101043	ppl	0.224207	0.220632	8.52352	0.984055	0.756572	0	0
Periderm	ENSDARG00000103917	znf185	0.210213	0.20482	6.121	0.974341	0.725957	0	0
Periderm	ENSDARG00000102146	si:ch211-69b7.6	0.203931	0.199302	14.0133	0.977305	0.664191	0	0
Periderm	ENSDARG00000019808	evpla	0.20346	0.201216	7.60308	0.98897	0.747807	0	0
PLL hair cell	ENSDARG00000030311	tmc2b	0.861589	0.40561	1.0352	0.470769	0.363163	0	0
PLL hair cell	ENSDARG00000057728	slc17a8	0.829617	0.537337	1.64018	0.647692	0.519669	0	0
PLL hair cell	ENSDARG00000020581	otofb	0.823272	0.76121	4.19796	0.924615	0.804003	0	0
PLL hair cell	ENSDARG00000077382	hcn5	0.804914	0.515145	1.26991	0.64	0.503375	0	0
PLL hair cell	ENSDARG00000074638	loxhd1b	0.756203	0.409513	1.45128	0.541538	0.389407	0	0
PLL hair cell	ENSDARG00000037790	pvalb8	0.751531	0.68794	9.31764	0.915385	0.770346	0	0
PLL hair cell	ENSDARG00000089780	si:dkey-288a3.2	0.748189	0.374095	0.80623	0.5	0.356443	0	0
PLL hair cell	ENSDARG00000044261	si:ch211-243g18.2	0.747344	0.379421	0.937336	0.507692	0.372592	0	0
PLL hair cell	ENSDARG00000078474	myo15ab	0.737163	0.411677	1.25906	0.558462	0.407903	0	0
PLL hair cell	ENSDARG00000008849	ptprq	0.716657	0.456456	1.54405	0.636923	0.43431	0	0
PLL hair cell	ENSDARG00000094454	cdh23	0.708529	0.614785	3.01871	0.867692	0.663738	0	0
PLL hair cell	ENSDARG00000062630	dnah9l	0.69712	0.428997	1.36684	0.615385	0.432347	0	0
PLL hair cell	ENSDARG00000079336	strc1	0.69057	0.40903	1.3825	0.592308	0.42049	0	0
PLL hair cell	ENSDARG00000087556	pacrg	0.680223	0.376739	1.0225	0.553846	0.355392	0	0
PLL hair cell	ENSDARG00000067537	pcsk5a	0.678099	0.485102	1.78106	0.715385	0.5188	0	0
PLL hair cell	ENSDARG00000095603	grid2ipb	0.669194	0.400487	1.28823	0.598462	0.399749	0	0
PLL hair cell	ENSDARG00000062693	nrxn3b	0.667545	0.64187	6.21492	0.961538	0.808931	0	0
PLL hair cell	ENSDARG00000058090	cfap57	0.659096	0.521192	2.2522	0.790769	0.537688	0	0
PLL hair cell	ENSDARG00000087373	dnah5	0.651251	0.559074	2.5125	0.858462	0.632791	0	0
PLL hair cell	ENSDARG00000098257	pcdh15a	0.651137	0.608062	4.76752	0.933846	0.682576	0	0
PLL hair cell	ENSDARG00000063433	atp2b2	0.641388	0.393714	1.73931	0.613846	0.414883	0	0
PLL hair cell	ENSDARG00000041776	ndst3	0.638733	0.399945	2.13571	0.626154	0.420052	0	0
PLL hair cell	ENSDARG00000007561	cdh23	0.618243	0.459402	1.76492	0.743077	0.492077	0	0
PLL hair cell	ENSDARG00000006892	myo3b	0.609512	0.437911	1.94522	0.718462	0.481282	0	0
PLL hair cell	ENSDARG00000052277	cabp2b	0.595365	0.376454	2.24664	0.632308	0.374719	0	0
PLL hair cell	ENSDARG00000104480	hcn1	0.593144	0.46904	4.95376	0.790769	0.529886	0	0
PLL hair cell	ENSDARG00000008127	pcdh15b	0.592384	0.508539	3.01903	0.858462	0.53751	0	0
PLL hair cell	ENSDARG00000061817	kif1aa	0.530781	0.449939	2.81559	0.847692	0.612279	0	0
PLL hair cell	ENSDARG00000012684	atp2b1a	0.525779	0.435992	3.20161	0.829231	0.492765	0	0
PLL hair cell	ENSDARG00000037122	TENM2	0.494723	0.372945	3.6795	0.753846	0.44783	0	0
PLL mantle cell	ENSDARG00000052027	tspan1	0.717866	0.181356	0.785564	0.252632	0.179099	0	0
PLL mantle cell	ENSDARG00000062319	si:dkey-103g5.3	0.665287	0.290392	1.8596	0.436491	0.316368	0	0
PLL mantle cell	ENSDARG00000079119	si:ch211-229d2.5	0.610561	0.116542	0.781741	0.190877	0.129116	0	0
PLL mantle cell	ENSDARG00000092552	fndc7rs2	0.594116	0.198872	0.671219	0.334737	0.235243	0	0
PLL mantle cell	ENSDARG00000019063	fat1b	0.579171	0.379611	2.5218	0.655439	0.43294	0	0
PLL mantle cell	ENSDARG00000092469	fndc7rs1	0.575199	0.194962	0.69042	0.338947	0.225925	0	0
PLL mantle cell	ENSDARG00000105061	si:ch73-261i21.5	0.555314	0.131327	1.16354	0.236491	0.153351	0	0
PLL mantle cell	ENSDARG00000075393	spock2	0.487575	0.141311	0.517414	0.289825	0.142199	0	0
PLL mantle cell	ENSDARG00000108006	CU693481.1	0.483387	0.176733	0.780116	0.365614	0.233686	0	0
PLL mantle cell	ENSDARG00000070522	cacna1i	0.406863	0.163316	1.25369	0.401404	0.20916	0	0
PLL mantle cell	ENSDARG00000089643	mcama	0.401838	0.173989	1.48943	0.432982	0.189016	0	0
PLL mantle cell	ENSDARG00000088315	si:ch211-103f14.3	0.369922	0.177043	1.55762	0.478596	0.272788	0	0
PLL mantle cell	ENSDARG00000058284	CT990561.1	0.368918	0.153521	1.21224	0.41614	0.199252	0	0
PLL mantle cell	ENSDARG00000099283	epb41a	0.349463	0.190549	1.54864	0.545263	0.273546	0	0
PLL mantle cell	ENSDARG00000075864	igsf9a	0.346124	0.227349	1.66128	0.656842	0.379492	0	0
PLL mantle cell	ENSDARG00000014259	eya1	0.307586	0.291181	7.15912	0.946667	0.556272	0	0
PLL mantle cell	ENSDARG00000099923	zgc:154054	0.304723	0.117399	0.908602	0.385263	0.117128	0	0
PLL mantle cell	ENSDARG00000000161	itsn2a	0.295101	0.147447	1.18309	0.499649	0.239662	0	0
PLL mantle cell	ENSDARG00000062854	sdk1b	0.289275	0.189399	2.14206	0.654737	0.254489	0	0
PLL mantle cell	ENSDARG00000043242	si:dkey-222f2.1	0.282204	0.12318	1.03719	0.436491	0.219416	0	0
PLL mantle cell	ENSDARG00000033498	rorb	0.281751	0.121005	1.62561	0.429474	0.208154	0	0
PLL mantle cell	ENSDARG00000077096	fndc7a	0.281457	0.116928	1.0882	0.415439	0.207109	0	0
PLL mantle cell	ENSDARG00000012397	eya4	0.27626	0.189214	1.95625	0.684912	0.317098	0	0
PLL mantle cell	ENSDARG00000012824	itga3b	0.265529	0.133417	1.03695	0.502456	0.158319	0	0
PLL mantle cell	ENSDARG00000090830	tmem132e	0.259681	0.168018	1.91116	0.647018	0.191626	0	0
PLL mantle cell	ENSDARG00000103479	ptprfa	0.251889	0.193733	2.76724	0.769123	0.272342	0	0
PLL mantle cell	ENSDARG00000077002	igsf3	0.248273	0.169	2.80707	0.680702	0.292436	0	0
PLL mantle cell	ENSDARG00000046150	b4galnt4a	0.246562	0.118177	1.13296	0.479298	0.190986	0	0
PLL mantle cell	ENSDARG00000052061	col4a6	0.226941	0.121035	1.40087	0.533333	0.109326	0	0
PLL mantle cell	ENSDARG00000101081	ptprub	0.181065	0.166834	5.00151	0.921404	0.289615	0	0
PLL support cell	ENSDARG00000100476	si:dkeyp-110c7.4	0.774305	0.41354	1.55505	0.534079	0.405506	0	0
PLL support cell	ENSDARG00000055014	si:dkey-33m11.8	0.763813	0.518274	1.84702	0.678535	0.525747	0	0
PLL support cell	ENSDARG00000086272	si:dkey-4p15.5	0.76196	0.676695	5.5595	0.888098	0.745507	0	0
PLL support cell	ENSDARG00000057408	CABZ01067232.1	0.755794	0.276022	0.738418	0.365209	0.26586	0	0
PLL support cell	ENSDARG00000087224	si:ch73-380n15.2	0.73412	0.549657	4.30761	0.748728	0.570225	0	0
PLL support cell	ENSDARG00000038891	AL954146.1	0.733975	0.502508	2.07072	0.684639	0.526382	0	0
PLL support cell	ENSDARG00000101702	chrna7	0.707855	0.344926	1.30112	0.487284	0.33822	0	0
PLL support cell	ENSDARG00000074666	zgc:153760	0.670607	0.187606	0.490231	0.279756	0.185051	0	0
PLL support cell	ENSDARG00000116457	zmp:0000001088	0.624373	0.436362	2.39021	0.698881	0.512095	0	0
PLL support cell	ENSDARG00000104431	slc1a3a	0.591818	0.543654	6.62301	0.918616	0.647329	0	0
PLL support cell	ENSDARG00000035694	stm	0.586616	0.186786	0.886813	0.318413	0.201214	0	0
PLL support cell	ENSDARG00000069296	moxd1l	0.570435	0.313362	1.11118	0.549339	0.362615	0	0
PLL support cell	ENSDARG00000076462	ndnfl	0.512201	0.255319	1.16772	0.498474	0.294578	0	0
PLL support cell	ENSDARG00000096721	si:rp71-1c10.11	0.479197	0.199381	0.855812	0.416073	0.250004	0	0
PLL support cell	ENSDARG00000077096	fndc7a	0.454478	0.323636	2.01987	0.712106	0.438558	0	0
PLL support cell	ENSDARG00000074317	fam20ca	0.450342	0.207533	1.16082	0.460834	0.219346	0	0
PLL support cell	ENSDARG00000033498	rorb	0.440992	0.326594	2.90273	0.74059	0.442779	0	0
PLL support cell	ENSDARG00000043242	si:dkey-222f2.1	0.428575	0.291239	1.78326	0.679552	0.401833	0	0
PLL support cell	ENSDARG00000088315	si:ch211-103f14.3	0.411917	0.26232	1.78747	0.636826	0.35382	0	0
PLL support cell	ENSDARG00000100244	ebf3a	0.410502	0.328652	6.95996	0.80061	0.437703	0	0
PLL support cell	ENSDARG00000075334	arhgap32a	0.386408	0.211876	1.23749	0.548321	0.322023	0	0
PLL support cell	ENSDARG00000060609	cd109	0.385429	0.282308	2.1932	0.732452	0.453831	0	0
PLL support cell	ENSDARG00000028618	krt18b	0.377007	0.276906	2.10984	0.734486	0.364678	0	0
PLL support cell	ENSDARG00000105088	tenm4	0.329394	0.24227	3.3139	0.735504	0.297427	0	0
PLL support cell	ENSDARG00000040291	cadm4	0.31305	0.311139	17.6784	0.993896	0.605276	0	0
PLL support cell	ENSDARG00000039966	prom1a	0.298849	0.201868	1.91463	0.675483	0.352804	0	0
PLL support cell	ENSDARG00000014259	eya1	0.288407	0.275791	6.57702	0.956256	0.492234	0	0
PLL support cell	ENSDARG00000103648	znf536	0.260638	0.232268	7.87741	0.89115	0.358079	0	0
PLL support cell	ENSDARG00000015449	fut8a	0.257831	0.210881	3.39496	0.817904	0.346111	0	0
PLL support cell	ENSDARG00000101081	ptprub	0.21779	0.208263	6.38316	0.956256	0.34397	0	0
PN/Schwann Cell	ENSDARG00000034588	scn4ab	0.547111	0.234476	2.6012	0.428571	0.215128	0	0
PN/Schwann Cell	ENSDARG00000061576	gldn	0.494028	0.119096	0.540758	0.241071	0.162236	1.57816e-296	1.28439e-290
PN/Schwann Cell	ENSDARG00000100360	si:ch211-125c23.3	0.45448	0.148112	0.991191	0.325893	0.212287	0	0
PN/Schwann Cell	ENSDARG00000036186	mbpa	0.434537	0.216622	4.47039	0.498512	0.346048	0	0
PN/Schwann Cell	ENSDARG00000103109	chl1b	0.432106	0.151109	1.34654	0.349702	0.163519	7.22078e-299	5.87668e-293
PN/Schwann Cell	ENSDARG00000104023	mag	0.406223	0.10216	0.655903	0.251488	0.163416	1.11417e-298	9.06775e-293
PN/Schwann Cell	ENSDARG00000078898	pcdh7a	0.405869	0.121398	1.12431	0.299107	0.121318	5.09378e-222	4.14561e-216
PN/Schwann Cell	ENSDARG00000071460	si:ch211-234p6.5	0.403375	0.111648	0.605772	0.276786	0.123914	9.64304e-227	7.84805e-221
PN/Schwann Cell	ENSDARG00000018065	ntm	0.396533	0.250194	4.76695	0.630952	0.333806	0	0
PN/Schwann Cell	ENSDARG00000011602	si:dkeyp-117h8.2	0.375489	0.0905196	0.540157	0.241071	0.120351	2.92757e-220	2.38262e-214
PN/Schwann Cell	ENSDARG00000078222	aatka	0.309714	0.0990901	0.651104	0.31994	0.144459	3.86534e-264	3.14583e-258
PN/Schwann Cell	ENSDARG00000104786	nlgn3a	0.299634	0.0940814	0.889656	0.313988	0.14938	4.22025e-273	3.43467e-267
PN/Schwann Cell	ENSDARG00000044569	cldn19	0.296259	0.132258	1.48969	0.446429	0.150933	6.25482e-276	5.09052e-270
PN/Schwann Cell	ENSDARG00000088630	arhgef10la	0.29256	0.172837	1.9034	0.590774	0.266658	0	0
PN/Schwann Cell	ENSDARG00000077329	nlgn2a	0.275104	0.0867888	1.10073	0.315476	0.091228	2.52097e-167	2.05171e-161
PN/Schwann Cell	ENSDARG00000010018	qki2	0.26293	0.145159	2.85597	0.552083	0.175154	0	0
PN/Schwann Cell	ENSDARG00000004621	gpm6ab	0.253324	0.15305	1.78087	0.604167	0.253909	0	0
PN/Schwann Cell	ENSDARG00000043313	ank2b	0.25118	0.189133	3.25081	0.752976	0.259789	0	0
PN/Schwann Cell	ENSDARG00000089413	mbpb	0.235579	0.0834343	1.08566	0.354167	0.0742556	1.66144e-136	1.35217e-130
PN/Schwann Cell	ENSDARG00000014003	stard8	0.233312	0.118392	1.10828	0.50744	0.147336	2.22356e-269	1.80966e-263
PN/Schwann Cell	ENSDARG00000002026	qkib	0.218174	0.123048	1.3732	0.563988	0.174703	0	0
PN/Schwann Cell	ENSDARG00000116871	BX284638.1	0.209754	0.103316	1.34318	0.49256	0.141713	3.86899e-259	3.1488e-253
PN/Schwann Cell	ENSDARG00000006025	tp53i11b	0.20331	0.104378	2.01683	0.513393	0.141237	2.85414e-258	2.32286e-252
PN/Schwann Cell	ENSDARG00000078416	zeb2b	0.200333	0.0971852	1.74311	0.485119	0.089419	4.86924e-164	3.96286e-158
PN/Schwann Cell	ENSDARG00000003512	anks1b	0.195273	0.0903717	1.70509	0.462798	0.0909473	8.15665e-167	6.63834e-161
PN/Schwann Cell	ENSDARG00000059738	ptprsa	0.174766	0.102467	1.53456	0.58631	0.104361	3.45767e-191	2.81405e-185
PN/Schwann Cell	ENSDARG00000103648	znf536	0.155644	0.120671	3.98871	0.775298	0.18899	0	0
PN/Schwann Cell	ENSDARG00000024276	pcbp4	0.145759	0.108669	3.08474	0.745536	0.204325	0	0
PN/Schwann Cell	ENSDARG00000076564	hspg2	0.134494	0.0880618	2.18619	0.654762	0.0741258	2.85797e-136	2.32598e-130
PN/Schwann Cell	ENSDARG00000062123	agap1	0.128953	0.102856	3.05701	0.797619	0.14513	2.31819e-265	1.88668e-259
pre-SFC	ENSDARG00000016718	mmp11b	0.347464	0.101529	1.42814	0.292198	0.140426	0	0
pre-SFC	ENSDARG00000098203	APCDD1	0.342139	0.159512	1.04598	0.46622	0.249264	0	0
pre-SFC	ENSDARG00000079752	col6a4a	0.324605	0.123704	0.953361	0.381092	0.204127	0	0
pre-SFC	ENSDARG00000051823	hyal4	0.323167	0.109164	0.855572	0.337795	0.178739	0	0
pre-SFC	ENSDARG00000008060	scara3	0.293587	0.128586	0.883886	0.437984	0.230663	0	0
pre-SFC	ENSDARG00000102478	ADAMTS7	0.271708	0.186348	2.86786	0.68584	0.350902	0	0
pre-SFC	ENSDARG00000074082	gpc5c	0.265838	0.125552	1.24051	0.472286	0.201114	0	0
pre-SFC	ENSDARG00000093413	edil3a	0.265601	0.16716	3.75597	0.629366	0.274239	0	0
pre-SFC	ENSDARG00000038428	sulf1	0.250645	0.135913	2.28941	0.542251	0.225448	0	0
pre-SFC	ENSDARG00000059233	runx2b	0.247558	0.182782	3.92398	0.738339	0.294651	0	0
pre-SFC	ENSDARG00000020957	pth1ra	0.239742	0.152841	2.37204	0.637524	0.246762	0	0
pre-SFC	ENSDARG00000078416	zeb2b	0.23638	0.133937	2.16966	0.566618	0.303456	0	0
pre-SFC	ENSDARG00000036571	sema3e	0.235209	0.154354	2.19083	0.656243	0.287799	0	0
pre-SFC	ENSDARG00000116937	BX927333.1	0.227317	0.120148	1.70456	0.528551	0.222961	0	0
pre-SFC	ENSDARG00000028661	cntfr	0.223767	0.167393	18.1007	0.748065	0.223383	0	0
pre-SFC	ENSDARG00000070494	pdgfra	0.22107	0.105957	1.059	0.479293	0.200183	0	0
pre-SFC	ENSDARG00000062510	bcl11ba	0.220134	0.118585	1.96547	0.538695	0.165032	0	0
pre-SFC	ENSDARG00000016404	ptch1	0.216922	0.136841	1.6737	0.63083	0.236864	0	0
pre-SFC	ENSDARG00000040261	runx2a	0.216363	0.156423	6.01797	0.722966	0.213341	0	0
pre-SFC	ENSDARG00000038672	tcf7	0.215298	0.11312	1.87187	0.525413	0.170451	0	0
pre-SFC	ENSDARG00000069954	kcnq5a	0.212272	0.133308	4.39204	0.628007	0.239577	0	0
pre-SFC	ENSDARG00000079850	dchs1b	0.202507	0.113685	1.64993	0.561389	0.234688	0	0
pre-SFC	ENSDARG00000102464	wnt5b	0.195613	0.103412	2.06713	0.528655	0.130151	0	0
pre-SFC	ENSDARG00000004782	fgfr3	0.190382	0.120756	2.11581	0.634282	0.169887	0	0
pre-SFC	ENSDARG00000062338	zeb2a	0.188475	0.131589	2.45296	0.69818	0.280684	0	0
pre-SFC	ENSDARG00000062020	gse1	0.184972	0.156497	4.82165	0.846057	0.318811	0	0
pre-SFC	ENSDARG00000099979	tgfbr3	0.183316	0.162074	6.23031	0.884125	0.340442	0	0
pre-SFC	ENSDARG00000069356	adgrl2a	0.18049	0.105516	1.39461	0.584606	0.225345	0	0
pre-SFC	ENSDARG00000015176	ror1	0.17493	0.0995941	1.5818	0.569337	0.208214	0	0
pre-SFC	ENSDARG00000021442	cdh11	0.155827	0.107736	2.88913	0.691383	0.203797	0	0
Schwann Cell	ENSDARG00000011929	plp1b	0.480729	0.147917	0.701641	0.307692	0.126529	1.85193e-15	1.50721e-09
Schwann Cell	ENSDARG00000060680	si:ch73-127m5.1	0.454861	0.157452	0.454927	0.346154	0.132569	4.00324e-16	3.25806e-10
Schwann Cell	ENSDARG00000104023	mag	0.434055	0.200333	0.713083	0.461538	0.160347	3.52832e-19	2.87155e-13
Schwann Cell	ENSDARG00000090615	cd59	0.41232	0.111009	0.31999	0.269231	0.0862963	5.1686e-11	4.20649e-05
Schwann Cell	ENSDARG00000038609	mpz	0.410421	0.142069	0.874638	0.346154	0.11082	1.00034e-13	8.1413e-08
Schwann Cell	ENSDARG00000036186	mbpa	0.402013	0.340165	4.05216	0.846154	0.333834	3.60751e-38	2.93599e-32
Schwann Cell	ENSDARG00000110077	CU929402.2	0.347662	0.106973	0.398812	0.307692	0.089549	2.25291e-11	1.83354e-05
Schwann Cell	ENSDARG00000061576	gldn	0.34002	0.104621	0.337393	0.307692	0.0914855	1.3746e-11	1.11872e-05
Schwann Cell	ENSDARG00000100360	si:ch211-125c23.3	0.330618	0.152593	0.659914	0.461538	0.143198	2.70783e-17	2.20378e-11
Schwann Cell	ENSDARG00000044569	cldn19	0.323951	0.261652	1.67533	0.807692	0.208579	1.80624e-24	1.47002e-18
Schwann Cell	ENSDARG00000078222	aatka	0.247628	0.123814	0.484566	0.5	0.121245	7.07963e-15	5.7618e-09
Schwann Cell	ENSDARG00000014003	stard8	0.240032	0.13848	1.15073	0.576923	0.105217	4.15962e-13	3.38533e-07
Schwann Cell	ENSDARG00000089413	mbpb	0.232608	0.143143	1.06757	0.615385	0.0970293	3.34483e-12	2.72221e-06
Schwann Cell	ENSDARG00000018065	ntm	0.230688	0.124217	2.34322	0.538462	0.138726	8.40758e-17	6.84256e-11
Schwann Cell	ENSDARG00000010018	qki2	0.217199	0.183783	2.21777	0.846154	0.175196	8.26555e-21	6.72697e-15
Schwann Cell	ENSDARG00000069888	cldna	0.216584	0.108292	0.738264	0.5	0.0374359	1.52917e-05	1
Schwann Cell	ENSDARG00000078185	pacs2	0.214315	0.156615	1.23414	0.730769	0.14328	2.65217e-17	2.15848e-11
Schwann Cell	ENSDARG00000101419	drp2	0.209663	0.129023	1.37423	0.615385	0.144728	1.83814e-17	1.49598e-11
Schwann Cell	ENSDARG00000088630	arhgef10la	0.201542	0.139529	1.1627	0.692308	0.165169	1.04231e-19	8.48293e-14
Schwann Cell	ENSDARG00000002026	qkib	0.192936	0.12615	1.16724	0.653846	0.122733	4.85265e-15	3.94936e-09
Schwann Cell	ENSDARG00000005368	mcamb	0.187443	0.11535	0.730112	0.615385	0.127844	1.32669e-15	1.07973e-09
Schwann Cell	ENSDARG00000074244	arhgef10lb	0.186969	0.115058	1.27618	0.615385	0.0579062	7.51322e-08	0.0611468
Schwann Cell	ENSDARG00000078309	fam83b	0.175992	0.128609	1.86491	0.730769	0.0330242	4.87304e-05	1
Schwann Cell	ENSDARG00000077881	chl1a	0.172751	0.112952	1.80812	0.653846	0.0406505	6.59675e-06	1
Schwann Cell	ENSDARG00000037455	ugt8	0.160494	0.117284	1.38186	0.730769	0.0991693	1.93915e-12	1.57819e-06
Schwann Cell	ENSDARG00000058371	krt5	0.155622	0.155622	23.9391	1	0.0159158	0.00480785	1
Schwann Cell	ENSDARG00000067976	ar	0.138941	0.112221	2.44926	0.807692	0.0409594	6.08558e-06	1
Schwann Cell	ENSDARG00000036830	krt91	0.130406	0.110344	12.8275	0.846154	0.00631827	0.0756448	1
Schwann Cell	ENSDARG00000098024	si:dkey-262k9.2	0.125476	0.106172	3.57226	0.846154	0.036616	1.8958e-05	1
Schwann Cell	ENSDARG00000022309	dspa	0.124968	0.120162	2.94595	0.961538	0.0312999	7.68013e-05	1
SFC	ENSDARG00000105153	ifitm5	0.60267	0.23393	0.669941	0.388156	0.283151	0	0
SFC	ENSDARG00000054753	col10a1a	0.597071	0.488666	13.9928	0.818439	0.563895	0	0
SFC	ENSDARG00000039964	fgfbp2a	0.593314	0.233572	1.4164	0.393674	0.275069	0	0
SFC	ENSDARG00000004627	panx3	0.587803	0.457663	3.29677	0.7786	0.604991	0	0
SFC	ENSDARG00000012422	col11a2	0.555874	0.367565	2.39721	0.661238	0.483072	0	0
SFC	ENSDARG00000022437	cd81b	0.55416	0.39813	2.0804	0.718439	0.543781	0	0
SFC	ENSDARG00000052633	si:ch211-106n13.3	0.548389	0.42609	5.0644	0.776985	0.580467	0	0
SFC	ENSDARG00000024847	col5a2b	0.546104	0.385727	1.83377	0.706326	0.520205	0	0
SFC	ENSDARG00000052520	sgms2a	0.516962	0.246375	0.883525	0.476581	0.328015	0	0
SFC	ENSDARG00000037145	slc8a4b	0.515435	0.44641	6.17967	0.866083	0.661872	0	0
SFC	ENSDARG00000098226	smpd3	0.509918	0.362501	2.21663	0.710902	0.529409	0	0
SFC	ENSDARG00000008403	phospho1	0.498379	0.208742	0.618588	0.418843	0.290474	0	0
SFC	ENSDARG00000101592	prp	0.483617	0.434344	4.72142	0.898116	0.663451	0	0
SFC	ENSDARG00000079572	plcd3b	0.470198	0.222505	0.807897	0.473217	0.322534	0	0
SFC	ENSDARG00000092730	enam	0.464495	0.264694	5.04726	0.569852	0.287415	0	0
SFC	ENSDARG00000002507	itga10	0.447196	0.282401	1.50493	0.631494	0.417686	0	0
SFC	ENSDARG00000061977	ppfibp2a	0.426129	0.334996	4.7351	0.786137	0.493075	0	0
SFC	ENSDARG00000025089	loxl4	0.425528	0.34111	3.35755	0.801615	0.535242	0	0
SFC	ENSDARG00000019516	sp7	0.418087	0.284108	1.5852	0.679542	0.435032	0	0
SFC	ENSDARG00000015731	ano5a	0.398214	0.27323	1.68762	0.686137	0.445192	0	0
SFC	ENSDARG00000061885	satb2	0.397151	0.267315	2.44692	0.673082	0.374334	0	0
SFC	ENSDARG00000103638	CR936977.2	0.389551	0.260784	2.04304	0.669448	0.411644	0	0
SFC	ENSDARG00000023542	cdh7a	0.384553	0.236528	1.88536	0.615074	0.331794	0	0
SFC	ENSDARG00000033327	unc5b	0.362079	0.244001	2.62589	0.67389	0.382703	0	0
SFC	ENSDARG00000096546	nrp2a	0.328571	0.262282	3.38003	0.79825	0.491475	0	0
SFC	ENSDARG00000020957	pth1ra	0.300248	0.252321	3.19367	0.840377	0.413232	0	0
SFC	ENSDARG00000040261	runx2a	0.283738	0.268692	8.61424	0.946972	0.470223	0	0
SFC	ENSDARG00000007172	plxna3	0.249895	0.218785	5.2883	0.875505	0.45998	0	0
SFC	ENSDARG00000021442	cdh11	0.24676	0.230652	5.29908	0.934724	0.480109	0	0
SFC	ENSDARG00000052826	runx3	0.231431	0.215016	5.72536	0.929071	0.422222	0	0
Suprabasal Cell	ENSDARG00000069888	cldna	0.360568	0.219594	1.44465	0.609021	0.444574	0	0
Suprabasal Cell	ENSDARG00000039579	cfd	0.287749	0.199345	2.57002	0.692773	0.322088	0	0
Suprabasal Cell	ENSDARG00000090268	krtt1c19e	0.249948	0.168583	4.44395	0.674475	0.21957	0	0
Suprabasal Cell	ENSDARG00000058371	krt5	0.240553	0.236903	42.5249	0.984828	0.301649	0	0
Suprabasal Cell	ENSDARG00000009018	rhbg	0.238123	0.108907	0.938948	0.457355	0.185573	0	0
Suprabasal Cell	ENSDARG00000009544	cldnb	0.228949	0.173173	2.34924	0.756381	0.221998	0	0
Suprabasal Cell	ENSDARG00000036830	krt91	0.20323	0.196001	22.9657	0.964428	0.169095	0	0
Suprabasal Cell	ENSDARG00000043587	srd5a2a	0.199282	0.109743	0.882673	0.550692	0.199357	0	0
Suprabasal Cell	ENSDARG00000003808	aqp3a	0.195164	0.128522	1.47128	0.658534	0.251273	0	0
Suprabasal Cell	ENSDARG00000054609	slco2b1	0.170404	0.123633	1.9161	0.725525	0.265804	0	0
Suprabasal Cell	ENSDARG00000110019	CABZ01079267.1	0.164651	0.0961235	1.09162	0.583803	0.0881469	0	0
Suprabasal Cell	ENSDARG00000078309	fam83b	0.162589	0.116446	1.68043	0.716197	0.162114	0	0
Suprabasal Cell	ENSDARG00000074244	arhgef10lb	0.162455	0.0908033	1.06065	0.558944	0.232685	0	0
Suprabasal Cell	ENSDARG00000116617	spaca4l	0.158285	0.118564	1.71113	0.749052	0.113659	0	0
Suprabasal Cell	ENSDARG00000098024	si:dkey-262k9.2	0.156381	0.14483	4.76178	0.92614	0.365812	0	0
Suprabasal Cell	ENSDARG00000077881	chl1a	0.151048	0.100562	1.51595	0.665761	0.190163	0	0
Suprabasal Cell	ENSDARG00000040534	epcam	0.149867	0.0932233	1.26829	0.62204	0.067064	0	0
Suprabasal Cell	ENSDARG00000067976	ar	0.146547	0.109185	2.62588	0.745054	0.195647	0	0
Suprabasal Cell	ENSDARG00000018923	fat2	0.14454	0.0918504	1.22374	0.635469	0.201805	0	0
Suprabasal Cell	ENSDARG00000037746	actb1	0.135949	0.0926696	2.32047	0.68165	0.0321037	0	0
Suprabasal Cell	ENSDARG00000096359	eppk1	0.135827	0.0931924	1.9865	0.68611	0.0894851	0	0
Suprabasal Cell	ENSDARG00000061764	ahnak	0.135329	0.134226	28.3628	0.99185	0.290288	0	0
Suprabasal Cell	ENSDARG00000022309	dspa	0.13223	0.114649	3.17053	0.867043	0.129821	0	0
Suprabasal Cell	ENSDARG00000063572	perp	0.12268	0.111506	3.69728	0.908919	0.0878484	0	0
Suprabasal Cell	ENSDARG00000039677	dsc2l	0.117895	0.0947208	2.58098	0.803434	0.0600844	0	0
Suprabasal Cell	ENSDARG00000051861	pkp3a	0.115902	0.109065	4.53769	0.941005	0.116707	0	0
Suprabasal Cell	ENSDARG00000030107	si:ch211-207i1.2	0.112605	0.0862574	1.99936	0.766017	0.139022	0	0
Suprabasal Cell	ENSDARG00000086034	nectin1b	0.112503	0.0885549	2.73968	0.787135	0.203463	0	0
Suprabasal Cell	ENSDARG00000070787	jupa	0.104974	0.0870679	2.59416	0.829421	0.061145	0	0
Suprabasal Cell	ENSDARG00000063905	mt-co1	0.10491	0.0851647	3.93125	0.811789	0.0426639	0	0
Unknown	ENSDARG00000089709	gfral	0.707353	0.197444	0.604804	0.27913	0.185204	0	0
Unknown	ENSDARG00000115573	CR759836.1	0.700888	0.188935	0.671662	0.269565	0.169589	0	0
Unknown	ENSDARG00000043074	grp	0.69901	0.195723	0.694362	0.28	0.185811	0	0
Unknown	ENSDARG00000078428	si:ch211-256e16.4	0.696871	0.167249	0.535445	0.24	0.159941	0	0
Unknown	ENSDARG00000096821	si:ch211-256e16.7	0.687655	0.060394	0.142777	0.0878261	0.0566605	3.44258e-160	2.80176e-154
Unknown	ENSDARG00000076534	si:ch211-14a17.10	0.664982	0.0803761	0.649524	0.12087	0.072427	2.4823e-204	2.02023e-198
Unknown	ENSDARG00000111812	CABZ01073083.1	0.66438	0.196425	0.726979	0.295652	0.19636	0	0
Unknown	ENSDARG00000115752	CABZ01028768.1	0.663377	0.0657608	0.17317	0.0991304	0.058051	4.42574e-164	3.60192e-158
Unknown	ENSDARG00000052426	si:ch211-256e16.3	0.500557	0.0940176	0.438919	0.187826	0.088706	5.80592e-250	4.72518e-244
Unknown	ENSDARG00000040608	gcnt7	0.405743	0.0617435	0.273767	0.152174	0.0704911	6.56802e-199	5.34542e-193
Unknown	ENSDARG00000053583	cers6	0.383626	0.0837306	0.416053	0.218261	0.0943224	1.01615e-265	8.26999e-260
Unknown	ENSDARG00000030832	otofa	0.380981	0.129202	0.84952	0.33913	0.17271	0	0
Unknown	ENSDARG00000075292	myo15aa	0.373513	0.130892	1.04441	0.350435	0.190993	0	0
Unknown	ENSDARG00000025106	ppp3cb	0.352562	0.0640743	0.346071	0.181739	0.075166	5.26233e-212	4.28278e-206
Unknown	ENSDARG00000055305	ret	0.280154	0.0730836	0.553091	0.26087	0.122826	0	0
Unknown	ENSDARG00000061741	itpr3	0.272651	0.130873	1.87454	0.48	0.143144	0	0
Unknown	ENSDARG00000088227	tmem163b	0.260053	0.0587945	0.439206	0.226087	0.0634943	2.57048e-179	2.092e-173
Unknown	ENSDARG00000076689	gramd1a	0.245684	0.119424	1.5075	0.486087	0.119108	0	0
Unknown	ENSDARG00000098769	slitrk6	0.243351	0.0979752	1.21935	0.402609	0.100184	3.58162e-282	2.91492e-276
Unknown	ENSDARG00000076404	mctp1a	0.211868	0.0935903	1.23929	0.441739	0.149499	0	0
Unknown	ENSDARG00000091006	cobl	0.208817	0.0860689	1.34146	0.412174	0.0875174	1.25126e-246	1.01834e-240
Unknown	ENSDARG00000040606	tfap2c	0.150237	0.0870071	1.50919	0.57913	0.0368676	7.77382e-105	6.32677e-99
Unknown	ENSDARG00000052387	pou2f3	0.148305	0.0816321	1.34057	0.550435	0.13142	0	0
Unknown	ENSDARG00000041339	zgc:92380	0.134127	0.0590161	0.786806	0.44	0.0851172	6.73747e-240	5.48333e-234
Unknown	ENSDARG00000014746	rbfox1	0.126811	0.063626	1.67589	0.501739	0.047128	1.59614e-133	1.29902e-127
Unknown	ENSDARG00000056206	camk2g2	0.125028	0.0682761	1.15157	0.546087	0.0724356	2.348e-204	1.91093e-198
Unknown	ENSDARG00000036558	col18a1a	0.12251	0.0643446	2.26158	0.525217	0.021713	1.77878e-62	1.44767e-56
Unknown	ENSDARG00000069946	itga6b	0.118856	0.0726569	3.15626	0.611304	0.0151616	3.73567e-44	3.0403e-38
Unknown	ENSDARG00000028507	itgb4	0.117711	0.0833191	5.00294	0.707826	0.0199643	1.37767e-57	1.12123e-51
Xanthophore	ENSDARG00000075191	oacyl	0.743971	0.309572	1.09241	0.416107	0.29877	0	0
Xanthophore	ENSDARG00000058553	sprb	0.742256	0.285818	1.21976	0.385067	0.273778	0	0
Xanthophore	ENSDARG00000076844	plin6	0.735096	0.511853	3.03249	0.696309	0.517975	0	0
Xanthophore	ENSDARG00000025912	bscl2l	0.729951	0.458669	1.51021	0.628356	0.462998	0	0
Xanthophore	ENSDARG00000071475	aox5	0.721738	0.448664	1.63527	0.621644	0.463964	0	0
Xanthophore	ENSDARG00000063288	slc2a11b	0.710834	0.602301	3.33136	0.847315	0.665234	0	0
Xanthophore	ENSDARG00000056028	slc22a7a	0.699308	0.466988	1.73256	0.667785	0.510818	0	0
Xanthophore	ENSDARG00000075803	slc41a2a	0.69761	0.22883	0.532139	0.32802	0.22814	0	0
Xanthophore	ENSDARG00000114516	CABZ01021592.1	0.664273	0.37449	1.83853	0.563758	0.367875	0	0
Xanthophore	ENSDARG00000101557	scarb1	0.603213	0.440771	2.05489	0.730705	0.482219	0	0
Xanthophore	ENSDARG00000070818	pax7b	0.565376	0.520317	9.95622	0.920302	0.670522	0	0
Xanthophore	ENSDARG00000062297	soat1	0.561013	0.272035	1.07015	0.484899	0.279488	0	0
Xanthophore	ENSDARG00000070110	opn5	0.551556	0.243388	0.784381	0.441275	0.277137	0	0
Xanthophore	ENSDARG00000104256	bco1	0.524368	0.351925	2.36809	0.671141	0.414919	0	0
Xanthophore	ENSDARG00000102986	csf1ra	0.517708	0.383069	2.48302	0.739933	0.440971	0	0
Xanthophore	ENSDARG00000100398	pax7a	0.493893	0.403567	7.33365	0.817114	0.482162	0	0
Xanthophore	ENSDARG00000109358	trhde.2	0.454776	0.218613	1.45464	0.480705	0.232003	0	0
Xanthophore	ENSDARG00000029894	slc2a15a	0.437394	0.251722	1.38585	0.575503	0.313294	0	0
Xanthophore	ENSDARG00000053269	slc2a15b	0.429124	0.225722	1.20631	0.526007	0.308065	0	0
Xanthophore	ENSDARG00000076250	rasef	0.417655	0.261034	1.43049	0.625	0.380778	0	0
Xanthophore	ENSDARG00000058699	tmeff2b	0.41573	0.372483	5.96506	0.895973	0.556207	0	0
Xanthophore	ENSDARG00000031348	mc5ra	0.392853	0.259375	2.61628	0.660235	0.364864	0	0
Xanthophore	ENSDARG00000061635	myo5aa	0.375564	0.318852	3.25848	0.848993	0.459092	0	0
Xanthophore	ENSDARG00000103476	trpm1b	0.364155	0.331161	4.62155	0.909396	0.528164	0	0
Xanthophore	ENSDARG00000102908	il16	0.358354	0.230585	1.68443	0.643456	0.315501	0	0
Xanthophore	ENSDARG00000070991	mlpha	0.357409	0.214086	1.45187	0.598993	0.31707	0	0
Xanthophore	ENSDARG00000088168	ablim3	0.346284	0.262618	2.52317	0.758389	0.419673	0	0
Xanthophore	ENSDARG00000062415	ctnnd2a	0.34381	0.222092	2.43998	0.645973	0.347472	0	0
Xanthophore	ENSDARG00000101145	lipeb	0.333676	0.214706	2.30344	0.643456	0.247865	0	0
Xanthophore	ENSDARG00000109783	igsf11	0.277557	0.251245	4.61262	0.905201	0.418779	0	0

## Sheet: Table_3
Signature	Gene Symbol
epithelial	kremen1
epithelial	cdh11
epithelial	cobl
epithelial	col11a1a
migratory	zeb2a
migratory	zeb2b
migratory	hdac4
migratory	loxl2b
migratory	snai2
migratory	pdgfra

## Sheet: Table_4
Cell Type	Up In	ENSEMBL ID	Gene Symbol	Gene Name	q-value	estimate	Class	Family
Basal Cell	hypoTH	ENSDARG00000001910	rorab	RAR-related orphan receptor A, paralog b	0	1.53382	TF	THR-like
Basal Cell	hypoTH	ENSDARG00000019601	col12a1b	collagen, type XII, alpha 1b	0	1.84428
Basal Cell	hypoTH	ENSDARG00000026165	col11a1a	collagen, type XI, alpha 1a	0	2.23468	Ligand
Basal Cell	hypoTH	ENSDARG00000028507	itgb4	integrin, beta 4	0	0.468054	Receptor
Basal Cell	hypoTH	ENSDARG00000036036	mdka	midkine a	0	1.70383	Ligand
Basal Cell	hypoTH	ENSDARG00000051748	ccnd2a	cyclin D2, a	0	0.722082
Basal Cell	hypoTH	ENSDARG00000055192	zgc:136930	zgc:136930	0	3.06963
Basal Cell	hypoTH	ENSDARG00000056248	si:dkey-183i3.5	si:dkey-183i3.5	0	3.0957
Basal Cell	hypoTH	ENSDARG00000067567	SLC6A13		0	1.53614
Basal Cell	hypoTH	ENSDARG00000069415	col17a1a	collagen, type XVII, alpha 1a	0	1.70306	Receptor
Basal Cell	hypoTH	ENSDARG00000076060	diaph2	diaphanous-related formin 2	0	0.676285
Basal Cell	hypoTH	ENSDARG00000076120	foxp4	forkhead box P4	0	0.707985	TF	Fork_head
Basal Cell	hypoTH	ENSDARG00000090268	krtt1c19e	keratin type 1 c19e	0	1.66333
Basal Cell	hypoTH	ENSDARG00000098349	hdac4	histone deacetylase 4	0	0.843717	TF-cofactor	Histone deacetylase
Basal Cell	hypoTH	ENSDARG00000101199	rbp4	retinol binding protein 4, plasma	0	1.16084	Ligand
Basal Cell	hypoTH	ENSDARG00000115956	CABZ01044281.1		0	2.08764
Basal Cell	hypoTH	ENSDARG00000016439	slc7a1		0	1.07802
Basal Cell	hypoTH	ENSDARG00000027867	paplna	papilin a, proteoglycan-like sulfated glycoprotein	0	0.748991
Basal Cell	hypoTH	ENSDARG00000074526	zbtb16b	zinc finger and BTB domain containing 16b	5.89e-308	1.08838	TF	ZBTB
Basal Cell	hypoTH	ENSDARG00000069946	itga6b	integrin, alpha 6b	1.49e-298	0.569542	Receptor
Basal Cell	hypoTH	ENSDARG00000008275	klhl24b	kelch-like family member 24b	2.61e-295	1.21031
Basal Cell	hypoTH	ENSDARG00000061796	rasgrp4	RAS guanyl releasing protein 4	1.81e-274	1.43058
Basal Cell	hypoTH	ENSDARG00000028943	mtss1la	MTSS I-BAR domain containing 2a	1.57e-273	1.99366
Basal Cell	hypoTH	ENSDARG00000099555	foxo1a	forkhead box O1 a	9.4e-271	1.54586	TF	Fork_head
Basal Cell	hypoTH	ENSDARG00000036848	slc43a2a	solute carrier family 43 member 2a	9.86e-248	1.69658
Basal Cell	hypoTH	ENSDARG00000028396	fkbp5	FKBP prolyl isomerase 5	1.73e-245	0.527674
Basal Cell	hypoTH	ENSDARG00000059950	plxdc2	plexin domain containing 2	3.23e-243	1.48031
Basal Cell	hypoTH	ENSDARG00000006031	abat	4-aminobutyrate aminotransferase	2.28e-236	1.19585
Basal Cell	hypoTH	ENSDARG00000020845	tns1b	tensin 1b	3.23e-226	0.766137
Basal Cell	hypoTH	ENSDARG00000037706	gss	glutathione synthetase	4.94e-226	2.04238
Basal Cell	hypoTH	ENSDARG00000074635	abca1a	ATP-binding cassette, sub-family A (ABC1), member 1A	1.94e-225	1.47687	Receptor
Basal Cell	hypoTH	ENSDARG00000078026	zcchc24	zinc finger, CCHC domain containing 24	1.06e-224	1.33244
Basal Cell	hypoTH	ENSDARG00000011407	col2a1b	collagen, type II, alpha 1b	6.54e-224	1.24998	Ligand
Basal Cell	hypoTH	ENSDARG00000012833	foxn3	forkhead box N3	2.38e-222	1.00002	TF	Fork_head
Basal Cell	hypoTH	ENSDARG00000007184	zbtb16a	zinc finger and BTB domain containing 16a	4.66e-222	0.647082	TF	ZBTB
Basal Cell	hypoTH	ENSDARG00000078322	col12a1a	collagen, type XII, alpha 1a	2.32e-205	1.31528
Basal Cell	hypoTH	ENSDARG00000042548	tpd52l1	tpd52 like 1	1.6e-203	1.30772
Basal Cell	hypoTH	ENSDARG00000101135	si:dkey-85k7.7	si:dkey-85k7.7	4.11e-203	2.1907
Basal Cell	hypoTH	ENSDARG00000104314	nrg1	neuregulin 1	4.07e-199	1.11682	Ligand
Basal Cell	hypoTH	ENSDARG00000105059	zgc:172282	zgc:172282	2.79e-193	3.61976
Basal Cell	hypoTH	ENSDARG00000017780	rorcb	RAR-related orphan receptor C b	8.47e-192	2.21313	TF	THR-like
Basal Cell	hypoTH	ENSDARG00000043587	srd5a2a	steroid-5-alpha-reductase, alpha polypeptide 2a	2.11e-190	0.923707
Basal Cell	hypoTH	ENSDARG00000062590	pleca	plectin a	1.01e-187	0.510154
Basal Cell	hypoTH	ENSDARG00000037012	slc3a2b	solute carrier family 3 member 2b	2.64e-187	1.86767
Basal Cell	hypoTH	ENSDARG00000098024	si:dkey-262k9.2	si:dkey-262k9.2	6.82e-185	1.03126
Basal Cell	hypoTH	ENSDARG00000029075	pfkfb4b	6-phosphofructo-2-kinase/fructose-2,6-biphosphatase 4b	1.17e-183	1.36586
Basal Cell	hypoTH	ENSDARG00000043182	hhla2a.1	HERV-H LTR-associating 2a, tandem duplicate 1	1.17e-182	1.85148
Basal Cell	hypoTH	ENSDARG00000052063	col4a5	collagen, type IV, alpha 5 (Alport syndrome)	1.04e-180	0.994294	Ligand
Basal Cell	hypoTH	ENSDARG00000036107	txnipa	thioredoxin interacting protein a	1.64e-178	1.43753	TF-cofactor	Others
Basal Cell	hypoTH	ENSDARG00000009031	tnikb	TRAF2 and NCK interacting kinase b	5.94e-175	0.546506
Basal Cell	hypoTH	ENSDARG00000000966	ncor2	nuclear receptor corepressor 2	1.55e-174	0.563796	TF	MYB
Basal Cell	hypoTH	ENSDARG00000020645	slc7a3a	solute carrier family 7 member 3a	7.08e-174	1.3582
Basal Cell	hypoTH	ENSDARG00000011879	foxn1	forkhead box N1	4.52e-172	1.40162	TF	Fork_head
Basal Cell	hypoTH	ENSDARG00000101816	col5a3b	collagen, type V, alpha 3b	1.16e-170	1.91163	Ligand
Basal Cell	hypoTH	ENSDARG00000104022	gcgra	glucagon receptor a	1.4e-170	1.27657	Receptor
Basal Cell	hypoTH	ENSDARG00000016011	gpcpd1	glycerophosphocholine phosphodiesterase 1	6.58e-166	0.884383
Basal Cell	hypoTH	ENSDARG00000036028	arrdc3b	arrestin domain containing 3b	3.26e-163	2.03039
Basal Cell	hypoTH	ENSDARG00000004074	bach2b	BTB and CNC homology 1, basic leucine zipper transcription factor 2b	1.79e-161	0.853189	TF	TF_bZIP
Basal Cell	hypoTH	ENSDARG00000014577	rhpn2	rhophilin, Rho GTPase binding protein 2	2.69e-161	1.15514
Basal Cell	hypoTH	ENSDARG00000058115	fgfr2	fibroblast growth factor receptor 2	1.32e-160	0.41051	Receptor
Basal Cell	hypoTH	ENSDARG00000054771	ghra	growth hormone receptor a	2.6e-160	1.37283	Receptor
Basal Cell	hypoTH	ENSDARG00000039133	lamb4	laminin, beta 4	1.53e-156	1.00081
Basal Cell	hypoTH	ENSDARG00000020761	arrdc2	arrestin domain containing 2	1.47e-155	1.56652
Basal Cell	hypoTH	ENSDARG00000103720	zgc:162730	zgc:162730	3.15e-155	1.17704	TF	zf-CCCH
Basal Cell	hypoTH	ENSDARG00000062008	hs2st1b	heparan sulfate 2-O-sulfotransferase 1b	6.99e-152	0.777268
Basal Cell	hypoTH	ENSDARG00000075930	adamts2	ADAM metallopeptidase with thrombospondin type 1 motif, 2	2.08e-151	0.929353
Basal Cell	hypoTH	ENSDARG00000018787	efna1b	ephrin-A1b	4.49e-150	1.68836	Ligand
Basal Cell	hypoTH	ENSDARG00000086856	stk35	serine/threonine kinase 35	2.63e-149	0.64942
Basal Cell	hypoTH	ENSDARG00000099719	cdkn1d	cyclin-dependent kinase inhibitor 1D	7.63e-147	1.62372
Basal Cell	hypoTH	ENSDARG00000087303	cebpd	CCAAT enhancer binding protein delta	7.84e-145	1.4126	TF	TF_bZIP
Basal Cell	hypoTH	ENSDARG00000014907	htra1b	HtrA serine peptidase 1b	2.71e-143	1.17608
Basal Cell	hypoTH	ENSDARG00000003449	pde10a	phosphodiesterase 10A	8.93e-143	1.42918
Basal Cell	hypoTH	ENSDARG00000018898	zfand5a	zinc finger, AN1-type domain 5a	2.78e-141	1.35468
Basal Cell	hypoTH	ENSDARG00000040534	epcam	epithelial cell adhesion molecule	5.36e-141	1.08297
Basal Cell	hypoTH	ENSDARG00000013847	egfra	epidermal growth factor receptor a (erythroblastic leukemia viral (v-erb-b) oncogene homolog, avian)	7.15e-140	0.651396	Receptor
Basal Cell	hypoTH	ENSDARG00000018814	esrp2	epithelial splicing regulatory protein 2	5.47e-138	0.862135
Basal Cell	hypoTH	ENSDARG00000028517	hbp1	HMG-box transcription factor 1	2.29e-136	1.09554	TF	HMG
Basal Cell	hypoTH	ENSDARG00000015164	mknk2b	MAPK interacting serine/threonine kinase 2b	5.54e-135	1.02903
Basal Cell	hypoTH	ENSDARG00000099749	ube2d2l	ubiquitin-conjugating enzyme E2D 2 (UBC4/5 homolog, yeast), like	4.16e-132	1.55122
Basal Cell	hypoTH	ENSDARG00000079323	rgmb	repulsive guidance molecule BMP co-receptor b	1.03e-128	1.81328	Ligand
Basal Cell	hypoTH	ENSDARG00000010785	thbs1b	thrombospondin 1b	9.87e-127	2.16768	Ligand
Basal Cell	hypoTH	ENSDARG00000111945	CABZ01069040.1		6.79e-126	1.20996
Basal Cell	hypoTH	ENSDARG00000098368	aplp1	amyloid beta (A4) precursor-like protein 1	1.33e-125	1.23743
Basal Cell	hypoTH	ENSDARG00000104279	appa	amyloid beta (A4) precursor protein a	4.48e-125	0.635946	Ligand
Basal Cell	hypoTH	ENSDARG00000051896	fbn2a	fibrillin 2a	2.82e-124	0.737766	Ligand
Basal Cell	hypoTH	ENSDARG00000062562	egln2	egl-9 family hypoxia-inducible factor 2	8.33e-124	2.3033	TF-cofactor	Others
Basal Cell	hypoTH	ENSDARG00000062519	abcc13	ATP-binding cassette, sub-family C (CFTR/MRP), member 13	1.11e-123	1.88643
Basal Cell	hypoTH	ENSDARG00000074752	hlfa	HLF transcription factor, PAR bZIP family member a	2.85e-123	1.39703	TF	TF_bZIP
Basal Cell	hypoTH	ENSDARG00000062054	cpt1ab	carnitine palmitoyltransferase 1Ab (liver)	1.63e-121	1.17011
Basal Cell	hypoTH	ENSDARG00000020693	sesn1	sestrin 1	1.75e-121	1.33742
Basal Cell	hypoTH	ENSDARG00000029766	nr1i2	nuclear receptor subfamily 1, group I, member 2	7.1e-121	0.960095	TF	THR-like
Basal Cell	hypoTH	ENSDARG00000030687	phka2	phosphorylase kinase, alpha 2 (liver)	1.07e-119	1.30465
Basal Cell	hypoTH	ENSDARG00000101752	plekhg5b	pleckstrin homology domain containing, family G (with RhoGef domain) member 5b	1.34e-119	0.493926
Basal Cell	hypoTH	ENSDARG00000100529	sh3bp5a	SH3-domain binding protein 5a (BTK-associated)	1.91e-119	1.15098
Basal Cell	hypoTH	ENSDARG00000035519	histh1l	histone H1 like	4.97e-118	1.44441
Basal Cell	hypoTH	ENSDARG00000043154	ucp2	uncoupling protein 2	1e-117	0.680099
Basal Cell	hypoTH	ENSDARG00000077901	herc1	HECT and RLD domain containing E3 ubiquitin protein ligase family member 1	4.57e-114	1.16871
Basal Cell	hypoTH	ENSDARG00000043667	zgc:100997	zgc:100997	6.47e-113	0.801581
Basal Cell	hypoTH	ENSDARG00000052061	col4a6	collagen, type IV, alpha 6	2.21e-112	0.6446	Ligand
Basal Cell	hypoTH	ENSDARG00000042824	nfe2l2a	nuclear factor, erythroid 2-like 2a	7.62e-112	0.768806	TF	TF_bZIP
Basal Cell	hypoTH	ENSDARG00000060246	slc16a6b	solute carrier family 16 member 6b	1.25e-111	2.07188
Basal Cell	hypoTH	ENSDARG00000098239	zgc:85932	zgc:85932	1.38e-110	1.21814
Basal Cell	hypoTH	ENSDARG00000100518	CR387919.1		1.08e-105	0.456096
Basal Cell	hypoTH	ENSDARG00000011122	pptc7a	PTC7 protein phosphatase homolog a	4.28e-105	1.19792
Basal Cell	hypoTH	ENSDARG00000010641	slc20a1b	solute carrier family 20 member 1b	4.62e-104	0.920385
Basal Cell	hypoTH	ENSDARG00000042807	slc16a4	solute carrier family 16 member 4	1.06e-103	1.89715
Basal Cell	hypoTH	ENSDARG00000018524	midn	midnolin	6.66e-103	0.647307
Basal Cell	hypoTH	ENSDARG00000045842	zgc:113263	zgc:113263	1.27e-96	1.27381
Basal Cell	hypoTH	ENSDARG00000017602	ccng2	cyclin G2	5.18e-96	1.22757
Basal Cell	hypoTH	ENSDARG00000076623	col14a1b	collagen, type XIV, alpha 1b	5.43e-96	1.39398	Ligand
Basal Cell	hypoTH	ENSDARG00000059604	mtss1	MTSS I-BAR domain containing 1	4.28e-94	0.720644
Basal Cell	hypoTH	ENSDARG00000003216	anxa2a	annexin A2a	4.43e-94	0.635096
Basal Cell	hypoTH	ENSDARG00000061515	tmtops2a	teleost multiple tissue opsin 2a	5.59e-94	2.3978
Basal Cell	hypoTH	ENSDARG00000045887	mmp30	matrix metallopeptidase 30	1.19e-93	1.79168
Basal Cell	hypoTH	ENSDARG00000020850	eef1a1l1	eukaryotic translation elongation factor 1 alpha 1, like 1	4.59e-92	0.602662
Basal Cell	hypoTH	ENSDARG00000025522	sgk1	serum/glucocorticoid regulated kinase 1	2.18e-90	2.31698
Basal Cell	hypoTH	ENSDARG00000010752	acsl4b	acyl-CoA synthetase long chain family member 4b	4.12e-90	1.12292
Basal Cell	hypoTH	ENSDARG00000094965	nfil3-5	nuclear factor, interleukin 3 regulated, member 5	1.98e-89	2.3534	TF	TF_bZIP
Basal Cell	hypoTH	ENSDARG00000002271	zfand5b	zinc finger, AN1-type domain 5b	4.57e-89	1.20934
Basal Cell	hypoTH	ENSDARG00000036135	bbox1	butyrobetaine (gamma), 2-oxoglutarate dioxygenase (gamma-butyrobetaine hydroxylase) 1	8.17e-89	1.07938
Basal Cell	hypoTH	ENSDARG00000008697	epas1a	endothelial PAS domain protein 1a	2.6e-88	1.53391
Basal Cell	hypoTH	ENSDARG00000040452	fam214a	family with sequence similarity 214 member A	2.77e-88	0.542256
Basal Cell	hypoTH	ENSDARG00000011672	sema3b	sema domain, immunoglobulin domain (Ig), short basic domain, secreted, (semaphorin) 3B	1.25e-87	2.24907	Ligand
Basal Cell	hypoTH	ENSDARG00000091209	ucp3	uncoupling protein 3	2.35e-85	3.49675
Basal Cell	hypoTH	ENSDARG00000004763	hhla2a.2	HERV-H LTR-associating 2a, tandem duplicate 2	3.76e-85	3.24052
Basal Cell	hypoTH	ENSDARG00000055349	pknox2	pbx/knotted 1 homeobox 2	4.23e-85	1.9669	TF	Homeobox
Basal Cell	hypoTH	ENSDARG00000059646	nt5dc2	5'-nucleotidase domain containing 2	1.17e-84	1.18769
Basal Cell	hypoTH	ENSDARG00000038964	traf4b	tnf receptor-associated factor 4b	4.68e-84	1.48499
Basal Cell	hypoTH	ENSDARG00000038559	h1f0	H1 histone family, member 0	1.97e-83	1.13457
Basal Cell	hypoTH	ENSDARG00000054058	h1fx	H1 histone family, member X	1.2e-82	1.98092
Basal Cell	hypoTH	ENSDARG00000100371	eef2b	eukaryotic translation elongation factor 2b	1.9e-82	0.48383
Basal Cell	hypoTH	ENSDARG00000077677	pdgfd	platelet derived growth factor d	4.06e-82	1.07304	Ligand
Basal Cell	hypoTH	ENSDARG00000076496	frmd4bb	FERM domain containing 4Bb	4.96e-82	1.23039
Basal Cell	hypoTH	ENSDARG00000103057	zfhx3	zinc finger homeobox 3	9.09e-80	0.736546	TF	Homeobox
Basal Cell	hypoTH	ENSDARG00000004843	foxp1a	forkhead box P1a	9.92e-80	0.787786	TF	Fork_head
Basal Cell	hypoTH	ENSDARG00000093313	ubb	ubiquitin B	2.29e-79	1.33892
Basal Cell	hypoTH	ENSDARG00000063050	rc3h2	ring finger and CCCH-type domains 2	3.38e-79	0.988784
Basal Cell	hypoTH	ENSDARG00000063539	slc25a15a	solute carrier family 25 member 15a	1.12e-78	0.90397	TF-cofactor	SLC
Basal Cell	hypoTH	ENSDARG00000088595	crispld2	cysteine-rich secretory protein LCCL domain containing 2	5.82e-77	1.64276
Basal Cell	hypoTH	ENSDARG00000089564	MDFI		6.66e-77	0.548477	TF-cofactor	Others
Basal Cell	hypoTH	ENSDARG00000102406	si:ch211-165e15.1	si:ch211-165e15.1	1.11e-76	1.04306
Basal Cell	hypoTH	ENSDARG00000041839	tsc22d2	TSC22 domain family 2	2.7e-76	0.70486	TF	TSC22
Basal Cell	hypoTH	ENSDARG00000105424	si:rp71-46j2.7	si:rp71-46j2.7	2.93e-74	1.82065
Basal Cell	hypoTH	ENSDARG00000063031	rad54l2	RAD54 like 2	3.43e-74	1.0665
Basal Cell	hypoTH	ENSDARG00000040255	ephx2	epoxide hydrolase 2, cytoplasmic	1.3e-72	0.793126
Basal Cell	hypoTH	ENSDARG00000006526	fn1b	fibronectin 1b	3.6e-72	1.93085	Ligand
Basal Cell	hypoTH	ENSDARG00000090160	zgc:173709	zgc:173709	1.2e-71	2.51522	TF	zf-C2H2
Basal Cell	hypoTH	ENSDARG00000055350	sun1	Sad1 and UNC84 domain containing 1	9.86e-71	0.454216
Basal Cell	hypoTH	ENSDARG00000007737	zyg11	zyg-11 homolog (C. elegans)	1.05e-70	0.856388
Basal Cell	hypoTH	ENSDARG00000035308	grb10b	growth factor receptor-bound protein 10b	1.1e-70	0.399718
Basal Cell	hypoTH	ENSDARG00000091131	cry3b	cryptochrome circadian regulator 3b	2.1e-70	2.39599
Basal Cell	hypoTH	ENSDARG00000029671	xpr1b	xenotropic and polytropic retrovirus receptor 1b	3.94e-70	0.836049
Basal Cell	hypoTH	ENSDARG00000056856	tax1bp1b	Tax1 (human T-cell leukemia virus type I) binding protein 1b	5.23e-69	0.660705	TF	Others
Basal Cell	hypoTH	ENSDARG00000005453	foxp2	forkhead box P2	1.08e-68	1.53945	TF	Fork_head
Basal Cell	hypoTH	ENSDARG00000018716	dgkh	diacylglycerol kinase, eta	2.72e-68	0.864847
Basal Cell	hypoTH	ENSDARG00000035859	angptl4	angiopoietin-like 4	3.63e-68	1.06449	Ligand
Basal Cell	hypoTH	ENSDARG00000075121	hbegfa	heparin-binding EGF-like growth factor a	4.74e-68	1.06365	Ligand
Basal Cell	hypoTH	ENSDARG00000032458	mark2b	MAP/microtubule affinity-regulating kinase 2b	7.92e-68	0.391072
Basal Cell	hypoTH	ENSDARG00000055093	cdh27	cadherin 27	1.08e-67	0.659754
Basal Cell	hypoTH	ENSDARG00000068194	klf9	Kruppel-like factor 9	1.28e-67	1.2454	TF	zf-C2H2
Basal Cell	hypoTH	ENSDARG00000095908	sat1a.2	spermidine/spermine N1-acetyltransferase 1a, duplicate 2	2.92e-67	0.911906
Basal Cell	hypoTH	ENSDARG00000030326	efna1a	ephrin-A1a	3.59e-67	0.862043	Ligand
Basal Cell	hypoTH	ENSDARG00000041117	wnt2	wingless-type MMTV integration site family member 2	3.31e-66	1.56771	Ligand
Basal Cell	hypoTH	ENSDARG00000100003	glulb	glutamate-ammonia ligase (glutamine synthase) b	2.49e-65	1.66635
Basal Cell	hypoTH	ENSDARG00000111269	CABZ01087224.1		8.57e-65	1.42615	TF	TF_bZIP
Basal Cell	hypoTH	ENSDARG00000038731	slc25a36a	solute carrier family 25 member 36a	1.93e-64	0.993014
Basal Cell	hypoTH	ENSDARG00000089418	si:dkey-164f24.2	si:dkey-164f24.2	2.13e-64	1.44898
Basal Cell	hypoTH	ENSDARG00000099148	bzw1b	basic leucine zipper and W2 domains 1b	7.95e-64	1.56738
Basal Cell	hypoTH	ENSDARG00000029150	hsp90ab1	heat shock protein 90, alpha (cytosolic), class B member 1	1.85e-63	0.529122
Basal Cell	hypoTH	ENSDARG00000105040	dipk1c	divergent protein kinase domain 1C	2.52e-62	0.58398
Basal Cell	hypoTH	ENSDARG00000079967	prkd3	protein kinase D3	1.58e-61	0.379179
Basal Cell	hypoTH	ENSDARG00000073872	tpst1	tyrosylprotein sulfotransferase 1	2.86e-61	1.00859
Basal Cell	hypoTH	ENSDARG00000105088	tenm4	teneurin transmembrane protein 4	5.81e-61	1.16411
Basal Cell	hypoTH	ENSDARG00000105287	mpp1	membrane protein, palmitoylated 1	7.17e-61	1.4998
Basal Cell	hypoTH	ENSDARG00000059672	arhgap36	Rho GTPase activating protein 36	8.8e-61	0.801199
Basal Cell	hypoTH	ENSDARG00000076292	tns2a	tensin 2a	1.09e-60	1.08502
Basal Cell	hypoTH	ENSDARG00000009830	hdlbpa	high density lipoprotein binding protein a	5.47e-60	0.472796
Basal Cell	hypoTH	ENSDARG00000018399	rps6kb1a	ribosomal protein S6 kinase b, polypeptide 1a	5.84e-60	1.10585
Basal Cell	hypoTH	ENSDARG00000027249	btg1	B-cell translocation gene 1, anti-proliferative	1.07e-59	0.564545	TF-cofactor	Others
Basal Cell	hypoTH	ENSDARG00000062974	itga2.2	integrin, alpha 2 (CD49B, alpha 2 subunit of VLA-2 receptor), tandem duplicate 2	1.94e-57	0.487068	Receptor
Basal Cell	hypoTH	ENSDARG00000009544	cldnb	claudin b	7.85e-57	1.53396
Basal Cell	hypoTH	ENSDARG00000019328	plxna4	plexin A4	9.57e-57	0.696177	Receptor
Basal Cell	hypoTH	ENSDARG00000091042	sacs	sacsin molecular chaperone	1.26e-56	1.29245
Basal Cell	hypoTH	ENSDARG00000035120	gldc	glycine dehydrogenase (decarboxylating)	1.58e-56	2.7268
Basal Cell	hypoTH	ENSDARG00000098631	CABZ01044277.1		2.48e-56	1.57899
Basal Cell	hypoTH	ENSDARG00000018923	fat2	FAT atypical cadherin 2	3.19e-56	0.378719
Basal Cell	hypoTH	ENSDARG00000069074	cry3a	cryptochrome circadian regulator 3a	1.29e-55	0.642412
Basal Cell	hypoTH	ENSDARG00000077396	tlcd2	TLC domain containing 2	1.86e-55	0.491278
Basal Cell	hypoTH	ENSDARG00000017624	krt4	keratin 4	3.19e-55	0.7971
Basal Cell	hypoTH	ENSDARG00000074955	nup98	nucleoporin 98	7.77e-55	0.986311	TF-cofactor	Others
Basal Cell	hypoTH	ENSDARG00000019181	rpsa	ribosomal protein SA	1.47e-54	0.62081
Basal Cell	hypoTH	ENSDARG00000045070	itgb3b	integrin beta 3b	2.29e-54	1.35745
Basal Cell	hypoTH	ENSDARG00000036985	plxnb2b	plexin b2b	2.98e-54	0.544744	Receptor
Basal Cell	hypoTH	ENSDARG00000034293	hif1ab	hypoxia inducible factor 1 subunit alpha b	1.78e-53	0.667783	TF	Others
Basal Cell	hypoTH	ENSDARG00000015790	atp1b3a	ATPase Na+/K+ transporting subunit beta 3a	4.45e-53	1.53419
Basal Cell	hypoTH	ENSDARG00000086746	prodha	proline dehydrogenase (oxidase) 1a	2.55e-52	0.75272
Basal Cell	hypoTH	ENSDARG00000035732	arntl1b	aryl hydrocarbon receptor nuclear translocator-like 1b	2.79e-52	1.09893	TF	bHLH
Basal Cell	hypoTH	ENSDARG00000051861	pkp3a	plakophilin 3a	3.29e-52	0.259583
Basal Cell	hypoTH	ENSDARG00000102777	thbs4a	thrombospondin 4a	3.61e-52	1.6463
Basal Cell	hypoTH	ENSDARG00000042021	mapk12a	mitogen-activated protein kinase 12a	1.61e-51	0.641516
Basal Cell	hypoTH	ENSDARG00000101043	ppl	periplakin	2.36e-51	0.542603
Basal Cell	hypoTH	ENSDARG00000067676	plcl1	phospholipase C like 1	2.4e-51	0.520905
Basal Cell	hypoTH	ENSDARG00000099371	cygb1	cytoglobin 1	2.4e-51	1.09185
Basal Cell	hypoTH	ENSDARG00000023185	si:rp71-1g18.13	si:rp71-1g18.13	3.85e-51	0.740764
Basal Cell	hypoTH	ENSDARG00000060796	slc20a2	solute carrier family 20 member 2	5.67e-51	0.521081
Basal Cell	hypoTH	ENSDARG00000075542	zfhx4	zinc finger homeobox 4	8.76e-51	0.910472	TF	Homeobox
Basal Cell	hypoTH	ENSDARG00000008363	mcl1b	MCL1 apoptosis regulator, BCL2 family member b	1.64e-50	1.20236
Basal Cell	hypoTH	ENSDARG00000031647	stat2	signal transducer and activator of transcription 2	2.79e-50	0.926859	TF	STAT
Basal Cell	hypoTH	ENSDARG00000079665	gpr158b	G protein-coupled receptor 158b	4.52e-50	2.29257
Basal Cell	hypoTH	ENSDARG00000012866	picalma	phosphatidylinositol binding clathrin assembly protein a	5.06e-50	0.621557
Basal Cell	hypoTH	ENSDARG00000071524	insrb	insulin receptor b	9.07e-50	0.349407	Receptor
Basal Cell	hypoTH	ENSDARG00000030104	sh3bp4	SH3-domain binding protein 4	1e-49	0.58684
Basal Cell	hypoTH	ENSDARG00000099533	zgc:113279	zgc:113279	1.42e-49	0.704648
Basal Cell	hypoTH	ENSDARG00000075034	raver2	ribonucleoprotein, PTB-binding 2	3.57e-49	0.99197
Basal Cell	hypoTH	ENSDARG00000098874	exoc6b	exocyst complex component 6B	5.37e-49	0.398728
Basal Cell	hypoTH	ENSDARG00000061994	acacb	acetyl-CoA carboxylase beta	8.1e-49	0.651037
Basal Cell	hypoTH	ENSDARG00000028071	bmp1a	bone morphogenetic protein 1a	8.34e-49	0.46975
Basal Cell	hypoTH	ENSDARG00000070787	jupa	junction plakoglobin a	9.96e-49	0.302951	TF-cofactor	Others
Basal Cell	hypoTH	ENSDARG00000010758	capn12	calpain 12	1.97e-48	0.536231
Basal Cell	hypoTH	ENSDARG00000075110	dab2ipb	DAB2 interacting protein b	2.53e-48	0.410088
Basal Cell	hypoTH	ENSDARG00000099791	pdk3b	pyruvate dehydrogenase kinase, isozyme 3b	4.75e-48	1.32598
Basal Cell	hypoTH	ENSDARG00000014047	cldn7b	claudin 7b	6.09e-48	1.65173
Basal Cell	hypoTH	ENSDARG00000017665	snrkb	SNF related kinase b	6.65e-48	0.658247
Basal Cell	hypoTH	ENSDARG00000077588	pdgfc	platelet derived growth factor c	8.36e-48	0.529568	Ligand
Basal Cell	hypoTH	ENSDARG00000039211	zgc:77439	zgc:77439	9.88e-48	1.62878
Basal Cell	hypoTH	ENSDARG00000079745	si:ch211-166a6.5	si:ch211-166a6.5	1.26e-47	0.353835
Basal Cell	hypoTH	ENSDARG00000078882	slc22a31	solute carrier family 22 member 31	2.26e-47	1.32511
Basal Cell	hypoTH	ENSDARG00000075831	slc7a8a	solute carrier family 7 member 8a	3.06e-47	2.45705
Basal Cell	hypoTH	ENSDARG00000054616	cldni	claudin i	3.17e-47	0.301369
Basal Cell	hypoTH	ENSDARG00000093549	selenop	selenoprotein P	3.66e-47	1.25538
Basal Cell	hypoTH	ENSDARG00000052468	gsk3bb	glycogen synthase kinase 3 beta, genome duplicate b	2.04e-46	1.74443
Basal Cell	hypoTH	ENSDARG00000011171	si:ch211-12m10.1	si:ch211-12m10.1	2.49e-46	1.4369
Basal Cell	hypoTH	ENSDARG00000100815	srsf3a	serine and arginine rich splicing factor 3a	4.01e-46	0.849761
Basal Cell	hypoTH	ENSDARG00000005943	htra4	HtrA serine peptidase 4	5.36e-46	0.918844
Basal Cell	hypoTH	ENSDARG00000015374	st3gal3a	ST3 beta-galactoside alpha-2,3-sialyltransferase 3a	5.68e-46	0.67678
Basal Cell	hypoTH	ENSDARG00000031302	smap1	small ArfGAP 1	1.16e-45	0.390911
Basal Cell	hypoTH	ENSDARG00000099092	RASGRP2		1.33e-45	0.811998
Basal Cell	hypoTH	ENSDARG00000070426	chac1	ChaC, cation transport regulator homolog 1 (E. coli)	2.02e-45	0.735289
Basal Cell	hypoTH	ENSDARG00000011703	clocka	clock circadian regulator a	2.21e-45	0.802698	TF	bHLH
Basal Cell	hypoTH	ENSDARG00000070162	stox2a	storkhead box 2a	3.5e-45	1.39523
Basal Cell	hypoTH	ENSDARG00000016830	rimkla	ribosomal modification protein rimK-like family member A	3.74e-45	1.30924
Basal Cell	hypoTH	ENSDARG00000002344	tubb4b	tubulin, beta 4B class IVb	3.84e-45	0.768275
Basal Cell	hypoTH	ENSDARG00000002369	UBB		5.45e-45	1.22195
Basal Cell	hypoTH	ENSDARG00000079585	pkn3	protein kinase N3	6.49e-45	1.46973
Basal Cell	hypoTH	ENSDARG00000098667	grin3bb	glutamate receptor, ionotropic, N-methyl-D-aspartate 3Bb	6.64e-45	2.06816
Basal Cell	hypoTH	ENSDARG00000116617	spaca4l	sperm acrosome associated 4 like	7.95e-45	0.357501
Basal Cell	hypoTH	ENSDARG00000041182	rpl4	ribosomal protein L4	9.67e-45	0.527882
Basal Cell	hypoTH	ENSDARG00000010789	homer3b	homer scaffold protein 3b	5.09e-44	0.803811
Basal Cell	hypoTH	ENSDARG00000042725	cebpb	CCAAT enhancer binding protein beta	5.84e-44	2.84727	TF	TF_bZIP
Basal Cell	hypoTH	ENSDARG00000074242	serbp1a	SERPINE1 mRNA binding protein 1a	1.53e-43	0.499293
Basal Cell	hypoTH	ENSDARG00000054609	slco2b1	solute carrier organic anion transporter family, member 2B1	3.46e-43	0.420365
Basal Cell	hypoTH	ENSDARG00000094696	si:dkey-201c13.2	si:dkey-201c13.2	6.18e-43	1.51944
Basal Cell	hypoTH	ENSDARG00000056892	mpp6a	membrane protein, palmitoylated 6a (MAGUK p55 subfamily member 6)	1.75e-42	0.692717
Basal Cell	hypoTH	ENSDARG00000023323	ywhaqb	tyrosine 3-monooxygenase/tryptophan 5-monooxygenase activation protein, theta polypeptide b	2.52e-42	0.485142
Basal Cell	hypoTH	ENSDARG00000037196	arid5b	AT-rich interaction domain 5B	2.68e-42	0.301329	TF	ARID
Basal Cell	hypoTH	ENSDARG00000101074	glud1b	glutamate dehydrogenase 1b	6.39e-42	0.879766
Basal Cell	hypoTH	ENSDARG00000100981	CCDC39		7.03e-42	2.36205
Basal Cell	hypoTH	ENSDARG00000063229	xpo1b	exportin 1 (CRM1 homolog, yeast) b	8.25e-42	1.26074
Basal Cell	hypoTH	ENSDARG00000013351	cirbpb	cold inducible RNA binding protein b	1.8e-41	0.516136
Basal Cell	hypoTH	ENSDARG00000098304	taok1b	TAO kinase 1b	3.31e-41	0.605417
Basal Cell	hypoTH	ENSDARG00000077291	rps2	ribosomal protein S2	3.44e-41	0.427451
Basal Cell	hypoTH	ENSDARG00000089645	si:ch1073-406l10.2	si:ch1073-406l10.2	4.25e-41	0.654965
Basal Cell	hypoTH	ENSDARG00000102572	si:ch211-260e23.9	si:ch211-260e23.9	6.1e-41	1.11272
Basal Cell	hypoTH	ENSDARG00000068461	aopep	aminopeptidase O (putative)	1.2e-40	0.46698
Basal Cell	hypoTH	ENSDARG00000102632	ubc	ubiquitin C	2.2e-40	0.847568
Basal Cell	hypoTH	ENSDARG00000107408	TCF4		2.39e-40	0.456397	TF	bHLH
Basal Cell	hypoTH	ENSDARG00000104210	si:ch73-173h19.3	si:ch73-173h19.3	5.03e-40	0.744217	Ligand
Basal Cell	hypoTH	ENSDARG00000074143	myo10l3	myosin X, like 3	1.58e-39	0.614065
Basal Cell	hypoTH	ENSDARG00000041502	tgfb1a	transforming growth factor, beta 1a	5.25e-39	0.802077	Ligand
Basal Cell	hypoTH	ENSDARG00000057353	ehbp1l1a	EH domain binding protein 1-like 1a	1.05e-38	0.63592
Basal Cell	hypoTH	ENSDARG00000103775	thbs1a	thrombospondin 1a	1.46e-38	2.03938	Ligand
Basal Cell	hypoTH	ENSDARG00000027017	ppp2r5a	protein phosphatase 2, regulatory subunit B', alpha isoform	1.47e-38	0.459856
Basal Cell	hypoTH	ENSDARG00000088157	smoc2	SPARC related modular calcium binding 2	1.65e-38	0.531701
Basal Cell	hypoTH	ENSDARG00000006266	stat1a	signal transducer and activator of transcription 1a	2.18e-38	0.732724	TF	STAT
Basal Cell	hypoTH	ENSDARG00000010794	tfeb	transcription factor EB	3.64e-38	1.66264	TF	bHLH
Basal Cell	hypoTH	ENSDARG00000045199	zgc:55262	zgc:55262	3.88e-38	0.605866
Basal Cell	hypoTH	ENSDARG00000062750	si:ch73-74h11.1	si:ch73-74h11.1	6.28e-38	0.379344
Basal Cell	hypoTH	ENSDARG00000011222	ccdc28b	coiled-coil domain containing 28B	6.33e-38	1.38041
Basal Cell	hypoTH	ENSDARG00000078567	lonrf1l	LON peptidase N-terminal domain and ring finger 1, like	1.36e-37	0.698629
Basal Cell	hypoTH	ENSDARG00000003599	rpl3	ribosomal protein L3	1.54e-37	0.433174
Basal Cell	hypoTH	ENSDARG00000017219	pabpc1a	poly(A) binding protein, cytoplasmic 1a	1.56e-37	0.417761
Basal Cell	hypoTH	ENSDARG00000062855	plekhg7	pleckstrin homology domain containing, family G (with RhoGef domain) member 7	1.58e-37	1.23706
Basal Cell	hypoTH	ENSDARG00000059054	pdk2b	pyruvate dehydrogenase kinase, isozyme 2b	2.01e-37	1.19427
Basal Cell	hypoTH	ENSDARG00000044034	tmem86a	transmembrane protein 86A	2.12e-37	1.32691
Basal Cell	hypoTH	ENSDARG00000076128	prkar1aa	protein kinase, cAMP-dependent, regulatory, type I, alpha (tissue specific extinguisher 1) a	2.38e-37	1.04668
Basal Cell	hypoTH	ENSDARG00000090585	gpc1b	glypican 1b	2.56e-37	0.512299	Receptor
Basal Cell	hypoTH	ENSDARG00000098826	plcl2	phospholipase C like 2	7.78e-37	0.639038
Basal Cell	hypoTH	ENSDARG00000061011	hlfb	HLF transcription factor, PAR bZIP family member b	9.9e-37	1.60347	TF	TF_bZIP
Basal Cell	hypoTH	ENSDARG00000020298	btg2	B-cell translocation gene 2	1.54e-36	1.17114
Basal Cell	hypoTH	ENSDARG00000015355	fosl1a	FOS-like antigen 1a	1.57e-36	2.83941	TF	TF_bZIP
Basal Cell	hypoTH	ENSDARG00000054723	si:ch211-242b18.1	si:ch211-242b18.1	3.76e-36	0.291836
Basal Cell	hypoTH	ENSDARG00000039406	prom2	prominin 2	3.89e-36	0.611342
Basal Cell	hypoTH	ENSDARG00000056119	eef1g	eukaryotic translation elongation factor 1 gamma	4.48e-36	0.465058
Basal Cell	hypoTH	ENSDARG00000042904	foxo3b	forkhead box O3b	5.95e-36	0.62758	TF	Fork_head
Basal Cell	hypoTH	ENSDARG00000074120	usp2b	ubiquitin specific peptidase 2b	1.2e-35	0.644649
Basal Cell	hypoTH	ENSDARG00000062430	gpd2	glycerol-3-phosphate dehydrogenase 2 (mitochondrial)	2.58e-35	0.460823
Basal Cell	hypoTH	ENSDARG00000029768	waplb	WAPL cohesin release factor b	2.62e-35	0.423282
Basal Cell	hypoTH	ENSDARG00000021372	tob1b	transducer of ERBB2, 1b	4.73e-35	1.06218
Basal Cell	hypoTH	ENSDARG00000020771	tnr	tenascin R (restrictin, janusin)	6.89e-35	1.12239
Basal Cell	hypoTH	ENSDARG00000020573	ddx3xa	DEAD-box helicase 3 X-linked a	7.77e-35	0.774466
Basal Cell	hypoTH	ENSDARG00000094377	samd10b	sterile alpha motif domain containing 10b	1.21e-34	1.1978
Basal Cell	hypoTH	ENSDARG00000017929	ncoa2	nuclear receptor coactivator 2	2.26e-34	0.368134	TF-cofactor	Nuclear receptor coactivator
Basal Cell	hypoTH	ENSDARG00000015902	stat6	signal transducer and activator of transcription 6, interleukin-4 induced	3.13e-34	0.422571	TF	STAT
Basal Cell	hypoTH	ENSDARG00000052470	igfbp2a	insulin-like growth factor binding protein 2a	3.72e-34	2.24184
Basal Cell	hypoTH	ENSDARG00000054848	pdk4	pyruvate dehydrogenase kinase, isozyme 4	6.13e-34	0.884971
Basal Cell	hypoTH	ENSDARG00000054864	aplp2	amyloid beta (A4) precursor-like protein 2	7.89e-34	0.343587
Basal Cell	hypoTH	ENSDARG00000035309	entpd3	ectonucleoside triphosphate diphosphohydrolase 3	9.25e-34	2.90352
Basal Cell	hypoTH	ENSDARG00000053291	pnrc2	proline-rich nuclear receptor coactivator 2	9.31e-34	0.589638
Basal Cell	hypoTH	ENSDARG00000070600	dyrk3	dual specificity tyrosine phosphorylation regulated kinase 3	9.75e-34	1.18213
Basal Cell	hypoTH	ENSDARG00000043643	ehbp1	EH domain binding protein 1	1.86e-33	0.447515
Basal Cell	hypoTH	ENSDARG00000090346	zmp:0000000991	zmp:0000000991	2.87e-33	0.687006
Basal Cell	hypoTH	ENSDARG00000016536	npas2	neuronal PAS domain protein 2	3.99e-33	1.2775	TF	bHLH
Basal Cell	hypoTH	ENSDARG00000063572	perp	p53 apoptosis effector related to pmp22	8.95e-33	0.229369
Basal Cell	hypoTH	ENSDARG00000058454	dynll1	dynein, light chain, LC8-type 1	8.99e-33	1.15101
Basal Cell	hypoTH	ENSDARG00000031426	csrnp1a	cysteine-serine-rich nuclear protein 1a	1.19e-32	1.5827	TF	CSRNP_N
Basal Cell	hypoTH	ENSDARG00000068711	crfb4	cytokine receptor family member b4	3.07e-32	0.406598	Receptor
Basal Cell	hypoTH	ENSDARG00000052674	csnk1a1	casein kinase 1, alpha 1	4.72e-32	0.393766
Basal Cell	hypoTH	ENSDARG00000067630	zgc:154075	zgc:154075	6.32e-32	1.05436
Basal Cell	hypoTH	ENSDARG00000058371	krt5	keratin 5	6.79e-32	0.283452
Basal Cell	hypoTH	ENSDARG00000013794	klf11b	Kruppel-like factor 11b	9.42e-32	0.977889	TF	zf-C2H2
Basal Cell	hypoTH	ENSDARG00000062831	si:ch73-22o12.1	si:ch73-22o12.1	1.16e-31	0.564679
Basal Cell	hypoTH	ENSDARG00000023578	lpp	LIM domain containing preferred translocation partner in lipoma	1.19e-31	0.219182
Basal Cell	hypoTH	ENSDARG00000102066	ntn4	netrin 4	1.2e-31	1.29561	Ligand
Basal Cell	hypoTH	ENSDARG00000054539	lrp10	low density lipoprotein receptor-related protein 10	1.33e-31	0.897417
Basal Cell	hypoTH	ENSDARG00000023394	slc37a2	solute carrier family 37 member 2	1.34e-31	0.587911
Basal Cell	hypoTH	ENSDARG00000074686	oga	O-GlcNAcase	1.48e-31	0.603369
Basal Cell	hypoTH	ENSDARG00000003854	acsl1b	acyl-CoA synthetase long chain family member 1b	2.13e-31	0.799906
Basal Cell	hypoTH	ENSDARG00000100826	hif1al	hypoxia inducible factor 1 subunit alpha, like	2.68e-31	0.352906
Basal Cell	hypoTH	ENSDARG00000098689	ptpn23b	protein tyrosine phosphatase, non-receptor type 23, b	3.28e-31	1.27728
Basal Cell	hypoTH	ENSDARG00000087452	peli3	pellino E3 ubiquitin protein ligase family member 3	4.38e-31	0.869779
Basal Cell	hypoTH	ENSDARG00000061242	tuft1a	tuftelin 1a	5.06e-31	0.534088
Basal Cell	hypoTH	ENSDARG00000094990	si:dkey-91f15.1	si:dkey-91f15.1	8.93e-31	0.90298
Basal Cell	hypoTH	ENSDARG00000043406	slc8a1b	solute carrier family 8 member 1b	1.26e-30	1.01751
Basal Cell	hypoTH	ENSDARG00000041607	eif4ebp3l	eukaryotic translation initiation factor 4E binding protein 3, like	1.4e-30	1.1498
Basal Cell	hypoTH	ENSDARG00000010773	pnpla6	patatin-like phospholipase domain containing 6	1.66e-30	0.535803
Basal Cell	hypoTH	ENSDARG00000055292	atg9b	autophagy related 9B	1.81e-30	0.727471
Basal Cell	hypoTH	ENSDARG00000086034	nectin1b	nectin cell adhesion molecule 1b	1.96e-30	0.290451	Receptor
Basal Cell	hypoTH	ENSDARG00000031049	igsf21a	immunoglobin superfamily, member 21a	2.02e-30	1.43334
Basal Cell	hypoTH	ENSDARG00000031240	kidins220a	kinase D-interacting substrate 220a	2.38e-30	0.478104	Receptor
Basal Cell	hypoTH	ENSDARG00000070543	grin2ab	glutamate receptor, ionotropic, N-methyl D-aspartate 2A, b	2.44e-30	3.22324
Basal Cell	hypoTH	ENSDARG00000034270	ogdha	oxoglutarate (alpha-ketoglutarate) dehydrogenase a (lipoamide)	4.01e-30	0.509023
Basal Cell	hypoTH	ENSDARG00000019810	nfe2l3	nuclear factor, erythroid 2-like 3	5.22e-30	1.43263	TF	TF_bZIP
Basal Cell	hypoTH	ENSDARG00000011449	fes	FES proto-oncogene, tyrosine kinase	6.61e-30	0.67412
Basal Cell	hypoTH	ENSDARG00000075666	tsc22d3	TSC22 domain family, member 3	6.87e-30	1.05986	TF	TSC22
Basal Cell	hypoTH	ENSDARG00000057671	epas1b	endothelial PAS domain protein 1b	8.26e-30	1.59039	TF	Others
Basal Cell	hypoTH	ENSDARG00000052139	notch3	notch receptor 3	1.11e-29	0.624971	Receptor
Basal Cell	hypoTH	ENSDARG00000099532	ubl3a	ubiquitin-like 3a	1.44e-29	0.526099
Basal Cell	hypoTH	ENSDARG00000062190	PDE3B		1.48e-29	0.569753
Basal Cell	hypoTH	ENSDARG00000013946	ivns1abpb	influenza virus NS1A binding protein b	2.58e-29	1.11496
Basal Cell	hypoTH	ENSDARG00000054916	eif4ebp3	eukaryotic translation initiation factor 4E binding protein 3	4.06e-29	1.69496
Basal Cell	hypoTH	ENSDARG00000036090	pard6gb	par-6 family cell polarity regulator gamma b	9.02e-29	0.305105
Basal Cell	hypoTH	ENSDARG00000007425	apol1	apolipoprotein L, 1	1.48e-28	1.10221
Basal Cell	hypoTH	ENSDARG00000040387	mmd	monocyte to macrophage differentiation-associated	1.87e-28	1.05777
Basal Cell	hypoTH	ENSDARG00000090797	fam222a	family with sequence similarity 222 member A	2.1e-28	1.58087
Basal Cell	hypoTH	ENSDARG00000036102	ctdsp2	CTD (carboxy-terminal domain, RNA polymerase II, polypeptide A) small phosphatase 2	2.18e-28	0.459887
Basal Cell	hypoTH	ENSDARG00000032708	arl4cb	ADP-ribosylation factor-like 4Cb	2.25e-28	1.2773
Basal Cell	hypoTH	ENSDARG00000089885	slc16a12b	solute carrier family 16 member 12b	2.41e-28	0.35068
Basal Cell	hypoTH	ENSDARG00000018788	st8sia2	ST8 alpha-N-acetyl-neuraminide alpha-2,8-sialyltransferase 2	2.56e-28	1.78638
Basal Cell	hypoTH	ENSDARG00000019525	tbcelb	tubulin folding cofactor E-like b	6.49e-28	0.555696
Basal Cell	hypoTH	ENSDARG00000036558	col18a1a	collagen type XVIII alpha 1 chain a	6.84e-28	0.19239	Ligand
Basal Cell	hypoTH	ENSDARG00000022995	clic4	chloride intracellular channel 4	7.4e-28	1.28478
Basal Cell	hypoTH	ENSDARG00000060306	tfcp2	transcription factor CP2	7.7e-28	0.828339	TF	CP2
Basal Cell	hypoTH	ENSDARG00000103277	cyp24a1	cytochrome P450, family 24, subfamily A, polypeptide 1	1.14e-27	2.77499
Basal Cell	hypoTH	ENSDARG00000099566	lmbrd2a	LMBR1 domain containing 2a	1.15e-27	0.602218
Basal Cell	hypoTH	ENSDARG00000055792	foxo4	forkhead box O4	1.42e-27	0.975719	TF	Fork_head
Basal Cell	hypoTH	ENSDARG00000068214	ccni	cyclin I	1.94e-27	0.573049
Basal Cell	hypoTH	ENSDARG00000067719	wwtr1	WW domain containing transcription regulator 1	2.05e-27	0.52012	TF-cofactor	WW
Basal Cell	hypoTH	ENSDARG00000025428	socs3a	suppressor of cytokine signaling 3a	2.16e-27	0.921239
Basal Cell	hypoTH	ENSDARG00000037099	irs2a	insulin receptor substrate 2a	2.65e-27	0.985633
Basal Cell	hypoTH	ENSDARG00000017676	mmp2	matrix metallopeptidase 2	2.81e-27	0.42074	Ligand
Basal Cell	hypoTH	ENSDARG00000076826	dpp6a	dipeptidyl-peptidase 6a	2.81e-27	1.62193
Basal Cell	hypoTH	ENSDARG00000036588	mhc1zba	major histocompatibility complex class I ZBA	3.14e-27	0.661857
Basal Cell	hypoTH	ENSDARG00000002249	tbxas1	thromboxane A synthase 1 (platelet)	3.56e-27	0.465876
Basal Cell	hypoTH	ENSDARG00000016532	suco	SUN domain containing ossification factor	3.6e-27	0.350412
Basal Cell	hypoTH	ENSDARG00000006601	kaznb	kazrin, periplakin interacting protein b	4.47e-27	0.597635
Basal Cell	hypoTH	ENSDARG00000092553	slc25a5	solute carrier family 25 member 5	6.39e-27	0.420608
Basal Cell	hypoTH	ENSDARG00000028878	vipr1a	vasoactive intestinal peptide receptor 1a	6.84e-27	0.806719	Receptor
Basal Cell	hypoTH	ENSDARG00000012574	slkb	STE20-like kinase b	1.25e-26	0.955334
Basal Cell	hypoTH	ENSDARG00000079912	rapgefl1	Rap guanine nucleotide exchange factor (GEF)-like 1	1.64e-26	0.394195
Basal Cell	hypoTH	ENSDARG00000022085	si:dkey-34e4.1	si:dkey-34e4.1	1.93e-26	0.983652
Basal Cell	hypoTH	ENSDARG00000074378	junba	JunB proto-oncogene, AP-1 transcription factor subunit a	3.06e-26	2.23755	TF	TF_bZIP
Basal Cell	hypoTH	ENSDARG00000092947	cyt1	type I cytokeratin, enveloping layer	3.68e-26	0.942407
Basal Cell	hypoTH	ENSDARG00000019963	sfxn1	sideroflexin 1	3.85e-26	1.0676
Basal Cell	hypoTH	ENSDARG00000103917	znf185	zinc finger protein 185 with LIM domain	4.21e-26	0.513309
Basal Cell	hypoTH	ENSDARG00000102887	abhd4	abhydrolase domain containing 4	6.16e-26	0.910371
Basal Cell	hypoTH	ENSDARG00000010047	neu3.2	sialidase 3 (membrane sialidase), tandem duplicate 2	9.37e-26	1.05483
Basal Cell	hypoTH	ENSDARG00000079555	ccdc85cb	coiled-coil domain containing 85C, b	1.49e-25	0.846989
Basal Cell	hypoTH	ENSDARG00000021739	klhl24a	kelch-like family member 24a	1.5e-25	1.01488
Basal Cell	hypoTH	ENSDARG00000060661	klf8	Kruppel-like factor 8	1.66e-25	0.419317	TF	zf-C2H2
Basal Cell	hypoTH	ENSDARG00000069708	cdc34a	cell division cycle 34 homolog (S. cerevisiae) a	1.73e-25	0.575188
Basal Cell	hypoTH	ENSDARG00000056499	ca6	carbonic anhydrase VI	1.88e-25	0.603206
Basal Cell	hypoTH	ENSDARG00000098802	map7d1a	MAP7 domain containing 1a	2.19e-25	0.367012
Basal Cell	hypoTH	ENSDARG00000020086	nuak1a	NUAK family, SNF1-like kinase, 1a	2.26e-25	2.04633
Basal Cell	hypoTH	ENSDARG00000100742	reep5	receptor accessory protein 5	2.46e-25	0.611641
Basal Cell	hypoTH	ENSDARG00000104693	il6st	interleukin 6 signal transducer	2.93e-25	0.76872	Receptor
Basal Cell	hypoTH	ENSDARG00000061752	ripor2	RHO family interacting cell polarization regulator 2	3.13e-25	0.452486
Basal Cell	hypoTH	ENSDARG00000054423	slc7a6	solute carrier family 7 member 6	4.15e-25	1.05026
Basal Cell	hypoTH	ENSDARG00000062304	pdpk1a	3-phosphoinositide dependent protein kinase 1a	4.42e-25	0.971826
Basal Cell	hypoTH	ENSDARG00000031317	ppdpfb	pancreatic progenitor cell differentiation and proliferation factor b	4.51e-25	1.64654
Basal Cell	hypoTH	ENSDARG00000037097	slc7a2	solute carrier family 7 member 2	6.48e-25	0.826081
Basal Cell	hypoTH	ENSDARG00000087375	zgc:66473	zgc:66473	6.99e-25	1.36131
Basal Cell	hypoTH	ENSDARG00000070606	ikbke	inhibitor of nuclear factor kappa B kinase subunit epsilon	8.64e-25	0.726589
Basal Cell	hypoTH	ENSDARG00000031683	fosab	v-fos FBJ murine osteosarcoma viral oncogene homolog Ab	8.68e-25	1.70033	TF	TF_bZIP
Basal Cell	hypoTH	ENSDARG00000037256	si:ch211-145b13.5	si:ch211-145b13.5	8.8e-25	1.68951
Basal Cell	hypoTH	ENSDARG00000078399	acsl2	acyl-CoA synthetase long chain family member 2	9.08e-25	0.821902
Basal Cell	hypoTH	ENSDARG00000012449	si:ch211-169p10.1	si:ch211-169p10.1	1.16e-24	0.86768
Basal Cell	hypoTH	ENSDARG00000028213	ttn.2	titin, tandem duplicate 2	1.21e-24	0.646764
Basal Cell	hypoTH	ENSDARG00000014587	slc38a5b	solute carrier family 38 member 5b	1.3e-24	0.339283
Basal Cell	hypoTH	ENSDARG00000060103	cpeb3	cytoplasmic polyadenylation element binding protein 3	1.31e-24	0.544002
Basal Cell	hypoTH	ENSDARG00000067741	itpkcb	inositol-trisphosphate 3-kinase Cb	1.33e-24	0.251984
Basal Cell	hypoTH	ENSDARG00000063474	arfgef1	ADP-ribosylation factor guanine nucleotide-exchange factor 1 (brefeldin A-inhibited)	1.45e-24	0.374914
Basal Cell	hypoTH	ENSDARG00000063037	lipea	lipase, hormone-sensitive a	1.66e-24	0.988629
Basal Cell	hypoTH	ENSDARG00000079056	si:ch211-194c3.5	si:ch211-194c3.5	1.91e-24	0.53256
Basal Cell	hypoTH	ENSDARG00000035652	sat1a.1	spermidine/spermine N1-acetyltransferase 1a, duplicate 1	2.27e-24	0.365294
Basal Cell	hypoTH	ENSDARG00000003820	nr1d2a	nuclear receptor subfamily 1, group D, member 2a	2.85e-24	0.337098	TF	THR-like
Basal Cell	hypoTH	ENSDARG00000069433	tnk1	tyrosine kinase, non-receptor, 1	3.27e-24	0.777846
Basal Cell	hypoTH	ENSDARG00000009783	slc49a4	solute carrier family 49 member 4	3.49e-24	0.620904
Basal Cell	hypoTH	ENSDARG00000052690	arrdc3a	arrestin domain containing 3a	3.81e-24	0.611688
Basal Cell	hypoTH	ENSDARG00000053878	inpp5l	inositol polyphosphate-5-phosphatase L	4.92e-24	0.563014
Basal Cell	hypoTH	ENSDARG00000020497	rab7a	RAB7a, member RAS oncogene family	1.06e-23	0.552888
Basal Cell	hypoTH	ENSDARG00000032765	net1	neuroepithelial cell transforming 1	1.18e-23	0.540777
Basal Cell	hypoTH	ENSDARG00000056922	ltbp1	latent transforming growth factor beta binding protein 1	1.2e-23	0.381844	Ligand
Basal Cell	hypoTH	ENSDARG00000019113	mob3a	MOB kinase activator 3A	1.24e-23	0.856513
Basal Cell	hypoTH	ENSDARG00000002847	fndc1	fibronectin type III domain containing 1	1.29e-23	1.29091
Basal Cell	hypoTH	ENSDARG00000036774	rgs12b	regulator of G protein signaling 12b	1.5e-23	0.312221
Basal Cell	hypoTH	ENSDARG00000035175	schip1	schwannomin interacting protein 1	1.54e-23	0.420344
Basal Cell	hypoTH	ENSDARG00000027744	gadd45ba	growth arrest and DNA-damage-inducible, beta a	1.65e-23	1.0304
Basal Cell	hypoTH	ENSDARG00000024017	mdga2a	MAM domain containing glycosylphosphatidylinositol anchor 2a	2.09e-23	1.3448
Basal Cell	hypoTH	ENSDARG00000105187	gcshb	glycine cleavage system protein H (aminomethyl carrier), b	2.29e-23	1.22143
Basal Cell	hypoTH	ENSDARG00000039225	vps13a	vacuolar protein sorting 13 homolog A	2.81e-23	0.388534
Basal Cell	hypoTH	ENSDARG00000016188	SBNO2		3.03e-23	0.418549
Basal Cell	hypoTH	ENSDARG00000057767	nudt4a	nudix (nucleoside diphosphate linked moiety X)-type motif 4a	3.25e-23	0.470915
Basal Cell	hypoTH	ENSDARG00000040623	fosl2	fos-like antigen 2	3.37e-23	0.82117	TF	TF_bZIP
Basal Cell	hypoTH	ENSDARG00000003313	eps8l1b	eps8 like 1b	4.04e-23	0.584492
Basal Cell	hypoTH	ENSDARG00000068258	lrch4	leucine-rich repeats and calponin homology (CH) domain containing 4	4.04e-23	0.396271
Basal Cell	hypoTH	ENSDARG00000074168	tasor2	transcription activation suppressor family member 2	4.42e-23	0.401795
Basal Cell	hypoTH	ENSDARG00000032619	tob1a	transducer of ERBB2, 1a	4.57e-23	0.802594	TF-cofactor	Others
Basal Cell	hypoTH	ENSDARG00000099197	actc1b	actin alpha cardiac muscle 1b	6.05e-23	0.74307
Basal Cell	hypoTH	ENSDARG00000000563	ttn.1	titin, tandem duplicate 1	7.05e-23	0.676153
Basal Cell	hypoTH	ENSDARG00000036695	calcoco1a	calcium binding and coiled-coil domain 1a	8.41e-23	0.780131	TF-cofactor	Others
Basal Cell	hypoTH	ENSDARG00000013310	map3k15	mitogen-activated protein kinase kinase kinase 15	1.12e-22	0.458014
Basal Cell	hypoTH	ENSDARG00000009488	gipc2	GIPC PDZ domain containing family, member 2	1.17e-22	0.67477
Basal Cell	hypoTH	ENSDARG00000002196	bach1b	BTB and CNC homology 1, basic leucine zipper transcription factor 1 b	1.35e-22	1.01429	TF	TF_bZIP
Basal Cell	hypoTH	ENSDARG00000005350	dip2ba	disco-interacting protein 2 homolog Ba	1.39e-22	0.337256
Basal Cell	hypoTH	ENSDARG00000077400	rbm10	RNA binding motif protein 10	1.5e-22	0.980875
Basal Cell	hypoTH	ENSDARG00000017320	f11r.1	F11 receptor, tandem duplicate 1	1.83e-22	0.513994	Receptor
Basal Cell	hypoTH	ENSDARG00000057053	zgc:91976	zgc:91976	1.85e-22	0.402906
Basal Cell	hypoTH	ENSDARG00000042708	tuba8l	tubulin, alpha 8 like	2.79e-22	0.611081
Basal Cell	hypoTH	ENSDARG00000058570	ccl27a	chemokine (C-C motif) ligand 27a	3.8e-22	1.4417
Basal Cell	hypoTH	ENSDARG00000056186	eif5a2	eukaryotic translation initiation factor 5A2	4.31e-22	0.582916
Basal Cell	hypoTH	ENSDARG00000007691	cul1b	cullin 1b	5.64e-22	0.54585
Basal Cell	hypoTH	ENSDARG00000005108	oclna	occludin a	6.78e-22	0.6361	Receptor
Basal Cell	hypoTH	ENSDARG00000056396	dusp22a	dual specificity phosphatase 22a	7.58e-22	0.953204
Basal Cell	hypoTH	ENSDARG00000059719	fam169aa	family with sequence similarity 169 member Aa	8.03e-22	0.345897
Basal Cell	hypoTH	ENSDARG00000012789	plek2	pleckstrin 2	1.03e-21	0.437034
Basal Cell	hypoTH	ENSDARG00000039863	lifrb	LIF receptor subunit alpha b	1.07e-21	1.16515
Basal Cell	hypoTH	ENSDARG00000009499	syne1a	spectrin repeat containing, nuclear envelope 1a	1.32e-21	0.835172
Basal Cell	hypoTH	ENSDARG00000074531	spag9a	sperm associated antigen 9a	1.44e-21	0.845592
Basal Cell	hypoTH	ENSDARG00000075296	fam83c	family with sequence similarity 83 member C	1.58e-21	0.585459
Basal Cell	hypoTH	ENSDARG00000007244	acp2	acid phosphatase 2, lysosomal	2.04e-21	1.21452
Basal Cell	hypoTH	ENSDARG00000006283	waslb	WASP like actin nucleation promoting factor b	2.64e-21	0.416771
Basal Cell	hypoTH	ENSDARG00000035598	coro1ca	coronin, actin binding protein, 1Ca	2.66e-21	0.221112
Basal Cell	hypoTH	ENSDARG00000015862	rpl5b	ribosomal protein L5b	3.09e-21	0.505106
Basal Cell	hypoTH	ENSDARG00000078619	pnp5a	purine nucleoside phosphorylase 5a	3.76e-21	0.528346
Basal Cell	hypoTH	ENSDARG00000005220	pdcd6	programmed cell death 6	4.03e-21	0.414544
Basal Cell	hypoTH	ENSDARG00000096927	si:ch211-210b2.3	si:ch211-210b2.3	4.33e-21	1.57738
Basal Cell	hypoTH	ENSDARG00000006260	tuba8l4	tubulin, alpha 8 like 4	5.31e-21	0.442068
Basal Cell	hypoTH	ENSDARG00000099843	nedd4a	NEDD4 E3 ubiquitin protein ligase a	5.85e-21	0.432752
Basal Cell	hypoTH	ENSDARG00000086103	slc37a1	solute carrier family 37 member 1	6.23e-21	0.94988	Receptor
Basal Cell	hypoTH	ENSDARG00000041505	itm2bb	integral membrane protein 2Bb	7.62e-21	0.303277
Basal Cell	hypoTH	ENSDARG00000056259	tmem131	transmembrane protein 131	1.07e-20	0.389499
Basal Cell	hypoTH	ENSDARG00000078615	CABZ01085419.1		1.09e-20	0.463377
Basal Cell	hypoTH	ENSDARG00000004227	pde3a	phosphodiesterase 3A, cGMP-inhibited	1.45e-20	0.926516
Basal Cell	hypoTH	ENSDARG00000059558	tecta	tectorin alpha	1.86e-20	1.00569
Basal Cell	hypoTH	ENSDARG00000020107	usp2a	ubiquitin specific peptidase 2a	2.47e-20	0.764788
Basal Cell	hypoTH	ENSDARG00000102825	olfm2b	olfactomedin 2b	2.56e-20	1.50047
Basal Cell	hypoTH	ENSDARG00000009106	serinc1	serine incorporator 1	2.6e-20	0.564039
Basal Cell	hypoTH	ENSDARG00000077284	gdpd5a	glycerophosphodiester phosphodiesterase domain containing 5a	2.6e-20	1.04716
Basal Cell	hypoTH	ENSDARG00000019808	evpla	envoplakin a	2.85e-20	0.38623
Basal Cell	hypoTH	ENSDARG00000061640	sipa1l2	signal-induced proliferation-associated 1 like 2	2.94e-20	0.349639
Basal Cell	hypoTH	ENSDARG00000053272	RAP1GAP		3.05e-20	1.21625
Basal Cell	hypoTH	ENSDARG00000016551	iqsec1b	IQ motif and Sec7 domain 1b	3.26e-20	0.277913
Basal Cell	hypoTH	ENSDARG00000012944	myhz2	myosin, heavy polypeptide 2, fast muscle specific	3.82e-20	1.17837
Basal Cell	hypoTH	ENSDARG00000017211	plxnb1b	plexin b1b	4.16e-20	0.429573	Receptor
Basal Cell	hypoTH	ENSDARG00000078250	zgc:194398	zgc:194398	5.39e-20	0.457851
Basal Cell	hypoTH	ENSDARG00000009505	prelid3b	PRELI domain containing 3	5.96e-20	0.6381
Basal Cell	hypoTH	ENSDARG00000057452	ston2	stonin 2	6.65e-20	0.435816
Basal Cell	hypoTH	ENSDARG00000061566	slc7a3b	solute carrier family 7 member 3b	8.76e-20	1.76297
Basal Cell	hypoTH	ENSDARG00000003381	si:ch211-266g18.6	si:ch211-266g18.6	8.93e-20	0.669253
Basal Cell	hypoTH	ENSDARG00000019230	rpl7a	ribosomal protein L7a	1.35e-19	0.378426
Basal Cell	hypoTH	ENSDARG00000030616	nfe2l1a	nuclear factor, erythroid 2-like 1a	1.53e-19	1.69516	TF	TF_bZIP
Basal Cell	hypoTH	ENSDARG00000020395	mical2b	microtubule associated monooxygenase, calponin and LIM domain containing 2b	1.53e-19	0.747316
Basal Cell	hypoTH	ENSDARG00000017294	gnai2b	guanine nucleotide binding protein (G protein), alpha inhibiting activity polypeptide 2b	2e-19	0.502733	Ligand
Basal Cell	hypoTH	ENSDARG00000063309	tjp2a	tight junction protein 2a (zona occludens 2)	2.48e-19	0.354257
Basal Cell	hypoTH	ENSDARG00000020488	arhgap17a	Rho GTPase activating protein 17a	2.77e-19	0.424491
Basal Cell	hypoTH	ENSDARG00000075230	tet1	tet methylcytosine dioxygenase 1	3.56e-19	0.441638
Basal Cell	hypoTH	ENSDARG00000044254	anxa3b	annexin A3b	4.07e-19	0.860703
Basal Cell	hypoTH	ENSDARG00000004177	fam169ab	family with sequence similarity 169 member Ab	4.25e-19	1.53199
Basal Cell	hypoTH	ENSDARG00000062933	cmip	c-Maf inducing protein	5.65e-19	0.516339
Basal Cell	hypoTH	ENSDARG00000069619	atf7ip	activating transcription factor 7 interacting protein	6.01e-19	0.399759
Basal Cell	hypoTH	ENSDARG00000086056	plekhg6	pleckstrin homology domain containing, family G (with RhoGef domain) member 6	6.12e-19	0.855731
Basal Cell	hypoTH	ENSDARG00000101443	relch	RAB11 binding and LisH domain, coiled-coil and HEAT repeat containing	6.4e-19	0.536033
Basal Cell	hypoTH	ENSDARG00000078172	CU984600.1		6.94e-19	0.389958
Basal Cell	hypoTH	ENSDARG00000006791	arntl1a	aryl hydrocarbon receptor nuclear translocator-like 1a	7.25e-19	1.38776	TF	bHLH
Basal Cell	hypoTH	ENSDARG00000061226	timp2a	TIMP metallopeptidase inhibitor 2a	8.24e-19	0.617087	Ligand
Basal Cell	hypoTH	ENSDARG00000041217	xpo6	exportin 6	9.4e-19	0.389558
Basal Cell	hypoTH	ENSDARG00000058730	rdh10a	retinol dehydrogenase 10a	9.44e-19	1.64419
Basal Cell	hypoTH	ENSDARG00000068992	hspa8	heat shock protein 8	1.51e-18	0.256913	TF-cofactor	Heat shock protein
Basal Cell	hypoTH	ENSDARG00000005513	naca	nascent polypeptide associated complex subunit alpha	1.64e-18	0.488152
Basal Cell	hypoTH	ENSDARG00000095200	si:ch211-197e7.1	si:ch211-197e7.1	1.7e-18	1.57965
Basal Cell	hypoTH	ENSDARG00000008165	caspa	caspase a	1.8e-18	1.04174
Basal Cell	hypoTH	ENSDARG00000054124	htr1d	5-hydroxytryptamine (serotonin) receptor 1D, G protein-coupled	2.34e-18	1.87645	Receptor
Basal Cell	hypoTH	ENSDARG00000086623	vav3a	vav 3 guanine nucleotide exchange factor a	2.64e-18	0.70329
Basal Cell	hypoTH	ENSDARG00000056050	kctd17	potassium channel tetramerization domain containing 17	2.77e-18	0.773221
Basal Cell	hypoTH	ENSDARG00000057231	rorca	RAR-related orphan receptor C a	3.23e-18	0.998612	TF	THR-like
Basal Cell	hypoTH	ENSDARG00000056477	ccdc125	coiled-coil domain containing 125	3.56e-18	1.04148
Basal Cell	hypoTH	ENSDARG00000076689	gramd1a	GRAM domain containing 1A	4.67e-18	0.398108
Basal Cell	hypoTH	ENSDARG00000059177	tax1bp3	Tax1 (human T-cell leukemia virus type I) binding protein 3	6.32e-18	0.654736
Basal Cell	hypoTH	ENSDARG00000105255	zbtb4	zinc finger and BTB domain containing 4	6.62e-18	1.12378	TF	zf-C2H2
Basal Cell	hypoTH	ENSDARG00000034528	chodl	chondrolectin	7.48e-18	2.18883
Basal Cell	hypoTH	ENSDARG00000061352	bcl11aa	BAF chromatin remodeling complex subunit BCL11A a	7.61e-18	0.349592	TF	zf-C2H2
Basal Cell	hypoTH	ENSDARG00000103505	fbxl3a	F-box and leucine-rich repeat protein 3a	7.93e-18	1.00423
Basal Cell	hypoTH	ENSDARG00000040705	glsb	glutaminase b	7.97e-18	0.547084
Basal Cell	hypoTH	ENSDARG00000062082	hipk3b	homeodomain interacting protein kinase 3b	9.33e-18	0.378239	TF-cofactor	HIPK
Basal Cell	hypoTH	ENSDARG00000045522	acot15	acyl-CoA thioesterase 15	1.11e-17	0.951315
Basal Cell	hypoTH	ENSDARG00000035132	rgs3b	regulator of G protein signaling 3b	1.14e-17	1.65911
Basal Cell	hypoTH	ENSDARG00000077506	tjp1a	tight junction protein 1a	1.16e-17	0.460175
Basal Cell	hypoTH	ENSDARG00000045676	calua	calumenin a	1.34e-17	0.877332
Basal Cell	hypoTH	ENSDARG00000011405	rps9	ribosomal protein S9	1.45e-17	0.386971
Basal Cell	hypoTH	ENSDARG00000017235	eif5a	eukaryotic translation initiation factor 5A	1.54e-17	0.468252
Basal Cell	hypoTH	ENSDARG00000056836	si:ch211-125o16.4	si:ch211-125o16.4	1.58e-17	0.476046
Basal Cell	hypoTH	ENSDARG00000104815	lmx1ba	LIM homeobox transcription factor 1, beta a	1.76e-17	0.596028	TF	Homeobox
Basal Cell	hypoTH	ENSDARG00000087893	rnf216	ring finger protein 216	2.26e-17	0.511778
Basal Cell	hypoTH	ENSDARG00000056695	phc2a	polyhomeotic homolog 2a (Drosophila)	2.35e-17	0.455347
Basal Cell	hypoTH	ENSDARG00000015722	kctd5a	potassium channel tetramerization domain containing 5a	2.6e-17	0.565329
Basal Cell	hypoTH	ENSDARG00000027316	tcp11l2	t-complex 11, testis-specific-like 2	2.79e-17	0.860528
Basal Cell	hypoTH	ENSDARG00000016443	eif3c	eukaryotic translation initiation factor 3, subunit C	2.87e-17	0.564655
Basal Cell	hypoTH	ENSDARG00000063153	bcl11ab	BAF chromatin remodeling complex subunit BCL11A b	3.08e-17	0.471237	TF	zf-C2H2
Basal Cell	hypoTH	ENSDARG00000100131	cdh29	cadherin 29	4.26e-17	0.471817
Basal Cell	hypoTH	ENSDARG00000086789	bahd1	bromo adjacent homology domain containing 1	4.3e-17	0.485443
Basal Cell	hypoTH	ENSDARG00000100515	dusp1	dual specificity phosphatase 1	4.89e-17	1.43541
Basal Cell	hypoTH	ENSDARG00000025218	myo5ab	myosin VAb	5.35e-17	0.450977
Basal Cell	hypoTH	ENSDARG00000079895	ehbp1l1b	EH domain binding protein 1-like 1b	5.53e-17	1.05237
Basal Cell	hypoTH	ENSDARG00000025269	pdcd6ip	programmed cell death 6 interacting protein	5.62e-17	0.473648
Basal Cell	hypoTH	ENSDARG00000099240	acap3b	ArfGAP with coiled-coil, ankyrin repeat and PH domains 3b	5.91e-17	0.325835
Basal Cell	hypoTH	ENSDARG00000045486	pawr	PRKC, apoptosis, WT1, regulator	5.96e-17	0.249717	TF-cofactor	Others
Basal Cell	hypoTH	ENSDARG00000006202	erbb3a	erb-b2 receptor tyrosine kinase 3a	5.99e-17	0.619811	Receptor
Basal Cell	hypoTH	ENSDARG00000053232	itgb1b.1	integrin, beta 1b.1	6.3e-17	0.635973	Receptor
Basal Cell	hypoTH	ENSDARG00000051783	rplp0	ribosomal protein, large, P0	6.4e-17	0.332676
Basal Cell	hypoTH	ENSDARG00000063097	scube1	signal peptide, CUB domain, EGF-like 1	7.08e-17	1.64688
Basal Cell	hypoTH	ENSDARG00000076924	als2b	alsin Rho guanine nucleotide exchange factor ALS2 b	7.12e-17	0.801681
Basal Cell	hypoTH	ENSDARG00000044251	rasgef1bb	RasGEF domain family, member 1Bb	7.76e-17	0.804377
Basal Cell	hypoTH	ENSDARG00000102059	RGS13		8.37e-17	0.62757
Basal Cell	hypoTH	ENSDARG00000028017	tp53inp1	tumor protein p53 inducible nuclear protein 1	9.34e-17	0.6203
Basal Cell	hypoTH	ENSDARG00000062263	arhgap17b	Rho GTPase activating protein 17b	1.02e-16	0.279199
Basal Cell	hypoTH	ENSDARG00000078041	xpo1a	exportin 1 (CRM1 homolog, yeast) a	1.31e-16	0.759751
Basal Cell	hypoTH	ENSDARG00000040971	zgc:92606	zgc:92606	1.81e-16	0.841705
Basal Cell	hypoTH	ENSDARG00000103739	bahcc1a	BAH domain and coiled-coil containing 1a	2e-16	0.362248	TF-cofactor	Others
Basal Cell	hypoTH	ENSDARG00000067958	sh3gl1a	SH3-domain GRB2-like 1a	2.29e-16	0.34255
Basal Cell	hypoTH	ENSDARG00000113572	si:dkey-102c8.3	si:dkey-102c8.3	2.32e-16	0.489073
Basal Cell	hypoTH	ENSDARG00000078841	si:ch211-195b13.6	si:ch211-195b13.6	2.39e-16	2.67854
Basal Cell	hypoTH	ENSDARG00000052104	atg4b	autophagy related 4B, cysteine peptidase	2.43e-16	0.93943
Basal Cell	hypoTH	ENSDARG00000053804	osbpl2a	oxysterol binding protein-like 2a	3.61e-16	0.875645
Basal Cell	hypoTH	ENSDARG00000018721	npnta	nephronectin a	3.72e-16	0.349356	Ligand
Basal Cell	hypoTH	ENSDARG00000015970	phip	pleckstrin homology domain interacting protein	3.75e-16	0.611776
Basal Cell	hypoTH	ENSDARG00000035957	gmnn	geminin DNA replication inhibitor	4.75e-16	0.667023
Basal Cell	hypoTH	ENSDARG00000113074	CU468723.2		4.89e-16	0.861384
Basal Cell	hypoTH	ENSDARG00000090764	bcas3	BCAS3 microtubule associated cell migration factor	6.34e-16	0.240043	TF-cofactor	Others
Basal Cell	hypoTH	ENSDARG00000018569	tnfrsf1a	tumor necrosis factor receptor superfamily, member 1a	6.6e-16	0.735668	Receptor
Basal Cell	hypoTH	ENSDARG00000031768	roraa	RAR-related orphan receptor A, paralog a	6.68e-16	0.560332	TF	THR-like
Basal Cell	hypoTH	ENSDARG00000002190	chmp2bb	charged multivesicular body protein 2Bb	7.28e-16	0.840153
Basal Cell	hypoTH	ENSDARG00000035458	atp2a1l	ATPase sarcoplasmic/endoplasmic reticulum Ca2+ transporting 1, like	7.39e-16	0.815551
Basal Cell	hypoTH	ENSDARG00000032098	c8g	complement component 8, gamma polypeptide	8.96e-16	1.10198
Basal Cell	hypoTH	ENSDARG00000051886	ankrd11	ankyrin repeat domain 11	9.4e-16	0.186124
Basal Cell	hypoTH	ENSDARG00000075672	pms2	PMS1 homolog 2, mismatch repair system component	9.54e-16	1.18993
Basal Cell	hypoTH	ENSDARG00000104139	atp1a3b	ATPase Na+/K+ transporting subunit alpha 3b	1.03e-15	0.978895	Receptor
Basal Cell	hypoTH	ENSDARG00000009196	anxa3a	annexin A3a	1.18e-15	1.62802
Basal Cell	hypoTH	ENSDARG00000021135	dhrs4	dehydrogenase/reductase (SDR family) member 4	1.24e-15	1.57843
Basal Cell	hypoTH	ENSDARG00000061985	rbm47	RNA binding motif protein 47	1.32e-15	0.619054
Basal Cell	hypoTH	ENSDARG00000059035	porb	P450 (cytochrome) oxidoreductase b	1.56e-15	0.32446
Basal Cell	hypoTH	ENSDARG00000016875	gys1	glycogen synthase 1 (muscle)	1.62e-15	0.947237
Basal Cell	hypoTH	ENSDARG00000037905	cacna1aa	calcium channel, voltage-dependent, P/Q type, alpha 1A subunit, a	1.63e-15	2.02684
Basal Cell	hypoTH	ENSDARG00000004325	casp9	caspase 9, apoptosis-related cysteine peptidase	1.69e-15	1.06424
Basal Cell	hypoTH	ENSDARG00000093584	zgc:193505	zgc:193505	2.12e-15	0.746617
Basal Cell	hypoTH	ENSDARG00000101438	lonp2	lon peptidase 2, peroxisomal	2.58e-15	0.712208
Basal Cell	hypoTH	ENSDARG00000103672	cirbpa	cold inducible RNA binding protein a	2.8e-15	0.403196
Basal Cell	hypoTH	ENSDARG00000063230	bmp7b	bone morphogenetic protein 7b	3.4e-15	0.333699	Ligand
Basal Cell	hypoTH	ENSDARG00000091954	si:dkeyp-122a9.1	si:dkeyp-122a9.1	3.42e-15	1.10798
Basal Cell	hypoTH	ENSDARG00000003952	pfn2	profilin 2	4.72e-15	0.436976
Basal Cell	hypoTH	ENSDARG00000039145	plaub	plasminogen activator, urokinase b	4.82e-15	0.731626	Ligand
Basal Cell	hypoTH	ENSDARG00000078797	dennd3a	DENN/MADD domain containing 3a	5e-15	1.07275
Basal Cell	hypoTH	ENSDARG00000003113	ada	adenosine deaminase	5.44e-15	0.609179
Basal Cell	hypoTH	ENSDARG00000086512	prodhb	proline dehydrogenase (oxidase) 1b	6.19e-15	0.804509
Basal Cell	hypoTH	ENSDARG00000035400	btf3	basic transcription factor 3	6.56e-15	0.469602
Basal Cell	hypoTH	ENSDARG00000003808	aqp3a	aquaporin 3a	8.68e-15	0.237647
Basal Cell	hypoTH	ENSDARG00000053104	fam102ba	family with sequence similarity 102 member Ba	1.14e-14	0.556901
Basal Cell	hypoTH	ENSDARG00000055339	si:ch73-1a9.4	si:ch73-1a9.4	1.17e-14	0.667822
Basal Cell	hypoTH	ENSDARG00000043102	lxn	latexin	1.21e-14	0.899976
Basal Cell	hypoTH	ENSDARG00000040684	plcd4b	phospholipase C, delta 4b	1.28e-14	1.69449
Basal Cell	hypoTH	ENSDARG00000025147	cd63	CD63 molecule	1.28e-14	0.581613
Basal Cell	hypoTH	ENSDARG00000073709	fam149a	family with sequence similarity 149 member A	1.33e-14	2.96064
Basal Cell	hypoTH	ENSDARG00000102332	spint1a	serine peptidase inhibitor, Kunitz type 1 a	1.52e-14	0.273939	Ligand
Basal Cell	hypoTH	ENSDARG00000036162	hnrnpa0b	heterogeneous nuclear ribonucleoprotein A0b	1.55e-14	0.484758
Basal Cell	hypoTH	ENSDARG00000006242	ptp4a1	protein tyrosine phosphatase 4A1	1.61e-14	0.528875
Basal Cell	hypoTH	ENSDARG00000059247	tmem54a	transmembrane protein 54a	1.63e-14	0.480809
Basal Cell	hypoTH	ENSDARG00000014465	arhgef25b	Rho guanine nucleotide exchange factor (GEF) 25b	1.64e-14	2.01546
Basal Cell	hypoTH	ENSDARG00000097205	ulk2	unc-51 like autophagy activating kinase 2	1.7e-14	0.44191
Basal Cell	hypoTH	ENSDARG00000006491	agpat9l	1-acylglycerol-3-phosphate O-acyltransferase 9, like	1.71e-14	0.426933
Basal Cell	hypoTH	ENSDARG00000003017	ube2al	ubiquitin conjugating enzyme E2 A, like	1.78e-14	0.952084
Basal Cell	hypoTH	ENSDARG00000014646	aoc2	amine oxidase copper containing 2	1.79e-14	0.66836
Basal Cell	hypoTH	ENSDARG00000079840	kcnma1a	potassium large conductance calcium-activated channel, subfamily M, alpha member 1a	2.11e-14	0.635823
Basal Cell	hypoTH	ENSDARG00000103980	ets2	v-ets avian erythroblastosis virus E26 oncogene homolog 2	2.27e-14	0.609993	TF	ETS
Basal Cell	hypoTH	ENSDARG00000100420	tpcn2	two pore segment channel 2	2.34e-14	0.63935
Basal Cell	hypoTH	ENSDARG00000044525	pparda	peroxisome proliferator-activated receptor delta a	2.49e-14	1.16544	TF	THR-like
Basal Cell	hypoTH	ENSDARG00000013575	rfx2	regulatory factor X, 2 (influences HLA class II expression)	2.57e-14	0.492218	TF	RFX
Basal Cell	hypoTH	ENSDARG00000088967	wnk4b	WNK lysine deficient protein kinase 4b	2.73e-14	0.46359
Basal Cell	hypoTH	ENSDARG00000098350	mxd3	MAX dimerization protein 3	3.09e-14	1.3572	TF	bHLH
Basal Cell	hypoTH	ENSDARG00000012390	kcnk5b	potassium channel, subfamily K, member 5b	3.53e-14	1.08187
Basal Cell	hypoTH	ENSDARG00000076104	sema4bb	sema domain, immunoglobulin domain (Ig), transmembrane domain (TM) and short cytoplasmic domain, (semaphorin) 4Bb	4.88e-14	0.697951	Ligand
Basal Cell	hypoTH	ENSDARG00000042627	nhsl1b	NHS-like 1b	5.07e-14	0.244184
Basal Cell	hypoTH	ENSDARG00000022176	IGLON5		6.7e-14	0.831208
Basal Cell	hypoTH	ENSDARG00000077762	si:rp71-79p20.2	si:rp71-79p20.2	7.04e-14	0.360967
Basal Cell	hypoTH	ENSDARG00000042856	itpka	inositol-trisphosphate 3-kinase A	7.6e-14	0.374045
Basal Cell	hypoTH	ENSDARG00000011890	cry4	cryptochrome circadian regulator 4	8.26e-14	1.28362
Basal Cell	hypoTH	ENSDARG00000095184	si:ch73-52p7.1	si:ch73-52p7.1	8.35e-14	1.2851
Basal Cell	hypoTH	ENSDARG00000063358	micu1	mitochondrial calcium uptake 1	8.73e-14	0.277414
Basal Cell	hypoTH	ENSDARG00000040100	si:dkey-95h12.1	si:dkey-95h12.1	9.26e-14	0.507692
Basal Cell	hypoTH	ENSDARG00000015273	alpi.1	alkaline phosphatase, intestinal, tandem duplicate 1	9.28e-14	0.706109
Basal Cell	hypoTH	ENSDARG00000056767	itgb3a	integrin beta 3a	1e-13	0.295127
Basal Cell	hypoTH	ENSDARG00000058038	eml3	EMAP like 3	1.08e-13	0.419831
Basal Cell	hypoTH	ENSDARG00000088672	zmp:0000000936	zmp:0000000936	1.12e-13	0.368411
Basal Cell	hypoTH	ENSDARG00000039082	zgc:123010	zgc:123010	1.24e-13	0.455836
Basal Cell	hypoTH	ENSDARG00000070583	itpk1b	inositol-tetrakisphosphate 1-kinase b	1.24e-13	0.325509
Basal Cell	hypoTH	ENSDARG00000098466	ube2a	ubiquitin-conjugating enzyme E2A (RAD6 homolog)	1.72e-13	0.981171
Basal Cell	hypoTH	ENSDARG00000053047	eif2s2	eukaryotic translation initiation factor 2, subunit 2 beta	1.98e-13	0.563407
Basal Cell	hypoTH	ENSDARG00000021720	col7a1	collagen, type VII, alpha 1	2.09e-13	0.25335	Ligand
Basal Cell	hypoTH	ENSDARG00000070487	zgc:110783	zgc:110783	2.16e-13	1.08372
Basal Cell	hypoTH	ENSDARG00000095912	si:dkey-229b18.3	si:dkey-229b18.3	2.34e-13	0.814366
Basal Cell	hypoTH	ENSDARG00000075752	myo18aa	myosin XVIIIAa	2.49e-13	0.902251
Basal Cell	hypoTH	ENSDARG00000053254	mylpfa	myosin light chain, phosphorylatable, fast skeletal muscle a	2.53e-13	0.615333
Basal Cell	hypoTH	ENSDARG00000058666	dennd2da	DENN/MADD domain containing 2Da	2.55e-13	0.239066
Basal Cell	hypoTH	ENSDARG00000091367	prpf6	PRP6 pre-mRNA processing factor 6 homolog (S. cerevisiae)	2.64e-13	0.585399	TF-cofactor	Others
Basal Cell	hypoTH	ENSDARG00000076171	znf827	zinc finger protein 827	2.83e-13	0.332856	TF	zf-C2H2
Basal Cell	hypoTH	ENSDARG00000005754	ptprfb	protein tyrosine phosphatase receptor type Fb	3.2e-13	0.155299	Receptor
Basal Cell	hypoTH	ENSDARG00000045608	tafa5b	TAFA chemokine like family member 5b	3.41e-13	1.54065
Basal Cell	hypoTH	ENSDARG00000037861	slc2a3b	solute carrier family 2 member 3b	3.96e-13	0.704833
Basal Cell	hypoTH	ENSDARG00000068912	zgc:153012	zgc:153012	5.07e-13	0.470982
Basal Cell	hypoTH	ENSDARG00000007275	si:ch211-251b21.1	si:ch211-251b21.1	5.14e-13	1.06062
Basal Cell	hypoTH	ENSDARG00000058818	rbm38	RNA binding motif protein 38	5.62e-13	0.729758
Basal Cell	hypoTH	ENSDARG00000019098	cd82a	CD82 molecule a	6.27e-13	0.890109	Receptor
Basal Cell	hypoTH	ENSDARG00000009040	si:ch73-141c7.1	si:ch73-141c7.1	7.77e-13	0.991645
Basal Cell	hypoTH	ENSDARG00000014962	ppp3cca	protein phosphatase 3, catalytic subunit, gamma isozyme, a	7.9e-13	0.319229
Basal Cell	hypoTH	ENSDARG00000094557	nupr1b	nuclear protein 1b	8.69e-13	1.1401
Basal Cell	hypoTH	ENSDARG00000076667	ccng1	cyclin G1	1.12e-12	0.468718
Basal Cell	hypoTH	ENSDARG00000060249	wdr44	WD repeat domain 44	1.22e-12	0.503732
Basal Cell	hypoTH	ENSDARG00000032932	cnksr1	connector enhancer of kinase suppressor of Ras 1	1.41e-12	0.302678
Basal Cell	hypoTH	ENSDARG00000053091	si:ch211-204c21.1	si:ch211-204c21.1	1.44e-12	0.607198
Basal Cell	hypoTH	ENSDARG00000057644	adam8b	ADAM metallopeptidase domain 8b	1.62e-12	0.399725
Basal Cell	hypoTH	ENSDARG00000071095	abi3bpb	ABI family, member 3 (NESH) binding protein b	1.68e-12	0.608107
Basal Cell	hypoTH	ENSDARG00000043658	cxadr	CXADR Ig-like cell adhesion molecule	1.76e-12	0.542892
Basal Cell	hypoTH	ENSDARG00000035869	azin1b	antizyme inhibitor 1b	1.8e-12	0.356099
Basal Cell	hypoTH	ENSDARG00000091293	dmxl2	Dmx-like 2	1.96e-12	0.42044
Basal Cell	hypoTH	ENSDARG00000086458	hdac10	histone deacetylase 10	2.03e-12	1.26451	TF-cofactor	Histone deacetylase
Basal Cell	hypoTH	ENSDARG00000013623	vdac2	voltage-dependent anion channel 2	2.06e-12	0.47159
Basal Cell	hypoTH	ENSDARG00000045399	cct5	chaperonin containing TCP1, subunit 5 (epsilon)	2.4e-12	0.698176
Basal Cell	hypoTH	ENSDARG00000077897	znf296	zinc finger protein 296	2.77e-12	0.609491	TF	zf-C2H2
Basal Cell	hypoTH	ENSDARG00000069142	aars	alanyl-tRNA synthetase	2.79e-12	0.573815
Basal Cell	hypoTH	ENSDARG00000075349	si:ch73-138n13.1	si:ch73-138n13.1	2.87e-12	0.341881
Basal Cell	hypoTH	ENSDARG00000036414	si:ch73-335l21.1	si:ch73-335l21.1	2.89e-12	0.191961
Basal Cell	hypoTH	ENSDARG00000102291	eef1da	eukaryotic translation elongation factor 1 delta a (guanine nucleotide exchange protein)	3.01e-12	0.370088
Basal Cell	hypoTH	ENSDARG00000056938	kera	keratocan	3.03e-12	1.48846
Basal Cell	hypoTH	ENSDARG00000074121	dnmbp	dynamin binding protein	3.05e-12	0.327301
Basal Cell	hypoTH	ENSDARG00000005356	tyro3	TYRO3 protein tyrosine kinase	3.68e-12	0.637335	Receptor
Basal Cell	hypoTH	ENSDARG00000008292	eif2s3	eukaryotic translation initiation factor 2, subunit 3 gamma	3.98e-12	0.534866
Basal Cell	hypoTH	ENSDARG00000104409	tnk2b	tyrosine kinase, non-receptor, 2b	4.63e-12	0.606095
Basal Cell	hypoTH	ENSDARG00000110950	CU929544.1		4.97e-12	0.82596
Basal Cell	hypoTH	ENSDARG00000014690	rps4x	ribosomal protein S4 X-linked	5.39e-12	0.310129
Basal Cell	hypoTH	ENSDARG00000021309	rhoca	ras homolog family member Ca	6.27e-12	0.363116
Basal Cell	hypoTH	ENSDARG00000076118	cdip1	cell death-inducing p53 target 1	6.94e-12	0.713509	TF	zf-LITAF-like
Basal Cell	hypoTH	ENSDARG00000016573	mroh1	maestro heat-like repeat family member 1	7.41e-12	0.38246
Basal Cell	hypoTH	ENSDARG00000059424	rnf215	ring finger protein 215	7.41e-12	1.90242
Basal Cell	hypoTH	ENSDARG00000055996	rps8a	ribosomal protein S8a	8.5e-12	0.342196
Basal Cell	hypoTH	ENSDARG00000069175	vps4b	vacuolar protein sorting 4 homolog B	8.92e-12	0.608756
Basal Cell	hypoTH	ENSDARG00000017365	slc23a2	solute carrier family 23 member 2	9.38e-12	0.54845
Basal Cell	hypoTH	ENSDARG00000052361	il15	interleukin 15	9.75e-12	0.592364
Basal Cell	hypoTH	ENSDARG00000075375	zgc:171501	zgc:171501	1.01e-11	0.933889
Basal Cell	hypoTH	ENSDARG00000015016	kif26ab	kinesin family member 26Ab	1.04e-11	0.452913
Basal Cell	hypoTH	ENSDARG00000070083	atp5f1b	ATP synthase F1 subunit beta	1.04e-11	0.518202
Basal Cell	hypoTH	ENSDARG00000104181	tmsb1	thymosin beta 1	1.16e-11	0.235717
Basal Cell	hypoTH	ENSDARG00000074245	spen	spen family transcriptional repressor	1.18e-11	0.446226	TF-cofactor	Others
Basal Cell	hypoTH	ENSDARG00000021556	ubl3b	ubiquitin-like 3b	1.29e-11	0.599644
Basal Cell	hypoTH	ENSDARG00000099315	nsdhl	NAD(P) dependent steroid dehydrogenase-like	1.37e-11	1.35699
Basal Cell	hypoTH	ENSDARG00000042980	cyp2p7	cytochrome P450, family 2, subfamily P, polypeptide 7	1.44e-11	0.77189
Basal Cell	hypoTH	ENSDARG00000019815	fn1a	fibronectin 1a	1.45e-11	0.342027	Ligand
Basal Cell	hypoTH	ENSDARG00000020136	ptges	prostaglandin E synthase	1.58e-11	0.61986
Basal Cell	hypoTH	ENSDARG00000008184	mia3	MIA SH3 domain ER export factor 3	1.63e-11	0.3126
Basal Cell	hypoTH	ENSDARG00000076820	xkr8.2	XK, Kell blood group complex subunit-related family, member 8, tandem duplicate 2	1.67e-11	1.33155
Basal Cell	hypoTH	ENSDARG00000055190	slc17a5	solute carrier family 17 member 5	1.9e-11	1.11814
Basal Cell	hypoTH	ENSDARG00000077572	si:ch211-193k19.2	si:ch211-193k19.2	1.95e-11	2.83317
Basal Cell	hypoTH	ENSDARG00000062577	arhgap35a	Rho GTPase activating protein 35a	2.04e-11	0.192876	TF-cofactor	Others
Basal Cell	hypoTH	ENSDARG00000103658	hivep1	human immunodeficiency virus type I enhancer binding protein 1	2.07e-11	0.267089	TF	zf-C2H2
Basal Cell	hypoTH	ENSDARG00000012914	arhgef4	Rho guanine nucleotide exchange factor (GEF) 4	2.14e-11	0.109544
Basal Cell	hypoTH	ENSDARG00000000019	ube2h	ubiquitin-conjugating enzyme E2H (UBC8 homolog, yeast)	2.25e-11	0.353486
Basal Cell	hypoTH	ENSDARG00000043821	klf7b	Kruppel-like factor 7b	2.25e-11	0.471469	TF	zf-C2H2
Basal Cell	hypoTH	ENSDARG00000035327	ckma	creatine kinase, muscle a	2.44e-11	0.730455
Basal Cell	hypoTH	ENSDARG00000045979	zgc:153704	zgc:153704	2.47e-11	2.8988
Basal Cell	hypoTH	ENSDARG00000038068	ddx5	DEAD (Asp-Glu-Ala-Asp) box helicase 5	2.7e-11	0.326958	TF-cofactor	RNA helicase
Basal Cell	hypoTH	ENSDARG00000100887	si:dkey-11f4.20	si:dkey-11f4.20	2.74e-11	1.52449
Basal Cell	hypoTH	ENSDARG00000068030	si:cabz01007802.1	si:cabz01007802.1	2.91e-11	0.347295
Basal Cell	hypoTH	ENSDARG00000058325	casp8	caspase 8, apoptosis-related cysteine peptidase	3.03e-11	0.8871
Basal Cell	hypoTH	ENSDARG00000099424	lcat	lecithin-cholesterol acyltransferase	3.05e-11	2.00751
Basal Cell	hypoTH	ENSDARG00000007377	odc1	ornithine decarboxylase 1	3.07e-11	0.382238
Basal Cell	hypoTH	ENSDARG00000059846	epg5	ectopic P-granules autophagy protein 5 homolog (C. elegans)	3.23e-11	0.558717
Basal Cell	hypoTH	ENSDARG00000077084	col28a1a	collagen, type XXVIII, alpha 1a	3.31e-11	4.23088
Basal Cell	hypoTH	ENSDARG00000078865	cxxc5a	CXXC finger protein 5a	3.33e-11	0.527904	TF-cofactor	Others
Basal Cell	hypoTH	ENSDARG00000057419	slc44a5b	solute carrier family 44 member 5b	3.4e-11	0.669889	Receptor
Basal Cell	hypoTH	ENSDARG00000074017	usp31	ubiquitin specific peptidase 31	3.44e-11	0.472668
Basal Cell	hypoTH	ENSDARG00000035622	xbp1	X-box binding protein 1	3.84e-11	0.483394	TF	TF_bZIP
Basal Cell	hypoTH	ENSDARG00000016494	ddc	dopa decarboxylase	4.17e-11	1.30044
Basal Cell	hypoTH	ENSDARG00000033609	map1lc3a	microtubule-associated protein 1 light chain 3 alpha	4.47e-11	1.01053
Basal Cell	hypoTH	ENSDARG00000005172	dynll2b	dynein, light chain, LC8-type 2b	4.94e-11	0.757069
Basal Cell	hypoTH	ENSDARG00000013307	rpl19	ribosomal protein L19	5.8e-11	0.329225
Basal Cell	hypoTH	ENSDARG00000054300	dhrs1	dehydrogenase/reductase (SDR family) member 1	6.76e-11	1.05878
Basal Cell	hypoTH	ENSDARG00000101210	glg1b	golgi glycoprotein 1b	6.97e-11	0.779862
Basal Cell	hypoTH	ENSDARG00000040237	mef2d	myocyte enhancer factor 2d	7.01e-11	0.219368	TF	SRF
Basal Cell	hypoTH	ENSDARG00000062837	spata13	spermatogenesis associated 13	7.3e-11	0.700283
Basal Cell	hypoTH	ENSDARG00000102056	svild	supervillin d	7.3e-11	0.17029
Basal Cell	hypoTH	ENSDARG00000014287	eno2	enolase 2	7.84e-11	1.0404
Basal Cell	hypoTH	ENSDARG00000079497	tcima	transcriptional and immune response regulator a	9.07e-11	1.19202
Basal Cell	hypoTH	ENSDARG00000051939	pcxb	pyruvate carboxylase b	9.52e-11	1.23337
Basal Cell	hypoTH	ENSDARG00000042410	rab40b	RAB40B, member RAS oncogene family	9.61e-11	0.709752
Basal Cell	hypoTH	ENSDARG00000007795	cst3	cystatin C (amyloid angiopathy and cerebral hemorrhage)	9.99e-11	0.346077
Basal Cell	hypoTH	ENSDARG00000026629	gmds	GDP-mannose 4,6-dehydratase	1.01e-10	0.43497
Basal Cell	hypoTH	ENSDARG00000098989	CU459012.1		1.01e-10	0.881036
Basal Cell	hypoTH	ENSDARG00000004539	ptgs2a	prostaglandin-endoperoxide synthase 2a	1.03e-10	0.434739	Ligand
Basal Cell	hypoTH	ENSDARG00000104223	lmbrd1	LMBR1 domain containing 1	1.07e-10	0.311697
Basal Cell	hypoTH	ENSDARG00000070455	tmem245	transmembrane protein 245	1.07e-10	0.524743
Basal Cell	hypoTH	ENSDARG00000016687	acadvl	acyl-CoA dehydrogenase very long chain	1.11e-10	0.46441
Basal Cell	hypoTH	ENSDARG00000020625	jak1	Janus kinase 1	1.23e-10	0.269619
Basal Cell	hypoTH	ENSDARG00000026070	cd82b	CD82 molecule b	1.36e-10	0.274728	Receptor
Basal Cell	hypoTH	ENSDARG00000088440	ssh2a	slingshot protein phosphatase 2a	1.5e-10	0.501834
Basal Cell	hypoTH	ENSDARG00000100886	si:dkeyp-97a10.1	si:dkeyp-97a10.1	1.55e-10	1.43834
Basal Cell	hypoTH	ENSDARG00000058358	krt8	keratin 8	1.68e-10	0.414841
Basal Cell	hypoTH	ENSDARG00000099260	PITPNC1		1.72e-10	1.79473
Basal Cell	hypoTH	ENSDARG00000014704	pgm2l1	phosphoglucomutase 2-like 1	1.78e-10	0.777763
Basal Cell	hypoTH	ENSDARG00000073732	myh14	myosin, heavy chain 14, non-muscle	1.82e-10	0.484184
Basal Cell	hypoTH	ENSDARG00000016868	rhobtb4	Rho related BTB domain containing 4	1.85e-10	0.487087
Basal Cell	hypoTH	ENSDARG00000044808	slc4a4b	solute carrier family 4 member 4b	1.87e-10	0.793819
Basal Cell	hypoTH	ENSDARG00000032405	ckap4	cytoskeleton associated protein 4	1.94e-10	0.725394
Basal Cell	hypoTH	ENSDARG00000012458	zgc:77849	zgc:77849	2.08e-10	0.488437
Basal Cell	hypoTH	ENSDARG00000044328	ankrd46a	ankyrin repeat domain 46a	2.32e-10	0.902251
Basal Cell	hypoTH	ENSDARG00000013685	vsig8b	V-set and immunoglobulin domain containing 8b	2.37e-10	0.848356
Basal Cell	hypoTH	ENSDARG00000080015	lrrtm4l1	leucine rich repeat transmembrane neuronal 4 like 1	3.07e-10	1.17357
Basal Cell	hypoTH	ENSDARG00000075383	gramd1ba	GRAM domain containing 1Ba	3.3e-10	0.704316
Basal Cell	hypoTH	ENSDARG00000022165	mgst1.2	microsomal glutathione S-transferase 1.2	3.65e-10	0.75204
Basal Cell	hypoTH	ENSDARG00000055837	arhgef1b	Rho guanine nucleotide exchange factor (GEF) 1b	3.8e-10	0.259819
Basal Cell	hypoTH	ENSDARG00000102025	znf644b	zinc finger protein 644b	4.59e-10	0.524984	TF	zf-C2H2
Basal Cell	hypoTH	ENSDARG00000017155	wnt10a	wingless-type MMTV integration site family, member 10a	5.11e-10	0.499431
Basal Cell	hypoTH	ENSDARG00000077215	eif4g3a	eukaryotic translation initiation factor 4 gamma, 3a	5.63e-10	0.34334
Basal Cell	hypoTH	ENSDARG00000010149	atp5fa1	ATP synthase F1 subunit alpha	5.72e-10	0.424416
Basal Cell	hypoTH	ENSDARG00000069888	cldna	claudin a	5.86e-10	0.831391
Basal Cell	hypoTH	ENSDARG00000110963	trib1	tribbles pseudokinase 1	6.12e-10	0.592031	TF-cofactor	Others
Basal Cell	hypoTH	ENSDARG00000044362	unc119b	unc-119 homolog b (C. elegans)	6.14e-10	0.722682
Basal Cell	hypoTH	ENSDARG00000090767	si:ch211-136m16.8	si:ch211-136m16.8	7.18e-10	0.66018
Basal Cell	hypoTH	ENSDARG00000003127	zgc:123105	zgc:123105	7.5e-10	0.680984
Basal Cell	hypoTH	ENSDARG00000017014	ywhae2	tyrosine 3-monooxygenase/tryptophan 5-monooxygenase activation protein, epsilon polypeptide 2	9.2e-10	0.426476
Basal Cell	hypoTH	ENSDARG00000017687	dnajc5gb	DnaJ (Hsp40) homolog, subfamily C, member 5 gamma b	9.62e-10	0.587418
Basal Cell	hypoTH	ENSDARG00000077297	nbr1a	NBR1 autophagy cargo receptor a	1.06e-09	0.627164
Basal Cell	hypoTH	ENSDARG00000023963	tpm4a	tropomyosin 4a	1.17e-09	0.661089
Basal Cell	hypoTH	ENSDARG00000088717	ecrg4b	ECRG4 augurin precursor b	1.19e-09	2.2203
Basal Cell	hypoTH	ENSDARG00000060600	capn15	calpain 15	1.46e-09	0.559844	TF	Others
Basal Cell	hypoTH	ENSDARG00000099175	hmgb1a	high mobility group box 1a	1.48e-09	0.590296	TF	HMG
Basal Cell	hypoTH	ENSDARG00000022689	itgb1b.2	integrin, beta 1b.2	1.56e-09	0.761405	Receptor
Basal Cell	hypoTH	ENSDARG00000035692	rps3a	ribosomal protein S3A	1.58e-09	0.341893
Basal Cell	hypoTH	ENSDARG00000019778	rps6	ribosomal protein S6	1.65e-09	0.320387
Basal Cell	hypoTH	ENSDARG00000055255	pitpnm3	PITPNM family member 3	1.79e-09	0.198911
Basal Cell	hypoTH	ENSDARG00000005163	efr3a	EFR3 homolog A (S. cerevisiae)	1.86e-09	0.31803
Basal Cell	hypoTH	ENSDARG00000009702	ascl1b	achaete-scute family bHLH transcription factor 1b	2.07e-09	1.02377
Basal Cell	hypoTH	ENSDARG00000004055	uhrf1bp1l	UHRF1 binding protein 1-like	2.17e-09	0.473386
Basal Cell	hypoTH	ENSDARG00000043802	ms4a17a.8	membrane-spanning 4-domains, subfamily A, member 17A.8	2.38e-09	1.07963
Basal Cell	hypoTH	ENSDARG00000041619	rack1	receptor for activated C kinase 1	2.5e-09	0.304107
Basal Cell	hypoTH	ENSDARG00000029146	lrp1ab	low density lipoprotein receptor-related protein 1Ab	2.56e-09	0.2637	Receptor
Basal Cell	hypoTH	ENSDARG00000013681	si:dkey-42i9.6	si:dkey-42i9.6	2.57e-09	0.446433
Basal Cell	hypoTH	ENSDARG00000104760	si:ch211-1i11.3	si:ch211-1i11.3	2.76e-09	0.352054
Basal Cell	hypoTH	ENSDARG00000019360	sec23b	SEC23 homolog B, coat complex II component	2.96e-09	0.517569
Basal Cell	hypoTH	ENSDARG00000002013	grb10a	growth factor receptor-bound protein 10a	2.99e-09	0.337995
Basal Cell	hypoTH	ENSDARG00000037363	st5	suppression of tumorigenicity 5	3.04e-09	0.250566
Basal Cell	hypoTH	ENSDARG00000071626	ptgdsb.2	prostaglandin D2 synthase b, tandem duplicate 2	3.18e-09	0.301004
Basal Cell	hypoTH	ENSDARG00000077419	nectin4a	nectin cell adhesion molecule 4a	3.34e-09	0.629551	Receptor
Basal Cell	hypoTH	ENSDARG00000098955	ssh2b	slingshot protein phosphatase 2b	3.34e-09	0.306743
Basal Cell	hypoTH	ENSDARG00000013500	abca2	ATP-binding cassette, sub-family A (ABC1), member 2	3.65e-09	0.547534
Basal Cell	hypoTH	ENSDARG00000036993	erbb3b	erb-b2 receptor tyrosine kinase 3b	3.79e-09	0.536699	Receptor
Basal Cell	hypoTH	ENSDARG00000041951	selenoo1	selenoprotein O1	4.6e-09	0.825222
Basal Cell	hypoTH	ENSDARG00000055731	si:dkeyp-69e1.8	si:dkeyp-69e1.8	4.78e-09	0.875583
Basal Cell	hypoTH	ENSDARG00000101188	CABZ01048053.1		5.87e-09	0.619997
Basal Cell	hypoTH	ENSDARG00000077540	f2rl1.2	coagulation factor II (thrombin) receptor-like 1, tandem duplicate 2	5.92e-09	1.2685	Receptor
Basal Cell	hypoTH	ENSDARG00000019881	bsg	basigin	6.27e-09	0.35535
Basal Cell	hypoTH	ENSDARG00000021806	zfp36l2	zinc finger protein 36, C3H type-like 2	6.27e-09	0.595641
Basal Cell	hypoTH	ENSDARG00000044153	ppp1cb	protein phosphatase 1, catalytic subunit, beta isozyme	6.32e-09	0.593216
Basal Cell	hypoTH	ENSDARG00000004757	ybx1	Y box binding protein 1	6.84e-09	0.261574	TF	CSD
Basal Cell	hypoTH	ENSDARG00000008767	tle2b	TLE family member 2, transcriptional corepressor b	6.86e-09	0.445247
Basal Cell	hypoTH	ENSDARG00000057016	cdc14ab	cell division cycle 14Ab	7.36e-09	0.372221
Basal Cell	hypoTH	ENSDARG00000056680	stc2a	stanniocalcin 2a	7.95e-09	1.25673
Basal Cell	hypoTH	ENSDARG00000063905	mt-co1	cytochrome c oxidase I, mitochondrial	7.96e-09	0.196826
Basal Cell	hypoTH	ENSDARG00000030914	tmem120a	transmembrane protein 120A	8.1e-09	0.682889
Basal Cell	hypoTH	ENSDARG00000079939	jmjd1cb	jumonji domain containing 1Cb	8.14e-09	0.112666	TF-cofactor	Other_CRF
Basal Cell	hypoTH	ENSDARG00000042825	rnf169	ring finger protein 169	8.45e-09	0.640705
Basal Cell	hypoTH	ENSDARG00000102612	slc15a4	solute carrier family 15 member 4	8.53e-09	0.362625
Basal Cell	hypoTH	ENSDARG00000020876	pdk2a	pyruvate dehydrogenase kinase, isozyme 2a	8.6e-09	0.434784
Basal Cell	hypoTH	ENSDARG00000101507	ATG2A		9.02e-09	0.376708
Basal Cell	hypoTH	ENSDARG00000010294	fmodb	fibromodulin b	9.09e-09	0.907375
Basal Cell	hypoTH	ENSDARG00000097032	si:ch211-256a21.4	si:ch211-256a21.4	9.11e-09	1.27694
Basal Cell	hypoTH	ENSDARG00000029439	atp2a2a	ATPase sarcoplasmic/endoplasmic reticulum Ca2+ transporting 2a	9.45e-09	0.355983
Basal Cell	hypoTH	ENSDARG00000074075	antxr1b	ANTXR cell adhesion molecule 1b	9.66e-09	1.02164
Basal Cell	hypoTH	ENSDARG00000086805	itprid1	ITPR interacting domain containing 1	9.71e-09	0.442534
Basal Cell	hypoTH	ENSDARG00000017338	kidins220b	kinase D-interacting substrate 220b	9.85e-09	0.422327	Receptor
Basal Cell	hypoTH	ENSDARG00000117130	BX936439.1		9.93e-09	0.801475
Basal Cell	hypoTH	ENSDARG00000078964	esyt2b	extended synaptotagmin-like protein 2b	1.02e-08	0.800175
Basal Cell	hypoTH	ENSDARG00000007682	ppdpfa	pancreatic progenitor cell differentiation and proliferation factor a	1.08e-08	1.87681
Basal Cell	hypoTH	ENSDARG00000009014	col11a1b	collagen, type XI, alpha 1b	1.1e-08	0.514551	Ligand
Basal Cell	hypoTH	ENSDARG00000062634	kat2b	K(lysine) acetyltransferase 2B	1.12e-08	0.569415	TF-cofactor	Lysine acetyltransferase
Basal Cell	hypoTH	ENSDARG00000051915	pde5ab	phosphodiesterase 5A, cGMP-specific, b	1.15e-08	1.41742
Basal Cell	hypoTH	ENSDARG00000089221	si:ch211-195o20.7	si:ch211-195o20.7	1.18e-08	0.675615
Basal Cell	hypoTH	ENSDARG00000094428	si:dkey-31f5.8	si:dkey-31f5.8	1.24e-08	1.0756
Basal Cell	hypoTH	ENSDARG00000031848	pparg	peroxisome proliferator-activated receptor gamma	1.34e-08	0.62933
Basal Cell	hypoTH	ENSDARG00000115264	BX649300.2		1.38e-08	0.788059
Basal Cell	hypoTH	ENSDARG00000102556	nfat5b	nuclear factor of activated T cells 5b	1.39e-08	0.781624	TF	RHD
Basal Cell	hypoTH	ENSDARG00000020574	atp2a1	ATPase sarcoplasmic/endoplasmic reticulum Ca2+ transporting 1	1.45e-08	0.825978
Basal Cell	hypoTH	ENSDARG00000060977	zgc:153018	zgc:153018	1.48e-08	0.693497
Basal Cell	hypoTH	ENSDARG00000075903	chadlb	chondroadherin-like b	1.49e-08	2.03958
Basal Cell	hypoTH	ENSDARG00000005927	tbc1d17	TBC1 domain family, member 17	1.56e-08	0.746629
Basal Cell	hypoTH	ENSDARG00000053563	ms4a17a.12	membrane-spanning 4-domains, subfamily A, member 17A.12	1.6e-08	0.876215
Basal Cell	hypoTH	ENSDARG00000029587	msra	methionine sulfoxide reductase A	1.66e-08	0.265526
Basal Cell	hypoTH	ENSDARG00000087289	zgc:66473	zgc:66473	1.75e-08	1.53477
Basal Cell	hypoTH	ENSDARG00000035127	rxrab	retinoid x receptor, alpha b	1.8e-08	0.436939	TF	RXR-like
Basal Cell	hypoTH	ENSDARG00000077650	tnksa	tankyrase, TRF1-interacting ankyrin-related ADP-ribose polymerase a	1.8e-08	0.211225
Basal Cell	hypoTH	ENSDARG00000017441	mylz3	myosin, light polypeptide 3, skeletal muscle	1.94e-08	0.442751
Basal Cell	hypoTH	ENSDARG00000012972	cfl1l	cofilin 1 (non-muscle), like	1.97e-08	0.225911
Basal Cell	hypoTH	ENSDARG00000054122	tmem30b	transmembrane protein 30B	2.02e-08	0.677241
Basal Cell	hypoTH	ENSDARG00000059006	otud5a	OTU deubiquitinase 5a	2.04e-08	0.409695
Basal Cell	hypoTH	ENSDARG00000032197	klf12b	Kruppel-like factor 12b	2.18e-08	0.63415	TF	zf-C2H2
Basal Cell	hypoTH	ENSDARG00000007320	rpl7	ribosomal protein L7	2.21e-08	0.314299
Basal Cell	hypoTH	ENSDARG00000014181	foxp1b	forkhead box P1b	2.37e-08	0.24352	TF	Fork_head
Basal Cell	hypoTH	ENSDARG00000041723	TUBB4B		2.44e-08	2.13604
Basal Cell	hypoTH	ENSDARG00000016396	fam219aa	family with sequence similarity 219 member Aa	2.63e-08	0.705541
Basal Cell	hypoTH	ENSDARG00000058451	rpl6	ribosomal protein L6	2.71e-08	0.281663
Basal Cell	hypoTH	ENSDARG00000095451	si:ch211-196l7.4	si:ch211-196l7.4	2.78e-08	0.277533
Basal Cell	hypoTH	ENSDARG00000080009	bahcc1b	BAH domain and coiled-coil containing 1b	3.09e-08	0.252236
Basal Cell	hypoTH	ENSDARG00000051956	isca1	iron-sulfur cluster assembly 1	3.11e-08	0.804487
Basal Cell	hypoTH	ENSDARG00000023797	ryr1b	ryanodine receptor 1b (skeletal)	3.23e-08	0.651424
Basal Cell	hypoTH	ENSDARG00000054833	nucb1	nucleobindin 1	3.3e-08	0.595268
Basal Cell	hypoTH	ENSDARG00000079128	becn1	beclin 1, autophagy related	3.3e-08	0.232597
Basal Cell	hypoTH	ENSDARG00000069135	ppp1r15a	protein phosphatase 1, regulatory subunit 15A	3.51e-08	0.985038
Basal Cell	hypoTH	ENSDARG00000104674	cct2	chaperonin containing TCP1, subunit 2 (beta)	3.85e-08	0.58537
Basal Cell	hypoTH	ENSDARG00000069378	pard6a	par-6 family cell polarity regulator alpha	4.04e-08	0.381146
Basal Cell	hypoTH	ENSDARG00000004396	b3gnt5b	UDP-GlcNAc:betaGal beta-1,3-N-acetylglucosaminyltransferase 5b	4.38e-08	0.687449
Basal Cell	hypoTH	ENSDARG00000087032	rbbp8l	retinoblastoma binding protein 8-like	4.56e-08	0.592829
Basal Cell	hypoTH	ENSDARG00000076799	rnd3a	Rho family GTPase 3a	4.62e-08	0.347818
Basal Cell	hypoTH	ENSDARG00000089917	sh3tc2	SH3 domain and tetratricopeptide repeats 2	5.14e-08	0.830403
Basal Cell	hypoTH	ENSDARG00000012405	col1a1a	collagen, type I, alpha 1a	6.36e-08	0.14339	Ligand
Basal Cell	hypoTH	ENSDARG00000087306	CABZ01038521.1		6.36e-08	1.06614
Basal Cell	hypoTH	ENSDARG00000035835	eef2k	eukaryotic elongation factor 2 kinase	6.62e-08	0.460536
Basal Cell	hypoTH	ENSDARG00000021975	ginm1	glycoprotein integral membrane 1	6.93e-08	0.637409
Basal Cell	hypoTH	ENSDARG00000052654	thrab	thyroid hormone receptor alpha b	7.09e-08	0.129296	TF	THR-like
Basal Cell	hypoTH	ENSDARG00000020600	rnf144aa	ring finger protein 144aa	7.7e-08	0.229904
Basal Cell	hypoTH	ENSDARG00000062330	si:ch211-233a24.2	si:ch211-233a24.2	7.88e-08	0.183385
Basal Cell	hypoTH	ENSDARG00000001933	prkag2b	protein kinase, AMP-activated, gamma 2 non-catalytic subunit b	8.12e-08	0.337873
Basal Cell	hypoTH	ENSDARG00000018619	cers4b	ceramide synthase 4b	8.12e-08	1.54191
Basal Cell	hypoTH	ENSDARG00000074311	mast2	microtubule associated serine/threonine kinase 2	8.55e-08	0.276842
Basal Cell	hypoTH	ENSDARG00000015563	zgc:123305	zgc:123305	8.65e-08	0.734483
Basal Cell	hypoTH	ENSDARG00000058696	tbl1xr1a	transducin (beta)-like 1 X-linked receptor 1a	8.77e-08	0.166816	TF-cofactor	Transducin
Basal Cell	hypoTH	ENSDARG00000021343	wsb1	WD repeat and SOCS box containing 1	9.02e-08	0.341308
Basal Cell	hypoTH	ENSDARG00000003695	vdac3	voltage-dependent anion channel 3	9.26e-08	0.829414
Basal Cell	hypoTH	ENSDARG00000061635	myo5aa	myosin VAa	9.49e-08	0.449982
Basal Cell	hypoTH	ENSDARG00000040295	apoeb	apolipoprotein Eb	9.81e-08	0.29806	Ligand
Basal Cell	hypoTH	ENSDARG00000103007	rps3	ribosomal protein S3	1.02e-07	0.251975
Basal Cell	hypoTH	ENSDARG00000035471	si:dkey-220k22.1	si:dkey-220k22.1	1.11e-07	0.1873
Basal Cell	hypoTH	ENSDARG00000002710	ncl	nucleolin	1.13e-07	0.410399
Basal Cell	hypoTH	ENSDARG00000020008	vcp	valosin containing protein	1.2e-07	0.451856
Basal Cell	hypoTH	ENSDARG00000007323	chmp4bb	charged multivesicular body protein 4Bb	1.24e-07	0.545577
Basal Cell	hypoTH	ENSDARG00000077785	atf5b	activating transcription factor 5b	1.28e-07	0.640832	TF	TF_bZIP
Basal Cell	hypoTH	ENSDARG00000068580	glis1a	GLIS family zinc finger 1a	1.29e-07	1.66772	TF	zf-C2H2
Basal Cell	hypoTH	ENSDARG00000033683	tpma	alpha-tropomyosin	1.36e-07	0.684998
Basal Cell	hypoTH	ENSDARG00000078404	cdh26.1	cadherin 26, tandem duplicate 1	1.38e-07	0.352316
Basal Cell	hypoTH	ENSDARG00000102571	metap2b	methionyl aminopeptidase 2b	1.55e-07	0.484758
Basal Cell	hypoTH	ENSDARG00000010956	sh3glb1b	SH3-domain GRB2-like endophilin B1b	1.69e-07	0.454014
Basal Cell	hypoTH	ENSDARG00000042877	heca	hdc homolog, cell cycle regulator	1.77e-07	0.666204
Basal Cell	hypoTH	ENSDARG00000044093	rpl13a	ribosomal protein L13a	1.79e-07	0.334048
Basal Cell	hypoTH	ENSDARG00000061723	tmem64	transmembrane protein 64	1.91e-07	0.864794
Basal Cell	hypoTH	ENSDARG00000088307	mrtfba	myocardin related transcription factor Ba	1.96e-07	0.378461
Basal Cell	hypoTH	ENSDARG00000104225	ndel1b	nudE neurodevelopment protein 1-like 1b	2.06e-07	0.796091
Basal Cell	hypoTH	ENSDARG00000003281	pik3ip1	phosphoinositide-3-kinase interacting protein 1	2.2e-07	0.671728
Basal Cell	hypoTH	ENSDARG00000040284	si:dkey-79d12.5	si:dkey-79d12.5	2.2e-07	1.01869
Basal Cell	hypoTH	ENSDARG00000043736	si:ch211-282j17.8	si:ch211-282j17.8	2.37e-07	1.01868
Basal Cell	hypoTH	ENSDARG00000014050	ngfb	nerve growth factor b (beta polypeptide)	2.44e-07	1.07347	Ligand
Basal Cell	hypoTH	ENSDARG00000027345	mpzl2b	myelin protein zero-like 2b	2.44e-07	0.395635
Basal Cell	hypoTH	ENSDARG00000074223	MDFIC		2.47e-07	0.453494
Basal Cell	hypoTH	ENSDARG00000040445	si:ch211-219a4.3	si:ch211-219a4.3	2.75e-07	0.855503	TF-cofactor	PARP
Basal Cell	hypoTH	ENSDARG00000004405	snx10a	sorting nexin 10a	2.78e-07	0.914926
Basal Cell	hypoTH	ENSDARG00000099694	neurl1b	neuralized E3 ubiquitin protein ligase 1B	2.78e-07	0.932173
Basal Cell	hypoTH	ENSDARG00000115094	CABZ01087415.1		2.85e-07	1.02655
Basal Cell	hypoTH	ENSDARG00000058943	cdcp1a	CUB domain containing protein 1a	2.93e-07	0.869615
Basal Cell	hypoTH	ENSDARG00000060922	ess2	ess-2 splicing factor homolog	2.95e-07	0.9285
Basal Cell	hypoTH	ENSDARG00000100072	mgrn1a	mahogunin, ring finger 1a	2.97e-07	0.469308	Receptor
Basal Cell	hypoTH	ENSDARG00000099624	chmp1b	chromatin modifying protein 1B	3.02e-07	0.661615
Basal Cell	hypoTH	ENSDARG00000101115	med30	mediator complex subunit 30	3.09e-07	0.857274	TF-cofactor	Mediator complex
Basal Cell	hypoTH	ENSDARG00000104702	cat	catalase	3.21e-07	1.10008
Basal Cell	hypoTH	ENSDARG00000039351	ccl19b	chemokine (C-C motif) ligand 19b	3.27e-07	0.817694
Basal Cell	hypoTH	ENSDARG00000007108	lipia	lipase, member Ia	3.38e-07	0.597013
Basal Cell	hypoTH	ENSDARG00000042539	ywhaqa	tyrosine 3-monooxygenase/tryptophan 5-monooxygenase activation protein, theta polypeptide a	3.39e-07	0.52235
Basal Cell	hypoTH	ENSDARG00000104103	rps6kc1	ribosomal protein S6 kinase polypeptide 1	3.65e-07	0.689192
Basal Cell	hypoTH	ENSDARG00000045277	rdh12l	retinol dehydrogenase 12, like	3.68e-07	0.83556
Basal Cell	hypoTH	ENSDARG00000075435	akap11	A kinase (PRKA) anchor protein 11	3.99e-07	0.465296
Basal Cell	hypoTH	ENSDARG00000068187	spg7	SPG7 matrix AAA peptidase subunit, paraplegin	4.08e-07	0.583926
Basal Cell	hypoTH	ENSDARG00000013711	zgc:77486	zgc:77486	4.28e-07	0.523167
Basal Cell	hypoTH	ENSDARG00000029381	aldh3a2b	aldehyde dehydrogenase 3 family, member A2b	4.28e-07	0.70223
Basal Cell	hypoTH	ENSDARG00000103600	st8sia4	ST8 alpha-N-acetyl-neuraminide alpha-2,8-sialyltransferase 4	4.49e-07	0.568584
Basal Cell	hypoTH	ENSDARG00000004018	CHST13		4.52e-07	0.40316
Basal Cell	hypoTH	ENSDARG00000102415	scinla	scinderin like a	4.6e-07	0.681643
Basal Cell	hypoTH	ENSDARG00000044895	fmoda	fibromodulin a	4.66e-07	2.04404
Basal Cell	hypoTH	ENSDARG00000053087	mthfr	methylenetetrahydrofolate reductase (NAD(P)H)	4.89e-07	0.721254
Basal Cell	hypoTH	ENSDARG00000101405	CABZ01084230.1		4.91e-07	1.27135
Basal Cell	hypoTH	ENSDARG00000023724	cdc42se1	CDC42 small effector 1	5.34e-07	0.240891
Basal Cell	hypoTH	ENSDARG00000086184	FBXO48		5.4e-07	1.11535
Basal Cell	hypoTH	ENSDARG00000099389	cdo1	cysteine dioxygenase, type I	5.42e-07	0.734856
Basal Cell	hypoTH	ENSDARG00000025581	rpl10	ribosomal protein L10	5.74e-07	0.295047
Basal Cell	hypoTH	ENSDARG00000096310	wu:fj64h06	wu:fj64h06	6.24e-07	0.796891
Basal Cell	hypoTH	ENSDARG00000008757	entpd6	ectonucleoside triphosphate diphosphohydrolase 6	6.27e-07	0.640818
Basal Cell	hypoTH	ENSDARG00000012040	rnf19a	ring finger protein 19A, RBR E3 ubiquitin protein ligase	6.31e-07	0.275967
Basal Cell	hypoTH	ENSDARG00000056600	papss2b	3'-phosphoadenosine 5'-phosphosulfate synthase 2b	6.46e-07	0.444334
Basal Cell	hypoTH	ENSDARG00000039007	eno3	enolase 3, (beta, muscle)	6.63e-07	0.616251
Basal Cell	hypoTH	ENSDARG00000024209	wasf2	WASP family member 2	7.31e-07	0.388677
Basal Cell	hypoTH	ENSDARG00000035913	yars	tyrosyl-tRNA synthetase	7.31e-07	0.973589	Ligand
Basal Cell	hypoTH	ENSDARG00000070571	inavab	innate immunity activator b	7.48e-07	0.273347
Basal Cell	hypoTH	ENSDARG00000033999	cyp26a1	cytochrome P450, family 26, subfamily A, polypeptide 1	7.93e-07	1.32046
Basal Cell	hypoTH	ENSDARG00000036445	serpinh2	serine (or cysteine) peptidase inhibitor, clade H, member 2	8.18e-07	0.454655
Basal Cell	hypoTH	ENSDARG00000074507	rmdn1	regulator of microtubule dynamics 1	8.35e-07	0.692603
Basal Cell	hypoTH	ENSDARG00000018411	mknk1	MAPK interacting serine/threonine kinase 1	8.71e-07	0.811061
Basal Cell	hypoTH	ENSDARG00000009950	edf1	endothelial differentiation-related factor 1	8.86e-07	0.640036	TF-cofactor	Others
Basal Cell	hypoTH	ENSDARG00000055510	ypel3	yippee-like 3	8.9e-07	1.07194
Basal Cell	hypoTH	ENSDARG00000012407	mgat1a	mannosyl (alpha-1,3-)-glycoprotein beta-1,2-N-acetylglucosaminyltransferase a	9.05e-07	0.735351
Basal Cell	hypoTH	ENSDARG00000013968	psap	prosaposin	9.36e-07	0.399208
Basal Cell	hypoTH	ENSDARG00000091951	nuggc.2	nuclear GTPase, germinal center associated, tandem duplicate 2	9.39e-07	2.27888
Basal Cell	hypoTH	ENSDARG00000067796	clpxb	caseinolytic mitochondrial matrix peptidase chaperone subunit b	9.82e-07	0.504856
Basal Cell	hypoTH	ENSDARG00000010029	spon1a	spondin 1a	9.95e-07	1.14024
Basal Cell	hypoTH	ENSDARG00000056725	hmgb3a	high mobility group box 3a	1.03e-06	0.837713	TF	HMG
Basal Cell	hypoTH	ENSDARG00000014746	rbfox1	RNA binding fox-1 homolog 1	1.22e-06	0.209602	TF-cofactor	Others
Basal Cell	hypoTH	ENSDARG00000077492	atp8a2	ATPase phospholipid transporting 8A2	1.34e-06	0.422614
Basal Cell	hypoTH	ENSDARG00000079931	snx19b	sorting nexin 19b	1.34e-06	0.764382
Basal Cell	hypoTH	ENSDARG00000026294	erbb2	erb-b2 receptor tyrosine kinase 2	1.34e-06	0.322285	Receptor
Basal Cell	hypoTH	ENSDARG00000009624	CABZ01027646.1		1.39e-06	0.936346
Basal Cell	hypoTH	ENSDARG00000015199	cblb	Cbl proto-oncogene B, E3 ubiquitin protein ligase	1.39e-06	0.190801
Basal Cell	hypoTH	ENSDARG00000044718	vav2	vav 2 guanine nucleotide exchange factor	1.42e-06	0.212755
Basal Cell	hypoTH	ENSDARG00000021239	apaf1	apoptotic peptidase activating factor 1	1.45e-06	0.4623
Basal Cell	hypoTH	ENSDARG00000037284	ptges3a	prostaglandin E synthase 3a (cytosolic)	1.46e-06	0.767519
Basal Cell	hypoTH	ENSDARG00000057688	ical1	islet cell autoantigen 1-like	1.5e-06	0.723236
Basal Cell	hypoTH	ENSDARG00000059722	ubac1	UBA domain containing 1	1.51e-06	0.748101
Basal Cell	hypoTH	ENSDARG00000040087	epb41l4a	erythrocyte membrane protein band 4.1 like 4A	1.62e-06	0.747827
Basal Cell	hypoTH	ENSDARG00000068967	zgc:153372	zgc:153372	1.82e-06	0.287891
Basal Cell	hypoTH	ENSDARG00000079312	kmt2ca	lysine (K)-specific methyltransferase 2Ca	1.86e-06	0.194025
Basal Cell	hypoTH	ENSDARG00000101423	cyp2y3	cytochrome P450, family 2, subfamily Y, polypeptide 3	1.92e-06	0.69787
Basal Cell	hypoTH	ENSDARG00000052623	bsdc1	BSD domain containing 1	2.01e-06	0.52618
Basal Cell	hypoTH	ENSDARG00000061391	grhl1	grainyhead-like transcription factor 1	2.03e-06	0.583138	TF	CP2
Basal Cell	hypoTH	ENSDARG00000086100	cd302	CD302 molecule	2.03e-06	0.620079
Basal Cell	hypoTH	ENSDARG00000022187	usp6nl	USP6 N-terminal like	2.21e-06	0.298606
Basal Cell	hypoTH	ENSDARG00000041665	mkrn1	makorin, ring finger protein, 1	2.23e-06	0.565574
Basal Cell	hypoTH	ENSDARG00000025094	edem1	ER degradation enhancer, mannosidase alpha-like 1	2.25e-06	0.461146
Basal Cell	hypoTH	ENSDARG00000103732	plp1a	proteolipid protein 1a	2.31e-06	1.0304
Basal Cell	hypoTH	ENSDARG00000076066	2023-03-06	membrane-associated ring finger (C3HC4) 6	2.55e-06	0.376883
Basal Cell	hypoTH	ENSDARG00000055045	casp3b	caspase 3, apoptosis-related cysteine peptidase b	2.72e-06	1.09961
Basal Cell	hypoTH	ENSDARG00000028614	mospd1	motile sperm domain containing 1	2.92e-06	0.681788
Basal Cell	hypoTH	ENSDARG00000078904	brd4	bromodomain containing 4	2.92e-06	0.186134
Basal Cell	hypoTH	ENSDARG00000061121	adgrl3.1	adhesion G protein-coupled receptor L3.1	2.99e-06	0.459155
Basal Cell	hypoTH	ENSDARG00000039325	pmepa1	prostate transmembrane protein, androgen induced 1	3.03e-06	0.493081
Basal Cell	hypoTH	ENSDARG00000023214	mob2a	MOB kinase activator 2a	3.08e-06	0.333064
Basal Cell	hypoTH	ENSDARG00000034643	fhl3a	four and a half LIM domains 3a	3.09e-06	0.175091
Basal Cell	hypoTH	ENSDARG00000016357	fmo5	flavin containing dimethylaniline monoxygenase 5	3.13e-06	0.795567
Basal Cell	hypoTH	ENSDARG00000054666	pgpep1	pyroglutamyl-peptidase I	3.19e-06	0.42875
Basal Cell	hypoTH	ENSDARG00000060257	zranb1a	zinc finger, RAN-binding domain containing 1a	3.33e-06	0.744815
Basal Cell	hypoTH	ENSDARG00000038834	etfdh	electron transfer flavoprotein dehydrogenase	3.55e-06	0.666157
Basal Cell	hypoTH	ENSDARG00000014531	atg4a	autophagy related 4A, cysteine peptidase	3.64e-06	0.752991
Basal Cell	hypoTH	ENSDARG00000100236	cspp1a	centrosome and spindle pole associated protein 1a	3.72e-06	1.21463
Basal Cell	hypoTH	ENSDARG00000056619	arhgap42a	Rho GTPase activating protein 42a	3.79e-06	0.332021
Basal Cell	hypoTH	ENSDARG00000097264	si:ch211-40k21.5	si:ch211-40k21.5	4.04e-06	0.824051
Basal Cell	hypoTH	ENSDARG00000056101	kcnd3	potassium voltage-gated channel, Shal-related subfamily, member 3	4.09e-06	1.09111
Basal Cell	hypoTH	ENSDARG00000007671	ghrb	growth hormone receptor b	4.31e-06	0.450348	Receptor
Basal Cell	hypoTH	ENSDARG00000041381	arntl2	aryl hydrocarbon receptor nuclear translocator-like 2	4.41e-06	0.55833	TF	bHLH
Basal Cell	hypoTH	ENSDARG00000016132	keap1a	kelch-like ECH-associated protein 1a	4.43e-06	0.426778
Basal Cell	hypoTH	ENSDARG00000073948	prok1	prokineticin 1	4.5e-06	1.68092
Basal Cell	hypoTH	ENSDARG00000077404	ncoa3	nuclear receptor coactivator 3	4.65e-06	0.219214
Basal Cell	hypoTH	ENSDARG00000073810	thbs2b	thrombospondin 2b	4.68e-06	0.742131	Ligand
Basal Cell	hypoTH	ENSDARG00000074560	CHST8		4.99e-06	1.06614
Basal Cell	hypoTH	ENSDARG00000102105	dad1	defender against cell death 1	5.19e-06	0.575567
Basal Cell	hypoTH	ENSDARG00000111840	cxcl18a.1	chemokine (C-X-C motif) ligand 18a, duplicate 1	5.26e-06	1.07591
Basal Cell	hypoTH	ENSDARG00000116433	LO017877.2		5.34e-06	0.690602
Basal Cell	hypoTH	ENSDARG00000040439	rsl24d1	ribosomal L24 domain containing 1	5.39e-06	0.648186
Basal Cell	hypoTH	ENSDARG00000033251	osbpl3a	oxysterol binding protein-like 3a	5.44e-06	0.235161
Basal Cell	hypoTH	ENSDARG00000028800	CYTH2		5.46e-06	0.628175
Basal Cell	hypoTH	ENSDARG00000016154	zfp36l1a	zinc finger protein 36, C3H type-like 1a	5.49e-06	0.490461	TF	zf-CCCH
Basal Cell	hypoTH	ENSDARG00000057751	zbtb47a	zinc finger and BTB domain containing 47a	5.49e-06	0.995429	TF	ZBTB
Basal Cell	hypoTH	ENSDARG00000002949	ppp6c	protein phosphatase 6, catalytic subunit	5.53e-06	0.811405
Basal Cell	hypoTH	ENSDARG00000021833	ahr2	aryl hydrocarbon receptor 2	5.54e-06	0.166723	TF	bHLH
Basal Cell	hypoTH	ENSDARG00000007175	recql	RecQ helicase-like	6.22e-06	0.833932
Basal Cell	hypoTH	ENSDARG00000022891	zgc:175214	zgc:175214	6.44e-06	0.427358
Basal Cell	hypoTH	ENSDARG00000058606	sik1	salt-inducible kinase 1	6.51e-06	0.689826
Basal Cell	hypoTH	ENSDARG00000074776	tmem154	transmembrane protein 154	6.66e-06	0.256048
Basal Cell	hypoTH	ENSDARG00000039269	arg2	arginase 2	7.47e-06	0.584639
Basal Cell	hypoTH	ENSDARG00000103840	lrrc8db	leucine rich repeat containing 8 VRAC subunit Db	7.5e-06	0.510048
Basal Cell	hypoTH	ENSDARG00000101631	etfa	electron transfer flavoprotein subunit alpha	7.65e-06	0.352039
Basal Cell	hypoTH	ENSDARG00000030782	exoc3l2b	exocyst complex component 3-like 2b	7.91e-06	1.20662
Basal Cell	hypoTH	ENSDARG00000032618	mgst1.1	microsomal glutathione S-transferase 1.1	7.98e-06	1.14645
Basal Cell	hypoTH	ENSDARG00000103979	calr3a	calreticulin 3a	8.06e-06	0.483541	Ligand
Basal Cell	hypoTH	ENSDARG00000037618	ddit4	DNA-damage-inducible transcript 4	8.19e-06	0.607008
Basal Cell	hypoTH	ENSDARG00000090986	si:dkeyp-115e12.6	si:dkeyp-115e12.6	8.33e-06	0.33642
Basal Cell	hypoTH	ENSDARG00000030006	slc6a7	solute carrier family 6 member 7	8.41e-06	0.326455
Basal Cell	hypoTH	ENSDARG00000075123	trafd1	TRAF-type zinc finger domain containing 1	8.48e-06	0.706868
Basal Cell	hypoTH	ENSDARG00000091996	tcnbb	transcobalamin beta b	9.07e-06	1.10138
Basal Cell	hypoTH	ENSDARG00000061173	st14a	suppression of tumorigenicity 14a	9.26e-06	0.38324	Receptor
Basal Cell	hypoTH	ENSDARG00000095458	si:dkey-240h12.3	si:dkey-240h12.3	9.31e-06	0.573458
Basal Cell	hypoTH	ENSDARG00000030733	b3gat2	beta-1,3-glucuronyltransferase 2 (glucuronosyltransferase S)	9.47e-06	2.31656
Basal Cell	hypoTH	ENSDARG00000075027	fgfr1bl	fibroblast growth factor receptor 1b, like	9.76e-06	0.629837
Basal Cell	hypoTH	ENSDARG00000036299	nucb2a	nucleobindin 2a	1.06e-05	0.47104	Ligand
Basal Cell	hypoTH	ENSDARG00000032630	neb	nebulin	1.13e-05	0.463579
Basal Cell	hypoTH	ENSDARG00000040607	rtf2	replication termination factor 2	1.17e-05	0.33682
Basal Cell	hypoTH	ENSDARG00000104550	clcn2b	chloride channel, voltage-sensitive 2b	1.18e-05	0.341967
Basal Cell	hypoTH	ENSDARG00000068995	h2afx1	H2A histone family member X1	1.19e-05	0.679108
Basal Cell	hypoTH	ENSDARG00000028275	sult1st1	sulfotransferase family 1, cytosolic sulfotransferase 1	1.21e-05	0.751145
Basal Cell	hypoTH	ENSDARG00000042332	plin2	perilipin 2	1.22e-05	2.17431
Basal Cell	hypoTH	ENSDARG00000044551	atg9a	ATG9 autophagy related 9 homolog A (S. cerevisiae)	1.23e-05	0.632919
Basal Cell	hypoTH	ENSDARG00000074663	SAMD8		1.24e-05	0.941896
Basal Cell	hypoTH	ENSDARG00000058693	cast	calpastatin	1.33e-05	0.123202
Basal Cell	hypoTH	ENSDARG00000008568	slc25a24	solute carrier family 25 member 24	1.33e-05	0.269729
Basal Cell	hypoTH	ENSDARG00000029936	grtp1a	growth hormone regulated TBC protein 1a	1.34e-05	1.26612
Basal Cell	hypoTH	ENSDARG00000007494	st3gal8	ST3 beta-galactoside alpha-2,3-sialyltransferase 8	1.38e-05	0.641187
Basal Cell	hypoTH	ENSDARG00000025672	antxr1a	ANTXR cell adhesion molecule 1a	1.4e-05	0.908926
Basal Cell	hypoTH	ENSDARG00000018757	klf5l	Kruppel-like factor 5 like	1.4e-05	0.296292	TF	zf-C2H2
Basal Cell	hypoTH	ENSDARG00000076025	dgkzb	diacylglycerol kinase, zeta b	1.49e-05	0.390811
Basal Cell	hypoTH	ENSDARG00000078733	cnnm2b	cyclin and CBS domain divalent metal cation transport mediator 2b	1.51e-05	3.12145
Basal Cell	hypoTH	ENSDARG00000005799	smim14	small integral membrane protein 14	1.53e-05	1.3032
Basal Cell	hypoTH	ENSDARG00000058644	dnajb2	DnaJ heat shock protein family (Hsp40) member B2	1.58e-05	0.847763
Basal Cell	hypoTH	ENSDARG00000010052	ndrg3b	ndrg family member 3b	1.62e-05	0.163064
Basal Cell	hypoTH	ENSDARG00000000837	snx9a	sorting nexin 9a	1.67e-05	0.409225
Basal Cell	hypoTH	ENSDARG00000078108	dok1a	docking protein 1a	1.69e-05	0.314331
Basal Cell	hypoTH	ENSDARG00000017119	vps37a	VPS37A subunit of ESCRT-I	1.72e-05	0.564637
Basal Cell	hypoTH	ENSDARG00000103370	lrrc8da	leucine rich repeat containing 8 VRAC subunit Da	1.74e-05	0.573326
Basal Cell	hypoTH	ENSDARG00000090035	rtn4r	reticulon 4 receptor	1.89e-05	0.938061	Receptor
Basal Cell	hypoTH	ENSDARG00000100795	timp4.3	TIMP metallopeptidase inhibitor 4, tandem duplicate 3	1.94e-05	3.22953
Basal Cell	hypoTH	ENSDARG00000063190	zranb1b	zinc finger, RAN-binding domain containing 1b	1.96e-05	0.54764
Basal Cell	hypoTH	ENSDARG00000079552	maml3	mastermind-like transcriptional coactivator 3	1.96e-05	0.198932	TF-cofactor	MAML
Basal Cell	hypoTH	ENSDARG00000099199	itchb	itchy E3 ubiquitin protein ligase b	1.96e-05	0.453969	TF-cofactor	Others
Basal Cell	hypoTH	ENSDARG00000007960	hnrnpaba	heterogeneous nuclear ribonucleoprotein A/Ba	2.01e-05	0.328695
Basal Cell	hypoTH	ENSDARG00000087417	zdhhc5b	zinc finger, DHHC-type containing 5b	2.04e-05	0.386523
Basal Cell	hypoTH	ENSDARG00000006812	wdr26b	WD repeat domain 26b	2.06e-05	0.274072
Basal Cell	hypoTH	ENSDARG00000033614	rasgef1ba	RasGEF domain family, member 1Ba	2.19e-05	0.570398
Basal Cell	hypoTH	ENSDARG00000031795	abcf1	ATP-binding cassette, sub-family F (GCN20), member 1	2.22e-05	0.458049
Basal Cell	hypoTH	ENSDARG00000090548	CR753886.1		2.26e-05	0.644256
Basal Cell	hypoTH	ENSDARG00000061131	kif21a	kinesin family member 21A	2.27e-05	0.864511
Basal Cell	hypoTH	ENSDARG00000024966	MARK4		2.31e-05	0.242008
Basal Cell	hypoTH	ENSDARG00000089878	nedd9	neural precursor cell expressed, developmentally down-regulated 9	2.41e-05	0.243293
Basal Cell	hypoTH	ENSDARG00000097635	wu:fb18f06	wu:fb18f06	2.43e-05	0.73577
Basal Cell	hypoTH	ENSDARG00000053113	ly75	lymphocyte antigen 75	2.48e-05	0.464613
Basal Cell	hypoTH	ENSDARG00000036298	rps13	ribosomal protein S13	2.49e-05	0.366058
Basal Cell	hypoTH	ENSDARG00000094854	ms4a17a.9	membrane-spanning 4-domains, subfamily A, member 17A.9	2.49e-05	0.608871
Basal Cell	hypoTH	ENSDARG00000070651	prkcdb	protein kinase C, delta b	2.53e-05	0.406876
Basal Cell	hypoTH	ENSDARG00000029476	ldlra	low density lipoprotein receptor a	2.56e-05	0.555546	Receptor
Basal Cell	hypoTH	ENSDARG00000103271	pla2g15	phospholipase A2, group XV	2.58e-05	0.689605
Basal Cell	hypoTH	ENSDARG00000062469	hipk3a	homeodomain interacting protein kinase 3a	2.59e-05	0.183476
Basal Cell	hypoTH	ENSDARG00000100913	arhgef12b	Rho guanine nucleotide exchange factor (GEF) 12b	2.64e-05	0.187358
Basal Cell	hypoTH	ENSDARG00000058327	neu3.3	sialidase 3 (membrane sialidase), tandem duplicate 3	2.73e-05	1.40616
Basal Cell	hypoTH	ENSDARG00000052734	hmgcra	3-hydroxy-3-methylglutaryl-CoA reductase a	2.74e-05	0.519259
Basal Cell	hypoTH	ENSDARG00000009402	si:ch211-210b2.2	si:ch211-210b2.2	2.79e-05	1.25771
Basal Cell	hypoTH	ENSDARG00000000666	creg2	cellular repressor of E1A-stimulated genes 2	2.96e-05	0.782107
Basal Cell	hypoTH	ENSDARG00000012688	eif1b	eukaryotic translation initiation factor 1B	3.01e-05	0.319153
Basal Cell	hypoTH	ENSDARG00000001234	map4k2	mitogen-activated protein kinase kinase kinase kinase 2	3.04e-05	0.46178
Basal Cell	hypoTH	ENSDARG00000057249	zmynd11	zinc finger, MYND-type containing 11	3.06e-05	0.25859
Basal Cell	hypoTH	ENSDARG00000024815	ogfrl2	opioid growth factor receptor-like 2	3.08e-05	1.50839	Receptor
Basal Cell	hypoTH	ENSDARG00000087844	plekhn1	pleckstrin homology domain containing, family N member 1	3.08e-05	0.569919
Basal Cell	hypoTH	ENSDARG00000096365	si:ch211-195m9.3	si:ch211-195m9.3	3.11e-05	1.12241
Basal Cell	hypoTH	ENSDARG00000021869	rcan2	regulator of calcineurin 2	3.19e-05	0.795567
Basal Cell	hypoTH	ENSDARG00000102221	HACD4		3.34e-05	0.637428
Basal Cell	hypoTH	ENSDARG00000004748	zgc:100868	zgc:100868	3.36e-05	0.528185
Basal Cell	hypoTH	ENSDARG00000076800	tnfrsf18	tumor necrosis factor receptor superfamily, member 18	3.45e-05	1.93187
Basal Cell	hypoTH	ENSDARG00000036073	cebpg	CCAAT enhancer binding protein gamma	3.46e-05	0.698268	TF	TF_bZIP
Basal Cell	hypoTH	ENSDARG00000099766	myl12.1	myosin, light chain 12, genome duplicate 1	3.46e-05	0.205461
Basal Cell	hypoTH	ENSDARG00000079530	si:dkey-17m8.1	si:dkey-17m8.1	3.6e-05	0.590928
Basal Cell	hypoTH	ENSDARG00000055575	pcolce2b	procollagen C-endopeptidase enhancer 2b	3.76e-05	0.703337
Basal Cell	hypoTH	ENSDARG00000044169	prelid1b	PRELI domain containing 1b	3.8e-05	1.12094
Basal Cell	hypoTH	ENSDARG00000040649	prickle1a	prickle homolog 1a	3.95e-05	0.855985
Basal Cell	hypoTH	ENSDARG00000112756	CU468896.1		4e-05	1.01099
Basal Cell	hypoTH	ENSDARG00000018691	phf2	PHD finger protein 2	4.18e-05	0.334267	TF-cofactor	PHF
Basal Cell	hypoTH	ENSDARG00000029596	trim55a	tripartite motif containing 55a	4.21e-05	1.72423
Basal Cell	hypoTH	ENSDARG00000062518	ulk1a	unc-51 like autophagy activating kinase 1a	4.31e-05	0.609292
Basal Cell	hypoTH	ENSDARG00000062359	scn3b	sodium channel, voltage-gated, type III, beta	4.4e-05	1.97605
Basal Cell	hypoTH	ENSDARG00000020475	znrf1	zinc and ring finger 1	4.48e-05	0.334442
Basal Cell	hypoTH	ENSDARG00000044521	eef1b2	eukaryotic translation elongation factor 1 beta 2	4.55e-05	0.306478
Basal Cell	hypoTH	ENSDARG00000034187	calm3a	calmodulin 3a (phosphorylase kinase, delta)	4.6e-05	0.614569	Ligand
Basal Cell	hypoTH	ENSDARG00000101008	soul4	heme-binding protein soul4	4.91e-05	0.810177
Basal Cell	hypoTH	ENSDARG00000017636	rnf167	ring finger protein 167	4.96e-05	0.459399
Basal Cell	hypoTH	ENSDARG00000062003	myo5b	myosin VB	4.96e-05	0.340107
Basal Cell	hypoTH	ENSDARG00000014024	ms4a17a.4	membrane-spanning 4-domains, subfamily A, member 17A.4	5.08e-05	0.84182
Basal Cell	hypoTH	ENSDARG00000071331	ryr3	ryanodine receptor 3	5.18e-05	0.75272
Basal Cell	hypoTH	ENSDARG00000101762	fah	fumarylacetoacetate hydrolase (fumarylacetoacetase)	5.26e-05	0.595665
Basal Cell	hypoTH	ENSDARG00000007867	dazap2	DAZ associated protein 2	5.31e-05	0.544515
Basal Cell	hypoTH	ENSDARG00000103718	chmp5b	charged multivesicular body protein 5b	5.5e-05	0.670827
Basal Cell	hypoTH	ENSDARG00000012341	capn9	calpain 9	5.88e-05	0.694612
Basal Cell	hypoTH	ENSDARG00000009839	fam117bb	family with sequence similarity 117 member Bb	6.34e-05	0.418427
Basal Cell	hypoTH	ENSDARG00000035909	mfsd2ab	major facilitator superfamily domain containing 2ab	6.35e-05	0.663153
Basal Cell	hypoTH	ENSDARG00000024775	si:ch211-129c21.1	si:ch211-129c21.1	6.85e-05	0.257629	Ligand
Basal Cell	hypoTH	ENSDARG00000054271	cdkn1bb	cyclin-dependent kinase inhibitor 1Bb	6.87e-05	0.358357	TF-cofactor	Cyclin
Basal Cell	hypoTH	ENSDARG00000060113	znf395a	zinc finger protein 395a	6.93e-05	0.706619	TF	Others
Basal Cell	hypoTH	ENSDARG00000052746	grinab	glutamate receptor, ionotropic, N-methyl D-aspartate-associated protein 1b (glutamate binding)	7.42e-05	0.554374
Basal Cell	hypoTH	ENSDARG00000075685	tlr7	toll-like receptor 7	7.52e-05	0.8578
Basal Cell	hypoTH	ENSDARG00000104716	zgc:91849	zgc:91849	7.53e-05	0.612695
Basal Cell	hypoTH	ENSDARG00000035871	rpl30	ribosomal protein L30	8.03e-05	0.348268
Basal Cell	hypoTH	ENSDARG00000036549	agpat3	1-acylglycerol-3-phosphate O-acyltransferase 3	8.12e-05	0.240259
Basal Cell	hypoTH	ENSDARG00000010572	slc25a25a	solute carrier family 25 member 25a	8.27e-05	0.822787
Basal Cell	hypoTH	ENSDARG00000014867	rpl8	ribosomal protein L8	8.38e-05	0.209355
Basal Cell	hypoTH	ENSDARG00000043313	ank2b	ankyrin 2b, neuronal	8.47e-05	0.543808
Basal Cell	hypoTH	ENSDARG00000042126	elmo3	engulfment and cell motility 3	8.53e-05	0.221072
Basal Cell	hypoTH	ENSDARG00000022659	snx4	sorting nexin 4	8.88e-05	0.381786
Basal Cell	hypoTH	ENSDARG00000033539	paics	phosphoribosylaminoimidazole carboxylase, phosphoribosylaminoimidazole succinocarboxamide synthetase	9.28e-05	0.523257
Basal Cell	hypoTH	ENSDARG00000005078	eif4e3	eukaryotic translation initiation factor 4E family member 3	9.36e-05	0.478768
Basal Cell	hypoTH	ENSDARG00000100231	ccdc135	coiled-coil domain containing 135	0.000103986	1.51866
Basal Cell	hypoTH	ENSDARG00000099923	zgc:154054	zgc:154054	0.000108307	0.932104
Basal Cell	hypoTH	ENSDARG00000036161	hnrnpa0l	heterogeneous nuclear ribonucleoprotein A0, like	0.000108795	0.368169
Basal Cell	hypoTH	ENSDARG00000025254	s100a10b	S100 calcium binding protein A10b	0.000108956	0.22264	TF-cofactor	Others
Basal Cell	hypoTH	ENSDARG00000056331	ahcyl1	adenosylhomocysteinase-like 1	0.000114798	0.44647
Basal Cell	hypoTH	ENSDARG00000097537	wwp1	WW domain containing E3 ubiquitin protein ligase 1	0.000116629	0.651895	TF-cofactor	WW
Basal Cell	hypoTH	ENSDARG00000060854	kctd3	potassium channel tetramerization domain containing 3	0.000117123	0.51025
Basal Cell	hypoTH	ENSDARG00000019917	epb41l3b	erythrocyte membrane protein band 4.1-like 3b	0.000119448	0.353051
Basal Cell	hypoTH	ENSDARG00000021811	calm1a	calmodulin 1a	0.000119448	0.711631
Basal Cell	hypoTH	ENSDARG00000030981	tmem127	transmembrane protein 127	0.000121271	0.581047
Basal Cell	hypoTH	ENSDARG00000058522	shq1	SHQ1, H/ACA ribonucleoprotein assembly factor	0.000121925	0.459599
Basal Cell	hypoTH	ENSDARG00000043705	mob3c	MOB kinase activator 3C	0.000131739	0.61878
Basal Cell	hypoTH	ENSDARG00000101260	GPATCH2		0.000131898	0.372791
Basal Cell	hypoTH	ENSDARG00000002909	tjp3	tight junction protein 3	0.000133218	0.450586
Basal Cell	hypoTH	ENSDARG00000059404	rab43	RAB43, member RAS oncogene family	0.000137375	0.993421
Basal Cell	hypoTH	ENSDARG00000009250	etfb	electron transfer flavoprotein subunit beta	0.000139862	0.698424
Basal Cell	hypoTH	ENSDARG00000061941	trpv4	transient receptor potential cation channel, subfamily V, member 4	0.000140521	0.375155
Basal Cell	hypoTH	ENSDARG00000016773	cishb	cytokine inducible SH2-containing protein b	0.000144668	1.88548
Basal Cell	hypoTH	ENSDARG00000101471	fgd4a	FYVE, RhoGEF and PH domain containing 4a	0.000147487	0.25596
Basal Cell	hypoTH	ENSDARG00000014790	g3bp2	GTPase activating protein (SH3 domain) binding protein 2	0.000151139	0.498885
Basal Cell	hypoTH	ENSDARG00000074808	megf6b	multiple EGF-like-domains 6b	0.00016677	1.21434
Basal Cell	hypoTH	ENSDARG00000030602	rps19	ribosomal protein S19	0.000168428	0.325551
Basal Cell	hypoTH	ENSDARG00000040635	rnf11b	ring finger protein 11b	0.000168428	0.378088
Basal Cell	hypoTH	ENSDARG00000075919	ccser1	coiled-coil serine-rich protein 1	0.000175067	0.244601
Basal Cell	hypoTH	ENSDARG00000093444	si:dkey-106l3.7	si:dkey-106l3.7	0.000181681	0.614569
Basal Cell	hypoTH	ENSDARG00000069752	ckba	creatine kinase, brain a	0.000183315	0.560674
Basal Cell	hypoTH	ENSDARG00000074876	abcd1	ATP-binding cassette, sub-family D (ALD), member 1	0.000188281	0.506003
Basal Cell	hypoTH	ENSDARG00000009018	rhbg	Rh family, B glycoprotein (gene/pseudogene)	0.00019159	0.481519
Basal Cell	hypoTH	ENSDARG00000034677	scel	sciellin	0.00019159	0.411024
Basal Cell	hypoTH	ENSDARG00000069603	taok1a	TAO kinase 1a	0.00019159	0.263589
Basal Cell	hypoTH	ENSDARG00000087196	fibinb	fin bud initiation factor b	0.000194887	0.948576
Basal Cell	hypoTH	ENSDARG00000102191	CPNE8		0.000194887	0.612388
Basal Cell	hypoTH	ENSDARG00000102026	gpsm2l	G protein signaling modulator 2, like	0.000196529	0.303883
Basal Cell	hypoTH	ENSDARG00000102106	tgm1l1	transglutaminase 1 like 1	0.000196529	0.275984
Basal Cell	hypoTH	ENSDARG00000078145	si:ch211-218g4.2	si:ch211-218g4.2	0.000199836	0.243452
Basal Cell	hypoTH	ENSDARG00000021033	herpud2	HERPUD family member 2	0.00020482	0.411931
Basal Cell	hypoTH	ENSDARG00000069453	zgc:113314	zgc:113314	0.00020482	1.56365
Basal Cell	hypoTH	ENSDARG00000030440	rsrp1	arginine/serine-rich protein 1	0.000208113	0.383096
Basal Cell	hypoTH	ENSDARG00000090844	CABZ01054965.1		0.000211417	0.542596
Basal Cell	hypoTH	ENSDARG00000010085	p4ha2	procollagen-proline, 2-oxoglutarate 4-dioxygenase (proline 4-hydroxylase), alpha polypeptide 2	0.000224708	0.368826
Basal Cell	hypoTH	ENSDARG00000093406	zgc:111986	zgc:111986	0.000224708	0.41013
Basal Cell	hypoTH	ENSDARG00000019549	cds1	CDP-diacylglycerol synthase (phosphatidate cytidylyltransferase) 1	0.000226345	0.725651
Basal Cell	hypoTH	ENSDARG00000104937	PTPRD		0.000227995	0.450037
Basal Cell	hypoTH	ENSDARG00000008141	rbl1	retinoblastoma-like 1 (p107)	0.000242944	0.887863	TF-cofactor	Other_Co-activator/repressors
Basal Cell	hypoTH	ENSDARG00000104384	AGBL1		0.000246257	0.559099
Basal Cell	hypoTH	ENSDARG00000054458	slmapa	sarcolemma associated protein a	0.000247906	0.187587
Basal Cell	hypoTH	ENSDARG00000061398	epb41l4b	erythrocyte membrane protein band 4.1 like 4B	0.000247906	0.427867
Basal Cell	hypoTH	ENSDARG00000052419	ankrd12	ankyrin repeat domain 12	0.000261154	0.216005
Basal Cell	hypoTH	ENSDARG00000045749	ppfibp1a	PPFIA binding protein 1a	0.000266128	0.643428
Basal Cell	hypoTH	ENSDARG00000031720	clstn1	calsyntenin 1	0.000284305	0.187754
Basal Cell	hypoTH	ENSDARG00000057719	atl2	atlastin GTPase 2	0.00028595	0.432831
Basal Cell	hypoTH	ENSDARG00000102470	mpp7a	membrane protein, palmitoylated 7a (MAGUK p55 subfamily member 7)	0.000292565	0.218333
Basal Cell	hypoTH	ENSDARG00000004160	reep3b	receptor accessory protein 3b	0.000295872	0.16775
Basal Cell	hypoTH	ENSDARG00000077726	nocta	nocturnin a	0.000297516	0.275923
Basal Cell	hypoTH	ENSDARG00000079672	efl1	elongation factor like GTPase 1	0.00029916	0.271601
Basal Cell	hypoTH	ENSDARG00000102981	cyp2k16	cytochrome P450, family 2, subfamily K, polypeptide16	0.000309113	0.909686
Basal Cell	hypoTH	ENSDARG00000006316	rpl23a	ribosomal protein L23a	0.000320708	0.287017
Basal Cell	hypoTH	ENSDARG00000037506	prps1b	phosphoribosyl pyrophosphate synthetase 1B	0.000333962	0.537789
Basal Cell	hypoTH	ENSDARG00000077308	gpr84	G protein-coupled receptor 84	0.00036212	2.3565
Basal Cell	hypoTH	ENSDARG00000004517	ppat	phosphoribosyl pyrophosphate amidotransferase	0.000367081	0.648803
Basal Cell	hypoTH	ENSDARG00000029063	clpxa	caseinolytic mitochondrial matrix peptidase chaperone subunit a	0.000367081	0.358105
Basal Cell	hypoTH	ENSDARG00000102599	si:ch1073-392o20.2	si:ch1073-392o20.2	0.000367081	0.37864
Basal Cell	hypoTH	ENSDARG00000004840	rassf1	Ras association domain family member 1	0.000371974	0.975011
Basal Cell	hypoTH	ENSDARG00000021242	mvp	major vault protein	0.000376911	0.446014
Basal Cell	hypoTH	ENSDARG00000100439	zgc:153383	zgc:153383	0.000376911	1.69449
Basal Cell	hypoTH	ENSDARG00000019191	2023-09-12	septin 12	0.000400036	0.110953
Basal Cell	hypoTH	ENSDARG00000076742	cyth1a	cytohesin 1a	0.000403331	0.161003
Basal Cell	hypoTH	ENSDARG00000010655	ppm1k	protein phosphatase, Mg2+/Mn2+ dependent, 1K	0.000408262	0.44796
Basal Cell	hypoTH	ENSDARG00000059836	ddit3	DNA-damage-inducible transcript 3	0.000418194	0.448664	TF	TF_bZIP
Basal Cell	hypoTH	ENSDARG00000102020	pnpla3	patatin-like phospholipase domain containing 3	0.00042644	0.965587
Basal Cell	hypoTH	ENSDARG00000099786	actn4	actinin, alpha 4	0.000442953	0.113021	TF-cofactor	Actin
Basal Cell	hypoTH	ENSDARG00000078163	hpse2	heparanase 2	0.000454539	0.637715
Basal Cell	hypoTH	ENSDARG00000038900	acadm	acyl-CoA dehydrogenase medium chain	0.000459488	0.565078
Basal Cell	hypoTH	ENSDARG00000074765	mhc1zja	major histocompatibility complex class I ZJA	0.000469384	1.06721
Basal Cell	hypoTH	ENSDARG00000059738	ptprsa	protein tyrosine phosphatase receptor type Sa	0.000474331	0.227154	Receptor
Basal Cell	hypoTH	ENSDARG00000029751	wbp1lb	WW domain binding protein 1-like b	0.000480907	0.284033
Basal Cell	hypoTH	ENSDARG00000035326	nccrp1	non-specific cytotoxic cell receptor protein 1	0.000495772	0.451774
Basal Cell	hypoTH	ENSDARG00000099269	si:dkeyp-115e12.7	si:dkeyp-115e12.7	0.000515576	0.935041
Basal Cell	hypoTH	ENSDARG00000076928	tet2	tet methylcytosine dioxygenase 2	0.000522176	0.237678	TF	Others
Basal Cell	hypoTH	ENSDARG00000045519	sfmbt2	Scm like with four mbt domains 2	0.000523802	0.243079	TF-cofactor	Others
Basal Cell	hypoTH	ENSDARG00000078284	phkb	phosphorylase kinase, beta	0.000533683	0.272662
Basal Cell	hypoTH	ENSDARG00000104326	si:dkey-183i3.9	si:dkey-183i3.9	0.000533683	3.88118
Basal Cell	hypoTH	ENSDARG00000052697	fam172a	family with sequence similarity 172 member A	0.00053859	0.209983
Basal Cell	hypoTH	ENSDARG00000003584	pla2g7	phospholipase A2, group VII (platelet-activating factor acetylhydrolase, plasma)	0.000541872	0.77189
Basal Cell	hypoTH	ENSDARG00000020926	creb3l3l	cAMP responsive element binding protein 3-like 3 like	0.000541872	0.528377	TF	TF_bZIP
Basal Cell	hypoTH	ENSDARG00000103683	inpp5b	inositol polyphosphate-5-phosphatase B	0.000543463	0.403905
Basal Cell	hypoTH	ENSDARG00000013931	eif3m	eukaryotic translation initiation factor 3, subunit M	0.000556685	0.486459
Basal Cell	hypoTH	ENSDARG00000044092	atp5if1b	ATP synthase inhibitory factor subunit 1b	0.000558308	0.642426
Basal Cell	hypoTH	ENSDARG00000067990	myhz1.1	myosin, heavy polypeptide 1.1, skeletal muscle	0.000558308	0.659598
Basal Cell	hypoTH	ENSDARG00000002552	mapkapk2a	MAPK activated protein kinase 2a	0.000564867	0.189733
Basal Cell	hypoTH	ENSDARG00000023110	mapk7	mitogen-activated protein kinase 7	0.000573114	0.655081
Basal Cell	hypoTH	ENSDARG00000003269	clcn3	chloride channel 3	0.000576392	0.278871
Basal Cell	hypoTH	ENSDARG00000079636	fam177a1	family with sequence similarity 177 member A1	0.000584568	0.606601
Basal Cell	hypoTH	ENSDARG00000100698	eva1bb	eva-1 homolog Bb (C. elegans)	0.000596088	0.926601
Basal Cell	hypoTH	ENSDARG00000099751	si:dkey-250k10.4	si:dkey-250k10.4	0.000597708	1.97269
Basal Cell	hypoTH	ENSDARG00000038025	cbx7a	chromobox homolog 7a	0.00061912	1.72893
Basal Cell	hypoTH	ENSDARG00000075600	si:dkeyp-41f9.3	si:dkeyp-41f9.3	0.000667005	0.9117
Basal Cell	hypoTH	ENSDARG00000098857	lifra	LIF receptor subunit alpha a	0.000709823	0.378126
Basal Cell	hypoTH	ENSDARG00000014914	lamp2	lysosomal-associated membrane protein 2	0.000719708	0.525142
Basal Cell	hypoTH	ENSDARG00000077826	efcc1	EF-hand and coiled-coil domain containing 1	0.00075257	0.880273
Basal Cell	hypoTH	ENSDARG00000062374	leng9	leukocyte receptor cluster (LRC) member 9	0.000769017	1.04302
Basal Cell	hypoTH	ENSDARG00000002298	ankrd22	ankyrin repeat domain 22	0.000800246	0.770361
Basal Cell	hypoTH	ENSDARG00000007923	ptpn1	protein tyrosine phosphatase non-receptor type 1	0.000805157	0.556117
Basal Cell	hypoTH	ENSDARG00000013659	brox	BRO1 domain and CAAX motif containing	0.000810068	0.563854
Basal Cell	hypoTH	ENSDARG00000029263	hoxb3a	homeobox B3a	0.000819938	0.48208	TF	Homeobox
Basal Cell	hypoTH	ENSDARG00000045305	pde7a	phosphodiesterase 7A	0.000829806	0.254849
Basal Cell	hypoTH	ENSDARG00000100718	me2	malic enzyme 2, NAD(+)-dependent, mitochondrial	0.000829806	0.629276
Basal Cell	hypoTH	ENSDARG00000060554	mut	methylmalonyl CoA mutase	0.000846182	0.417425
Basal Cell	hypoTH	ENSDARG00000055591	pipox	pipecolic acid oxidase	0.000851089	1.02587
Basal Cell	hypoTH	ENSDARG00000102583	il4r.1	interleukin 4 receptor, tandem duplicate 1	0.000852638	0.793413
Basal Cell	hypoTH	ENSDARG00000012942	itgb5	integrin, beta 5	0.000854239	0.242077	Receptor
Basal Cell	hypoTH	ENSDARG00000099799	si:dkey-11f4.16	si:dkey-11f4.16	0.000870551	0.701062
Basal Cell	hypoTH	ENSDARG00000035557	gabarapa	GABA(A) receptor-associated protein a	0.000873749	0.974572
Basal Cell	hypoTH	ENSDARG00000086996	si:ch73-234b20.5	si:ch73-234b20.5	0.000886909	0.667679
Basal Cell	hypoTH	ENSDARG00000070922	cnbpb	CCHC-type zinc finger, nucleic acid binding protein b	0.000914876	0.407584	TF	Others
Basal Cell	hypoTH	ENSDARG00000071235	si:ch211-117c9.5	si:ch211-117c9.5	0.000919774	1.32372
Basal Cell	hypoTH	ENSDARG00000041078	chka	choline kinase alpha	0.000926323	0.717887
Basal Cell	hypoTH	ENSDARG00000045296	cops9	COP9 signalosome subunit 9	0.000936174	0.882527
Basal Cell	hypoTH	ENSDARG00000078772	nbr1b	NBR1 autophagy cargo receptor b	0.000950976	0.54678
Basal Cell	hypoTH	ENSDARG00000031777	pparaa	peroxisome proliferator-activated receptor alpha a	0.000973795	0.818482	TF	THR-like
Basal Cell	hypoTH	ENSDARG00000011665	aldoaa	aldolase a, fructose-bisphosphate, a	0.00099024	0.389786
Basal Cell	hypoTH	ENSDARG00000063509	lrrc58b	leucine rich repeat containing 58b	0.00100668	0.411606
Basal Cell	hypoTH	ENSDARG00000058302	sh3bgrl	SH3 domain binding glutamate-rich protein like	0.0010362	0.520064
Basal Cell	hypoTH	ENSDARG00000094041	krt17	keratin 17	0.00105746	0.410253
Basal Cell	hypoTH	ENSDARG00000086881	ier2b	immediate early response 2b	0.00109032	1.6831
Basal Cell	hypoTH	ENSDARG00000070165	tnfrsf1b	tumor necrosis factor receptor superfamily, member 1B	0.00120348	0.819665	Receptor
Basal Cell	hypoTH	ENSDARG00000061345	wwp2	WW domain containing E3 ubiquitin protein ligase 2	0.00122806	0.257734	TF-cofactor	WW
Basal Cell	hypoTH	ENSDARG00000104656	si:dkeyp-97a10.3	si:dkeyp-97a10.3	0.00126394	0.823578
Basal Cell	hypoTH	ENSDARG00000079148	nckap5l	NCK-associated protein 5-like	0.0012754	0.253204
Basal Cell	hypoTH	ENSDARG00000030803	zgc:110006	zgc:110006	0.00128183	0.200345
Basal Cell	hypoTH	ENSDARG00000073996	prickle3	prickle homolog 3	0.00131133	0.251683
Basal Cell	hypoTH	ENSDARG00000067670	pomt1	protein-O-mannosyltransferase 1	0.00133596	0.471799
Basal Cell	hypoTH	ENSDARG00000056121	serac1	serine active site containing 1	0.00140489	0.877987
Basal Cell	hypoTH	ENSDARG00000044935	hpdb	4-hydroxyphenylpyruvate dioxygenase b	0.00142119	0.641765
Basal Cell	hypoTH	ENSDARG00000077697	si:dkey-105i14.1	si:dkey-105i14.1	0.00148688	1.06352
Basal Cell	hypoTH	ENSDARG00000114099	trim35-30	tripartite motif containing 35-30	0.00151624	3.13073
Basal Cell	hypoTH	ENSDARG00000056141	coq10b	coenzyme Q10B	0.00152767	0.849409
Basal Cell	hypoTH	ENSDARG00000101019	ext1b	exostosin glycosyltransferase 1b	0.00166256	0.215888
Basal Cell	hypoTH	ENSDARG00000032469	ampd3b	adenosine monophosphate deaminase 3b	0.00169517	0.271964
Basal Cell	hypoTH	ENSDARG00000037838	unkl	unk like zinc finger	0.00171142	0.351604
Basal Cell	hypoTH	ENSDARG00000042988	slc24a2	solute carrier family 24 member 2	0.00171142	1.49877
Basal Cell	hypoTH	ENSDARG00000069853	txndc9	thioredoxin domain containing 9	0.00172767	0.883902
Basal Cell	hypoTH	ENSDARG00000109678	dap1b	death associated protein 1b	0.00174402	0.91685
Basal Cell	hypoTH	ENSDARG00000036481	tcn2	transcobalamin II	0.00177649	1.47761	Ligand
Basal Cell	hypoTH	ENSDARG00000013892	sorl1	sortilin-related receptor, L(DLR class) A repeats containing	0.00184184	0.241212	Receptor
Basal Cell	hypoTH	ENSDARG00000037069	zdhhc14	zinc finger, DHHC-type containing 14	0.00184184	0.353354
Basal Cell	hypoTH	ENSDARG00000077596	phf24	PHD finger protein 24	0.00184184	2.16213
Basal Cell	hypoTH	ENSDARG00000087424	si:dkey-187j14.6	si:dkey-187j14.6	0.00184184	0.731369
Basal Cell	hypoTH	ENSDARG00000042370	ptafr	platelet-activating factor receptor	0.00185783	0.962876
Basal Cell	hypoTH	ENSDARG00000012848	arih2	ariadne homolog 2 (Drosophila)	0.0018906	0.367709
Basal Cell	hypoTH	ENSDARG00000038593	rspo4	R-spondin 4	0.0018906	1.35699	Ligand
Basal Cell	hypoTH	ENSDARG00000058231	nt5c2b	5'-nucleotidase, cytosolic IIb	0.0018906	0.22552
Basal Cell	hypoTH	ENSDARG00000061951	golgb1	golgin B1	0.0018906	0.203285
Basal Cell	hypoTH	ENSDARG00000025073	rpl18a	ribosomal protein L18a	0.00190658	0.234703
Basal Cell	hypoTH	ENSDARG00000043624	pqlc2		0.00197196	0.963873
Basal Cell	hypoTH	ENSDARG00000094282	dnah11	dynein, axonemal, heavy chain 11	0.00203744	1.46187
Basal Cell	hypoTH	ENSDARG00000035066	ubtf	upstream binding transcription factor	0.00205375	0.384289	TF	HMG
Basal Cell	hypoTH	ENSDARG00000028058	traf6	TNF receptor-associated factor 6	0.00213564	0.485213	TF-cofactor	Others
Basal Cell	hypoTH	ENSDARG00000037496	gria4a	glutamate receptor, ionotropic, AMPA 4a	0.00220108	0.357218
Basal Cell	hypoTH	ENSDARG00000067995	myhz1.2	myosin, heavy polypeptide 1.2, skeletal muscle	0.00221738	0.722867
Basal Cell	hypoTH	ENSDARG00000095296	si:ch73-274k23.1	si:ch73-274k23.1	0.00221738	1.85628
Basal Cell	hypoTH	ENSDARG00000021647	gnai1	guanine nucleotide binding protein (G protein), alpha inhibiting activity polypeptide 1	0.00224995	0.264791
Basal Cell	hypoTH	ENSDARG00000003032	eif4a1b	eukaryotic translation initiation factor 4A1B	0.00233178	0.275836
Basal Cell	hypoTH	ENSDARG00000058740	ube2r2	ubiquitin-conjugating enzyme E2R 2	0.00233178	0.541917
Basal Cell	hypoTH	ENSDARG00000028067	bnip3lb	BCL2 interacting protein 3 like b	0.00234777	0.567284
Basal Cell	hypoTH	ENSDARG00000045747	cped1	cadherin-like and PC-esterase domain containing 1	0.00239674	0.692603
Basal Cell	hypoTH	ENSDARG00000016253	ralab	v-ral simian leukemia viral oncogene homolog Ab (ras related)	0.00241301	0.520259
Basal Cell	hypoTH	ENSDARG00000004171	rabac1	Rab acceptor 1 (prenylated)	0.00251104	0.569415
Basal Cell	hypoTH	ENSDARG00000098214	CABZ01072487.1		0.00251104	0.401934
Basal Cell	hypoTH	ENSDARG00000098367	srp54	signal recognition particle 54	0.00252714	0.529115
Basal Cell	hypoTH	ENSDARG00000070986	sergef	secretion regulating guanine nucleotide exchange factor	0.00257621	0.574181
Basal Cell	hypoTH	ENSDARG00000045660	hic1l	hypermethylated in cancer 1 like	0.00259246	0.481673	TF	ZBTB
Basal Cell	hypoTH	ENSDARG00000061525	slka	STE20-like kinase a	0.00259246	0.261971
Basal Cell	hypoTH	ENSDARG00000061579	myo1cb	myosin Ic, paralog b	0.00265729	0.177041
Basal Cell	hypoTH	ENSDARG00000100781	col28a2b	collagen, type XXVIII, alpha 2b	0.002706	0.242709
Basal Cell	hypoTH	ENSDARG00000006019	tktb	transketolase b	0.00277126	0.621395
Basal Cell	hypoTH	ENSDARG00000091418	snx17	sorting nexin 17	0.00290227	0.306376
Basal Cell	hypoTH	ENSDARG00000077782	acer2	alkaline ceramidase 2	0.00291831	0.993006
Basal Cell	hypoTH	ENSDARG00000009136	tp53bp2a	tumor protein p53 binding protein, 2a	0.00293453	0.476948
Basal Cell	hypoTH	ENSDARG00000011459	gsna	gelsolin a	0.00293453	0.35264
Basal Cell	hypoTH	ENSDARG00000087742	map4k3a	mitogen-activated protein kinase kinase kinase kinase 3a	0.00298298	0.179635
Basal Cell	hypoTH	ENSDARG00000079835	man2c1	mannosidase, alpha, class 2C, member 1	0.00303197	0.428578
Basal Cell	hypoTH	ENSDARG00000022712	stat3	signal transducer and activator of transcription 3 (acute-phase response factor)	0.00317869	0.244418	TF	STAT
Basal Cell	hypoTH	ENSDARG00000088168	ablim3	actin binding LIM protein family, member 3	0.00319488	0.68696
Basal Cell	hypoTH	ENSDARG00000097289	BX629344.1		0.00324383	1.72893
Basal Cell	hypoTH	ENSDARG00000061328	cdon	cell adhesion associated, oncogene regulated	0.00332494	0.220673	Receptor
Basal Cell	hypoTH	ENSDARG00000018178	pgm2	phosphoglucomutase 2	0.00343833	0.690249
Basal Cell	hypoTH	ENSDARG00000104687	slc16a9b	solute carrier family 16 member 9b	0.00343833	0.450266
Basal Cell	hypoTH	ENSDARG00000015887	b2ml	beta-2-microglobulin, like	0.00348702	0.236299	Ligand
Basal Cell	hypoTH	ENSDARG00000055092	pora	P450 (cytochrome) oxidoreductase a	0.00350318	0.299153
Basal Cell	hypoTH	ENSDARG00000101317	grinaa	glutamate receptor, ionotropic, N-methyl D-aspartate-associated protein 1a (glutamate binding)	0.00350318	0.876499
Basal Cell	hypoTH	ENSDARG00000101312	si:dkey-31n13.4	si:dkey-31n13.4	0.00351891	0.958947
Basal Cell	hypoTH	ENSDARG00000059123	plcd1a	phospholipase C, delta 1a	0.00361644	0.261616
Basal Cell	hypoTH	ENSDARG00000062108	iffo1b	intermediate filament family orphan 1b	0.00363236	0.570474
Basal Cell	hypoTH	ENSDARG00000055523	slc22a6l	solute carrier family 22 member 6, like	0.00368123	1.81082
Basal Cell	hypoTH	ENSDARG00000032496	pon1	paraoxonase 1	0.00376257	0.559761
Basal Cell	hypoTH	ENSDARG00000078778	lrch1	leucine-rich repeats and calponin homology (CH) domain containing 1	0.00381141	0.203341
Basal Cell	hypoTH	ENSDARG00000021252	cct6a	chaperonin containing TCP1, subunit 6A (zeta 1)	0.0040719	0.356967
Basal Cell	hypoTH	ENSDARG00000105104	si:dkey-223p19.1	si:dkey-223p19.1	0.0040719	0.759637
Basal Cell	hypoTH	ENSDARG00000101406	rplp2	ribosomal protein, large P2	0.00408775	0.388727
Basal Cell	hypoTH	ENSDARG00000076280	ppp1r1b	protein phosphatase 1, regulatory (inhibitor) subunit 1B	0.0041529	0.344256
Basal Cell	hypoTH	ENSDARG00000044565	ola1	Obg-like ATPase 1	0.00416899	0.53162
Basal Cell	hypoTH	ENSDARG00000062785	adpgk2	ADP-dependent glucokinase 2	0.0044118	0.651558
Basal Cell	hypoTH	ENSDARG00000007485	epc2	enhancer of polycomb homolog 2 (Drosophila)	0.00450929	0.494017	TF-cofactor	Others
Basal Cell	hypoTH	ENSDARG00000027153	gabrr3a	gamma-aminobutyric acid (GABA) A receptor, rho 3a	0.00459014	1.39415
Basal Cell	hypoTH	ENSDARG00000043608	eif4ebp1	eukaryotic translation initiation factor 4E binding protein 1	0.00459014	0.698653
Basal Cell	hypoTH	ENSDARG00000071116	eepd1	endonuclease/exonuclease/phosphatase family domain containing 1	0.0046549	0.885722
Basal Cell	hypoTH	ENSDARG00000073843	myo9ab	myosin IXAb	0.0046549	0.486736
Basal Cell	hypoTH	ENSDARG00000041060	lgals9l3	lectin, galactoside-binding, soluble, 9 (galectin 9)-like 3	0.0048972	1.20928	TF-cofactor	Others
Basal Cell	hypoTH	ENSDARG00000079687	rnf10	ring finger protein 10	0.00501055	0.289979	TF-cofactor	Ring finger protein
Basal Cell	hypoTH	ENSDARG00000018602	rab5aa	RAB5A, member RAS oncogene family, a	0.00512417	0.263397
Basal Cell	hypoTH	ENSDARG00000110151	ank3b	ankyrin 3b	0.00512417	0.943828
Basal Cell	hypoTH	ENSDARG00000016745	slc35f6	solute carrier family 35 member F6	0.00552943	0.882833
Basal Cell	hypoTH	ENSDARG00000102097	nfkbiz	nuclear factor of kappa light polypeptide gene enhancer in B-cells inhibitor, zeta	0.00575708	0.835691
Basal Cell	hypoTH	ENSDARG00000010965	psma8	proteasome subunit alpha 8	0.00577303	0.474654
Basal Cell	hypoTH	ENSDARG00000034717	def6c	DEF6 guanine nucleotide exchange factor c	0.00577303	0.283109
Basal Cell	hypoTH	ENSDARG00000010132	dacha	dachshund a	0.00580494	0.516377	TF	DACH
Basal Cell	hypoTH	ENSDARG00000002377	mief2	mitochondrial elongation factor 2	0.0058861	0.679739
Basal Cell	hypoTH	ENSDARG00000022684	fkbp1aa	FKBP prolyl isomerase 1Aa	0.00590205	0.436101
Basal Cell	hypoTH	ENSDARG00000045847	si:ch211-214j24.10	si:ch211-214j24.10	0.00596653	0.475733
Basal Cell	hypoTH	ENSDARG00000006588	zgc:111983	zgc:111983	0.00614359	0.352517
Basal Cell	hypoTH	ENSDARG00000104555	sh2d3cb	SH2 domain containing 3Cb	0.00617581	0.795058
Basal Cell	hypoTH	ENSDARG00000025766	zgc:66440	zgc:66440	0.00627126	0.609582
Basal Cell	hypoTH	ENSDARG00000043581	gadd45aa	growth arrest and DNA-damage-inducible, alpha, a	0.00648262	0.947147
Basal Cell	hypoTH	ENSDARG00000001162	matr3l1.1	matrin 3-like 1.1	0.00683844	0.314942
Basal Cell	hypoTH	ENSDARG00000100916	uvssa	UV-stimulated scaffold protein A	0.00703296	0.333357
Basal Cell	hypoTH	ENSDARG00000020960	hgs	hepatocyte growth factor-regulated tyrosine kinase substrate	0.00716232	0.324106
Basal Cell	hypoTH	ENSDARG00000058252	adamts15b	ADAM metallopeptidase with thrombospondin type 1 motif, 15b	0.0072921	0.553399
Basal Cell	hypoTH	ENSDARG00000062752	mfap3l	microfibril associated protein 3 like	0.00735585	0.451001
Basal Cell	hypoTH	ENSDARG00000019613	ip6k2b	inositol hexakisphosphate kinase 2b	0.00748466	0.271109
Basal Cell	hypoTH	ENSDARG00000015315	psmc5	proteasome 26S subunit, ATPase 5	0.00758135	0.526986
Basal Cell	hypoTH	ENSDARG00000089413	mbpb	myelin basic protein b	0.00769382	0.228643
Basal Cell	hypoTH	ENSDARG00000089441	si:ch211-105c13.3	si:ch211-105c13.3	0.00793439	0.183979
Basal Cell	hypoTH	ENSDARG00000010953	ndel1a	nudE neurodevelopment protein 1-like 1a	0.00802898	0.45726
Basal Cell	hypoTH	ENSDARG00000058597	nt5c3a	5'-nucleotidase, cytosolic IIIA	0.008126	0.276261
Basal Cell	hypoTH	ENSDARG00000022832	bnip4	BCL2 interacting protein 4	0.008158	0.68969
Basal Cell	hypoTH	ENSDARG00000035719	arl5c	ADP-ribosylation factor-like 5C	0.00817375	0.540462
Basal Cell	hypoTH	ENSDARG00000060853	nckap1	NCK-associated protein 1	0.00822199	0.16192
Basal Cell	hypoTH	ENSDARG00000088584	si:ch73-352p18.4	si:ch73-352p18.4	0.00831795	1.09051
Basal Cell	hypoTH	ENSDARG00000078745	pnpla8	patatin-like phospholipase domain containing 8	0.00838242	0.646419
Basal Cell	hypoTH	ENSDARG00000001769	ptpra	protein tyrosine phosphatase receptor type A	0.00844688	0.147045	Receptor
Basal Cell	hypoTH	ENSDARG00000012467	spint1b	serine peptidase inhibitor, Kunitz type 1 b	0.00846208	0.509209	Ligand
Basal Cell	hypoTH	ENSDARG00000009868	dcaf11	ddb1 and cul4 associated factor 11	0.00863968	0.792251
Basal Cell	hypoTH	ENSDARG00000101190	cyp2k8	cytochrome P450, family 2, subfamily K, polypeptide 8	0.00872034	0.551595
Basal Cell	hypoTH	ENSDARG00000053542	kctd12.2	potassium channel tetramerisation domain containing 12.2	0.00894604	1.00403
Basal Cell	hypoTH	ENSDARG00000031954	rbck1	RanBP-type and C3HC4-type zinc finger containing 1	0.00897795	0.458072	TF	Others
Basal Cell	hypoTH	ENSDARG00000031968	cpped1	calcineurin-like phosphoesterase domain containing 1	0.00908992	0.341058
Basal Cell	hypoTH	ENSDARG00000044526	camk1ga	calcium/calmodulin-dependent protein kinase IGa	0.00917052	1.44671
Basal Cell	hypoTH	ENSDARG00000068140	si:dkey-24l11.2	si:dkey-24l11.2	0.00918618	0.62195
Basal Cell	hypoTH	ENSDARG00000070098	lcorl	ligand dependent nuclear receptor corepressor-like	0.00920184	0.414524	TF	HTH
Basal Cell	hypoTH	ENSDARG00000005774	ddx3xb	DEAD-box helicase 3 X-linked b	0.0092175	0.305342
Basal Cell	hypoTH	ENSDARG00000007418	chmp4c	charged multivesicular body protein 4C	0.00934618	0.694612
Basal Cell	hypoTH	ENSDARG00000052923	zgc:113162	zgc:113162	0.00939428	0.502865
Basal Cell	hypoTH	ENSDARG00000040712	adprh	ADP-ribosylarginine hydrolase	0.00957098	1.01473
Basal Cell	hypoTH	ENSDARG00000006691	rpl12	ribosomal protein L12	0.00989359	0.261064
Basal Cell	hypoTH	ENSDARG00000086724	im:7151449	im:7151449	0.0101518	0.352863
Basal Cell	hypoTH	ENSDARG00000100357	si:ch73-44m9.3	si:ch73-44m9.3	0.0101674	0.514769
Basal Cell	hypoTH	ENSDARG00000024829	tnn	tenascin N	0.0104587	1.51486
Basal Cell	hypoTH	ENSDARG00000058259	celsr1b	cadherin EGF LAG seven-pass G-type receptor 1b	0.0104587	0.365557
Basal Cell	hypoTH	ENSDARG00000068288	lamc2	laminin, gamma 2	0.0110039	0.151104	Ligand
Basal Cell	hypoTH	ENSDARG00000098129	si:dkeyp-97a10.2	si:dkeyp-97a10.2	0.0110356	1.2669
Basal Cell	hypoTH	ENSDARG00000063297	abcb6a	ATP-binding cassette, sub-family B (MDR/TAP), member 6a	0.0110673	0.887436
Basal Cell	hypoTH	ENSDARG00000043466	kcnk3a	potassium channel, subfamily K, member 3a	0.0113407	2.81707
Basal Cell	hypoTH	ENSDARG00000036040	atg13	ATG13 autophagy related 13 homolog (S. cerevisiae)	0.0115182	0.509921
Basal Cell	hypoTH	ENSDARG00000039997	ptp4a3a	protein tyrosine phosphatase 4A3a	0.0116633	0.263639
Basal Cell	hypoTH	ENSDARG00000016904	bckdk	branched chain ketoacid dehydrogenase kinase	0.0117752	0.378664
Basal Cell	hypoTH	ENSDARG00000099365	evx1	even-skipped homeobox 1	0.0118231	0.523987	TF	Homeobox
Basal Cell	hypoTH	ENSDARG00000075048	lonrf1	LON peptidase N-terminal domain and ring finger 1	0.0119188	0.261838
Basal Cell	hypoTH	ENSDARG00000103946	si:dkey-124l13.1	si:dkey-124l13.1	0.0119504	1.5353
Basal Cell	hypoTH	ENSDARG00000071091	chrm3a	cholinergic receptor, muscarinic 3a	0.0120623	1.69449	Receptor
Basal Cell	hypoTH	ENSDARG00000057708	zgc:175264	zgc:175264	0.0121101	0.351567	TF	Others
Basal Cell	hypoTH	ENSDARG00000076230	atp10b	ATPase phospholipid transporting 10B	0.0124162	0.331958
Basal Cell	hypoTH	ENSDARG00000090033	si:dkey-16p6.1	si:dkey-16p6.1	0.0124964	0.929063
Basal Cell	hypoTH	ENSDARG00000051749	tigara	tp53-induced glycolysis and apoptosis regulator a	0.0127376	0.832408
Basal Cell	hypoTH	ENSDARG00000002285	mcoln1a	mucolipin 1a	0.0127692	0.552939
Basal Cell	hypoTH	ENSDARG00000069956	pdlim2	PDZ and LIM domain 2 (mystique)	0.0127846	0.103573
Basal Cell	hypoTH	ENSDARG00000045019	aamp	angio-associated, migratory cell protein	0.0128161	0.653239
Basal Cell	hypoTH	ENSDARG00000035978	ube3c	ubiquitin protein ligase E3C	0.0129116	0.349075
Basal Cell	hypoTH	ENSDARG00000034262	pld2	phospholipase D2	0.0133298	0.330778	Receptor
Basal Cell	hypoTH	ENSDARG00000033443	mdm2	MDM2 proto-oncogene	0.0134908	0.623786
Basal Cell	hypoTH	ENSDARG00000100614	zgc:171497	zgc:171497	0.0134908	0.471114
Basal Cell	hypoTH	ENSDARG00000037870	actb2	actin, beta 2	0.0136832	0.131663	TF-cofactor	Actin
Basal Cell	hypoTH	ENSDARG00000110186	LO018535.1		0.0139071	0.328176
Basal Cell	hypoTH	ENSDARG00000013144	atp1b1a	ATPase Na+/K+ transporting subunit beta 1a	0.0141649	0.37653
Basal Cell	hypoTH	ENSDARG00000023082	krt1-19d	keratin, type 1, gene 19d	0.0141964	0.710901
Basal Cell	hypoTH	ENSDARG00000045514	atp5f1c	ATP synthase F1 subunit gamma	0.014244	0.493688
Basal Cell	hypoTH	ENSDARG00000104820	psd3l	pleckstrin and Sec7 domain containing 3, like	0.014403	0.190613
Basal Cell	hypoTH	ENSDARG00000017781	hsd17b10	hydroxysteroid (17-beta) dehydrogenase 10	0.0147568	1.04535
Basal Cell	hypoTH	ENSDARG00000017311	gpsm2	G protein signaling modulator 2	0.0151276	0.39515
Basal Cell	hypoTH	ENSDARG00000013670	hyou1	hypoxia up-regulated 1	0.0153358	0.334548
Basal Cell	hypoTH	ENSDARG00000025824	dmtf1	cyclin D binding myb-like transcription factor 1	0.0163186	0.791239	TF	MYB
Basal Cell	hypoTH	ENSDARG00000099776	glula	glutamate-ammonia ligase (glutamine synthase) a	0.0163186	1.06015
Basal Cell	hypoTH	ENSDARG00000017891	tcp1	t-complex 1	0.0166376	0.412861
Basal Cell	hypoTH	ENSDARG00000038094	clec16a	C-type lectin domain containing 16A	0.0167981	0.215488
Basal Cell	hypoTH	ENSDARG00000017772	mdh1aa	malate dehydrogenase 1Aa, NAD (soluble)	0.0169575	0.474636
Basal Cell	hypoTH	ENSDARG00000043646	slc6a8	solute carrier family 6 member 8	0.0169575	0.46395
Basal Cell	hypoTH	ENSDARG00000004173	copa	coatomer protein complex, subunit alpha	0.0174366	0.248428
Basal Cell	hypoTH	ENSDARG00000025076	marveld2a	MARVEL domain containing 2a	0.017597	0.332321
Basal Cell	hypoTH	ENSDARG00000070843	arid3a	AT rich interactive domain 3A (BRIGHT-like)	0.0180779	0.243951	TF	ARID
Basal Cell	hypoTH	ENSDARG00000114796	JMY		0.0180779	0.644967
Basal Cell	hypoTH	ENSDARG00000086075	ttc3	tetratricopeptide repeat domain 3	0.0185575	0.25968
Basal Cell	hypoTH	ENSDARG00000058984	rad23ab	RAD23 homolog A, nucleotide excision repair protein b	0.0188768	0.816596
Basal Cell	hypoTH	ENSDARG00000100225	kif16ba	kinesin family member 16Ba	0.0190358	0.493048
Basal Cell	hypoTH	ENSDARG00000091699	capn2a	calpain 2, (m/II) large subunit a	0.019356	0.214654
Basal Cell	hypoTH	ENSDARG00000060944	rnf217	ring finger protein 217	0.0196762	0.25396
Basal Cell	hypoTH	ENSDARG00000068478	gpx4a	glutathione peroxidase 4a	0.0199975	0.992498
Basal Cell	hypoTH	ENSDARG00000009217	tom1l2	target of myb1 like 2 membrane trafficking protein	0.0201575	0.364475
Basal Cell	hypoTH	ENSDARG00000058044	rab1ba	zRAB1B, member RAS oncogene family a	0.0203175	0.34298
Basal Cell	hypoTH	ENSDARG00000014098	pkd2	polycystic kidney disease 2	0.0206387	0.451958
Basal Cell	hypoTH	ENSDARG00000103919	si:ch73-1a9.3	si:ch73-1a9.3	0.0211185	0.330057
Basal Cell	hypoTH	ENSDARG00000015709	hsd17b12a	hydroxysteroid (17-beta) dehydrogenase 12a	0.0212784	0.384898
Basal Cell	hypoTH	ENSDARG00000003444	dhrs7	dehydrogenase/reductase (SDR family) member 7	0.0217593	0.635944
Basal Cell	hypoTH	ENSDARG00000037421	egr1	early growth response 1	0.0224012	1.19439	TF	zf-C2H2
Basal Cell	hypoTH	ENSDARG00000071010	tuft1b	tuftelin 1b	0.0224012	0.289147
Basal Cell	hypoTH	ENSDARG00000018382	prkcha	protein kinase C, eta, a	0.0227207	0.625712
Basal Cell	hypoTH	ENSDARG00000086342	zgc:101566	zgc:101566	0.0227207	0.339054
Basal Cell	hypoTH	ENSDARG00000103457	spartb	spartin b	0.022879	0.676127
Basal Cell	hypoTH	ENSDARG00000103973	CABZ01051602.1		0.022879	2.06366
Basal Cell	hypoTH	ENSDARG00000042934	ccn2a	cellular communication network factor 2a	0.0230373	2.26139	Ligand
Basal Cell	hypoTH	ENSDARG00000020976	ubald1b	UBA-like domain containing 1b	0.0241605	0.588367
Basal Cell	hypoTH	ENSDARG00000054304	homeza	homeobox and leucine zipper encoding a	0.0244811	1.63314	TF	Homeobox
Basal Cell	hypoTH	ENSDARG00000060280	pde9a	phosphodiesterase 9A	0.0251222	1.64236
Basal Cell	hypoTH	ENSDARG00000042726	grb7	growth factor receptor bound protein 7	0.0252817	0.608904
Basal Cell	hypoTH	ENSDARG00000103200	gpr107	G protein-coupled receptor 107	0.0254412	0.435393
Basal Cell	hypoTH	ENSDARG00000055054	bcl9l	bcl9 like	0.0264007	0.270798	TF-cofactor	BCL
Basal Cell	hypoTH	ENSDARG00000078890	wdfy3	WD repeat and FYVE domain containing 3	0.0264007	0.187156
Basal Cell	hypoTH	ENSDARG00000054447	slc29a1b	solute carrier family 29 member 1b	0.0267177	0.590664
Basal Cell	hypoTH	ENSDARG00000068575	tmem51a	transmembrane protein 51a	0.0267177	0.623008
Basal Cell	hypoTH	ENSDARG00000014239	esyt1b	extended synaptotagmin-like protein 1b	0.0268753	0.427512
Basal Cell	hypoTH	ENSDARG00000062315	sik2b	salt-inducible kinase 2b	0.0270329	0.178853
Basal Cell	hypoTH	ENSDARG00000074894	myorg	myogenesis regulating glycosidase (putative)	0.0270329	0.864224
Basal Cell	hypoTH	ENSDARG00000029533	rpl18	ribosomal protein L18	0.0271887	0.211081
Basal Cell	hypoTH	ENSDARG00000100499	cpeb4b	cytoplasmic polyadenylation element binding protein 4b	0.0275088	0.23479
Basal Cell	hypoTH	ENSDARG00000059079	vps25	vacuolar protein sorting 25 homolog	0.0279862	0.605267
Basal Cell	hypoTH	ENSDARG00000101028	fnbp1b	formin binding protein 1b	0.0281435	0.446689
Basal Cell	hypoTH	ENSDARG00000070573	mapk3	mitogen-activated protein kinase 3	0.0284616	0.428937
Basal Cell	hypoTH	ENSDARG00000092499	si:ch211-183d21.1	si:ch211-183d21.1	0.0284616	0.44562
Basal Cell	hypoTH	ENSDARG00000023181	pcp4l1	Purkinje cell protein 4 like 1	0.0286171	2.18627
Basal Cell	hypoTH	ENSDARG00000068629	cd151l	CD151 antigen, like	0.0286171	0.236158	Receptor
Basal Cell	hypoTH	ENSDARG00000067997	myhz1.3	myosin, heavy polypeptide 1.3, skeletal muscle	0.0287725	1.15714
Basal Cell	hypoTH	ENSDARG00000051926	plag1	pleiomorphic adenoma gene 1	0.0297239	0.478233	TF	zf-C2H2
Basal Cell	hypoTH	ENSDARG00000069377	si:dkey-242g16.2	si:dkey-242g16.2	0.0298828	0.759151
Basal Cell	hypoTH	ENSDARG00000068830	zgc:172139	zgc:172139	0.0300416	0.600465
Basal Cell	hypoTH	ENSDARG00000091090	xirp2b	xin actin binding repeat containing 2b	0.0300416	0.796169
Basal Cell	hypoTH	ENSDARG00000077004	aldh1l1	aldehyde dehydrogenase 1 family, member L1	0.0301984	0.406435
Basal Cell	hypoTH	ENSDARG00000043453	rps5	ribosomal protein S5	0.0305178	0.246266
Basal Cell	hypoTH	ENSDARG00000003910	med13b	mediator complex subunit 13b	0.0306746	0.312371
Basal Cell	hypoTH	ENSDARG00000102937	hspbp1	HSPA (heat shock 70kDa) binding protein, cytoplasmic cochaperone 1	0.0306746	1.06352
Basal Cell	hypoTH	ENSDARG00000035660	si:ch211-193k19.1	si:ch211-193k19.1	0.0313073	0.514151
Basal Cell	hypoTH	ENSDARG00000010098	pank1b	pantothenate kinase 1b	0.0316185	0.354597
Basal Cell	hypoTH	ENSDARG00000023217	crema	cAMP responsive element modulator a	0.032096	0.404538	TF	TF_bZIP
Basal Cell	hypoTH	ENSDARG00000056630	angptl5	angiopoietin-like 5	0.032096	1.6784
Basal Cell	hypoTH	ENSDARG00000101459	si:dkey-279j5.1	si:dkey-279j5.1	0.0322525	1.08204
Basal Cell	hypoTH	ENSDARG00000079104	mfhas1	malignant fibrous histiocytoma amplified sequence 1	0.0324089	0.614569
Basal Cell	hypoTH	ENSDARG00000056557	copb1	coatomer protein complex, subunit beta 1	0.0338444	0.339806
Basal Cell	hypoTH	ENSDARG00000018460	mbnl2	muscleblind-like splicing regulator 2	0.0339984	0.140314
Basal Cell	hypoTH	ENSDARG00000005230	ssr2	signal sequence receptor, beta	0.0343149	0.373059
Basal Cell	hypoTH	ENSDARG00000024306	zbed4	zinc finger, BED-type containing 4	0.0346334	0.373407	TF	zf-BED
Basal Cell	hypoTH	ENSDARG00000042829	si:dkey-30j22.1	si:dkey-30j22.1	0.0352704	0.477918
Basal Cell	hypoTH	ENSDARG00000013058	ascc2	activating signal cointegrator 1 complex subunit 2	0.0354285	0.529412	TF-cofactor	ASCC
Basal Cell	hypoTH	ENSDARG00000102076	spink2.1	serine peptidase inhibitor, Kazal type 2, tandem duplicate 1	0.035905	1.74597
Basal Cell	hypoTH	ENSDARG00000056410	fdx1	ferredoxin 1	0.0363836	0.341864
Basal Cell	hypoTH	ENSDARG00000020197	rpl5a	ribosomal protein L5a	0.0370178	0.185039
Basal Cell	hypoTH	ENSDARG00000101755	prkar1ab	protein kinase, cAMP-dependent, regulatory, type I, alpha (tissue specific extinguisher 1) b	0.0371757	0.530688
Basal Cell	hypoTH	ENSDARG00000074410	brip1	BRCA1 interacting protein C-terminal helicase 1	0.037647	0.500456	TF-cofactor	Others
Basal Cell	hypoTH	ENSDARG00000039987	hivep2a	human immunodeficiency virus type I enhancer binding protein 2a	0.0384432	0.13567	TF	zf-C2H2
Basal Cell	hypoTH	ENSDARG00000101127	map1lc3b	microtubule-associated protein 1 light chain 3 beta	0.0389189	0.365602
Basal Cell	hypoTH	ENSDARG00000063313	plbd1	phospholipase B domain containing 1	0.0390742	0.632523
Basal Cell	hypoTH	ENSDARG00000033296	gpr37b	G protein-coupled receptor 37b	0.039392	1.39142
Basal Cell	hypoTH	ENSDARG00000014165	ssr3	signal sequence receptor, gamma	0.0413084	0.491509
Basal Cell	hypoTH	ENSDARG00000068050	agbl4	ATP/GTP binding protein-like 4	0.0419436	0.787841
Basal Cell	hypoTH	ENSDARG00000074506	tmem94	transmembrane protein 94	0.0425813	0.297345
Basal Cell	hypoTH	ENSDARG00000087492	FO704810.1		0.0433735	0.468689
Basal Cell	hypoTH	ENSDARG00000100296	pja2	praja ring finger ubiquitin ligase 2	0.0444772	0.419616
Basal Cell	hypoTH	ENSDARG00000087229	exoc7	exocyst complex component 7	0.0447944	0.389348
Basal Cell	hypoTH	ENSDARG00000071403	oaz1a	ornithine decarboxylase antizyme 1a	0.0451115	0.439852
Basal Cell	hypoTH	ENSDARG00000052082	gabarapb	GABA(A) receptor-associated protein b	0.0457457	0.71993
Basal Cell	hypoTH	ENSDARG00000019345	mark3a	MAP/microtubule affinity-regulating kinase 3a	0.0465367	0.178464
Basal Cell	hypoTH	ENSDARG00000070846	dazap1	DAZ associated protein 1	0.0466937	0.536238
Basal Cell	hypoTH	ENSDARG00000077130	bcl10	BCL10 immune signaling adaptor	0.0466937	0.771059	TF-cofactor	BCL
Basal Cell	hypoTH	ENSDARG00000016889	eif3g	eukaryotic translation initiation factor 3, subunit G	0.0468448	0.473797
Basal Cell	hypoTH	ENSDARG00000071213	rgl3a	ral guanine nucleotide dissociation stimulator-like 3a	0.0468448	0.511252
Basal Cell	hypoTH	ENSDARG00000034056	csnk1g2b	casein kinase 1, gamma 2b	0.0477832	0.249053
Basal Cell	hypoTH	ENSDARG00000018688	elk3	ETS transcription factor ELK3	0.04794	0.303861	TF	ETS
Basal Cell	hypoTH	ENSDARG00000061940	htr4	5-hydroxytryptamine receptor 4	0.0490494	0.739733	Receptor
Basal Cell	hypoTH	ENSDARG00000105277	cnksr3	cnksr family member 3	0.0492061	0.166432
Basal Cell	hypoTH	ENSDARG00000103454	trpm6	transient receptor potential cation channel, subfamily M, member 6	0.0496822	0.191029
Basal Cell	hypoTH	ENSDARG00000005861	ralgapa2	Ral GTPase activating protein, alpha subunit 2 (catalytic)	0.0498389	0.139178
Basal Cell	WT	ENSDARG00000016404	ptch1	patched 1	0	-2.69214	Receptor
Basal Cell	WT	ENSDARG00000023868	si:dkey-172h23.2	si:dkey-172h23.2	0	-1.88433
Basal Cell	WT	ENSDARG00000029168	ppfibp2b	PPFIA binding protein 2b	0	-1.51667
Basal Cell	WT	ENSDARG00000031678	col5a2a	collagen, type V, alpha 2a	0	-1.56292	Ligand
Basal Cell	WT	ENSDARG00000031894	lef1	lymphoid enhancer-binding factor 1	0	-2.64839	TF	HMG
Basal Cell	WT	ENSDARG00000033437	rps6ka1	ribosomal protein S6 kinase a, polypeptide 1	0	-1.38965
Basal Cell	WT	ENSDARG00000040261	runx2a	RUNX family transcription factor 2a	0	-2.11394	TF	Runt
Basal Cell	WT	ENSDARG00000040917	cbfb	core-binding factor subunit beta	0	-1.66713	TF	CBF
Basal Cell	WT	ENSDARG00000043210	nfic	nuclear factor I/C	0	-1.24481	TF	CTF/NFI
Basal Cell	WT	ENSDARG00000043226	nfixa	nuclear factor I/Xa	0	-2.07228	TF	CTF/NFI
Basal Cell	WT	ENSDARG00000043806	postna	periostin, osteoblast specific factor a	0	-2.59426
Basal Cell	WT	ENSDARG00000044574	rbms3	RNA binding motif, single stranded interacting protein	0	-1.88087
Basal Cell	WT	ENSDARG00000052242	aff2	AF4/FMR2 family, member 2	0	-1.99801	TF	AF-4
Basal Cell	WT	ENSDARG00000053484	syne2b	spectrin repeat containing, nuclear envelope 2b	0	-1.64168
Basal Cell	WT	ENSDARG00000054619	fras1	Fraser extracellular matrix complex subunit 1	0	-1.75589
Basal Cell	WT	ENSDARG00000056530	cpamd8	C3 and PZP like alpha-2-macroglobulin domain containing 8	0	-1.55255
Basal Cell	WT	ENSDARG00000059960	plch2a	phospholipase C, eta 2a	0	-2.3979
Basal Cell	WT	ENSDARG00000061836	nfixb	nuclear factor I/Xb	0	-2.10768	TF	CTF/NFI
Basal Cell	WT	ENSDARG00000062510	bcl11ba	BAF chromatin remodeling complex subunit BCL11B a	0	-1.59825	TF	zf-C2H2
Basal Cell	WT	ENSDARG00000062579	kremen1	kringle containing transmembrane protein 1	0	-2.1514	Receptor
Basal Cell	WT	ENSDARG00000092638	ptprua	protein tyrosine phosphatase receptor type Ua	0	-2.23668	Receptor
Basal Cell	WT	ENSDARG00000098294	col5a3a	collagen, type V, alpha 3a	0	-3.61944	Ligand
Basal Cell	WT	ENSDARG00000103479	ptprfa	protein tyrosine phosphatase receptor type Fa	0	-1.60279	Receptor
Basal Cell	WT	ENSDARG00000034555	pard3bb	par-3 family cell polarity regulator beta b	2.46e-306	-0.740735
Basal Cell	WT	ENSDARG00000004246	slit2	slit homolog 2 (Drosophila)	4.99e-304	-1.71147	Ligand
Basal Cell	WT	ENSDARG00000059233	runx2b	RUNX family transcription factor 2b	4.44e-302	-2.37861	TF	Runt
Basal Cell	WT	ENSDARG00000026531	alcama	activated leukocyte cell adhesion molecule a	8.91e-298	-1.32326
Basal Cell	WT	ENSDARG00000092722	unc5da	unc-5 netrin receptor Da	1.34e-292	-2.28688	Receptor
Basal Cell	WT	ENSDARG00000003544	adarb1b	adenosine deaminase RNA specific B1b	8.26e-291	-1.16084
Basal Cell	WT	ENSDARG00000012593	col5a1	procollagen, type V, alpha 1	1.39e-284	-0.633311	Ligand
Basal Cell	WT	ENSDARG00000007231	ryk	receptor like tyrosine kinase	2.36e-282	-1.19755	Receptor
Basal Cell	WT	ENSDARG00000038672	tcf7	transcription factor 7	1.74e-267	-1.64574	TF	HMG
Basal Cell	WT	ENSDARG00000093799	setbp1	SET binding protein 1	4.63e-264	-1.55714	TF	Others
Basal Cell	WT	ENSDARG00000052826	runx3	RUNX family transcription factor 3	2.04e-246	-1.66037	TF	Runt
Basal Cell	WT	ENSDARG00000104100	bmpr1ba	bone morphogenetic protein receptor, type IBa	6.22e-246	-1.26048	Receptor
Basal Cell	WT	ENSDARG00000101081	ptprub	protein tyrosine phosphatase receptor type Ub	6.87e-241	-1.00498	Receptor
Basal Cell	WT	ENSDARG00000095533	si:ch211-198c19.3	si:ch211-198c19.3	2.49e-240	-2.76939
Basal Cell	WT	ENSDARG00000026519	ralgps2	Ral GEF with PH domain and SH3 binding motif 2	8.3e-237	-0.859471
Basal Cell	WT	ENSDARG00000069484	dab2ipa	DAB2 interacting protein a	3.82e-236	-1.42881
Basal Cell	WT	ENSDARG00000044074	loxl2b	lysyl oxidase-like 2b	6.2e-235	-2.0212	TF-cofactor	Others
Basal Cell	WT	ENSDARG00000010519	per3	period circadian clock 3	9.51e-234	-1.16765
Basal Cell	WT	ENSDARG00000040001	fryl	furry homolog, like	3.25e-226	-0.830699
Basal Cell	WT	ENSDARG00000040920	si:dkey-49n23.1	si:dkey-49n23.1	9.93e-225	-1.7887	Ligand
Basal Cell	WT	ENSDARG00000094704	bcl2a	BCL2 apoptosis regulator a	5.44e-221	-1.57448
Basal Cell	WT	ENSDARG00000016981	bcar3	BCAR3 adaptor protein, NSP family member	5.48e-212	-1.96222
Basal Cell	WT	ENSDARG00000062799	baiap2a	BAI1-associated protein 2a	1.58e-210	-0.393951
Basal Cell	WT	ENSDARG00000055373	sema3fb	sema domain, immunoglobulin domain (Ig), short basic domain, secreted, (semaphorin) 3Fb	1.63e-209	-1.12904	Ligand
Basal Cell	WT	ENSDARG00000105071	nos1apa	nitric oxide synthase 1 (neuronal) adaptor protein a	9.26e-204	-1.71922
Basal Cell	WT	ENSDARG00000018984	eya2	EYA transcriptional coactivator and phosphatase 2	7.28e-202	-0.995677
Basal Cell	WT	ENSDARG00000062573	znrf3	zinc and ring finger 3	1.16e-198	-0.827744	Receptor
Basal Cell	WT	ENSDARG00000069185	celsr1a	cadherin EGF LAG seven-pass G-type receptor 1a	2.98e-195	-0.71968
Basal Cell	WT	ENSDARG00000102464	wnt5b	wingless-type MMTV integration site family, member 5b	7.14e-194	-0.830006
Basal Cell	WT	ENSDARG00000075608	mical2a	microtubule associated monooxygenase, calponin and LIM domain containing 2a	2.13e-193	-0.782186
Basal Cell	WT	ENSDARG00000074201	flna	filamin A, alpha (actin binding protein 280)	3.32e-193	-0.532003
Basal Cell	WT	ENSDARG00000043010	camk2d1	calcium/calmodulin-dependent protein kinase (CaM kinase) II delta 1	8.7e-192	-1.12459
Basal Cell	WT	ENSDARG00000044132	ogna	osteoglycin, paralog a	5.75e-187	-1.97718
Basal Cell	WT	ENSDARG00000087688	klhl29	kelch-like family member 29	1.38e-185	-1.25622
Basal Cell	WT	ENSDARG00000018303	etv4	ets variant 4	1.38e-184	-1.44983	TF	ETS
Basal Cell	WT	ENSDARG00000069904	CABZ01071903.1		1.88e-184	-1.5887
Basal Cell	WT	ENSDARG00000021163	thrb	thyroid hormone receptor beta	4.73e-184	-1.58958	TF	THR-like
Basal Cell	WT	ENSDARG00000109820	NPAS3		1.61e-180	-1.19078	TF	bHLH
Basal Cell	WT	ENSDARG00000102478	ADAMTS7		2.24e-178	-2.13325
Basal Cell	WT	ENSDARG00000009194	col16a1	collagen, type XVI, alpha 1	6.93e-178	-0.946874
Basal Cell	WT	ENSDARG00000076657	plagl2	pleiomorphic adenoma gene-like 2	1.09e-175	-1.37015	TF	zf-C2H2
Basal Cell	WT	ENSDARG00000015891	ptprea	protein tyrosine phosphatase receptor type Ea	7.57e-175	-0.907494
Basal Cell	WT	ENSDARG00000026784	robo1	roundabout, axon guidance receptor, homolog 1 (Drosophila)	1.13e-174	-1.12826	Receptor
Basal Cell	WT	ENSDARG00000075468	vwa1	von Willebrand factor A domain containing 1	5.18e-173	-1.90529
Basal Cell	WT	ENSDARG00000068365	lmx1bb	LIM homeobox transcription factor 1, beta b	2.69e-171	-0.890883	TF	Homeobox
Basal Cell	WT	ENSDARG00000004635	epha7	eph receptor A7	1.05e-170	-1.10524	Receptor
Basal Cell	WT	ENSDARG00000103026	p3h2	prolyl 3-hydroxylase 2	2.54e-170	-1.84992
Basal Cell	WT	ENSDARG00000099979	tgfbr3	transforming growth factor, beta receptor III	1.84e-166	-0.65126	Receptor
Basal Cell	WT	ENSDARG00000069440	dachd	dachshund d	1.06e-165	-2.07994	TF	DACH
Basal Cell	WT	ENSDARG00000017953	tp73	tumor protein p73	3.2e-162	-0.72167	TF	P53
Basal Cell	WT	ENSDARG00000029668	crim1	cysteine rich transmembrane BMP regulator 1 (chordin-like)	1.1e-161	-0.571687
Basal Cell	WT	ENSDARG00000071879	tgfb5	transforming growth factor, beta 5	1.14e-159	-2.2637	Ligand
Basal Cell	WT	ENSDARG00000020080	ek1	eph-like kinase 1	2.39e-159	-3.15311	Receptor
Basal Cell	WT	ENSDARG00000005586	zbtb20	zinc finger and BTB domain containing 20	4.32e-159	-1.60558	TF	ZBTB
Basal Cell	WT	ENSDARG00000098215	BICD2		3.77e-158	-0.803343
Basal Cell	WT	ENSDARG00000101209	lamb1a	laminin, beta 1a	3.43e-155	-1.00124	Ligand
Basal Cell	WT	ENSDARG00000073684	quo	quattro	8.45e-155	-1.13997
Basal Cell	WT	ENSDARG00000098359	il17rd	interleukin 17 receptor D	5.27e-153	-0.940421
Basal Cell	WT	ENSDARG00000103774	limch1b	LIM and calponin homology domains 1b	6.33e-153	-1.31538
Basal Cell	WT	ENSDARG00000003872	ccdc102a	coiled-coil domain containing 102A	4.3e-151	-1.2734
Basal Cell	WT	ENSDARG00000037030	casz1	castor zinc finger 1	1.57e-149	-0.952166	TF	Others
Basal Cell	WT	ENSDARG00000087822	agap3	ArfGAP with GTPase domain, ankyrin repeat and PH domain 3	1.23e-148	-0.606438
Basal Cell	WT	ENSDARG00000036279	lamc1	laminin, gamma 1	3.01e-146	-0.668356	Ligand
Basal Cell	WT	ENSDARG00000062020	gse1	Gse1 coiled-coil protein	4.87e-146	-0.678733
Basal Cell	WT	ENSDARG00000075156	tbc1d4	TBC1 domain family, member 4	5.91e-146	-0.92702
Basal Cell	WT	ENSDARG00000073688	nav2a	neuron navigator 2a	3.62e-145	-1.40013
Basal Cell	WT	ENSDARG00000097959	si:dkey-248g15.3	si:dkey-248g15.3	2.76e-143	-1.22221
Basal Cell	WT	ENSDARG00000033950	lamb2l	laminin, beta 2-like	4.43e-143	-2.85541
Basal Cell	WT	ENSDARG00000032161	srgap2	SLIT-ROBO Rho GTPase activating protein 2	1.13e-142	-0.513725
Basal Cell	WT	ENSDARG00000015566	dnmt3ab	DNA (cytosine-5-)-methyltransferase 3 alpha b	4.66e-142	-0.816706
Basal Cell	WT	ENSDARG00000011797	tent5bb	terminal nucleotidyltransferase 5Bb	3.14e-141	-1.30157
Basal Cell	WT	ENSDARG00000025920	tiam1b	T cell lymphoma invasion and metastasis 1b	4.86e-140	-1.77393
Basal Cell	WT	ENSDARG00000011490	scube3	signal peptide, CUB domain, EGF-like 3	1.64e-138	-0.978676
Basal Cell	WT	ENSDARG00000079355	flrt2	fibronectin leucine rich transmembrane protein 2	6.39e-138	-1.37346
Basal Cell	WT	ENSDARG00000090624	ADGRL3		1.32e-137	-2.03573
Basal Cell	WT	ENSDARG00000076321	col28a2a	collagen, type XXVIII, alpha 2a	7.43e-137	-0.991093
Basal Cell	WT	ENSDARG00000074132	scpp7	secretory calcium-binding phosphoprotein 7	4.1e-136	-4.61109
Basal Cell	WT	ENSDARG00000022615	si:ch211-241e1.3	si:ch211-241e1.3	7.04e-136	-0.649272	Ligand
Basal Cell	WT	ENSDARG00000012896	anos1a	anosmin 1a	1.76e-135	-3.36244	Ligand
Basal Cell	WT	ENSDARG00000086645	hs3st3b1b	heparan sulfate (glucosamine) 3-O-sulfotransferase 3B1b	7.34e-134	-1.95977
Basal Cell	WT	ENSDARG00000060978	atp2a3	ATPase sarcoplasmic/endoplasmic reticulum Ca2+ transporting 3	9.4e-133	-1.06949
Basal Cell	WT	ENSDARG00000077465	sorcs2	sortilin-related VPS10 domain containing receptor 2	3.52e-131	-1.98441
Basal Cell	WT	ENSDARG00000007461	srgap1a	SLIT-ROBO Rho GTPase activating protein 1a	5.62e-131	-0.828061
Basal Cell	WT	ENSDARG00000009978	icn	ictacalcin	3.08e-128	-1.03078
Basal Cell	WT	ENSDARG00000076229	mrtfab	myocardin related transcription factor Ab	4.73e-127	-0.539613	TF-cofactor	Others
Basal Cell	WT	ENSDARG00000102829	cobll1b	cordon-bleu WH2 repeat protein-like 1b	2.51e-126	-0.741134
Basal Cell	WT	ENSDARG00000016153	dag1	dystroglycan 1	8.2e-123	-0.73868
Basal Cell	WT	ENSDARG00000017591	fat1a	FAT atypical cadherin 1a	1.44e-122	-0.642294
Basal Cell	WT	ENSDARG00000061231	tinagl1	tubulointerstitial nephritis antigen-like 1	3.32e-122	-1.43734
Basal Cell	WT	ENSDARG00000070141	si:ch211-191i18.2	si:ch211-191i18.2	4.95e-117	-2.71406
Basal Cell	WT	ENSDARG00000086778	pdgfba	platelet-derived growth factor beta polypeptide a	6.08e-117	-1.65906	Ligand
Basal Cell	WT	ENSDARG00000014891	robo2	roundabout, axon guidance receptor, homolog 2 (Drosophila)	6.12e-117	-2.13472	Receptor
Basal Cell	WT	ENSDARG00000098203	APCDD1		8.7e-114	-2.88885	Receptor
Basal Cell	WT	ENSDARG00000001999	adamts18	ADAM metallopeptidase with thrombospondin type 1 motif, 18	1.04e-113	-1.55182
Basal Cell	WT	ENSDARG00000043818	si:ch211-119c20.2	si:ch211-119c20.2	1.66e-113	-0.640751
Basal Cell	WT	ENSDARG00000102142	ece2b	endothelin converting enzyme 2b	3.68e-112	-1.33076
Basal Cell	WT	ENSDARG00000098766	pcxa	pyruvate carboxylase a	8.64e-111	-0.800624
Basal Cell	WT	ENSDARG00000075625	lrig1	leucine-rich repeats and immunoglobulin-like domains 1	1.24e-110	-0.669094
Basal Cell	WT	ENSDARG00000099672	capgb	capping protein (actin filament), gelsolin-like b	1.45e-109	-1.05717
Basal Cell	WT	ENSDARG00000102911	iffo2b	intermediate filament family orphan 2b	7.04e-109	-1.53064
Basal Cell	WT	ENSDARG00000003142	dachc	dachshund c	9.79e-109	-2.99996	TF	DACH
Basal Cell	WT	ENSDARG00000056029	cyp26c1	cytochrome P450, family 26, subfamily C, polypeptide 1	5.94e-108	-2.4609
Basal Cell	WT	ENSDARG00000011027	fgfr1a	fibroblast growth factor receptor 1a	1.75e-107	-0.71282	Receptor
Basal Cell	WT	ENSDARG00000075555	adamts17	ADAM metallopeptidase with thrombospondin type 1 motif, 17	1.91e-106	-0.853077
Basal Cell	WT	ENSDARG00000016311	dock9b	dedicator of cytokinesis 9b	1.98e-106	-1.45953
Basal Cell	WT	ENSDARG00000101244	gli1	GLI family zinc finger 1	9.9e-106	-1.48505	TF	zf-C2H2
Basal Cell	WT	ENSDARG00000023484	rflna	refilin A	2.28e-103	-1.04472
Basal Cell	WT	ENSDARG00000079011	col17a1b	collagen, type XVII, alpha 1b	1.01e-102	-0.44727	Receptor
Basal Cell	WT	ENSDARG00000093413	edil3a	EGF-like repeats and discoidin I-like domains 3a	7.47e-102	-1.19904	Ligand
Basal Cell	WT	ENSDARG00000020057	bmpr2b	bone morphogenetic protein receptor, type II b (serine/threonine kinase)	1.05e-101	-0.680535	Receptor
Basal Cell	WT	ENSDARG00000014246	jag2a	jagged canonical Notch ligand 2a	1.43e-101	-0.863379	Ligand
Basal Cell	WT	ENSDARG00000022518	pex5la	peroxisomal biogenesis factor 5-like a	1.83e-101	-1.82272
Basal Cell	WT	ENSDARG00000036840	krt15	keratin 15	4.54e-101	-1.61187
Basal Cell	WT	ENSDARG00000039576	fstl1b	follistatin-like 1b	5.65e-101	-0.816505
Basal Cell	WT	ENSDARG00000078866	sdk1a	sidekick cell adhesion molecule 1a	6.01e-100	-1.26431
Basal Cell	WT	ENSDARG00000060678	ndst2b	N-deacetylase/N-sulfotransferase (heparan glucosaminyl) 2b	2.58e-98	-1.16319
Basal Cell	WT	ENSDARG00000001975	hsd11b2	hydroxysteroid (11-beta) dehydrogenase 2	8.39e-98	-2.23924
Basal Cell	WT	ENSDARG00000034559	srpx2	sushi-repeat containing protein X-linked 2	2.86e-96	-3.4212
Basal Cell	WT	ENSDARG00000105184	nbeab	neurobeachin b	3.16e-94	-2.09436
Basal Cell	WT	ENSDARG00000059362	cavin1b	caveolae associated protein 1b	1.77e-93	-0.766519	TF-cofactor	Others
Basal Cell	WT	ENSDARG00000104701	map7d1b	MAP7 domain containing 1b	2.17e-93	-1.03108
Basal Cell	WT	ENSDARG00000097055	si:ch211-284f22.3	si:ch211-284f22.3	1.02e-92	-0.840839
Basal Cell	WT	ENSDARG00000038151	zgc:92360	zgc:92360	2.39e-92	-1.04822
Basal Cell	WT	ENSDARG00000034434	igf1rb	insulin-like growth factor 1b receptor	2.86e-92	-0.540417	Receptor
Basal Cell	WT	ENSDARG00000031845	mboat2a	membrane bound O-acyltransferase domain containing 2a	5.93e-92	-0.633492
Basal Cell	WT	ENSDARG00000104295	arhgap21a	Rho GTPase activating protein 21a	8.75e-92	-1.07423
Basal Cell	WT	ENSDARG00000009689	daam1b	dishevelled associated activator of morphogenesis 1b	7.85e-91	-0.607841
Basal Cell	WT	ENSDARG00000004672	ptk2ab	protein tyrosine kinase 2ab	9.49e-91	-0.551747
Basal Cell	WT	ENSDARG00000074381	farp1	FERM, RhoGEF (ARHGEF) and pleckstrin domain protein 1 (chondrocyte-derived)	5.27e-90	-1.07957
Basal Cell	WT	ENSDARG00000070681	c1qtnf12	C1q and TNF related 12	1.39e-89	-1.95697
Basal Cell	WT	ENSDARG00000076564	hspg2	heparan sulfate proteoglycan 2	3.31e-89	-0.543581	Ligand
Basal Cell	WT	ENSDARG00000042151	skia	v-ski avian sarcoma viral oncogene homolog a	1.32e-88	-0.463986	TF-cofactor	SKI
Basal Cell	WT	ENSDARG00000104315	fhl3b	four and a half LIM domains 3b	3.42e-88	-1.67821
Basal Cell	WT	ENSDARG00000004115	mgat4b	alpha-1,3-mannosyl-glycoprotein 4-beta-N-acetylglucosaminyltransferase B	1.37e-87	-1.30001
Basal Cell	WT	ENSDARG00000069199	zgc:172120	zgc:172120	2.73e-87	-1.1461
Basal Cell	WT	ENSDARG00000097017	mical3a	microtubule associated monooxygenase, calponin and LIM domain containing 3a	1.23e-85	-0.703785
Basal Cell	WT	ENSDARG00000025299	tspan9a	tetraspanin 9a	1.34e-84	-0.460276
Basal Cell	WT	ENSDARG00000010767	epha4l	eph receptor A4, like	5.45e-83	-1.62508	Receptor
Basal Cell	WT	ENSDARG00000060309	srgap3	SLIT-ROBO Rho GTPase activating protein 3	1.02e-82	-0.620397
Basal Cell	WT	ENSDARG00000110019	CABZ01079267.1		1.73e-82	-1.13079
Basal Cell	WT	ENSDARG00000058003	wfdc1	WAP four-disulfide core domain 1	1.97e-82	-2.50023
Basal Cell	WT	ENSDARG00000079378	phldb1b	pleckstrin homology-like domain, family B, member 1b	3.61e-82	-0.578684
Basal Cell	WT	ENSDARG00000078888	iqgap1	IQ motif containing GTPase activating protein 1	1.2e-81	-0.608464
Basal Cell	WT	ENSDARG00000057737	rxraa	retinoid X receptor, alpha a	1.82e-81	-0.644079	TF	RXR-like
Basal Cell	WT	ENSDARG00000069940	ppap2d	phosphatidic acid phosphatase type 2D	2.44e-81	-0.501077
Basal Cell	WT	ENSDARG00000039117	tefa	TEF transcription factor, PAR bZIP family member a	4.27e-81	-1.43261	TF	TF_bZIP
Basal Cell	WT	ENSDARG00000079994	akap13	A-kinase anchoring protein 13	6.22e-81	-0.710469
Basal Cell	WT	ENSDARG00000032990	plxnb3	plexin B3	9.64e-81	-1.02246	Receptor
Basal Cell	WT	ENSDARG00000062489	2023-03-08	membrane-associated ring finger (C3HC4) 8	6.74e-80	-0.428824
Basal Cell	WT	ENSDARG00000078915	mmp17a	matrix metallopeptidase 17a	8.32e-80	-1.9352
Basal Cell	WT	ENSDARG00000102701	eva1ba	eva-1 homolog Ba (C. elegans)	9.15e-80	-1.18467
Basal Cell	WT	ENSDARG00000058953	abcc4	ATP-binding cassette, sub-family C (CFTR/MRP), member 4	3.66e-79	-0.881457
Basal Cell	WT	ENSDARG00000045580	lum	lumican	5.54e-79	-1.09698
Basal Cell	WT	ENSDARG00000045006	ptprga	protein tyrosine phosphatase receptor type Ga	2.22e-78	-0.483351	Receptor
Basal Cell	WT	ENSDARG00000063001	atp8a1	ATPase phospholipid transporting 8A1	2.23e-78	-1.26107
Basal Cell	WT	ENSDARG00000110878	si:dkey-28k24.2	si:dkey-28k24.2	2.23e-78	-1.70172
Basal Cell	WT	ENSDARG00000071304	tbc1d2	TBC1 domain family, member 2	2.42e-77	-1.32396
Basal Cell	WT	ENSDARG00000079097	tanc2a	tetratricopeptide repeat, ankyrin repeat and coiled-coil containing 2a	2.42e-77	-0.558264
Basal Cell	WT	ENSDARG00000077749	usp54b	ubiquitin specific peptidase 54b	9.1e-77	-1.2642
Basal Cell	WT	ENSDARG00000087641	cdh26.2	cadherin 26, tandem duplicate 2	1.65e-76	-1.49494
Basal Cell	WT	ENSDARG00000020893	slc25a55a	solute carrier family 25 member 55a	4.8e-75	-0.911709
Basal Cell	WT	ENSDARG00000086853	dpyda.3	dihydropyrimidine dehydrogenase a, tandem duplicate 3	4.82e-75	-1.87603
Basal Cell	WT	ENSDARG00000093052	c6	complement component 6	9.46e-75	-2.061
Basal Cell	WT	ENSDARG00000059801	pdzd2	PDZ domain containing 2	1.21e-74	-0.808235
Basal Cell	WT	ENSDARG00000069795	zgc:154058	zgc:154058	1.67e-74	-0.669563
Basal Cell	WT	ENSDARG00000007369	tcf7l1b	transcription factor 7 like 1b	1.78e-74	-0.690175	TF	HMG
Basal Cell	WT	ENSDARG00000055026	ptch2	patched 2	2.4e-74	-2.75273	Receptor
Basal Cell	WT	ENSDARG00000056525	bcar1	BCAR1 scaffold protein, Cas family member	2.57e-74	-0.459081
Basal Cell	WT	ENSDARG00000002758	dedd1	death effector domain-containing 1	2.79e-74	-0.531758
Basal Cell	WT	ENSDARG00000003512	anks1b	ankyrin repeat and sterile alpha motif domain containing 1B	4.03e-74	-0.783656
Basal Cell	WT	ENSDARG00000063563	creb3l2	cAMP responsive element binding protein 3-like 2	1.63e-73	-0.470203	TF	TF_bZIP
Basal Cell	WT	ENSDARG00000024619	foxo6b	forkhead box O6 b	7.29e-73	-1.82799	TF	Fork_head
Basal Cell	WT	ENSDARG00000056780	ssh1a	slingshot protein phosphatase 1a	1.68e-72	-1.31439
Basal Cell	WT	ENSDARG00000116556	im:7142702	im:7142702	2.92e-72	-0.500536	TF	zf-C2H2
Basal Cell	WT	ENSDARG00000070536	creb5b	cAMP responsive element binding protein 5b	3.84e-72	-0.836246	TF	TF_bZIP
Basal Cell	WT	ENSDARG00000069469	khdrbs2	KH domain containing, RNA binding, signal transduction associated 2	3.21e-71	-2.52644
Basal Cell	WT	ENSDARG00000019341	gpc1a	glypican 1a	6.56e-71	-2.2438	Receptor
Basal Cell	WT	ENSDARG00000017004	myo10	myosin X	2.15e-69	-0.837058
Basal Cell	WT	ENSDARG00000036571	sema3e	sema domain, immunoglobulin domain (Ig), short basic domain, secreted, (semaphorin) 3E	2.19e-69	-1.21468	Ligand
Basal Cell	WT	ENSDARG00000058237	ssbp3a	single stranded DNA binding protein 3a	3.6e-69	-0.669834
Basal Cell	WT	ENSDARG00000105045	bmpr1ab	bone morphogenetic protein receptor, type IAb	4.55e-69	-0.587427	Receptor
Basal Cell	WT	ENSDARG00000024365	crlf1a	cytokine receptor-like factor 1a	2.55e-68	-1.53098
Basal Cell	WT	ENSDARG00000015472	gpc4	glypican 4	6.05e-68	-0.72798	Receptor
Basal Cell	WT	ENSDARG00000041098	barx2	BARX homeobox 2	6.57e-68	-1.3688	TF	Homeobox
Basal Cell	WT	ENSDARG00000058543	lama5	laminin, alpha 5	7.96e-68	-0.502119	Ligand
Basal Cell	WT	ENSDARG00000061736	ank3a	ankyrin 3a	1.04e-67	-1.13507
Basal Cell	WT	ENSDARG00000051836	si:dkeyp-19e1.3	si:dkeyp-19e1.3	1.05e-67	-0.706159
Basal Cell	WT	ENSDARG00000011163	sema3fa	sema domain, immunoglobulin domain (Ig), short basic domain, secreted, (semaphorin) 3Fa	1.53e-67	-0.54548	Ligand
Basal Cell	WT	ENSDARG00000079317	dlc1	DLC1 Rho GTPase activating protein	2.75e-67	-1.22
Basal Cell	WT	ENSDARG00000099840	lpar1	lysophosphatidic acid receptor 1	6.63e-67	-0.920339
Basal Cell	WT	ENSDARG00000069594	kif13a	kinesin family member 13A	6.81e-67	-1.17056
Basal Cell	WT	ENSDARG00000042172	c7a	complement component 7a	9.08e-67	-1.38767
Basal Cell	WT	ENSDARG00000077580	tspeara	thrombospondin-type laminin G domain and EAR repeats a	1.48e-66	-3.12506
Basal Cell	WT	ENSDARG00000075851	oafa	OAF homolog a (Drosophila)	2.06e-66	-1.56212
Basal Cell	WT	ENSDARG00000095022	thsd7ba	thrombospondin, type I, domain containing 7Ba	2.3e-66	-2.70492
Basal Cell	WT	ENSDARG00000090338	fam20cb	FAM20C golgi associated secretory pathway kinase b	7.02e-66	-0.648503
Basal Cell	WT	ENSDARG00000062621	satb1b	SATB homeobox 1b	1.04e-65	-1.22182	TF	CUT
Basal Cell	WT	ENSDARG00000009610	rgs12a	regulator of G protein signaling 12a	4.04e-65	-0.804743
Basal Cell	WT	ENSDARG00000075557	apcdd1l	adenomatosis polyposis coli down-regulated 1-like	8.59e-65	-2.73614
Basal Cell	WT	ENSDARG00000016084	spsb4a	splA/ryanodine receptor domain and SOCS box containing 4a	1.29e-64	-0.895243
Basal Cell	WT	ENSDARG00000026499	ppm1e	protein phosphatase, Mg2+/Mn2+ dependent, 1E	1.89e-64	-1.33099
Basal Cell	WT	ENSDARG00000075817	mettl24	methyltransferase like 24	1.98e-64	-1.54068
Basal Cell	WT	ENSDARG00000026865	fam107b	family with sequence similarity 107 member B	2e-64	-0.578083
Basal Cell	WT	ENSDARG00000028661	cntfr	ciliary neurotrophic factor receptor	2e-64	-0.951616
Basal Cell	WT	ENSDARG00000115101	LHFPL6		2.71e-64	-0.901458
Basal Cell	WT	ENSDARG00000001968	dock5	dedicator of cytokinesis 5	1.14e-63	-0.33255
Basal Cell	WT	ENSDARG00000044356	tp63	tumor protein p63	1.81e-63	-0.288398	TF	P53
Basal Cell	WT	ENSDARG00000015059	daam1a	dishevelled associated activator of morphogenesis 1a	2.49e-63	-0.411489
Basal Cell	WT	ENSDARG00000087863	cd44a	CD44 molecule (Indian blood group) a	3.66e-63	-1.13867	Receptor
Basal Cell	WT	ENSDARG00000042840	eml1	EMAP like 1	1.28e-62	-1.24543
Basal Cell	WT	ENSDARG00000037362	scube2	signal peptide, CUB domain, EGF-like 2	2.34e-62	-3.21135
Basal Cell	WT	ENSDARG00000079486	fam20a	FAM20A golgi associated secretory pathway pseudokinase	2.69e-62	-3.15746
Basal Cell	WT	ENSDARG00000075964	plekhg4	pleckstrin homology domain containing, family G (with RhoGef domain) member 4	3.16e-62	-0.400668
Basal Cell	WT	ENSDARG00000031763	smad6b	SMAD family member 6b	9.51e-62	-0.834646	TF	MH1
Basal Cell	WT	ENSDARG00000110877	FO834855.1		1.24e-61	-3.03547
Basal Cell	WT	ENSDARG00000053713	ccdc88c	coiled-coil domain containing 88C	1.81e-61	-0.596727
Basal Cell	WT	ENSDARG00000030107	si:ch211-207i1.2	si:ch211-207i1.2	1.96e-61	-0.35094
Basal Cell	WT	ENSDARG00000055493	hic1	hypermethylated in cancer 1	4.15e-61	-2.6213	TF	ZBTB
Basal Cell	WT	ENSDARG00000027903	adamtsl3	ADAMTS-like 3	5.86e-60	-1.0554
Basal Cell	WT	ENSDARG00000098438	slc6a6b	solute carrier family 6 member 6b	2.54e-59	-1.63417
Basal Cell	WT	ENSDARG00000061600	cemip2	cell migration inducing hyaluronidase 2	3.12e-59	-1.19489
Basal Cell	WT	ENSDARG00000059483	tead1b	TEA domain family member 1b	4.26e-59	-0.849307	TF	TEA
Basal Cell	WT	ENSDARG00000078599	micu3a	mitochondrial calcium uptake family, member 3a	5.3e-59	-1.83397
Basal Cell	WT	ENSDARG00000029472	afdna	afadin, adherens junction formation factor a	5.69e-59	-0.368788	Ligand
Basal Cell	WT	ENSDARG00000012066	dcn	decorin	6.96e-59	-0.480732	Ligand
Basal Cell	WT	ENSDARG00000002483	wnt7ab	wingless-type MMTV integration site family, member 7Ab	1.47e-58	-0.673664	Ligand
Basal Cell	WT	ENSDARG00000068374	si:ch211-132b12.7	si:ch211-132b12.7	2.11e-58	-1.04226
Basal Cell	WT	ENSDARG00000021432	odf3l2b	outer dense fiber of sperm tails 3-like 2b	2.15e-58	-1.97668
Basal Cell	WT	ENSDARG00000012499	per1b	period circadian clock 1b	3.86e-58	-1.22427
Basal Cell	WT	ENSDARG00000079388	agrn	agrin	1.16e-57	-0.243327	Ligand
Basal Cell	WT	ENSDARG00000023472	ctnnb2	catenin, beta 2	1.23e-57	-0.684001
Basal Cell	WT	ENSDARG00000090752	plk2a	polo-like kinase 2a (Drosophila)	1.32e-57	-1.351
Basal Cell	WT	ENSDARG00000012824	itga3b	integrin, alpha 3b	2.91e-57	-0.637397	Receptor
Basal Cell	WT	ENSDARG00000045066	entpd1	ectonucleoside triphosphate diphosphohydrolase 1	3.08e-57	-1.15561
Basal Cell	WT	ENSDARG00000089790	efna5a	ephrin-A5a	6.3e-57	-0.747797	Ligand
Basal Cell	WT	ENSDARG00000019367	tgfb3	transforming growth factor, beta 3	1.14e-56	-1.01047	Ligand
Basal Cell	WT	ENSDARG00000074599	frmd4ba	FERM domain containing 4Ba	1.71e-56	-0.600861
Basal Cell	WT	ENSDARG00000051768	fhod1	formin homology 2 domain containing 1	1.71e-56	-0.843146
Basal Cell	WT	ENSDARG00000055759	efhd2	EF-hand domain family, member D2	2.09e-56	-0.502177
Basal Cell	WT	ENSDARG00000069473	frem1a	Fras1 related extracellular matrix 1a	2.41e-56	-2.45226
Basal Cell	WT	ENSDARG00000077353	rerea	arginine-glutamic acid dipeptide (RE) repeats a	3.04e-56	-0.607657	TF	zf-GATA
Basal Cell	WT	ENSDARG00000004745	lmbr1l	limb development membrane protein 1-like	4.45e-56	-1.01283
Basal Cell	WT	ENSDARG00000031891	tbx1	T-box 1	8.11e-56	-2.62629	TF	T-box
Basal Cell	WT	ENSDARG00000059610	gpr146	G protein-coupled receptor 146	1.11e-55	-0.900306
Basal Cell	WT	ENSDARG00000055592	capn2b	calpain 2, (m/II) large subunit b	1.61e-55	-0.673685
Basal Cell	WT	ENSDARG00000058248	si:dkeyp-77h1.4	si:dkeyp-77h1.4	2.14e-55	-2.2569
Basal Cell	WT	ENSDARG00000015053	grip1	glutamate receptor interacting protein 1	2.18e-55	-1.00903	TF-cofactor	Others
Basal Cell	WT	ENSDARG00000052917	si:ch211-202f3.3	si:ch211-202f3.3	2.79e-55	-2.23117
Basal Cell	WT	ENSDARG00000037517	slc35c2	solute carrier family 35 member C2	5.09e-55	-0.691392
Basal Cell	WT	ENSDARG00000018508	zdhhc8b	zinc finger, DHHC-type containing 8b	1.59e-54	-0.798309
Basal Cell	WT	ENSDARG00000073917	b3glcta	beta 3-glucosyltransferase a	3.26e-54	-0.792273
Basal Cell	WT	ENSDARG00000115610	ccl25a	chemokine (C-C motif) ligand 25a	5.29e-53	-1.33565
Basal Cell	WT	ENSDARG00000104574	pcsk6	proprotein convertase subtilisin/kexin type 6	5.51e-53	-0.681567
Basal Cell	WT	ENSDARG00000060127	adamts3	ADAM metallopeptidase with thrombospondin type 1 motif, 3	1.66e-52	-1.6928
Basal Cell	WT	ENSDARG00000089767	rnf130	ring finger protein 130	1.99e-52	-0.732048
Basal Cell	WT	ENSDARG00000034541	tgfbr2b	transforming growth factor beta receptor 2b	2.2e-52	-0.543337	Receptor
Basal Cell	WT	ENSDARG00000006754	mllt3	MLLT3 super elongation complex subunit	3.33e-52	-1.05972
Basal Cell	WT	ENSDARG00000020957	pth1ra	parathyroid hormone 1 receptor a	3.33e-52	-1.10308	Receptor
Basal Cell	WT	ENSDARG00000073935	wnt6b	wingless-type MMTV integration site family, member 6b	4.13e-52	-0.854713	Ligand
Basal Cell	WT	ENSDARG00000103361	tshz3b	teashirt zinc finger homeobox 3b	7.13e-52	-0.969199	TF	zf-C2H2
Basal Cell	WT	ENSDARG00000054753	col10a1a	collagen, type X, alpha 1a	1.38e-51	-2.41851
Basal Cell	WT	ENSDARG00000038010	rac2	Rac family small GTPase 2	1.45e-51	-0.489239
Basal Cell	WT	ENSDARG00000074806	afap1l2	actin filament associated protein 1-like 2	2.92e-51	-1.61494
Basal Cell	WT	ENSDARG00000059948	si:dkey-121b10.7	si:dkey-121b10.7	1.08e-50	-2.20323
Basal Cell	WT	ENSDARG00000076856	frem2a	FRAS1 related extracellular matrix 2a	1.64e-50	-1.5236
Basal Cell	WT	ENSDARG00000063126	gusb	glucuronidase, beta	2.79e-50	-0.824412
Basal Cell	WT	ENSDARG00000035398	enc1	ectodermal-neural cortex 1	3.01e-50	-1.45407
Basal Cell	WT	ENSDARG00000038938	itprid2	ITPR interacting domain containing 2	7.6e-50	-0.37882
Basal Cell	WT	ENSDARG00000038306	tsc22d1	TSC22 domain family, member 1	1.71e-49	-0.602107	TF	TSC22
Basal Cell	WT	ENSDARG00000058969	cntnap2a	contactin associated protein like 2a	2.03e-49	-1.92247	Receptor
Basal Cell	WT	ENSDARG00000074082	gpc5c	glypican 5c	5.04e-49	-1.34085
Basal Cell	WT	ENSDARG00000087873	eevs	2-epi-5-epi-valiolone synthase	5.22e-49	-0.850009
Basal Cell	WT	ENSDARG00000062801	erfl3	Ets2 repressor factor like 3	7.97e-49	-0.508239	TF	ETS
Basal Cell	WT	ENSDARG00000057029	htr2aa	5-hydroxytryptamine (serotonin) receptor 2A, genome duplicate a	1.37e-48	-0.876053	Receptor
Basal Cell	WT	ENSDARG00000016531	klhl4	kelch-like family member 4	2.06e-48	-1.02052
Basal Cell	WT	ENSDARG00000017128	myofl	myoferlin like	1.38e-47	-0.455242
Basal Cell	WT	ENSDARG00000114495	ATP8A1		2.08e-47	-0.956581
Basal Cell	WT	ENSDARG00000061699	sipa1l3	signal-induced proliferation-associated 1 like 3	2.39e-47	-0.381888
Basal Cell	WT	ENSDARG00000089235	tspearb	thrombospondin-type laminin G domain and EAR repeats b	4.51e-47	-3.52244
Basal Cell	WT	ENSDARG00000015252	st3gal3b	ST3 beta-galactoside alpha-2,3-sialyltransferase 3b	1.22e-46	-0.743769
Basal Cell	WT	ENSDARG00000042874	phlda2	pleckstrin homology-like domain, family A, member 2	1.5e-46	-1.38089
Basal Cell	WT	ENSDARG00000074317	fam20ca	FAM20C golgi associated secretory pathway kinase a	1.84e-46	-2.30859
Basal Cell	WT	ENSDARG00000100725	ephb4a	eph receptor B4a	2.25e-46	-0.807002	Receptor
Basal Cell	WT	ENSDARG00000058822	wnt3a	wingless-type MMTV integration site family, member 3A	2.52e-46	-0.681699	Ligand
Basal Cell	WT	ENSDARG00000059333	si:ch211-285f17.1	si:ch211-285f17.1	4.75e-46	-0.211579
Basal Cell	WT	ENSDARG00000000002	ccdc80	coiled-coil domain containing 80	6.08e-46	-1.54575
Basal Cell	WT	ENSDARG00000062338	zeb2a	zinc finger E-box binding homeobox 2a	1.01e-45	-0.9918	TF	zf-C2H2
Basal Cell	WT	ENSDARG00000061446	smap2	small ArfGAP2	1.36e-45	-1.73143
Basal Cell	WT	ENSDARG00000089795	sertad4	SERTA domain containing 4	1.84e-45	-0.598235
Basal Cell	WT	ENSDARG00000075100	neo1b	neogenin 1b	8.17e-45	-0.982339	Receptor
Basal Cell	WT	ENSDARG00000004363	lhfpl6	LHFPL tetraspan subfamily member 6	1.54e-44	-0.788582
Basal Cell	WT	ENSDARG00000076595	sema4ga	sema domain, immunoglobulin domain (Ig), transmembrane domain (TM) and short cytoplasmic domain, (semaphorin) 4Ga	2.15e-44	-0.577293	Ligand
Basal Cell	WT	ENSDARG00000078416	zeb2b	zinc finger E-box binding homeobox 2b	2.37e-44	-1.4385	TF	zf-C2H2
Basal Cell	WT	ENSDARG00000031136	moxd1	monooxygenase, DBH-like 1	3.89e-44	-1.28404
Basal Cell	WT	ENSDARG00000016718	mmp11b	matrix metallopeptidase 11b	4.48e-44	-1.73493
Basal Cell	WT	ENSDARG00000060415	arhgef28a	Rho guanine nucleotide exchange factor (GEF) 28a	6.78e-44	-1.58112
Basal Cell	WT	ENSDARG00000078366	robo2	roundabout, axon guidance receptor, homolog 2 (Drosophila)	7.06e-44	-2.69803	Receptor
Basal Cell	WT	ENSDARG00000027611	cavin2a	caveolae associated protein 2a	1.68e-43	-0.629308
Basal Cell	WT	ENSDARG00000010408	igsf9b	immunoglobulin superfamily, member 9b	1.91e-43	-1.26473
Basal Cell	WT	ENSDARG00000044015	gfra2b	GDNF family receptor alpha 2b	2.46e-43	-3.5663	Receptor
Basal Cell	WT	ENSDARG00000098733	pxdn	peroxidasin	9.18e-43	-0.812914
Basal Cell	WT	ENSDARG00000054060	pof1b	POF1B actin binding protein	1.26e-42	-0.289718
Basal Cell	WT	ENSDARG00000045958	egfl6	EGF-like-domain, multiple 6	3.68e-42	-1.11285
Basal Cell	WT	ENSDARG00000034893	rarab	retinoic acid receptor, alpha b	5.02e-42	-0.536003	TF	THR-like
Basal Cell	WT	ENSDARG00000114920	TTC28		7.85e-42	-0.657497
Basal Cell	WT	ENSDARG00000037429	tll1	tolloid-like 1	1.57e-41	-1.53445
Basal Cell	WT	ENSDARG00000068431	si:ch211-195h23.3	si:ch211-195h23.3	1.89e-41	-0.941954
Basal Cell	WT	ENSDARG00000045694	prickle1b	prickle homolog 1b	2.05e-41	-0.832899
Basal Cell	WT	ENSDARG00000074307	rapgef5b	Rap guanine nucleotide exchange factor (GEF) 5b	2.11e-41	-1.55704
Basal Cell	WT	ENSDARG00000034503	per2	period circadian clock 2	2.39e-41	-0.400729	TF-cofactor	Others
Basal Cell	WT	ENSDARG00000104992	epgn	epithelial mitogen homolog (mouse)	4e-41	-0.902495	Ligand
Basal Cell	WT	ENSDARG00000090883	gabra3	gamma-aminobutyric acid (GABA) A receptor, alpha 3	2.5e-40	-2.28657
Basal Cell	WT	ENSDARG00000079201	tshz2	teashirt zinc finger homeobox 2	2.7e-40	-0.384593	TF	zf-C2H2
Basal Cell	WT	ENSDARG00000027423	igf1ra	insulin-like growth factor 1a receptor	2.75e-40	-0.329333	Receptor
Basal Cell	WT	ENSDARG00000071395	camk2g1	calcium/calmodulin-dependent protein kinase (CaM kinase) II gamma 1	3.18e-40	-0.412724
Basal Cell	WT	ENSDARG00000014003	stard8	StAR-related lipid transfer (START) domain containing 8	3.59e-40	-0.936347
Basal Cell	WT	ENSDARG00000056228	pld1a	phospholipase D1a	4.33e-40	-0.419351
Basal Cell	WT	ENSDARG00000063580	ppp1r9ala	protein phosphatase 1 regulatory subunit 9A-like A	4.62e-40	-0.702583
Basal Cell	WT	ENSDARG00000102403	cry2	cryptochrome circadian regulator 2	6.8e-40	-1.29955
Basal Cell	WT	ENSDARG00000025348	igfbp5b	insulin-like growth factor binding protein 5b	7.91e-40	-0.593941
Basal Cell	WT	ENSDARG00000007179	sash1a	SAM and SH3 domain containing 1a	1.03e-39	-0.5997
Basal Cell	WT	ENSDARG00000057166	lrmda	leucine rich melanocyte differentiation associated	1.11e-39	-0.417697
Basal Cell	WT	ENSDARG00000044902	atp2b4	ATPase plasma membrane Ca2+ transporting 4	1.16e-39	-0.31719
Basal Cell	WT	ENSDARG00000067976	ar	androgen receptor	1.31e-39	-0.567288	TF	ESR-like
Basal Cell	WT	ENSDARG00000038121	si:ch211-13k12.2	si:ch211-13k12.2	3.42e-39	-0.423183
Basal Cell	WT	ENSDARG00000017354	epha2a	eph receptor A2 a	3.84e-39	-1.40323	Receptor
Basal Cell	WT	ENSDARG00000035514	adam28	ADAM metallopeptidase domain 28	4.12e-39	-0.43434
Basal Cell	WT	ENSDARG00000044417	disp1	dispatched homolog 1 (Drosophila)	4.58e-39	-0.704929
Basal Cell	WT	ENSDARG00000077818	nrg2a	neuregulin 2a	5.13e-39	-0.283908	Ligand
Basal Cell	WT	ENSDARG00000078459	cux1a	cut-like homeobox 1a	5.63e-39	-0.384899	TF	CUT
Basal Cell	WT	ENSDARG00000041982	adamts6	ADAM metallopeptidase with thrombospondin type 1 motif, 6	7.72e-39	-1.10612
Basal Cell	WT	ENSDARG00000069216	c6ast1	six-cysteine containing astacin protease 1	1.32e-38	-4.70407
Basal Cell	WT	ENSDARG00000071673	ctdspla	CTD (carboxy-terminal domain, RNA polymerase II, polypeptide A) small phosphatase-like a	1.54e-38	-0.57192
Basal Cell	WT	ENSDARG00000041339	zgc:92380	zgc:92380	1.63e-38	-0.941795
Basal Cell	WT	ENSDARG00000004782	fgfr3	fibroblast growth factor receptor 3	6.18e-38	-0.631073	Receptor
Basal Cell	WT	ENSDARG00000076895	flrt3	fibronectin leucine rich transmembrane 3	1.4e-37	-2.44263
Basal Cell	WT	ENSDARG00000027041	pcdh17	protocadherin 17	1.9e-37	-1.19254
Basal Cell	WT	ENSDARG00000069763	etv5a	ets variant 5a	1.96e-37	-1.37352	TF	ETS
Basal Cell	WT	ENSDARG00000099839	si:ch211-9d9.1	si:ch211-9d9.1	2.58e-37	-2.49778	TF	THAP
Basal Cell	WT	ENSDARG00000019260	dhrs9	dehydrogenase/reductase (SDR family) member 9	3.14e-37	-1.66388
Basal Cell	WT	ENSDARG00000013607	sema3gb	sema domain, immunoglobulin domain (Ig), short basic domain, secreted, (semaphorin) 3Gb	3.34e-37	-1.32524	Ligand
Basal Cell	WT	ENSDARG00000101980	bmper	BMP binding endothelial regulator	3.39e-37	-2.16797
Basal Cell	WT	ENSDARG00000006060	crybg1b	crystallin beta-gamma domain containing 1b	4.48e-37	-0.732699
Basal Cell	WT	ENSDARG00000042390	syndig1l	synapse differentiation inducing 1-like	4.55e-37	-2.18255
Basal Cell	WT	ENSDARG00000076238	gramd1c	GRAM domain containing 1c	6.03e-37	-1.05318
Basal Cell	WT	ENSDARG00000007219	actn1	actinin, alpha 1	6.91e-37	-0.281759	TF-cofactor	Actin
Basal Cell	WT	ENSDARG00000090560	mfap5	microfibril associated protein 5	7.19e-37	-1.75737	Ligand
Basal Cell	WT	ENSDARG00000058538	alcamb	activated leukocyte cell adhesion molecule b	1.18e-36	-0.858641
Basal Cell	WT	ENSDARG00000029124	adamts15a	ADAM metallopeptidase with thrombospondin type 1 motif, 15a	1.66e-36	-1.28391
Basal Cell	WT	ENSDARG00000018643	igf2a	insulin-like growth factor 2a	1.82e-36	-1.55408	Ligand
Basal Cell	WT	ENSDARG00000020131	fnbp1l	formin binding protein 1-like	4.11e-36	-0.496964
Basal Cell	WT	ENSDARG00000060534	sgpp1	sphingosine-1-phosphate phosphatase 1	5.07e-36	-1.26807
Basal Cell	WT	ENSDARG00000079068	adam12	ADAM metallopeptidase domain 12	6.47e-36	-1.10638	Ligand
Basal Cell	WT	ENSDARG00000079713	ccl27b	chemokine (C-C motif) ligand 27b	7.17e-36	-2.10395
Basal Cell	WT	ENSDARG00000031907	ptbp1b	polypyrimidine tract binding protein 1b	1.47e-35	-0.733842
Basal Cell	WT	ENSDARG00000056885	per1a	period circadian clock 1a	7.88e-35	-1.37695
Basal Cell	WT	ENSDARG00000090830	tmem132e	transmembrane protein 132E	1.46e-34	-0.433649
Basal Cell	WT	ENSDARG00000057833	gulp1b	GULP PTB domain containing engulfment adaptor 1b	1.65e-34	-2.24969
Basal Cell	WT	ENSDARG00000006604	nectin3b	nectin cell adhesion molecule 3b	2.41e-34	-1.56435	Receptor
Basal Cell	WT	ENSDARG00000061335	galnt1	UDP-N-acetyl-alpha-D-galactosamine:polypeptide N-acetylgalactosaminyltransferase 1	2.58e-34	-0.340942
Basal Cell	WT	ENSDARG00000078541	cers3a	ceramide synthase 3a	3.18e-34	-1.12799
Basal Cell	WT	ENSDARG00000039652	si:dkey-235d18.5	si:dkey-235d18.5	3.24e-34	-1.18353
Basal Cell	WT	ENSDARG00000089643	mcama	melanoma cell adhesion molecule a	3.46e-34	-1.48549	Receptor
Basal Cell	WT	ENSDARG00000052748	capn1b	calpain 1, (mu/I) large subunit b	5.02e-34	-2.59294
Basal Cell	WT	ENSDARG00000098141	supt3h	SPT3 homolog, SAGA and STAGA complex component	1.04e-33	-0.440308	TF-cofactor	SUPT
Basal Cell	WT	ENSDARG00000100053	CABZ01044099.1		1.04e-33	-0.902385
Basal Cell	WT	ENSDARG00000021442	cdh11	cadherin 11, type 2, OB-cadherin (osteoblast)	1.27e-33	-0.780864
Basal Cell	WT	ENSDARG00000075201	inpp4b	inositol polyphosphate-4-phosphatase type II B	1.75e-33	-0.460065
Basal Cell	WT	ENSDARG00000059858	pappab	pregnancy-associated plasma protein A, pappalysin 1b	1.91e-33	-1.31737
Basal Cell	WT	ENSDARG00000078335	amot	angiomotin	3.09e-33	-0.756243
Basal Cell	WT	ENSDARG00000058232	fbrsl1	fibrosin-like 1	3.22e-33	-0.498835
Basal Cell	WT	ENSDARG00000100267	GRM7		4.69e-33	-0.494721	Receptor
Basal Cell	WT	ENSDARG00000087697	lpl	lipoprotein lipase	5.77e-33	-2.40237	Ligand
Basal Cell	WT	ENSDARG00000013343	kif26ba	kinesin family member 26Ba	7.41e-33	-1.10583
Basal Cell	WT	ENSDARG00000098374	FLNB		8.49e-33	-0.761829
Basal Cell	WT	ENSDARG00000044167	padi2	peptidyl arginine deiminase, type II	1.02e-32	-0.589259	TF-cofactor	Other_CRF
Basal Cell	WT	ENSDARG00000096242	si:ch211-76l23.4	si:ch211-76l23.4	1.36e-32	-1.0133
Basal Cell	WT	ENSDARG00000010583	pard3ab	par-3 family cell polarity regulator alpha, b	1.47e-32	-0.340643
Basal Cell	WT	ENSDARG00000105237	mcc	MCC regulator of WNT signaling pathway	1.53e-32	-0.641392
Basal Cell	WT	ENSDARG00000020924	myo1ca	myosin Ic, paralog a	1.75e-32	-1.01929
Basal Cell	WT	ENSDARG00000044827	wnt7aa	wingless-type MMTV integration site family, member 7Aa	1.91e-32	-0.576416	Ligand
Basal Cell	WT	ENSDARG00000103666	dapk2b	death-associated protein kinase 2b	3.36e-32	-0.226503
Basal Cell	WT	ENSDARG00000005479	tenm3	teneurin transmembrane protein 3	3.58e-32	-0.689915
Basal Cell	WT	ENSDARG00000088590	pxna	paxillin a	4.11e-32	-0.315078
Basal Cell	WT	ENSDARG00000078675	dock7	dedicator of cytokinesis 7	4.41e-32	-0.591904
Basal Cell	WT	ENSDARG00000098769	slitrk6	SLIT and NTRK-like family, member 6	5.14e-32	-0.976089
Basal Cell	WT	ENSDARG00000004415	tcf7l2	transcription factor 7 like 2	6.1e-32	-0.361141	TF	HMG
Basal Cell	WT	ENSDARG00000061713	tpd52	tumor protein D52	7.69e-32	-0.61928
Basal Cell	WT	ENSDARG00000098194	SLC39A11		7.91e-32	-0.746827
Basal Cell	WT	ENSDARG00000028793	nlk2	nemo-like kinase, type 2	8.35e-32	-0.70679	TF-cofactor	Others
Basal Cell	WT	ENSDARG00000014626	dlx3b	distal-less homeobox 3b	1.1e-31	-1.20422	TF	Homeobox
Basal Cell	WT	ENSDARG00000035389	fcho2	FCH domain only 2	1.58e-31	-0.374243
Basal Cell	WT	ENSDARG00000011506	lpcat1	lysophosphatidylcholine acyltransferase 1	2.28e-31	-0.67523
Basal Cell	WT	ENSDARG00000069006	tle3b	TLE family member 3, transcriptional corepressor b	2.73e-31	-0.956647	TF-cofactor	Transducin
Basal Cell	WT	ENSDARG00000077217	zgc:162184	zgc:162184	3.45e-31	-1.03785
Basal Cell	WT	ENSDARG00000000857	mapk14a	mitogen-activated protein kinase 14a	4.16e-31	-0.590239
Basal Cell	WT	ENSDARG00000079917	rassf7a	Ras association domain family member 7a	4.4e-31	-0.61576
Basal Cell	WT	ENSDARG00000074843	phldb2b	pleckstrin homology-like domain, family B, member 2b	5.5e-31	-0.669026
Basal Cell	WT	ENSDARG00000099437	si:ch1073-268j14.1	si:ch1073-268j14.1	5.54e-31	-1.43627
Basal Cell	WT	ENSDARG00000052091	rbpjb	recombination signal binding protein for immunoglobulin kappa J region b	7.46e-31	-0.356764	TF	CSL
Basal Cell	WT	ENSDARG00000058094	ciarta	circadian associated repressor of transcription a	1.13e-30	-2.1432
Basal Cell	WT	ENSDARG00000102153	nrp1a	neuropilin 1a	1.29e-30	-0.439087	Receptor
Basal Cell	WT	ENSDARG00000061885	satb2	SATB homeobox 2	1.58e-30	-1.31274	TF	CUT
Basal Cell	WT	ENSDARG00000003061	cd276	CD276 molecule	1.6e-30	-0.609
Basal Cell	WT	ENSDARG00000058672	nuggc.3	nuclear GTPase, germinal center associated, tandem duplicate 3	2.53e-30	-0.501061
Basal Cell	WT	ENSDARG00000032802	ktn1	kinectin 1	2.78e-30	-0.379576
Basal Cell	WT	ENSDARG00000098315	cyp1a	cytochrome P450, family 1, subfamily A	4.67e-30	-2.22173
Basal Cell	WT	ENSDARG00000098112	btc	betacellulin, epidermal growth factor family member	4.78e-30	-1.48681	Ligand
Basal Cell	WT	ENSDARG00000034670	ube2e2	ubiquitin-conjugating enzyme E2E 2	5.95e-30	-0.457593
Basal Cell	WT	ENSDARG00000032614	msi2b	musashi RNA-binding protein 2b	7.82e-30	-0.334938
Basal Cell	WT	ENSDARG00000036548	s1pr2	sphingosine-1-phosphate receptor 2	8.5e-30	-0.409859
Basal Cell	WT	ENSDARG00000061471	sema5ba	sema domain, seven thrombospondin repeats (type 1 and type 1-like), transmembrane domain (TM) and short cytoplasmic domain, (semaphorin) 5Ba	1.01e-29	-0.953395
Basal Cell	WT	ENSDARG00000069953	kcnq5b	potassium voltage-gated channel, KQT-like subfamily, member 5b	1.1e-29	-1.02185	Receptor
Basal Cell	WT	ENSDARG00000074004	stac	SH3 and cysteine rich domain	1.14e-29	-2.16114
Basal Cell	WT	ENSDARG00000018107	rab3da	RAB3D, member RAS oncogene family, a	1.24e-29	-1.16309
Basal Cell	WT	ENSDARG00000060626	dgkaa	diacylglycerol kinase, alpha a	2.01e-29	-0.456095
Basal Cell	WT	ENSDARG00000104267	postnb	periostin, osteoblast specific factor b	2.75e-29	-0.21922
Basal Cell	WT	ENSDARG00000023694	spon1b	spondin 1b	5.67e-29	-0.392235
Basal Cell	WT	ENSDARG00000106873	LO018188.1		9.39e-29	-0.73237
Basal Cell	WT	ENSDARG00000038159	tcf7l1a	transcription factor 7 like 1a	1.04e-28	-0.473746	TF	HMG
Basal Cell	WT	ENSDARG00000054537	nhsl1a	NHS-like 1a	1.94e-28	-0.788634
Basal Cell	WT	ENSDARG00000020053	nkd1	NKD inhibitor of WNT signaling pathway 1	3.2e-28	-0.978739
Basal Cell	WT	ENSDARG00000056651	gfra4a	GDNF family receptor alpha 4a	3.31e-28	-2.15728
Basal Cell	WT	ENSDARG00000058946	CU856539.2		3.79e-28	-0.476169
Basal Cell	WT	ENSDARG00000022971	epha6	eph receptor A6	4e-28	-0.785668
Basal Cell	WT	ENSDARG00000063075	soga1	suppressor of glucose, autophagy associated 1	5.03e-28	-1.03092
Basal Cell	WT	ENSDARG00000070470	sh3rf1	SH3 domain containing ring finger 1	5.48e-28	-0.391767
Basal Cell	WT	ENSDARG00000099184	map2k6	mitogen-activated protein kinase kinase 6	6.78e-28	-0.776947
Basal Cell	WT	ENSDARG00000092199	si:ch211-250c4.4	si:ch211-250c4.4	8.39e-28	-0.862856
Basal Cell	WT	ENSDARG00000013526	svep1	sushi, von Willebrand factor type A, EGF and pentraxin domain containing 1	8.66e-28	-0.911802
Basal Cell	WT	ENSDARG00000016526	gata3	GATA binding protein 3	9.48e-28	-0.922377	TF	zf-GATA
Basal Cell	WT	ENSDARG00000079547	zbtb47b	zinc finger and BTB domain containing 47b	1.03e-27	-1.58265	TF	zf-C2H2
Basal Cell	WT	ENSDARG00000061233	abcc5	ATP-binding cassette, sub-family C (CFTR/MRP), member 5	1.18e-27	-0.392657
Basal Cell	WT	ENSDARG00000012016	hpgd	15-hydroxyprostaglandin dehydrogenase	1.24e-27	-1.58038
Basal Cell	WT	ENSDARG00000104530	znf609b	zinc finger protein 609b	1.39e-27	-0.41702
Basal Cell	WT	ENSDARG00000079889	phldb2a	pleckstrin homology-like domain, family B, member 2a	1.55e-27	-1.31072
Basal Cell	WT	ENSDARG00000051857	tes	testis derived transcript (3 LIM domains)	1.74e-27	-0.732857
Basal Cell	WT	ENSDARG00000077571	zgc:174862	zgc:174862	2.37e-27	-1.25497
Basal Cell	WT	ENSDARG00000090814	si:dkey-18a10.3	si:dkey-18a10.3	2.57e-27	-2.2543	TF	HSF
Basal Cell	WT	ENSDARG00000005364	grin3ba	glutamate receptor, ionotropic, N-methyl-D-aspartate 3Ba	2.92e-27	-1.95156
Basal Cell	WT	ENSDARG00000016866	fam102ab	family with sequence similarity 102 member Ab	3.03e-27	-0.370613
Basal Cell	WT	ENSDARG00000061718	znf704	zinc finger protein 704	3.09e-27	-0.845799
Basal Cell	WT	ENSDARG00000021896	asap3	ArfGAP with SH3 domain, ankyrin repeat and PH domain 3	3.16e-27	-0.601621
Basal Cell	WT	ENSDARG00000031782	crybg1a	crystallin beta-gamma domain containing 1a	3.63e-27	-0.196469
Basal Cell	WT	ENSDARG00000075759	samd4a	sterile alpha motif domain containing 4A	4.34e-27	-0.573782	TF-cofactor	Others
Basal Cell	WT	ENSDARG00000063390	pvrl2l	PVR cell adhesion molecule related 2 like	4.53e-27	-0.301102
Basal Cell	WT	ENSDARG00000041430	bmp2b	bone morphogenetic protein 2b	5.13e-27	-1.4433	Ligand
Basal Cell	WT	ENSDARG00000063578	DGKI		5.73e-27	-0.588739
Basal Cell	WT	ENSDARG00000077881	chl1a	cell adhesion molecule L1-like a	6.66e-27	-0.274552
Basal Cell	WT	ENSDARG00000035285	ncor1	nuclear receptor corepressor 1	8.23e-27	-0.356914	TF	MYB
Basal Cell	WT	ENSDARG00000077499	plekho1b	pleckstrin homology domain containing, family O member 1b	1.18e-26	-0.985183
Basal Cell	WT	ENSDARG00000058128	msna	moesin a	1.23e-26	-0.733889
Basal Cell	WT	ENSDARG00000052633	si:ch211-106n13.3	si:ch211-106n13.3	1.42e-26	-1.19115
Basal Cell	WT	ENSDARG00000037122	TENM2		1.44e-26	-1.43154	TF-cofactor	Others
Basal Cell	WT	ENSDARG00000103823	rbms1b	RNA binding motif, single stranded interacting protein 1b	2.04e-26	-0.46084
Basal Cell	WT	ENSDARG00000034117	rarga	retinoic acid receptor gamma a	2.21e-26	-0.215238	TF	THR-like
Basal Cell	WT	ENSDARG00000037145	slc8a4b	solute carrier family 8 member 4b	2.88e-26	-0.972482
Basal Cell	WT	ENSDARG00000008372	spred2b	sprouty related EVH1 domain containing 2b	4.17e-26	-0.524894
Basal Cell	WT	ENSDARG00000079281	si:dkeyp-75h12.2	si:dkeyp-75h12.2	4.28e-26	-0.600064
Basal Cell	WT	ENSDARG00000042236	atrx	ATRX chromatin remodeler	5.9e-26	-0.469654	TF-cofactor	Others
Basal Cell	WT	ENSDARG00000029457	cacna1sa	calcium channel, voltage-dependent, L type, alpha 1S subunit, a	1.16e-25	-1.57935
Basal Cell	WT	ENSDARG00000092730	enam	enamelin	1.2e-25	-3.68605
Basal Cell	WT	ENSDARG00000051823	hyal4	hyaluronidase 4	1.26e-25	-1.57694
Basal Cell	WT	ENSDARG00000100149	axin2	axin 2 (conductin, axil)	1.32e-25	-0.778881
Basal Cell	WT	ENSDARG00000036541	rhbdf1a	rhomboid 5 homolog 1a (Drosophila)	1.67e-25	-0.376537
Basal Cell	WT	ENSDARG00000109371	pdgfaa	platelet-derived growth factor alpha polypeptide a	2.35e-25	-1.06011	Ligand
[truncated: 8,648 more rows]

## Sheet: Table_5
Cluster	Gene Id	Gene Symbol	Gene Full Name	Specificity	Marker Score	Mean Expression	Fraction Expressed	pseudo R2	Marker test q-value
1	ENSDARG00000103515	vcana	versican a	0.271909	0.0743284	1.185	0.273357	0.13041	0
1	ENSDARG00000075648	sema5bb	sema domain, seven thrombospondin repeats (type 1 and type 1-like), transmembrane domain (TM) and short cytoplasmic domain, (semaphorin) 5Bb	0.216257	0.075931	0.762541	0.351115	0.163881	0
1	ENSDARG00000008060	scara3	scavenger receptor class A, member 3	0.2001	0.0975773	1.042	0.487643	0.210956	0
1	ENSDARG00000078416	zeb2b	zinc finger E-box binding homeobox 2b	0.182151	0.109301	2.48134	0.60006	0.244456	0
1	ENSDARG00000093413	edil3a	EGF-like repeats and discoidin I-like domains 3a	0.177419	0.123573	4.70268	0.696504	0.267048	0
1	ENSDARG00000116937	BX927333.1		0.17452	0.0976215	1.91814	0.559373	0.221555	0
1	ENSDARG00000029124	adamts15a	ADAM metallopeptidase with thrombospondin type 1 motif, 15a	0.170692	0.0739254	0.949774	0.433092	0.139746	0
1	ENSDARG00000098203	APCDD1		0.164665	0.0855088	1.24152	0.519289	0.180827	0
1	ENSDARG00000070494	pdgfra	platelet-derived growth factor receptor, alpha polypeptide	0.164386	0.0761984	1.03204	0.463532	0.153049	0
1	ENSDARG00000074082	gpc5c	glypican 5c	0.159016	0.0763447	1.20862	0.480108	0.149143	0
1	ENSDARG00000069954	kcnq5a	potassium voltage-gated channel, KQT-like subfamily, member 5a	0.1583	0.0986156	4.26507	0.622966	0.203233	0
1	ENSDARG00000102478	ADAMTS7		0.15688	0.104492	2.64174	0.666064	0.23013	0
1	ENSDARG00000038428	sulf1	sulfatase 1	0.155207	0.0830766	2.42248	0.535262	0.147083	0
1	ENSDARG00000015176	ror1	receptor tyrosine kinase-like orphan receptor 1	0.151871	0.0839457	1.57078	0.552743	0.177074	0
1	ENSDARG00000079850	dchs1b	dachsous cadherin-related 1b	0.151848	0.088738	1.80033	0.584388	0.190488	0
1	ENSDARG00000071692	prex2	phosphatidylinositol-3,4,5-trisphosphate-dependent Rac exchange factor 2	0.1485	0.0762194	1.87527	0.513261	0.16472	0
1	ENSDARG00000062510	bcl11ba	BAF chromatin remodeling complex subunit BCL11B a	0.148025	0.0869949	2.40324	0.587703	0.154753	0
1	ENSDARG00000099979	tgfbr3	transforming growth factor, beta receptor III	0.141954	0.130189	6.71915	0.917119	0.34857	0
1	ENSDARG00000028661	cntfr	ciliary neurotrophic factor receptor	0.141496	0.104437	19.5545	0.738095	0.138493	0
1	ENSDARG00000102464	wnt5b	wingless-type MMTV integration site family, member 5b	0.135776	0.0782411	2.51784	0.576251	0.119908	0
1	ENSDARG00000069356	adgrl2a	adhesion G protein-coupled receptor L2a	0.133969	0.0753829	1.28398	0.562688	0.164353	0
1	ENSDARG00000036571	sema3e	sema domain, immunoglobulin domain (Ig), short basic domain, secreted, (semaphorin) 3E	0.133068	0.0970139	2.63728	0.729054	0.217162	0
1	ENSDARG00000062020	gse1	Gse1 coiled-coil protein	0.131515	0.116493	4.91946	0.885775	0.305028	0
1	ENSDARG00000103648	znf536	zinc finger protein 536	0.130343	0.0820241	3.10527	0.629295	0.22944	0
1	ENSDARG00000005479	tenm3	teneurin transmembrane protein 3	0.127505	0.0746276	2.01712	0.585292	0.152709	0
1	ENSDARG00000045064	ablim1b	actin binding LIM protein 1b	0.124062	0.0761646	1.65454	0.613924	0.172837	0
1	ENSDARG00000004415	tcf7l2	transcription factor 7 like 2	0.11954	0.0820348	2.57579	0.686257	0.163093	0
1	ENSDARG00000059233	runx2b	RUNX family transcription factor 2b	0.117532	0.0900438	3.86391	0.766124	0.179737	0
1	ENSDARG00000062338	zeb2a	zinc finger E-box binding homeobox 2a	0.11215	0.076795	2.42667	0.68475	0.164196	0
1	ENSDARG00000039576	fstl1b	follistatin-like 1b	0.108417	0.0743694	2.02106	0.685955	0.149409	0
2	ENSDARG00000069888	cldna	claudin a	0.40512	0.263962	1.66293	0.651565	0.475109	0
2	ENSDARG00000106212	LO017965.1		0.36482	0.0810263	0.294862	0.222099	0.140921	0
2	ENSDARG00000035506	entpd2a.1	ectonucleoside triphosphate diphosphohydrolase 2a, tandem duplicate 1	0.340487	0.0905458	0.308627	0.26593	0.166804	0
2	ENSDARG00000090900	apnl	actinoporin-like protein	0.326515	0.106313	0.504457	0.325599	0.203223	0
2	ENSDARG00000021866	upk1a	uroplakin 1a	0.312468	0.112212	0.42724	0.359116	0.229737	0
2	ENSDARG00000090268	krtt1c19e	keratin type 1 c19e	0.231577	0.132037	2.62322	0.570166	0.239216	0
2	ENSDARG00000039579	cfd	complement factor D (adipsin)	0.216051	0.160825	2.68396	0.744383	0.366988	0
2	ENSDARG00000009544	cldnb	claudin b	0.212999	0.144196	1.64228	0.67698	0.229007	0
2	ENSDARG00000043587	srd5a2a	steroid-5-alpha-reductase, alpha polypeptide 2a	0.20515	0.117498	0.915462	0.572744	0.25125	0
2	ENSDARG00000058371	krt5	keratin 5	0.194024	0.189879	42.4939	0.978637	0.331569	0
2	ENSDARG00000074244	arhgef10lb	Rho guanine nucleotide exchange factor (GEF) 10-like b	0.166801	0.0884076	1.04424	0.530018	0.192874	0
2	ENSDARG00000054609	slco2b1	solute carrier organic anion transporter family, member 2B1	0.159789	0.112411	1.72429	0.703499	0.24559	0
2	ENSDARG00000036830	krt91	keratin 91	0.15882	0.153614	24.1679	0.967219	0.237133	0
2	ENSDARG00000110019	CABZ01079267.1		0.156738	0.113614	1.58432	0.724862	0.184249	0
2	ENSDARG00000098024	si:dkey-262k9.2	si:dkey-262k9.2	0.152135	0.140816	4.34076	0.925599	0.394983	0
2	ENSDARG00000078309	fam83b	family with sequence similarity 83 member B	0.14687	0.10949	1.6713	0.745488	0.213697	0
2	ENSDARG00000067976	ar	androgen receptor	0.143566	0.112473	2.74164	0.783425	0.247063	0
2	ENSDARG00000096359	eppk1	epiplakin 1	0.142629	0.112002	3.19338	0.785267	0.175504	0
2	ENSDARG00000003808	aqp3a	aquaporin 3a	0.141903	0.094445	1.47085	0.665562	0.248325	0
2	ENSDARG00000055093	cdh27	cadherin 27	0.138797	0.0818976	1.2348	0.590055	0.118026	0
2	ENSDARG00000059035	porb	P450 (cytochrome) oxidoreductase b	0.133172	0.0882418	1.45026	0.662615	0.15455	0
2	ENSDARG00000036967	smox	spermine oxidase	0.132753	0.0817052	1.36299	0.61547	0.163125	0
2	ENSDARG00000116617	spaca4l	sperm acrosome associated 4 like	0.128957	0.0953759	1.63136	0.739595	0.159074	0
2	ENSDARG00000022309	dspa	desmoplakin a	0.124017	0.111729	3.9827	0.900921	0.20258	0
2	ENSDARG00000077881	chl1a	cell adhesion molecule L1-like a	0.121197	0.0825838	1.58339	0.6814	0.168552	0
2	ENSDARG00000061764	ahnak	AHNAK nucleoprotein	0.116587	0.115685	30.8605	0.992265	0.324097	0
2	ENSDARG00000054060	pof1b	POF1B actin binding protein	0.112347	0.0926501	2.50722	0.824678	0.175329	0
2	ENSDARG00000063572	perp	p53 apoptosis effector related to pmp22	0.104831	0.0942901	3.71578	0.899448	0.144339	0
2	ENSDARG00000030107	si:ch211-207i1.2	si:ch211-207i1.2	0.100863	0.0860773	2.55646	0.853407	0.213263	0
3	ENSDARG00000078832	si:dkey-73p2.3	si:dkey-73p2.3	0.264646	0.153669	1.03317	0.580657	0.256304	0
3	ENSDARG00000023082	krt1-19d	keratin, type 1, gene 19d	0.256815	0.177411	2.05701	0.690814	0.278518	0
3	ENSDARG00000094041	krt17	keratin 17	0.232793	0.211322	5.7803	0.907767	0.378226	0
3	ENSDARG00000017624	krt4	keratin 4	0.232455	0.228202	21.5953	0.981703	0.447533	0
3	ENSDARG00000007080	rhcgl1	Rh family, C glycoprotein, like 1	0.223447	0.177222	2.50701	0.793129	0.305088	0
3	ENSDARG00000041433	si:dkey-7c18.24	si:dkey-7c18.24	0.219941	0.212057	10.2066	0.964152	0.412302	0
3	ENSDARG00000031588	si:dkey-239b22.1	si:dkey-239b22.1	0.219927	0.160387	1.65885	0.729276	0.26934	0
3	ENSDARG00000056836	si:ch211-125o16.4	si:ch211-125o16.4	0.217812	0.213095	10.6449	0.978342	0.433111	0
3	ENSDARG00000004748	zgc:100868	zgc:100868	0.212943	0.160383	1.8915	0.753174	0.2991	0
3	ENSDARG00000006588	zgc:111983	zgc:111983	0.208429	0.201113	6.50649	0.964899	0.403447	0
3	ENSDARG00000060682	agr1	anterior gradient 1	0.208395	0.161082	2.06571	0.772965	0.272454	0
3	ENSDARG00000100095	anxa1b	annexin A1b	0.206341	0.129136	1.32702	0.62584	0.196355	0
3	ENSDARG00000052413	crfb12	cytokine receptor family member B12	0.195935	0.139818	1.62252	0.713592	0.252493	0
3	ENSDARG00000042055	fam129aa		0.19448	0.165577	2.43779	0.851382	0.322464	0
3	ENSDARG00000103459	evplb	envoplakin b	0.190398	0.124065	1.29248	0.651606	0.210455	0
3	ENSDARG00000042829	si:dkey-30j22.1	si:dkey-30j22.1	0.185613	0.117342	1.17028	0.632188	0.225898	0
3	ENSDARG00000103917	znf185	zinc finger protein 185 with LIM domain	0.182096	0.178765	6.35778	0.981703	0.416318	0
3	ENSDARG00000093584	zgc:193505	zgc:193505	0.179816	0.153831	3.13524	0.855489	0.267455	0
3	ENSDARG00000101043	ppl	periplakin	0.179479	0.177066	8.58679	0.986557	0.415503	0
3	ENSDARG00000076230	atp10b	ATPase phospholipid transporting 10B	0.176569	0.134372	1.82105	0.761016	0.251136	0
3	ENSDARG00000103199	si:dkey-247k7.2	si:dkey-247k7.2	0.176495	0.151319	3.68508	0.857356	0.278866	0
3	ENSDARG00000019808	evpla	envoplakin a	0.172147	0.169769	7.61733	0.986184	0.418865	0
3	ENSDARG00000015709	hsd17b12a	hydroxysteroid (17-beta) dehydrogenase 12a	0.16293	0.116022	1.55211	0.712099	0.192371	0
3	ENSDARG00000021787	abcb5	ATP-binding cassette, sub-family B (MDR/TAP), member 5	0.162766	0.140157	5.24002	0.86109	0.243949	0
3	ENSDARG00000036588	mhc1zba	major histocompatibility complex class I ZBA	0.159775	0.128333	2.22229	0.803211	0.237722	0
3	ENSDARG00000015016	kif26ab	kinesin family member 26Ab	0.152104	0.128817	3.07915	0.846901	0.265767	0
3	ENSDARG00000015887	b2ml	beta-2-microglobulin, like	0.150174	0.12337	2.37473	0.821509	0.22158	0
3	ENSDARG00000096359	eppk1	epiplakin 1	0.14284	0.119371	3.19955	0.835698	0.204974	0
3	ENSDARG00000036830	krt91	keratin 91	0.137331	0.134818	19.982	0.981703	0.267163	0
3	ENSDARG00000102146	si:ch211-69b7.6	si:ch211-69b7.6	0.12599	0.121944	11.7474	0.967886	0.234509	0
4	ENSDARG00000039964	fgfbp2a	fibroblast growth factor binding protein 2a	0.294667	0.143812	2.02483	0.488051	0.283222	0
4	ENSDARG00000054753	col10a1a	collagen, type X, alpha 1a	0.294363	0.261278	19.5367	0.887603	0.5097	0
4	ENSDARG00000105153	ifitm5	interferon induced transmembrane protein 5	0.281199	0.133984	0.869093	0.476475	0.285526	0
4	ENSDARG00000012422	col11a2	collagen, type XI, alpha 2	0.275784	0.213378	2.99659	0.773712	0.502465	0
4	ENSDARG00000004627	panx3	pannexin 3	0.272318	0.255031	4.61677	0.93652	0.65778	0
4	ENSDARG00000022437	cd81b	CD81 molecule b	0.270254	0.226355	2.5604	0.837565	0.554478	0
4	ENSDARG00000052633	si:ch211-106n13.3	si:ch211-106n13.3	0.26765	0.24956	6.61433	0.932412	0.659091	0
4	ENSDARG00000098226	smpd3	sphingomyelin phosphodiesterase 3, neutral	0.263087	0.212101	2.58078	0.806199	0.52423	0
4	ENSDARG00000079572	plcd3b	phospholipase C, delta 3b	0.260207	0.141278	0.917339	0.542942	0.326736	0
4	ENSDARG00000052520	sgms2a	sphingomyelin synthase 2a	0.25296	0.138382	0.992532	0.54705	0.315909	0
4	ENSDARG00000037145	slc8a4b	solute carrier family 8 member 4b	0.252499	0.245051	7.23914	0.9705	0.685289	0
4	ENSDARG00000095259	tmem119a	transmembrane protein 119a	0.24703	0.125083	0.767722	0.506348	0.306184	0
4	ENSDARG00000015731	ano5a	anoctamin 5a	0.238357	0.190294	2.08059	0.798357	0.483213	0
4	ENSDARG00000101592	prp		0.232773	0.22017	5.24645	0.945855	0.60868	0
4	ENSDARG00000061977	ppfibp2a	PPFIA binding protein 2a	0.231604	0.196059	5.7932	0.846527	0.479877	0
4	ENSDARG00000024847	col5a2b	collagen, type V, alpha 2b	0.230681	0.167627	1.90257	0.726662	0.405742	0
4	ENSDARG00000025089	loxl4	lysyl oxidase-like 4	0.224371	0.202587	4.2707	0.902913	0.55133	0
4	ENSDARG00000103638	CR936977.2		0.220993	0.159927	2.21379	0.723674	0.383247	0
4	ENSDARG00000096546	nrp2a	neuropilin 2a	0.202608	0.173631	3.68492	0.856983	0.464057	0
4	ENSDARG00000023542	cdh7a	cadherin 7a	0.202249	0.144248	2.24422	0.713219	0.320482	0
4	ENSDARG00000002507	itga10	integrin, alpha 10	0.201785	0.125833	1.45873	0.6236	0.302501	0
4	ENSDARG00000019516	sp7	Sp7 transcription factor	0.197728	0.137701	1.5731	0.696415	0.330308	0
4	ENSDARG00000026165	col11a1a	collagen, type XI, alpha 1a	0.193435	0.163748	3.69996	0.846527	0.430696	0
4	ENSDARG00000007172	plxna3	plexin A3	0.166062	0.156079	5.75675	0.939881	0.474136	0
4	ENSDARG00000076994	adgra2	adhesion G protein-coupled receptor A2	0.148552	0.125365	3.29657	0.843913	0.315666	0
4	ENSDARG00000020957	pth1ra	parathyroid hormone 1 receptor a	0.147904	0.130617	3.2509	0.883122	0.312327	0
4	ENSDARG00000038446	nrp2b	neuropilin 2b	0.147085	0.12863	4.41576	0.874533	0.37036	0
4	ENSDARG00000026784	robo1	roundabout, axon guidance receptor, homolog 1 (Drosophila)	0.140848	0.132643	6.9291	0.941748	0.372102	0
4	ENSDARG00000040261	runx2a	RUNX family transcription factor 2a	0.138668	0.135199	10.0444	0.974981	0.373297	0
4	ENSDARG00000021442	cdh11	cadherin 11, type 2, OB-cadherin (osteoblast)	0.133991	0.125886	5.11279	0.939507	0.350066	0
5	ENSDARG00000098294	col5a3a	collagen, type V, alpha 3a	0.24051	0.202125	5.89248	0.840404	0.474118	0
5	ENSDARG00000010318	srpx	sushi-repeat containing protein X-linked	0.217864	0.0974447	0.703168	0.447273	0.214283	0
5	ENSDARG00000017953	tp73	tumor protein p73	0.203124	0.144936	1.60434	0.713535	0.366444	0
5	ENSDARG00000069415	col17a1a	collagen, type XVII, alpha 1a	0.200415	0.106483	1.14536	0.531313	0.238764	0
5	ENSDARG00000043806	postna	periostin, osteoblast specific factor a	0.1904	0.152935	7.80881	0.803232	0.364363	0
5	ENSDARG00000057590	si:ch1073-396h14.1	si:ch1073-396h14.1	0.189808	0.100311	0.912735	0.528485	0.215232	0
5	ENSDARG00000103666	dapk2b	death-associated protein kinase 2b	0.186235	0.155083	2.4321	0.832727	0.403953	0
5	ENSDARG00000036558	col18a1a	collagen type XVIII alpha 1 chain a	0.173525	0.148215	5.22456	0.854141	0.39182	0
5	ENSDARG00000027867	paplna	papilin a, proteoglycan-like sulfated glycoprotein	0.169459	0.0988682	1.22559	0.583434	0.235192	0
5	ENSDARG00000079011	col17a1b	collagen, type XVII, alpha 1b	0.166078	0.125951	2.23362	0.758384	0.339521	0
5	ENSDARG00000033437	rps6ka1	ribosomal protein S6 kinase a, polypeptide 1	0.164998	0.133465	2.17586	0.808889	0.371393	0
5	ENSDARG00000028507	itgb4	integrin, beta 4	0.159247	0.157381	11.0136	0.988283	0.531887	0
5	ENSDARG00000001968	dock5	dedicator of cytokinesis 5	0.149011	0.109335	1.54009	0.733737	0.284778	0
5	ENSDARG00000007219	actn1	actinin, alpha 1	0.148495	0.102897	1.66291	0.692929	0.252665	0
5	ENSDARG00000069946	itga6b	integrin, alpha 6b	0.145696	0.131038	5.74901	0.899394	0.345397	0
5	ENSDARG00000044356	tp63	tumor protein p63	0.140952	0.125974	3.65588	0.893737	0.334169	0
5	ENSDARG00000006314	itgav	integrin, alpha V	0.140011	0.10143	1.61937	0.724444	0.244566	0
5	ENSDARG00000035809	col1a1b	collagen, type I, alpha 1b	0.138886	0.133331	19.6616	0.96	0.333688	0
5	ENSDARG00000018984	eya2	EYA transcriptional coactivator and phosphatase 2	0.134291	0.0977206	3.00379	0.727677	0.227862	0
5	ENSDARG00000031678	col5a2a	collagen, type V, alpha 2a	0.132283	0.104116	2.83524	0.787071	0.211433	0
5	ENSDARG00000019353	sparc	secreted protein, acidic, cysteine-rich (osteonectin)	0.131447	0.107017	4.71608	0.814141	0.213624	0
5	ENSDARG00000074201	flna	filamin A, alpha (actin binding protein 280)	0.125449	0.101931	2.30006	0.812525	0.232855	0
5	ENSDARG00000062579	kremen1	kringle containing transmembrane protein 1	0.121968	0.111521	14.4716	0.914343	0.205995	0
5	ENSDARG00000043226	nfixa	nuclear factor I/Xa	0.120283	0.113479	5.53987	0.943434	0.297171	0
5	ENSDARG00000020007	col1a2	collagen, type I, alpha 2	0.119147	0.110819	10.7226	0.930101	0.25906	0
5	ENSDARG00000012593	col5a1	procollagen, type V, alpha 1	0.116655	0.107464	7.21629	0.921212	0.245361	0
5	ENSDARG00000012405	col1a1a	collagen, type I, alpha 1a	0.115238	0.102154	8.7318	0.886465	0.225711	0
5	ENSDARG00000027600	pdlim5b	PDZ and LIM domain 5b	0.114661	0.0946936	2.6457	0.825859	0.236607	0
5	ENSDARG00000012914	arhgef4	Rho guanine nucleotide exchange factor (GEF) 4	0.109473	0.101157	4.03225	0.92404	0.27511	0
5	ENSDARG00000079388	agrn	agrin	0.105345	0.0975985	4.00817	0.926465	0.279144	0
6	ENSDARG00000093494	si:ch211-217k17.9	si:ch211-217k17.9	0.381632	0.332601	2.88489	0.871522	0.530469	0
6	ENSDARG00000098837	tgm5l	transglutaminase 5, like	0.306857	0.240313	2.05412	0.783142	0.399088	0
6	ENSDARG00000111240	dhrs13a.2	dehydrogenase/reductase (SDR family) member 13a, tandem duplicate 2	0.288268	0.27553	4.39677	0.95581	0.527204	0
6	ENSDARG00000092778	si:ch73-338o16.4	si:ch73-338o16.4	0.282831	0.185854	1.1996	0.657119	0.276575	0
6	ENSDARG00000092551	si:dkey-56e3.2	si:dkey-56e3.2	0.278436	0.252574	3.29444	0.907119	0.44451	0
6	ENSDARG00000041051	mid1ip1a	MID1 interacting protein 1a	0.275477	0.18925	1.474	0.686989	0.291868	0
6	ENSDARG00000021372	tob1b	transducer of ERBB2, 1b	0.272028	0.183653	1.36674	0.675123	0.318595	0
6	ENSDARG00000087093	si:ch211-157c3.4	si:ch211-157c3.4	0.264723	0.248042	4.36596	0.936989	0.452066	0
6	ENSDARG00000078619	pnp5a	purine nucleoside phosphorylase 5a	0.263713	0.188613	1.74925	0.715221	0.328836	0
6	ENSDARG00000006588	zgc:111983	zgc:111983	0.256864	0.252975	8.57924	0.984861	0.488232	0
6	ENSDARG00000021787	abcb5	ATP-binding cassette, sub-family B (MDR/TAP), member 5	0.241218	0.230756	8.80801	0.956628	0.442836	0
6	ENSDARG00000103199	si:dkey-247k7.2	si:dkey-247k7.2	0.238982	0.226074	5.50033	0.94599	0.414138	0
6	ENSDARG00000019360	sec23b	SEC23 homolog B, coat complex II component	0.238583	0.214178	2.65548	0.897709	0.425679	0
6	ENSDARG00000102146	si:ch211-69b7.6	si:ch211-69b7.6	0.234823	0.234631	26.6297	0.999182	0.579483	0
6	ENSDARG00000043442	zgc:153665	zgc:153665	0.233296	0.195686	2.5693	0.838789	0.344275	0
6	ENSDARG00000031588	si:dkey-239b22.1	si:dkey-239b22.1	0.230503	0.181555	1.76526	0.787643	0.302144	0
6	ENSDARG00000093584	zgc:193505	zgc:193505	0.2288	0.212698	4.31039	0.929624	0.375854	0
6	ENSDARG00000060682	agr1	anterior gradient 1	0.225321	0.188167	2.29055	0.835106	0.3188	0
6	ENSDARG00000056836	si:ch211-125o16.4	si:ch211-125o16.4	0.215596	0.213567	10.5018	0.990589	0.437409	0
6	ENSDARG00000015709	hsd17b12a	hydroxysteroid (17-beta) dehydrogenase 12a	0.215593	0.189394	2.2456	0.878478	0.366172	0
6	ENSDARG00000007080	rhcgl1	Rh family, C glycoprotein, like 1	0.211565	0.174688	2.33215	0.825696	0.294264	0
6	ENSDARG00000041433	si:dkey-7c18.24	si:dkey-7c18.24	0.210869	0.206124	9.65336	0.977496	0.401329	0
6	ENSDARG00000036588	mhc1zba	major histocompatibility complex class I ZBA	0.199843	0.179319	2.984	0.8973	0.357154	0
6	ENSDARG00000070426	chac1	ChaC, cation transport regulator homolog 1 (E. coli)	0.199598	0.178201	2.46341	0.892799	0.341631	0
6	ENSDARG00000015887	b2ml	beta-2-microglobulin, like	0.195819	0.181077	3.36683	0.924714	0.372254	0
6	ENSDARG00000042055	fam129aa		0.194839	0.173793	2.44373	0.89198	0.336693	0
6	ENSDARG00000103917	znf185	zinc finger protein 185 with LIM domain	0.186785	0.183881	6.5745	0.984452	0.420054	0
6	ENSDARG00000017624	krt4	keratin 4	0.182901	0.180581	15.7303	0.987316	0.364449	0
6	ENSDARG00000101043	ppl	periplakin	0.17802	0.176345	8.49499	0.990589	0.406845	0
6	ENSDARG00000019808	evpla	envoplakin a	0.174072	0.173075	7.72962	0.994272	0.425473	0
7	ENSDARG00000097157	si:ch211-207n23.2	si:ch211-207n23.2	0.349339	0.240072	1.41783	0.687218	0.294399	0
7	ENSDARG00000093936	si:dkeyp-1h4.6	si:dkeyp-1h4.6	0.34159	0.262314	1.74344	0.76792	0.353147	0
7	ENSDARG00000093584	zgc:193505	zgc:193505	0.327151	0.324527	6.91019	0.99198	0.553402	0
7	ENSDARG00000103199	si:dkey-247k7.2	si:dkey-247k7.2	0.320009	0.314074	8.08662	0.981454	0.516223	0
7	ENSDARG00000100003	glulb	glutamate-ammonia ligase (glutamine synthase) b	0.314683	0.185497	1.32127	0.589474	0.236541	0
7	ENSDARG00000023082	krt1-19d	keratin, type 1, gene 19d	0.31016	0.252015	2.63886	0.812531	0.347298	0
7	ENSDARG00000087093	si:ch211-157c3.4	si:ch211-157c3.4	0.301444	0.292227	5.18262	0.969424	0.479376	0
7	ENSDARG00000096712	si:dkey-193p11.2	si:dkey-193p11.2	0.297828	0.28484	7.10036	0.956391	0.47254	0
7	ENSDARG00000041051	mid1ip1a	MID1 interacting protein 1a	0.289933	0.196777	1.57697	0.678697	0.253474	0
7	ENSDARG00000017624	krt4	keratin 4	0.287781	0.287349	28.6418	0.998496	0.504701	0
7	ENSDARG00000092551	si:dkey-56e3.2	si:dkey-56e3.2	0.284581	0.265039	3.3908	0.931328	0.419535	0
7	ENSDARG00000100582	si:ch211-195b11.3	si:ch211-195b11.3	0.279968	0.220887	1.54686	0.788972	0.342624	0
7	ENSDARG00000105104	si:dkey-223p19.1	si:dkey-223p19.1	0.27917	0.203885	1.32381	0.730326	0.290284	0
7	ENSDARG00000043442	zgc:153665	zgc:153665	0.263192	0.232981	3.0139	0.885213	0.377253	0
7	ENSDARG00000060682	agr1	anterior gradient 1	0.253126	0.222675	2.67203	0.879699	0.349686	0
7	ENSDARG00000100095	anxa1b	annexin A1b	0.252124	0.194622	1.73004	0.77193	0.282694	0
7	ENSDARG00000056836	si:ch211-125o16.4	si:ch211-125o16.4	0.249572	0.248071	12.7466	0.993985	0.471279	0
7	ENSDARG00000041433	si:dkey-7c18.24	si:dkey-7c18.24	0.247915	0.244684	11.9594	0.986967	0.429427	0
7	ENSDARG00000021787	abcb5	ATP-binding cassette, sub-family B (MDR/TAP), member 5	0.244768	0.234339	8.98	0.957393	0.404513	0
7	ENSDARG00000006588	zgc:111983	zgc:111983	0.242237	0.239323	7.93864	0.98797	0.422674	0
7	ENSDARG00000111240	dhrs13a.2	dehydrogenase/reductase (SDR family) member 13a, tandem duplicate 2	0.2388	0.217733	3.42775	0.911779	0.353813	0
7	ENSDARG00000094041	krt17	keratin 17	0.23683	0.216412	5.9134	0.913784	0.316201	0
7	ENSDARG00000031588	si:dkey-239b22.1	si:dkey-239b22.1	0.235529	0.187715	1.8164	0.796992	0.280509	0
7	ENSDARG00000007080	rhcgl1	Rh family, C glycoprotein, like 1	0.226709	0.192958	2.55557	0.851128	0.299701	0
7	ENSDARG00000102146	si:ch211-69b7.6	si:ch211-69b7.6	0.215522	0.215198	23.7719	0.998496	0.462567	0
7	ENSDARG00000036588	mhc1zba	major histocompatibility complex class I ZBA	0.214385	0.198588	3.27439	0.926316	0.359381	0
7	ENSDARG00000042055	fam129aa		0.208838	0.189996	2.67839	0.909774	0.343796	0
7	ENSDARG00000070426	chac1	ChaC, cation transport regulator homolog 1 (E. coli)	0.199547	0.178642	2.46257	0.895238	0.303266	0
7	ENSDARG00000015887	b2ml	beta-2-microglobulin, like	0.197067	0.185608	3.39518	0.941855	0.358335	0
7	ENSDARG00000101043	ppl	periplakin	0.187436	0.185463	9.09219	0.989474	0.39848	0
8	ENSDARG00000058543	lama5	laminin, alpha 5	0.238764	0.17525	2.44718	0.733988	0.359973	0
8	ENSDARG00000020080	ek1	eph-like kinase 1	0.235992	0.0959328	0.610664	0.406508	0.182622	0
8	ENSDARG00000099088	edar	ectodysplasin A receptor	0.227444	0.1465	1.24166	0.644112	0.313704	0
8	ENSDARG00000076321	col28a2a	collagen, type XXVIII, alpha 2a	0.21706	0.100346	0.808886	0.462293	0.187436	0
8	ENSDARG00000054619	fras1	Fraser extracellular matrix complex subunit 1	0.202	0.144301	1.97831	0.71436	0.320758	0
8	ENSDARG00000011490	scube3	signal peptide, CUB domain, EGF-like 3	0.199647	0.113745	1.0791	0.569731	0.229735	0
8	ENSDARG00000101209	lamb1a	laminin, beta 1a	0.191373	0.112392	1.22699	0.587293	0.232124	0
8	ENSDARG00000031894	lef1	lymphoid enhancer-binding factor 1	0.189749	0.160345	7.98634	0.845041	0.301628	0
8	ENSDARG00000056530	cpamd8	C3 and PZP like alpha-2-macroglobulin domain containing 8	0.185518	0.130706	1.67238	0.704545	0.273141	0
8	ENSDARG00000068365	lmx1bb	LIM homeobox transcription factor 1, beta b	0.185008	0.143056	3.95404	0.773244	0.315827	0
8	ENSDARG00000090190	bcam	basal cell adhesion molecule (Lutheran blood group)	0.178947	0.0995486	1.48314	0.556302	0.198985	0
8	ENSDARG00000103479	ptprfa	protein tyrosine phosphatase receptor type Fa	0.169561	0.115435	2.36296	0.680785	0.299766	0
8	ENSDARG00000074132	scpp7	secretory calcium-binding phosphoprotein 7	0.155906	0.125305	12.7442	0.803719	0.220936	0
8	ENSDARG00000059960	plch2a	phospholipase C, eta 2a	0.152283	0.107841	2.5132	0.708161	0.252288	0
8	ENSDARG00000062579	kremen1	kringle containing transmembrane protein 1	0.150278	0.147328	18.9967	0.980372	0.377093	0
8	ENSDARG00000077818	nrg2a	neuregulin 2a	0.147278	0.104525	1.61969	0.709711	0.2216	0
8	ENSDARG00000105071	nos1apa	nitric oxide synthase 1 (neuronal) adaptor protein a	0.141204	0.0794274	1.35911	0.5625	0.145525	0
8	ENSDARG00000054616	cldni	claudin i	0.139953	0.0796631	0.975414	0.569215	0.164943	0
8	ENSDARG00000062510	bcl11ba	BAF chromatin remodeling complex subunit BCL11B a	0.133086	0.0941777	2.09159	0.707645	0.148812	0
8	ENSDARG00000001968	dock5	dedicator of cytokinesis 5	0.13189	0.0953067	1.31324	0.722624	0.214948	0
8	ENSDARG00000036558	col18a1a	collagen type XVIII alpha 1 chain a	0.131138	0.104991	3.62075	0.80062	0.236096	0
8	ENSDARG00000043806	postna	periostin, osteoblast specific factor a	0.122226	0.0805582	4.37008	0.659091	0.142067	0
8	ENSDARG00000103666	dapk2b	death-associated protein kinase 2b	0.119836	0.0838726	1.36593	0.699897	0.172769	0
8	ENSDARG00000058115	fgfr2	fibroblast growth factor receptor 2	0.114281	0.102888	2.96917	0.90031	0.213676	0
8	ENSDARG00000036279	lamc1	laminin, gamma 1	0.113908	0.0791945	1.39611	0.695248	0.17506	0
8	ENSDARG00000075565	lzts1	leucine zipper, putative tumor suppressor 1	0.11361	0.0835647	1.63396	0.735537	0.187583	0
8	ENSDARG00000016404	ptch1	patched 1	0.107934	0.0758211	1.67798	0.702479	0.11428	3.23738e-305
9	ENSDARG00000078362	zmp:0000000846	zmp:0000000846	0.266363	0.131194	2.75347	0.492537	0.207379	0
9	ENSDARG00000007275	si:ch211-251b21.1	si:ch211-251b21.1	0.226037	0.053059	0.634934	0.234735	0.0792099	5.24255e-176
9	ENSDARG00000099930	col27a1b	collagen, type XXVII, alpha 1b	0.199313	0.0635529	0.779308	0.31886	0.107616	1.3792e-241
9	ENSDARG00000071095	abi3bpb	ABI family, member 3 (NESH) binding protein b	0.198754	0.0783418	1.70046	0.394166	0.141404	0
9	ENSDARG00000095268	si:dkey-261h17.1	si:dkey-261h17.1	0.159793	0.0547458	1.17584	0.342605	0.0644315	4.23068e-142
9	ENSDARG00000089066	nhsl2	NHS-like 2	0.143066	0.0885187	2.15782	0.618725	0.149075	0
9	ENSDARG00000077139	col6a3	collagen, type VI, alpha 3	0.127244	0.0921094	2.42341	0.723881	0.182388	0
9	ENSDARG00000060753	pear1	platelet endothelial aggregation receptor 1	0.124592	0.0543504	1.14385	0.436228	0.0836722	2.83944e-186
9	ENSDARG00000078026	zcchc24	zinc finger, CCHC domain containing 24	0.121049	0.0633988	1.64025	0.523745	0.0891362	7.32386e-199
9	ENSDARG00000061436	col6a2	collagen, type VI, alpha 2	0.11557	0.0643713	1.56677	0.556988	0.0928775	1.71217e-207
9	ENSDARG00000074908	col6a1	collagen, type VI, alpha 1	0.114425	0.0707199	1.91628	0.618046	0.106928	5.4252e-240
9	ENSDARG00000075542	zfhx4	zinc finger homeobox 4	0.114291	0.0531135	1.12428	0.464722	0.131908	4.17057e-298
9	ENSDARG00000078322	col12a1a	collagen, type XII, alpha 1a	0.114067	0.0796305	3.78496	0.6981	0.12897	3.00212e-291
9	ENSDARG00000059933	plpp3	phospholipid phosphatase 3	0.10937	0.0532752	1.57155	0.48711	0.0616379	1.04803e-135
9	ENSDARG00000097827	lrp1aa	low density lipoprotein receptor-related protein 1Aa	0.109259	0.0550745	1.01046	0.504071	0.102266	3.40746e-229
9	ENSDARG00000103057	zfhx3	zinc finger homeobox 3	0.108736	0.0576876	1.46343	0.530529	0.122686	1.33755e-276
9	ENSDARG00000019601	col12a1b	collagen, type XII, alpha 1b	0.103413	0.0623707	3.95504	0.603121	0.145468	0
9	ENSDARG00000089913	cacna1g	calcium channel, voltage-dependent, T type, alpha 1G subunit	0.100779	0.0555855	2.33721	0.55156	0.150723	0
10	ENSDARG00000075433	myom2a	myomesin 2a	0.517762	0.318014	1.91839	0.614209	0.437122	0
10	ENSDARG00000055642	si:ch211-217a12.1	si:ch211-217a12.1	0.47822	0.21993	1.4473	0.459893	0.30011	0
10	ENSDARG00000035458	atp2a1l	ATPase sarcoplasmic/endoplasmic reticulum Ca2+ transporting 1, like	0.46455	0.326853	3.54452	0.703591	0.476652	0
10	ENSDARG00000096257	si:ch73-367p23.2	si:ch73-367p23.2	0.464417	0.218194	0.955688	0.469824	0.313224	0
10	ENSDARG00000023797	ryr1b	ryanodine receptor 1b (skeletal)	0.458647	0.354584	3.61398	0.773109	0.550874	0
10	ENSDARG00000012944	myhz2	myosin, heavy polypeptide 2, fast muscle specific	0.445171	0.193848	4.70306	0.435447	0.203863	0
10	ENSDARG00000068457	tnnt3b	troponin T type 3b (skeletal, fast)	0.438023	0.354033	4.68881	0.808251	0.554802	0
10	ENSDARG00000003081	mybphb	myosin binding protein Hb	0.436671	0.211497	1.31683	0.484339	0.313405	0
10	ENSDARG00000067990	myhz1.1	myosin, heavy polypeptide 1.1, skeletal muscle	0.434964	0.216651	7.2997	0.49809	0.215175	0
10	ENSDARG00000071331	ryr3	ryanodine receptor 3	0.433857	0.26449	1.95306	0.609626	0.407316	0
10	ENSDARG00000020594	txlnba	taxilin beta a	0.427596	0.25806	1.46647	0.603514	0.417124	0
10	ENSDARG00000021184	rbfox1l	RNA binding fox-1 homolog 1, like	0.423544	0.20708	0.953793	0.488923	0.33059	0
10	ENSDARG00000053254	mylpfa	myosin light chain, phosphorylatable, fast skeletal muscle a	0.413774	0.283225	9.80939	0.684492	0.305265	0
10	ENSDARG00000104384	AGBL1		0.41131	0.273997	8.75621	0.666157	0.422997	0
10	ENSDARG00000110698	CABZ01061524.1		0.400965	0.1795	0.884526	0.44767	0.264074	0
10	ENSDARG00000099974	ldb3b	LIM domain binding 3b	0.395925	0.248625	1.76776	0.62796	0.428361	0
10	ENSDARG00000056322	ldb3a	LIM domain binding 3a	0.381704	0.208785	1.13498	0.546982	0.349541	0
10	ENSDARG00000033832	ampd1	adenosine monophosphate deaminase 1 (isoform M)	0.375989	0.180957	1.21198	0.481283	0.299427	0
10	ENSDARG00000002768	pvalb2	parvalbumin 2	0.361424	0.222818	5.42109	0.616501	0.267473	0
10	ENSDARG00000017441	mylz3	myosin, light polypeptide 3, skeletal muscle	0.344175	0.238477	4.15395	0.692895	0.358459	0
10	ENSDARG00000067848	nmrk2	nicotinamide riboside kinase 2	0.336415	0.211769	2.7606	0.629488	0.427412	0
10	ENSDARG00000028213	ttn.2	titin, tandem duplicate 2	0.326025	0.315315	34.6255	0.96715	0.67475	0
10	ENSDARG00000099197	actc1b	actin alpha cardiac muscle 1b	0.324208	0.230339	4.8022	0.710466	0.366551	0
10	ENSDARG00000041779	trdn	triadin	0.321687	0.205938	1.76547	0.640183	0.41238	0
10	ENSDARG00000057903	si:ch211-266g18.10	si:ch211-266g18.10	0.318106	0.214825	2.02308	0.675325	0.433422	0
10	ENSDARG00000000563	ttn.1	titin, tandem duplicate 1	0.31466	0.299757	26.8692	0.952636	0.621312	0
10	ENSDARG00000090408	ERBB4		0.312723	0.185627	1.44232	0.593583	0.350204	0
10	ENSDARG00000032630	neb	nebulin	0.288461	0.222791	4.03008	0.772345	0.455466	0
10	ENSDARG00000098764	musk	muscle, skeletal, receptor tyrosine kinase	0.276595	0.184467	2.04129	0.666921	0.360641	0
10	ENSDARG00000029764	mef2ca	myocyte enhancer factor 2ca	0.24825	0.188321	2.80854	0.758594	0.3632	0
11	ENSDARG00000042677	cadm1b	cell adhesion molecule 1b	0.295499	0.169692	1.04841	0.574257	0.240927	0
11	ENSDARG00000024847	col5a2b	collagen, type V, alpha 2b	0.263097	0.219524	2.26426	0.834383	0.359713	0
11	ENSDARG00000061885	satb2	SATB homeobox 2	0.252132	0.20629	3.63019	0.818182	0.306838	0
11	ENSDARG00000019516	sp7	Sp7 transcription factor	0.24742	0.201098	2.1163	0.812781	0.329541	0
11	ENSDARG00000035677	bmp8a	bone morphogenetic protein 8a	0.231817	0.098903	0.587442	0.426643	0.139452	3.43413e-261
11	ENSDARG00000002507	itga10	integrin, alpha 10	0.211136	0.143861	1.54876	0.681368	0.230417	0
11	ENSDARG00000054753	col10a1a	collagen, type X, alpha 1a	0.202063	0.164597	11.8783	0.814581	0.224957	0
11	ENSDARG00000101592	prp		0.198364	0.178724	4.24593	0.90099	0.335183	0
11	ENSDARG00000004627	panx3	pannexin 3	0.191576	0.125188	2.89935	0.653465	0.190999	0
11	ENSDARG00000061977	ppfibp2a	PPFIA binding protein 2a	0.189905	0.158624	4.45585	0.835284	0.266875	0
11	ENSDARG00000022437	cd81b	CD81 molecule b	0.187438	0.112699	1.57806	0.60126	0.168778	0
11	ENSDARG00000090338	fam20cb	FAM20C golgi associated secretory pathway kinase b	0.186765	0.170795	5.37862	0.914491	0.31835	0
11	ENSDARG00000012422	col11a2	collagen, type XI, alpha 2	0.186345	0.11221	1.78429	0.60216	0.166793	0
11	ENSDARG00000037145	slc8a4b	solute carrier family 8 member 4b	0.186164	0.142262	4.8377	0.764176	0.236748	0
11	ENSDARG00000098226	smpd3	sphingomyelin phosphodiesterase 3, neutral	0.185755	0.114028	1.62868	0.613861	0.176351	0
11	ENSDARG00000033327	unc5b	unc-5 netrin receptor B	0.185662	0.137199	2.87891	0.738974	0.229579	0
11	ENSDARG00000103638	CR936977.2		0.180133	0.116738	1.68988	0.648065	0.181354	0
11	ENSDARG00000034375	chst11	carbohydrate (chondroitin 4) sulfotransferase 11	0.178219	0.0915959	0.937688	0.513951	0.144182	2.39986e-270
11	ENSDARG00000025089	loxl4	lysyl oxidase-like 4	0.17203	0.134094	3.00733	0.779478	0.229545	0
11	ENSDARG00000096546	nrp2a	neuropilin 2a	0.171974	0.132657	2.96847	0.771377	0.223851	0
11	ENSDARG00000078866	sdk1a	sidekick cell adhesion molecule 1a	0.170231	0.149086	3.30136	0.875788	0.294627	0
11	ENSDARG00000015731	ano5a	anoctamin 5a	0.16418	0.101227	1.27185	0.616562	0.158826	9.31994e-299
11	ENSDARG00000052633	si:ch211-106n13.3	si:ch211-106n13.3	0.162929	0.103095	3.43362	0.632763	0.160738	1.79358e-302
11	ENSDARG00000052826	runx3	RUNX family transcription factor 3	0.152995	0.148038	6.9103	0.967597	0.298484	0
11	ENSDARG00000009899	znf385a	zinc finger protein 385A	0.148428	0.0992641	2.06994	0.668767	0.17176	0
11	ENSDARG00000092730	enam	enamelin	0.146003	0.0988247	6.04518	0.676868	0.16285	1.39656e-306
11	ENSDARG00000007172	plxna3	plexin A3	0.13602	0.113493	4.43319	0.834383	0.192389	0
11	ENSDARG00000059801	pdzd2	PDZ domain containing 2	0.133302	0.0975469	1.74151	0.731773	0.164792	0
11	ENSDARG00000021442	cdh11	cadherin 11, type 2, OB-cadherin (osteoblast)	0.13281	0.125996	5.05413	0.948695	0.245333	0
11	ENSDARG00000040261	runx2a	RUNX family transcription factor 2a	0.102883	0.0933449	6.82145	0.907291	0.142754	1.39843e-267
12	ENSDARG00000098012	itgae.1	integrin, alpha E, tandem duplicate 1	0.419959	0.073104	0.282721	0.174074	0.119941	3.28531e-219
12	ENSDARG00000045959	csf3r	colony stimulating factor 3 receptor (granulocyte)	0.367377	0.0700738	0.359205	0.190741	0.123111	3.39082e-225
12	ENSDARG00000103276	fcer1g	Fc fragment of IgE, high affinity I, receptor for; gamma polypeptide	0.346198	0.077574	0.409302	0.224074	0.143038	6.19973e-263
12	ENSDARG00000074846	si:dkeyp-68b7.12	si:dkeyp-68b7.12	0.326764	0.0662605	0.330274	0.202778	0.122984	5.87774e-225
12	ENSDARG00000071437	ptprc	protein tyrosine phosphatase receptor type C	0.313797	0.235057	2.74613	0.749074	0.493212	0
12	ENSDARG00000054447	slc29a1b	solute carrier family 29 member 1b	0.301102	0.075833	0.580108	0.251852	0.131756	1.51365e-241
12	ENSDARG00000017504	si:ch211-1o7.3	si:ch211-1o7.3	0.30051	0.0537022	0.330661	0.178704	0.116081	6.31881e-212
12	ENSDARG00000062349	arhgap15	Rho GTPase activating protein 15	0.295225	0.0776332	0.489464	0.262963	0.147365	3.7495e-271
12	ENSDARG00000000767	spi1b	Spi-1 proto-oncogene b	0.286418	0.0660354	0.452706	0.230556	0.151063	3.47906e-278
12	ENSDARG00000055226	slc7a7	solute carrier family 7 member 7	0.284476	0.054788	0.37357	0.192593	0.120948	4.12963e-221
12	ENSDARG00000089838	si:dkey-262k9.4	si:dkey-262k9.4	0.275135	0.136548	1.24297	0.496296	0.305232	0
12	ENSDARG00000059883	trpv1	transient receptor potential cation channel, subfamily V, member 1	0.268202	0.0576138	0.335458	0.214815	0.112907	6.09455e-206
12	ENSDARG00000008186	syk	spleen tyrosine kinase	0.262008	0.0604074	0.409013	0.230556	0.127556	1.34105e-233
12	ENSDARG00000077249	gmip	GEM interacting protein	0.261338	0.0658183	0.39546	0.251852	0.142788	1.84893e-262
12	ENSDARG00000036104	myo1g	myosin IG	0.260487	0.0663277	0.478186	0.25463	0.146548	1.33742e-269
12	ENSDARG00000043475	tagapb	T cell activation RhoGTPase activating protein b	0.232488	0.0579067	0.421181	0.249074	0.136925	2.44062e-251
12	ENSDARG00000075327	dock10	dedicator of cytokinesis 10	0.216212	0.0642629	0.54693	0.297222	0.119083	1.36785e-217
12	ENSDARG00000017294	gnai2b	guanine nucleotide binding protein (G protein), alpha inhibiting activity polypeptide 2b	0.198516	0.103302	1.31899	0.52037	0.198139	0
12	ENSDARG00000102986	csf1ra	colony stimulating factor 1 receptor, a	0.186151	0.055673	0.761608	0.299074	0.117826	3.22508e-215
12	ENSDARG00000102762	pik3r5	phosphoinositide-3-kinase, regulatory subunit 5	0.184739	0.0542242	0.542419	0.293519	0.145683	5.87116e-268
12	ENSDARG00000002026	qkib	QKI, KH domain containing, RNA binding b	0.164704	0.0559687	0.768305	0.339815	0.102095	1.36325e-185
12	ENSDARG00000074819	si:dkeyp-23e4.3	si:dkeyp-23e4.3	0.158837	0.0751533	2.22142	0.473148	0.141249	1.53593e-259
12	ENSDARG00000102612	slc15a4	solute carrier family 15 member 4	0.146882	0.0678651	1.38812	0.462037	0.115532	6.83672e-211
12	ENSDARG00000016676	gnao1a	guanine nucleotide binding protein (G protein), alpha activating activity polypeptide O, a	0.143396	0.092676	2.35153	0.646296	0.198148	0
12	ENSDARG00000069953	kcnq5b	potassium voltage-gated channel, KQT-like subfamily, member 5b	0.13749	0.06047	1.28382	0.439815	0.106091	4.17363e-193
12	ENSDARG00000034893	rarab	retinoic acid receptor, alpha b	0.137485	0.0963668	2.57528	0.700926	0.204148	0
12	ENSDARG00000021488	cyth1b	cytohesin 1b	0.124951	0.0740451	1.67016	0.592593	0.14457	7.63413e-266
12	ENSDARG00000075793	prex1	phosphatidylinositol-3,4,5-trisphosphate-dependent Rac exchange factor 1	0.117828	0.0687328	1.46978	0.583333	0.121594	2.47938e-222
13	ENSDARG00000089216	zmp:0000001268	zmp:0000001268	0.518011	0.141596	0.576432	0.273346	0.169983	1.24124e-303
13	ENSDARG00000055798	heyl	hes related family bHLH transcription factor with YRPW motif like	0.44485	0.202952	0.794825	0.456226	0.267367	0
13	ENSDARG00000100486	foxo6a	forkhead box O6 a	0.43007	0.186168	1.03675	0.432879	0.225627	0
13	ENSDARG00000069196	ebf1b	EBF transcription factor 1b	0.429454	0.338383	9.74658	0.787938	0.454616	0
13	ENSDARG00000053481	entpd5a	ectonucleoside triphosphate diphosphohydrolase 5a	0.410963	0.194688	1.27804	0.473735	0.254672	0
13	ENSDARG00000056134	c1qtnf5	C1q and TNF related 5	0.391403	0.177807	0.917076	0.45428	0.227991	0
13	ENSDARG00000060532	adam22	ADAM metallopeptidase domain 22	0.364656	0.14118	0.982434	0.38716	0.197894	0
13	ENSDARG00000099034	unc5a	unc-5 netrin receptor A	0.305471	0.217811	4.34836	0.713035	0.346391	0
13	ENSDARG00000016718	mmp11b	matrix metallopeptidase 11b	0.302271	0.116733	3.19476	0.386187	0.110416	1.91366e-194
13	ENSDARG00000034268	slit3	slit homolog 3 (Drosophila)	0.302158	0.258069	7.96271	0.854086	0.422199	0
13	ENSDARG00000010154	vstm4a	V-set and transmembrane domain containing 4a	0.29613	0.119835	0.735192	0.404669	0.178326	0
13	ENSDARG00000039373	epha3	eph receptor A3	0.276044	0.225024	4.52729	0.815175	0.353955	0
13	ENSDARG00000104082	trps1	trichorhinophalangeal syndrome I	0.269895	0.25178	10.7733	0.932879	0.470963	0
13	ENSDARG00000079752	col6a4a	collagen, type VI, alpha 4a	0.237176	0.122972	1.46045	0.518482	0.149222	2.09983e-265
13	ENSDARG00000077188	atrnl1a	attractin-like 1a	0.231493	0.148849	2.8469	0.642996	0.195523	0
13	ENSDARG00000011163	sema3fa	sema domain, immunoglobulin domain (Ig), short basic domain, secreted, (semaphorin) 3Fa	0.231083	0.137796	3.38807	0.596304	0.201752	0
13	ENSDARG00000033327	unc5b	unc-5 netrin receptor B	0.226517	0.179363	3.7445	0.791829	0.294161	0
13	ENSDARG00000060452	sdk2b	sidekick cell adhesion molecule 2b	0.224664	0.124352	1.48254	0.553502	0.193997	0
13	ENSDARG00000024619	foxo6b	forkhead box O6 b	0.223767	0.118196	1.24709	0.52821	0.149673	3.11501e-266
13	ENSDARG00000033978	nxn	nucleoredoxin	0.177276	0.131232	2.4439	0.740272	0.239711	0
13	ENSDARG00000020957	pth1ra	parathyroid hormone 1 receptor a	0.176291	0.152968	4.09354	0.867704	0.235016	0
13	ENSDARG00000075555	adamts17	ADAM metallopeptidase with thrombospondin type 1 motif, 17	0.175937	0.13007	2.46337	0.7393	0.204915	0
13	ENSDARG00000040261	runx2a	RUNX family transcription factor 2a	0.174791	0.1719	13.6058	0.983463	0.344667	0
13	ENSDARG00000069484	dab2ipa	DAB2 interacting protein a	0.172386	0.127277	2.71097	0.738327	0.207364	0
13	ENSDARG00000102478	ADAMTS7		0.170098	0.126581	2.93787	0.744163	0.177843	0
13	ENSDARG00000076292	tns2a	tensin 2a	0.167033	0.117476	2.27427	0.703307	0.231344	0
13	ENSDARG00000004782	fgfr3	fibroblast growth factor receptor 3	0.155322	0.125254	3.0882	0.80642	0.177345	0
13	ENSDARG00000062338	zeb2a	zinc finger E-box binding homeobox 2a	0.151731	0.133724	3.59625	0.881323	0.241659	0
13	ENSDARG00000037196	arid5b	AT-rich interaction domain 5B	0.148223	0.137121	7.25558	0.925097	0.272156	0
13	ENSDARG00000021442	cdh11	cadherin 11, type 2, OB-cadherin (osteoblast)	0.141782	0.126197	5.504	0.890078	0.213796	0
14	ENSDARG00000024488	top2a	DNA topoisomerase II alpha	0.252497	0.0834657	0.434413	0.330561	0.139162	1.10139e-235
14	ENSDARG00000043241	arrb1	arrestin, beta 1	0.231114	0.0975386	0.768419	0.422037	0.12716	1.01328e-214
14	ENSDARG00000091150	mki67	marker of proliferation Ki-67	0.227565	0.0882347	0.584025	0.387734	0.143105	1.3863e-242
14	ENSDARG00000089691	ism2a	isthmin 2a	0.22109	0.0838854	0.596476	0.379418	0.110114	4.83163e-185
14	ENSDARG00000078416	zeb2b	zinc finger E-box binding homeobox 2b	0.214634	0.16421	3.08186	0.765073	0.23426	0
14	ENSDARG00000090785	diaph3	diaphanous-related formin 3	0.191892	0.153593	2.10732	0.800416	0.316936	0
14	ENSDARG00000093413	edil3a	EGF-like repeats and discoidin I-like domains 3a	0.187477	0.145382	5.0572	0.775468	0.196077	0
14	ENSDARG00000028661	cntfr	ciliary neurotrophic factor receptor	0.178381	0.162063	26.499	0.908524	0.216376	0
14	ENSDARG00000098203	APCDD1		0.177803	0.108308	1.37343	0.609148	0.137819	2.45279e-233
14	ENSDARG00000093572	lamc3	laminin, gamma 3	0.176477	0.118141	1.35182	0.669439	0.183066	0
14	ENSDARG00000074082	gpc5c	glypican 5c	0.17001	0.0979062	1.31957	0.575884	0.118282	2.99193e-199
14	ENSDARG00000070494	pdgfra	platelet-derived growth factor receptor, alpha polypeptide	0.167148	0.0952155	1.05488	0.569647	0.119025	1.52093e-200
14	ENSDARG00000071692	prex2	phosphatidylinositol-3,4,5-trisphosphate-dependent Rac exchange factor 2	0.161854	0.109193	2.09934	0.674636	0.161642	4.22008e-275
14	ENSDARG00000069356	adgrl2a	adhesion G protein-coupled receptor L2a	0.161413	0.113257	1.6384	0.701663	0.164911	7.51099e-281
14	ENSDARG00000038428	sulf1	sulfatase 1	0.156568	0.0979769	2.45036	0.62578	0.112453	4.15296e-189
14	ENSDARG00000069954	kcnq5a	potassium voltage-gated channel, KQT-like subfamily, member 5a	0.153639	0.100776	4.10118	0.655925	0.122017	9.34407e-206
14	ENSDARG00000036571	sema3e	sema domain, immunoglobulin domain (Ig), short basic domain, secreted, (semaphorin) 3E	0.151962	0.12653	3.13673	0.83264	0.188029	0
14	ENSDARG00000079068	adam12	ADAM metallopeptidase domain 12	0.145179	0.0913027	1.96747	0.628898	0.116316	7.91107e-196
14	ENSDARG00000059233	runx2b	RUNX family transcription factor 2b	0.142431	0.125552	4.96128	0.881497	0.18927	0
14	ENSDARG00000079850	dchs1b	dachsous cadherin-related 1b	0.139373	0.0883757	1.60944	0.634096	0.114005	8.31253e-192
14	ENSDARG00000102478	ADAMTS7		0.138666	0.0977291	2.24788	0.704782	0.129278	2.04391e-218
14	ENSDARG00000099979	tgfbr3	transforming growth factor, beta receptor III	0.133149	0.125813	6.18067	0.944906	0.20981	0
14	ENSDARG00000038672	tcf7	transcription factor 7	0.132041	0.0910014	2.45784	0.689189	0.10854	2.62338e-182
14	ENSDARG00000062020	gse1	Gse1 coiled-coil protein	0.131454	0.121069	4.91646	0.920998	0.202069	0
14	ENSDARG00000020957	pth1ra	parathyroid hormone 1 receptor a	0.124446	0.0931403	2.59554	0.748441	0.115554	1.67581e-194
14	ENSDARG00000032435	itga9	integrin, alpha 9	0.122345	0.0862263	2.18903	0.704782	0.149942	1.45848e-254
14	ENSDARG00000004782	fgfr3	fibroblast growth factor receptor 3	0.12125	0.0908747	2.2358	0.74948	0.109475	6.23318e-184
14	ENSDARG00000002731	sdc2	syndecan 2	0.118297	0.09481	2.65769	0.801455	0.14486	1.1741e-245
14	ENSDARG00000027041	pcdh17	protocadherin 17	0.117127	0.0854708	3.47298	0.72973	0.144273	1.25295e-244
14	ENSDARG00000040261	runx2a	RUNX family transcription factor 2a	0.11564	0.101936	7.93254	0.881497	0.13571	1.19276e-229
15	ENSDARG00000009242	fev	FEV transcription factor, ETS family member	0.380281	0.101824	0.476013	0.26776	0.179527	7.04764e-296
15	ENSDARG00000070331	muc5.1	mucin 5.1, oligomeric mucus/gel-forming	0.351711	0.31481	14.4043	0.895082	0.610788	0
15	ENSDARG00000017429	sphkap	SPHK1 interactor, AKAP domain containing	0.344456	0.110301	1.1854	0.320219	0.188269	0
15	ENSDARG00000076830	si:dkey-65b12.6	si:dkey-65b12.6	0.336433	0.253336	4.09554	0.753005	0.516746	0
15	ENSDARG00000070480	agr2	anterior gradient 2	0.332408	0.171835	2.253	0.51694	0.327915	0
15	ENSDARG00000058556	muc5.2	mucin 5.2	0.325752	0.32326	52.0793	0.99235	0.783435	0
15	ENSDARG00000025866	ankdd1b	ankyrin repeat and death domain containing 1B	0.325523	0.264332	2.70601	0.812022	0.581565	0
15	ENSDARG00000026296	zgc:112994	zgc:112994	0.324461	0.157798	0.981709	0.486339	0.317861	0
15	ENSDARG00000097416	si:ch73-306e8.2	si:ch73-306e8.2	0.304567	0.104518	0.826496	0.343169	0.219405	0
15	ENSDARG00000076952	fer1l4	fer-1 like family member 4	0.293612	0.226868	2.20763	0.772678	0.52077	0
15	ENSDARG00000070094	sytl1	synaptotagmin-like 1	0.286881	0.0902971	0.539684	0.314754	0.172662	3.38772e-284
15	ENSDARG00000043814	st6galnac1.1	ST6 (alpha-N-acetyl-neuraminyl-2,3-beta-galactosyl-1,3)-N-acetylgalactosaminide alpha-2,6-sialyltransferase 1, tandem duplicate 1	0.282501	0.121336	0.862512	0.429508	0.268338	0
15	ENSDARG00000020981	slc35a3b	solute carrier family 35 member A3b	0.280404	0.0922421	0.576368	0.328962	0.169977	1.23723e-279
15	ENSDARG00000058246	cysltr1	cysteinyl leukotriene receptor 1	0.247992	0.0767014	0.5215	0.30929	0.16989	1.74394e-279
15	ENSDARG00000074697	npdc1a	neural proliferation, differentiation and control, 1a	0.235677	0.122089	1.19413	0.518033	0.289773	0
15	ENSDARG00000054583	mfsd6b	major facilitator superfamily domain containing 6b	0.225135	0.0841487	0.694397	0.37377	0.178299	8.69451e-294
15	ENSDARG00000006112	myof	myoferlin	0.216376	0.158913	1.99491	0.734426	0.324369	0
15	ENSDARG00000013312	cadps2	Ca++-dependent secretion activator 2	0.200327	0.128516	1.53251	0.64153	0.289479	0
15	ENSDARG00000029474	camk1b	calcium/calmodulin-dependent protein kinase Ib	0.189963	0.163181	3.24259	0.859016	0.456001	0
15	ENSDARG00000112644	CU459056.1		0.182095	0.0845795	1.05157	0.464481	0.157945	3.25404e-259
15	ENSDARG00000029480	specc1	sperm antigen with calponin homology and coiled-coil domains 1	0.164219	0.143041	3.6046	0.871038	0.293645	0
15	ENSDARG00000056554	rap1gap	RAP1 GTPase activating protein	0.158179	0.117727	2.13216	0.744262	0.301899	0
15	ENSDARG00000078191	zbtb46	zinc finger and BTB domain containing 46	0.155027	0.0875945	1.33838	0.565027	0.225114	0
15	ENSDARG00000043317	kita	KIT proto-oncogene, receptor tyrosine kinase a	0.14754	0.083364	1.30453	0.565027	0.23024	0
15	ENSDARG00000058237	ssbp3a	single stranded DNA binding protein 3a	0.139438	0.101036	2.13923	0.72459	0.177343	3.68412e-292
15	ENSDARG00000013763	rrbp1a	ribosome binding protein 1a	0.137346	0.0854095	1.54436	0.621858	0.101312	8.2447e-164
15	ENSDARG00000036967	smox	spermine oxidase	0.135344	0.078692	1.39777	0.581421	0.0980375	2.50003e-158
15	ENSDARG00000102335	ano1	anoctamin 1, calcium activated chloride channel	0.126092	0.0961882	2.71706	0.762842	0.136737	2.36715e-223
15	ENSDARG00000019420	etnk1	ethanolamine kinase 1	0.114914	0.0928104	3.13675	0.80765	0.141658	1.1671e-231
15	ENSDARG00000079097	tanc2a	tetratricopeptide repeat, ankyrin repeat and coiled-coil containing 2a	0.108266	0.0827084	2.53718	0.763934	0.163998	1.7637e-269
16	ENSDARG00000027088	ptgdsb.1	prostaglandin D2 synthase b, tandem duplicate 1	0.517819	0.490239	8.09595	0.946738	0.65128	0
16	ENSDARG00000092283	cxl34b.11	CX chemokine ligand 34b, duplicate 11	0.432893	0.203477	0.535591	0.47004	0.22281	0
16	ENSDARG00000071626	ptgdsb.2	prostaglandin D2 synthase b, tandem duplicate 2	0.430287	0.32028	1.91424	0.744341	0.405524	0
16	ENSDARG00000040295	apoeb	apolipoprotein Eb	0.411156	0.353123	3.71342	0.858855	0.444736	0
16	ENSDARG00000088091	pfn1	profilin 1	0.381502	0.339339	2.28135	0.889481	0.501033	0
16	ENSDARG00000039579	cfd	complement factor D (adipsin)	0.355219	0.337246	5.168	0.949401	0.452776	0
16	ENSDARG00000040045	cldn1	claudin 1	0.349331	0.14885	0.354434	0.426099	0.174593	3.79301e-249
16	ENSDARG00000036840	krt15	keratin 15	0.345024	0.270138	6.03321	0.782956	0.298804	0
16	ENSDARG00000035018	thy1	Thy-1 cell surface antigen	0.311118	0.186836	0.720023	0.600533	0.242344	0
16	ENSDARG00000054616	cldni	claudin i	0.285832	0.271369	2.50079	0.949401	0.471347	0
16	ENSDARG00000077777	tmsb4x	thymosin beta 4 X-linked	0.279922	0.271722	4.43017	0.970706	0.483034	0
16	ENSDARG00000095533	si:ch211-198c19.3	si:ch211-198c19.3	0.276759	0.196421	1.2426	0.70972	0.286401	0
16	ENSDARG00000101199	rbp4	retinol binding protein 4, plasma	0.271965	0.258928	6.64915	0.952064	0.465839	0
16	ENSDARG00000074132	scpp7	secretory calcium-binding phosphoprotein 7	0.262521	0.212534	25.3538	0.809587	0.258789	0
16	ENSDARG00000037746	actb1	actin, beta 1	0.259547	0.256783	9.26386	0.989348	0.424102	0
16	ENSDARG00000090268	krtt1c19e	keratin type 1 c19e	0.233764	0.167464	2.65607	0.716378	0.185491	3.18844e-265
16	ENSDARG00000033466	tagln2	transgelin 2	0.216328	0.155837	0.90678	0.720373	0.23552	0
16	ENSDARG00000026829	cotl1	coactosin-like F-actin binding protein 1	0.208759	0.159836	1.04396	0.765646	0.261737	0
16	ENSDARG00000022615	si:ch211-241e1.3	si:ch211-241e1.3	0.207252	0.179655	2.0068	0.866844	0.311124	0
16	ENSDARG00000063295	myh9a	myosin, heavy chain 9a, non-muscle	0.201188	0.187794	2.60317	0.933422	0.367351	0
16	ENSDARG00000074201	flna	filamin A, alpha (actin binding protein 280)	0.198674	0.194441	4.20291	0.978695	0.421116	0
16	ENSDARG00000019353	sparc	secreted protein, acidic, cysteine-rich (osteonectin)	0.195337	0.190135	7.93038	0.973369	0.361405	0
16	ENSDARG00000058371	krt5	keratin 5	0.195208	0.195208	42.8366	1	0.313382	0
16	ENSDARG00000104181	tmsb1	thymosin beta 1	0.194875	0.152838	1.48333	0.784288	0.204883	6.52172e-294
16	ENSDARG00000028507	itgb4	integrin, beta 4	0.193175	0.192918	14.202	0.998668	0.478329	0
16	ENSDARG00000069946	itga6b	integrin, alpha 6b	0.184782	0.183552	7.85512	0.993342	0.415133	0
16	ENSDARG00000037870	actb2	actin, beta 2	0.183732	0.180796	6.2054	0.984021	0.255411	0
16	ENSDARG00000012972	cfl1l	cofilin 1 (non-muscle), like	0.183703	0.153127	1.63298	0.833555	0.171836	4.37699e-245
16	ENSDARG00000103747	cav1	caveolin 1	0.178896	0.158886	2.13285	0.888149	0.254479	0
16	ENSDARG00000035809	col1a1b	collagen, type I, alpha 1b	0.147734	0.145374	21.3141	0.984021	0.252141	0
17	ENSDARG00000060345	apoda.1	apolipoprotein Da, duplicate 1	0.490193	0.258068	1.47511	0.526462	0.393713	0
17	ENSDARG00000039181	trpm3	transient receptor potential cation channel, subfamily M, member 3	0.488061	0.286175	1.83208	0.586351	0.416788	0
17	ENSDARG00000062688	gpnmb	glycoprotein (transmembrane) nmb	0.485193	0.457487	5.39602	0.942897	0.765128	0
17	ENSDARG00000003991	fhl2b	four and a half LIM domains 2b	0.478638	0.330647	7.9157	0.690808	0.512357	0
17	ENSDARG00000042018	fhl2a	four and a half LIM domains 2a	0.473136	0.367043	3.95387	0.775766	0.605763	0
17	ENSDARG00000033201	zgc:101840	zgc:101840	0.469332	0.254276	1.32888	0.541783	0.402659	0
17	ENSDARG00000091792	akap12a	A kinase (PRKA) anchor protein 12a	0.435348	0.380172	4.73024	0.873259	0.656204	0
17	ENSDARG00000053709	si:ch73-89b15.3	si:ch73-89b15.3	0.424712	0.188104	0.744167	0.442897	0.304366	0
17	ENSDARG00000113438	CR318624.2		0.424345	0.177303	0.733567	0.417827	0.306781	0
17	ENSDARG00000074442	alx4b	ALX homeobox 4b	0.424341	0.377651	3.59717	0.889972	0.617181	0
17	ENSDARG00000055172	si:ch211-256m1.8	si:ch211-256m1.8	0.416414	0.208787	0.897541	0.501393	0.355435	0
17	ENSDARG00000037046	rad51b	RAD51 paralog B	0.4164	0.194861	2.49229	0.467967	0.273343	0
17	ENSDARG00000057575	pnp4a	purine nucleoside phosphorylase 4a	0.412139	0.288153	2.01919	0.699164	0.505204	0
17	ENSDARG00000016835	tcirg1a	T cell immune regulator 1, ATPase H+ transporting V0 subunit a3a	0.40757	0.214003	1.08272	0.52507	0.343177	0
17	ENSDARG00000075161	defbl1	defensin, beta-like 1	0.400292	0.189553	1.08104	0.473538	0.318256	0
17	ENSDARG00000010727	ttyh2l	tweety homolog 2, like	0.376763	0.294903	2.39353	0.78273	0.546665	0
17	ENSDARG00000017880	kcnip3b	Kv channel interacting protein 3b, calsenilin	0.373834	0.180148	1.4492	0.481894	0.313436	0
17	ENSDARG00000097804	lypc	ly6 domain containing, pigment cell	0.340258	0.173446	1.11837	0.509749	0.353172	0
17	ENSDARG00000075343	csf1a	colony stimulating factor 1a (macrophage)	0.32971	0.174499	1.52374	0.529248	0.299409	0
17	ENSDARG00000088332	alx4a	ALX homeobox 4a	0.328642	0.294313	4.24193	0.895543	0.472449	0
17	ENSDARG00000029894	slc2a15a	solute carrier family 2 member 15a	0.317641	0.176959	1.1383	0.557103	0.303887	0
17	ENSDARG00000045749	ppfibp1a	PPFIA binding protein 1a	0.315971	0.169867	1.09738	0.537604	0.310954	0
17	ENSDARG00000042861	ltk	leukocyte receptor tyrosine kinase	0.315384	0.258281	3.17049	0.818942	0.431678	0
17	ENSDARG00000063068	syne1b	spectrin repeat containing, nuclear envelope 1b	0.311408	0.202112	2.50637	0.649025	0.349122	0
17	ENSDARG00000075436	sytl2b	synaptotagmin-like 2b	0.304498	0.234523	2.59908	0.770195	0.465024	0
17	ENSDARG00000006508	pip5k1bb	phosphatidylinositol-4-phosphate 5-kinase, type I, beta b	0.252513	0.192022	3.2079	0.760446	0.410371	0
17	ENSDARG00000024276	pcbp4	poly(rC) binding protein 4	0.248515	0.235709	6.44774	0.948468	0.555082	0
17	ENSDARG00000103476	trpm1b	transient receptor potential cation channel, subfamily M, member 1b	0.221077	0.197676	3.32557	0.89415	0.463733	0
17	ENSDARG00000073869	pdzrn3b	PDZ domain containing RING finger 3b	0.214593	0.170061	2.80853	0.792479	0.326517	0
17	ENSDARG00000062003	myo5b	myosin VB	0.197542	0.180759	4.63089	0.915042	0.393039	0
18	ENSDARG00000086669	edn3b	endothelin 3b	0.318148	0.136349	1.60808	0.428571	0.248843	0
18	ENSDARG00000020031	cldn11a	claudin 11a	0.294385	0.121544	0.808834	0.412873	0.24297	0
18	ENSDARG00000036809	si:ch211-106j24.1	si:ch211-106j24.1	0.285534	0.155542	1.45495	0.544741	0.29054	0
18	ENSDARG00000034300	sema3c	sema domain, immunoglobulin domain (Ig), short basic domain, secreted, (semaphorin) 3C	0.272402	0.131711	1.41808	0.483516	0.22681	7.83307e-289
18	ENSDARG00000089913	cacna1g	calcium channel, voltage-dependent, T type, alpha 1G subunit	0.258255	0.249336	8.02	0.965463	0.548535	0
18	ENSDARG00000060893	col8a2	collagen, type VIII, alpha 2	0.25754	0.11563	1.26078	0.44898	0.190234	7.32886e-241
18	ENSDARG00000073810	thbs2b	thrombospondin 2b	0.254572	0.137877	1.56872	0.541601	0.259632	0
18	ENSDARG00000009014	col11a1b	collagen, type XI, alpha 1b	0.233464	0.216605	5.58945	0.927786	0.476777	0
18	ENSDARG00000029402	sort1a	sortilin 1a	0.233368	0.123462	1.13083	0.529042	0.238895	9.55201e-305
18	ENSDARG00000068263	csf1b	colony stimulating factor 1b (macrophage)	0.231428	0.133335	1.42934	0.576138	0.254134	0
18	ENSDARG00000074075	antxr1b	ANTXR cell adhesion molecule 1b	0.231058	0.114622	1.05656	0.496075	0.217562	1.12439e-276
18	ENSDARG00000019601	col12a1b	collagen, type XII, alpha 1b	0.23009	0.218531	11.2671	0.949765	0.485088	0
18	ENSDARG00000099371	cygb1	cytoglobin 1	0.226444	0.152503	1.98917	0.673469	0.26271	0
18	ENSDARG00000045580	lum	lumican	0.215224	0.139541	2.78413	0.648352	0.252795	0
18	ENSDARG00000078717	itga8	integrin, alpha 8	0.212032	0.175084	3.65042	0.825746	0.335087	0
18	ENSDARG00000052615	tnmd	tenomodulin	0.202085	0.121822	1.58268	0.602826	0.221435	9.17461e-282
18	ENSDARG00000001733	gulp1a	GULP PTB domain containing engulfment adaptor 1a	0.194639	0.153083	2.54387	0.786499	0.281997	0
18	ENSDARG00000006921	lrp5	low density lipoprotein receptor-related protein 5	0.186555	0.152876	3.21402	0.819466	0.314376	0
18	ENSDARG00000104267	postnb	periostin, osteoblast specific factor b	0.184925	0.164313	5.99293	0.88854	0.321848	0
18	ENSDARG00000109820	NPAS3		0.172113	0.12564	2.3377	0.729984	0.226508	1.95728e-288
18	ENSDARG00000074335	boc	BOC cell adhesion associated, oncogene regulated	0.171617	0.125547	2.17216	0.731554	0.210502	2.08634e-267
18	ENSDARG00000097827	lrp1aa	low density lipoprotein receptor-related protein 1Aa	0.167988	0.118673	1.77018	0.706436	0.200121	8.46074e-254
18	ENSDARG00000012066	dcn	decorin	0.167948	0.118117	1.9717	0.703297	0.195068	3.48515e-247
18	ENSDARG00000078322	col12a1a	collagen, type XII, alpha 1a	0.161834	0.145067	5.97166	0.896389	0.255475	0
18	ENSDARG00000098954	stard13b	StAR-related lipid transfer (START) domain containing 13b	0.159484	0.124933	4.64378	0.783359	0.221259	1.56237e-281
18	ENSDARG00000077139	col6a3	collagen, type VI, alpha 3	0.150722	0.124458	3.02262	0.825746	0.213809	9.53259e-272
18	ENSDARG00000075608	mical2a	microtubule associated monooxygenase, calponin and LIM domain containing 2a	0.145816	0.11354	2.50331	0.77865	0.199136	1.64785e-252
18	ENSDARG00000012405	col1a1a	collagen, type I, alpha 1a	0.141427	0.135433	11.3958	0.957614	0.227003	4.36486e-289
18	ENSDARG00000020007	col1a2	collagen, type I, alpha 2	0.134432	0.131055	12.5438	0.974882	0.233073	4.47462e-297
18	ENSDARG00000035809	col1a1b	collagen, type I, alpha 1b	0.121071	0.11879	16.4455	0.981162	0.206877	1.18401e-262
19	ENSDARG00000075191	oacyl	O-acyltransferase like	0.726382	0.273555	0.840393	0.3766	0.281532	0
19	ENSDARG00000056028	slc22a7a	solute carrier family 22 member 7a	0.724077	0.489778	1.75284	0.676417	0.543196	0
19	ENSDARG00000071475	aox5	aldehyde oxidase 5	0.70096	0.465171	1.67765	0.66362	0.524804	0
19	ENSDARG00000076844	plin6	perilipin 6	0.700022	0.550292	3.56325	0.786106	0.609944	0
19	ENSDARG00000025912	bscl2l	BSCL2 lipid droplet biogenesis associated, seipin, like	0.691172	0.476365	1.61917	0.689214	0.533577	0
19	ENSDARG00000063288	slc2a11b	solute carrier family 2 member 11b	0.687817	0.597282	3.25836	0.868373	0.707436	0
19	ENSDARG00000058553	sprb	sepiapterin reductase b	0.682113	0.234437	0.97591	0.343693	0.249906	2.11545e-284
19	ENSDARG00000045601	cax1	cation/H+ exchanger protein 1	0.665609	0.181308	0.364319	0.272395	0.199227	4.75195e-225
19	ENSDARG00000075803	slc41a2a	solute carrier family 41 member 2a	0.643358	0.190537	0.41712	0.296161	0.210871	1.20163e-238
19	ENSDARG00000070818	pax7b	paired box 7b	0.590162	0.556716	10.1858	0.943327	0.739615	0
19	ENSDARG00000114516	CABZ01021592.1		0.5839	0.306361	1.46731	0.52468	0.35293	0
19	ENSDARG00000101557	scarb1	scavenger receptor class B, member 1	0.575108	0.445788	2.22205	0.775137	0.548294	0
19	ENSDARG00000062297	soat1	sterol O-acyltransferase 1	0.561265	0.309876	1.12422	0.552102	0.376166	0
19	ENSDARG00000100398	pax7a	paired box 7a	0.539601	0.489291	10.2637	0.906764	0.628831	0
19	ENSDARG00000104256	bco1	beta-carotene oxygenase 1	0.526683	0.414992	2.94548	0.787934	0.540314	0
19	ENSDARG00000070110	opn5	opsin 5	0.520612	0.236036	0.74351	0.453382	0.30234	0
19	ENSDARG00000076250	rasef	RAS and EF-hand domain containing	0.474262	0.318198	1.50359	0.670932	0.447662	0
19	ENSDARG00000102986	csf1ra	colony stimulating factor 1 receptor, a	0.436239	0.338145	2.32106	0.775137	0.477509	0
19	ENSDARG00000062415	ctnnd2a	catenin (cadherin-associated protein), delta 2a	0.414289	0.312042	3.11267	0.753199	0.464291	0
19	ENSDARG00000109358	trhde.2	thyrotropin releasing hormone degrading enzyme, tandem duplicate 2	0.408259	0.229879	1.77025	0.563071	0.290206	0
19	ENSDARG00000053269	slc2a15b	solute carrier family 2 member 15b	0.405418	0.233467	1.32526	0.575868	0.351953	0
19	ENSDARG00000088168	ablim3	actin binding LIM protein family, member 3	0.392171	0.320476	2.63347	0.817185	0.511255	0
19	ENSDARG00000031348	mc5ra	melanocortin 5a receptor	0.379172	0.260638	2.56829	0.687386	0.395501	0
19	ENSDARG00000029894	slc2a15a	solute carrier family 2 member 15a	0.374243	0.229198	1.40924	0.612431	0.339477	0
19	ENSDARG00000061635	myo5aa	myosin VAa	0.358314	0.31246	3.47992	0.872029	0.536945	0
19	ENSDARG00000058699	tmeff2b	transmembrane protein with EGF-like and two follistatin-like domains 2b	0.350693	0.312226	5.15861	0.890311	0.548716	0
19	ENSDARG00000070991	mlpha	melanophilin a	0.336951	0.195272	1.32157	0.579525	0.320699	0
19	ENSDARG00000103476	trpm1b	transient receptor potential cation channel, subfamily M, member 1b	0.305972	0.287513	5.11009	0.939671	0.565201	0
19	ENSDARG00000101145	lipeb	lipase, hormone-sensitive b	0.289376	0.199442	2.15653	0.689214	0.300175	0
19	ENSDARG00000109783	igsf11	immunoglobulin superfamily member 11	0.253392	0.238569	5.05775	0.941499	0.494703	0
20	ENSDARG00000052027	tspan1	tetraspanin 1	0.696092	0.205299	0.911431	0.294931	0.212309	7.87299e-201
20	ENSDARG00000062319	si:dkey-103g5.3	si:dkey-103g5.3	0.668185	0.290984	1.66392	0.435484	0.314661	1.58335e-301
20	ENSDARG00000079119	si:ch211-229d2.5	si:ch211-229d2.5	0.649904	0.119798	0.668727	0.184332	0.126821	1.0893e-117
20	ENSDARG00000092552	fndc7rs2	fibronectin type III domain containing 7, related sequence 2	0.648076	0.167245	0.453386	0.258065	0.183538	9.38941e-173
20	ENSDARG00000105061	si:ch73-261i21.5	si:ch73-261i21.5	0.64622	0.148899	0.947894	0.230415	0.15475	9.2697e-145
20	ENSDARG00000019063	fat1b	FAT atypical cadherin 1b	0.57007	0.345457	2.10373	0.605991	0.397731	0
20	ENSDARG00000092469	fndc7rs1	fibronectin type III domain containing 7, related sequence 1	0.552548	0.140047	0.450259	0.253456	0.170576	3.87845e-160
20	ENSDARG00000108006	CU693481.1		0.481548	0.171982	0.737484	0.357143	0.231987	4.33044e-220
20	ENSDARG00000088315	si:ch211-103f14.3	si:ch211-103f14.3	0.387328	0.200803	1.74887	0.518433	0.302789	8.83739e-290
20	ENSDARG00000099283	epb41a	erythrocyte membrane protein band 4.1a	0.372938	0.220841	1.6804	0.592166	0.313694	1.43399e-300
20	ENSDARG00000070522	cacna1i		0.363498	0.129821	1.07581	0.357143	0.165546	3.02058e-155
20	ENSDARG00000058284	CT990561.1		0.354397	0.169032	1.34792	0.476959	0.237241	3.06026e-225
20	ENSDARG00000000161	itsn2a	intersectin 2a	0.329173	0.166862	1.26773	0.506912	0.256966	1.31989e-244
20	ENSDARG00000075864	igsf9a	immunoglobulin superfamily, member 9a	0.323814	0.202197	1.50222	0.624424	0.356856	0
20	ENSDARG00000089643	mcama	melanoma cell adhesion molecule a	0.323105	0.124328	1.11083	0.384793	0.144098	2.00394e-134
20	ENSDARG00000062854	sdk1b	sidekick cell adhesion molecule 1b	0.319828	0.248346	2.89927	0.776498	0.358199	0
20	ENSDARG00000014259	eya1	EYA transcriptional coactivator and phosphatase 1	0.311387	0.288428	6.82855	0.926267	0.551302	0
20	ENSDARG00000033498	rorb	RAR-related orphan receptor B	0.296656	0.13329	1.707	0.449309	0.223866	3.89118e-212
20	ENSDARG00000099923	zgc:154054	zgc:154054	0.285198	0.116314	1.00601	0.407834	0.165473	3.55351e-155
20	ENSDARG00000070903	met	MET proto-oncogene, receptor tyrosine kinase	0.276207	0.14765	1.63244	0.534562	0.19557	1.74943e-184
20	ENSDARG00000043242	si:dkey-222f2.1	si:dkey-222f2.1	0.273086	0.116408	0.927954	0.426267	0.214751	3.22754e-203
20	ENSDARG00000012397	eya4	EYA transcriptional coactivator and phosphatase 4	0.256062	0.188802	2.12469	0.737327	0.351125	0
20	ENSDARG00000079253	plch1	phospholipase C, eta 1	0.254957	0.105743	0.864346	0.414747	0.201422	3.39921e-190
20	ENSDARG00000077002	igsf3	immunoglobulin superfamily, member 3	0.24994	0.181984	3.69296	0.728111	0.312621	1.65693e-299
20	ENSDARG00000046150	b4galnt4a	beta-1,4-N-acetyl-galactosaminyl transferase 4a	0.241992	0.119881	1.17921	0.495392	0.200347	3.81286e-189
20	ENSDARG00000090830	tmem132e	transmembrane protein 132E	0.217662	0.158482	2.37755	0.728111	0.23628	2.67958e-224
20	ENSDARG00000103479	ptprfa	protein tyrosine phosphatase receptor type Fa	0.191655	0.147053	2.77679	0.767281	0.244997	7.53476e-233
20	ENSDARG00000010132	dacha	dachshund a	0.190731	0.114702	1.66615	0.601382	0.210968	1.61166e-199
20	ENSDARG00000052061	col4a6	collagen, type IV, alpha 6	0.186357	0.102196	1.38312	0.548387	0.137423	5.90807e-128
20	ENSDARG00000101081	ptprub	protein tyrosine phosphatase receptor type Ub	0.15378	0.141024	4.86427	0.917051	0.260413	5.38372e-248
21	ENSDARG00000069046	wu:fk65c09	wu:fk65c09	0.418656	0.065477	1.88908	0.156398	0.0627201	1.35485e-54
21	ENSDARG00000104016	si:dkey-151j17.4	si:dkey-151j17.4	0.414364	0.0756067	2.04373	0.182464	0.070376	8.39481e-62
21	ENSDARG00000089885	slc16a12b	solute carrier family 16 member 12b	0.100565	0.0397971	0.970539	0.395735	0.0162709	7.18058e-11
22	ENSDARG00000110748	CABZ01056052.1		0.422671	0.147199	0.655758	0.348259	0.219518	1.07341e-195
22	ENSDARG00000091116	pkhd1l1	polycystic kidney and hepatic disease 1 (autosomal recessive)-like 1	0.400298	0.0876274	0.64186	0.218905	0.108766	2.83386e-94
22	ENSDARG00000041413	adgrg11	adhesion G protein-coupled receptor G11	0.392153	0.368741	5.25393	0.940299	0.650241	0
22	ENSDARG00000075855	adgre10	adhesion G protein-coupled receptor E10	0.374755	0.126783	0.646739	0.338308	0.210337	3.06301e-187
22	ENSDARG00000087870	adgrf3a	adhesion G protein-coupled receptor F3a	0.362614	0.297668	2.83784	0.820896	0.523796	0
22	ENSDARG00000038968	ccr6b	chemokine (C-C motif) receptor 6b	0.325344	0.104401	0.559751	0.320896	0.185796	1.10716e-164
22	ENSDARG00000057273	alox5a	arachidonate 5-lipoxygenase a	0.311525	0.172036	1.43493	0.552239	0.298165	1.68291e-268
22	ENSDARG00000055302	grid2	glutamate receptor, ionotropic, delta 2	0.301363	0.10945	3.08633	0.363184	0.15329	6.72848e-135
22	ENSDARG00000069463	alox12	arachidonate 12-lipoxygenase	0.275141	0.169055	1.46026	0.614428	0.284535	7.79036e-256
22	ENSDARG00000020656	prkg1a	protein kinase cGMP-dependent 1a	0.271896	0.171795	1.61879	0.631841	0.274835	7.81662e-247
22	ENSDARG00000079826	gpr174	G protein-coupled receptor 174	0.268297	0.0860952	0.540397	0.320896	0.153305	6.52143e-135
22	ENSDARG00000096662	abcc3	ATP-binding cassette, sub-family C (CFTR/MRP), member 3	0.263608	0.236723	4.14305	0.89801	0.483522	0
22	ENSDARG00000037782	sox8b	SRY (sex determining region Y)-box 8b	0.259387	0.0922694	0.658248	0.355721	0.173275	3.38342e-153
22	ENSDARG00000012555	ak5	adenylate kinase 5	0.245077	0.126806	1.34933	0.517413	0.228889	2.46171e-204
22	ENSDARG00000098652	pcdh11	protocadherin 11	0.236993	0.10199	1.30336	0.430348	0.156446	8.72633e-138
22	ENSDARG00000078749	b4galnt3a	beta-1,4-N-acetyl-galactosaminyl transferase 3a	0.227335	0.110274	1.11125	0.485075	0.192723	4.82341e-171
22	ENSDARG00000087804	tnfrsf11a	tumor necrosis factor receptor superfamily, member 11a, NFKB activator	0.220406	0.161741	2.89854	0.733831	0.22798	1.69559e-203
22	ENSDARG00000001414	mctp2a	multiple C2 domains, transmembrane 2a	0.218652	0.092465	1.00353	0.422886	0.0849193	1.36706e-72
22	ENSDARG00000043010	camk2d1	calcium/calmodulin-dependent protein kinase (CaM kinase) II delta 1	0.21377	0.172824	3.64082	0.808458	0.312915	3.13111e-282
22	ENSDARG00000068763	plcg2	phospholipase C, gamma 2	0.213307	0.0955106	0.87172	0.447761	0.203455	6.58652e-181
22	ENSDARG00000099902	il17rc	interleukin 17 receptor C	0.207889	0.101876	1.40685	0.49005	0.117237	5.46428e-102
22	ENSDARG00000074311	mast2	microtubule associated serine/threonine kinase 2	0.194447	0.167843	4.0744	0.863184	0.342252	0
22	ENSDARG00000004115	mgat4b	alpha-1,3-mannosyl-glycoprotein 4-beta-N-acetylglucosaminyltransferase B	0.192702	0.139014	5.49035	0.721393	0.22169	1.06834e-197
22	ENSDARG00000061796	rasgrp4	RAS guanyl releasing protein 4	0.180604	0.0934469	1.07245	0.517413	0.159821	7.11336e-141
22	ENSDARG00000052387	pou2f3	POU class 2 homeobox 3	0.1621	0.127422	2.36844	0.78607	0.316892	6.15726e-286
22	ENSDARG00000041339	zgc:92380	zgc:92380	0.154303	0.100182	1.65956	0.649254	0.231947	3.71459e-207
22	ENSDARG00000068760	tnks1bp1	tankyrase 1 binding protein 1	0.146344	0.0961065	1.81308	0.656716	0.119295	7.29201e-104
22	ENSDARG00000062190	PDE3B		0.145258	0.107679	2.41727	0.741294	0.190249	9.04112e-169
22	ENSDARG00000060813	plekha7a	pleckstrin homology domain containing, family A member 7a	0.132113	0.0808455	1.51388	0.61194	0.132815	3.41289e-116
23	ENSDARG00000075598	ambn	ameloblastin	0.753012	0.150196	0.41474	0.199461	0.139815	6.01412e-115
23	ENSDARG00000092580	si:ch211-95j8.3	si:ch211-95j8.3	0.659587	0.240011	0.867193	0.363881	0.23144	6.38261e-194
23	ENSDARG00000093659	entpd5b	ectonucleoside triphosphate diphosphohydrolase 5b	0.65276	0.182984	0.969539	0.280323	0.171263	5.73935e-142
23	ENSDARG00000069216	c6ast1	six-cysteine containing astacin protease 1	0.64949	0.444665	5.98964	0.684636	0.421166	0
23	ENSDARG00000074002	slc6a11a	solute carrier family 6 member 11a	0.544565	0.10128	0.355306	0.185984	0.102822	2.86732e-83
23	ENSDARG00000010423	npsn	nephrosin	0.46877	0.132671	0.474052	0.283019	0.142328	4.2008e-117
23	ENSDARG00000011956	dlx4a	distal-less homeobox 4a	0.44558	0.122504	0.444587	0.274933	0.123688	4.00401e-101
23	ENSDARG00000092730	enam	enamelin	0.383974	0.297036	21.5615	0.773585	0.249641	1.05957e-209
23	ENSDARG00000068288	lamc2	laminin, gamma 2	0.314824	0.216388	2.01481	0.687332	0.270759	4.74863e-228
23	ENSDARG00000022615	si:ch211-241e1.3	si:ch211-241e1.3	0.305369	0.242814	3.34996	0.795148	0.308251	9.89053e-261
23	ENSDARG00000102911	iffo2b	intermediate filament family orphan 2b	0.273588	0.1438	0.899194	0.525606	0.183942	6.91934e-153
23	ENSDARG00000074132	scpp7	secretory calcium-binding phosphoprotein 7	0.241869	0.210576	22.7482	0.87062	0.204994	4.76828e-171
23	ENSDARG00000087873	eevs	2-epi-5-epi-valiolone synthase	0.218116	0.116995	0.875112	0.536388	0.139831	5.82424e-115
23	ENSDARG00000020541	ism1	isthmin 1	0.214372	0.105742	0.969583	0.493261	0.12695	6.43987e-104
23	ENSDARG00000040295	apoeb	apolipoprotein Eb	0.209639	0.103407	1.53587	0.493261	0.114056	7.05667e-93
23	ENSDARG00000027088	ptgdsb.1	prostaglandin D2 synthase b, tandem duplicate 1	0.198771	0.100725	2.3523	0.506739	0.115471	4.34121e-94
23	ENSDARG00000079011	col17a1b	collagen, type XVII, alpha 1b	0.193063	0.156115	2.72359	0.808625	0.215759	2.37697e-180
23	ENSDARG00000115101	LHFPL6		0.18275	0.106891	1.69572	0.584906	0.144765	3.4008e-119
23	ENSDARG00000058543	lama5	laminin, alpha 5	0.171185	0.105203	1.57683	0.614555	0.123465	6.21549e-101
23	ENSDARG00000077818	nrg2a	neuregulin 2a	0.169238	0.12134	1.94358	0.716981	0.152801	4.28707e-126
23	ENSDARG00000059233	runx2b	RUNX family transcription factor 2b	0.139636	0.101998	4.83453	0.730458	0.0823186	9.32658e-66
23	ENSDARG00000079388	agrn	agrin	0.137937	0.128271	5.68551	0.929919	0.197191	2.59946e-164
23	ENSDARG00000069989	bnc2	basonuclin 2	0.137856	0.12002	3.7353	0.87062	0.199369	3.43037e-166
23	ENSDARG00000043010	camk2d1	calcium/calmodulin-dependent protein kinase (CaM kinase) II delta 1	0.133633	0.101575	1.96358	0.760108	0.197437	1.59515e-164
23	ENSDARG00000030107	si:ch211-207i1.2	si:ch211-207i1.2	0.125832	0.107517	3.40277	0.854447	0.137728	3.70856e-113
23	ENSDARG00000052242	aff2	AF4/FMR2 family, member 2	0.122141	0.0971201	4.45378	0.795148	0.133433	1.78878e-109
23	ENSDARG00000069946	itga6b	integrin, alpha 6b	0.118022	0.103389	4.37022	0.876011	0.131302	1.2001e-107
23	ENSDARG00000044356	tp63	tumor protein p63	0.11487	0.0987697	2.80199	0.859838	0.128514	2.93844e-105
23	ENSDARG00000028507	itgb4	integrin, beta 4	0.112376	0.109953	6.99349	0.978437	0.169989	7.16415e-141
23	ENSDARG00000062579	kremen1	kringle containing transmembrane protein 1	0.111128	0.105737	12.8284	0.951482	0.130165	1.13234e-106
24	ENSDARG00000011076	zgc:91968	zgc:91968	0.704558	0.198289	0.320106	0.281437	0.193798	2.56193e-148
24	ENSDARG00000061303	oca2	oculocutaneous albinism II	0.702705	0.315586	2.28467	0.449102	0.301909	1.31621e-234
24	ENSDARG00000100917	slc30a8	solute carrier family 30 member 8	0.669753	0.186488	0.36403	0.278443	0.18367	2.78688e-140
24	ENSDARG00000056151	tyrp1b	tyrosinase-related protein 1b	0.651707	0.376585	3.03116	0.577844	0.391083	1.68826e-306
24	ENSDARG00000091298	pmela	premelanosome protein a	0.65004	0.346428	1.52813	0.532934	0.353163	7.58227e-276
24	ENSDARG00000036117	mchr2	melanin-concentrating hormone receptor 2	0.646127	0.193451	0.355313	0.299401	0.192524	2.62881e-147
24	ENSDARG00000017466	ncam2	neural cell adhesion molecule 2	0.608731	0.406428	7.52683	0.667665	0.419023	0
24	ENSDARG00000103800	prkar1b	protein kinase, cAMP-dependent, regulatory, type I, beta	0.548981	0.443787	5.22832	0.808383	0.534464	0
24	ENSDARG00000101586	si:ch73-389b16.1	si:ch73-389b16.1	0.526241	0.338748	1.63071	0.643713	0.407337	0
24	ENSDARG00000008861	tfap2e	transcription factor AP-2 epsilon	0.501693	0.201278	0.666184	0.401198	0.22968	7.45566e-177
24	ENSDARG00000115903	KIRREL3		0.495465	0.275918	1.23634	0.556886	0.305512	1.68698e-237
24	ENSDARG00000070991	mlpha	melanophilin a	0.439404	0.321002	1.85699	0.730539	0.408595	0
24	ENSDARG00000034757	zdhhc2	zinc finger, DHHC-type containing 2	0.437008	0.236822	0.94711	0.541916	0.297196	7.95941e-231
24	ENSDARG00000061692	yjefn3	YjeF N-terminal domain containing 3	0.436248	0.24294	1.65453	0.556886	0.316962	1.07137e-246
24	ENSDARG00000005823	slc39a10	solute carrier family 39 member 10	0.421577	0.174184	0.830347	0.413174	0.194379	8.85954e-149
24	ENSDARG00000069765	syngap1b	synaptic Ras GTPase activating protein 1b	0.39997	0.296984	2.45907	0.742515	0.411261	0
24	ENSDARG00000010192	pax3a	paired box 3a	0.382715	0.210837	1.33694	0.550898	0.284191	2.11637e-220
24	ENSDARG00000053269	slc2a15b	solute carrier family 2 member 15b	0.372052	0.169317	1.18716	0.45509	0.222616	3.14747e-171
24	ENSDARG00000059832	adgrb3	adhesion G protein-coupled receptor B3	0.347081	0.215107	2.75639	0.61976	0.301786	1.65384e-234
24	ENSDARG00000078142	SPAG9		0.339949	0.225954	2.27953	0.664671	0.305708	1.17452e-237
24	ENSDARG00000031348	mc5ra	melanocortin 5a receptor	0.329082	0.1941	2.13665	0.58982	0.262079	1.04378e-202
24	ENSDARG00000063180	dock3	dedicator of cytokinesis 3	0.328123	0.203358	1.35264	0.61976	0.271246	4.87558e-210
24	ENSDARG00000043317	kita	KIT proto-oncogene, receptor tyrosine kinase a	0.319201	0.247524	3.60988	0.775449	0.400006	0
24	ENSDARG00000012204	CDK18		0.315705	0.220237	2.25219	0.697605	0.350926	4.82865e-274
24	ENSDARG00000063706	pde8b	phosphodiesterase 8B	0.308876	0.209925	1.50394	0.679641	0.286488	3.05699e-222
24	ENSDARG00000091342	adcy5	adenylate cyclase 5	0.305063	0.255741	3.99264	0.838323	0.427914	0
24	ENSDARG00000088168	ablim3	actin binding LIM protein family, member 3	0.294231	0.222876	1.81119	0.757485	0.341568	1.69168e-266
24	ENSDARG00000109783	igsf11	immunoglobulin superfamily member 11	0.258838	0.240239	5.20209	0.928144	0.437156	0
24	ENSDARG00000103476	trpm1b	transient receptor potential cation channel, subfamily M, member 1b	0.249652	0.224238	3.90618	0.898204	0.40884	0
24	ENSDARG00000079742	mcf2l2	MCF.2 cell line derived transforming sequence-like 2	0.207364	0.193705	4.6072	0.934132	0.420506	0
25	ENSDARG00000013476	arhgef39	Rho guanine nucleotide exchange factor (GEF) 39	0.283371	0.0595079	0.268322	0.21	0.0674584	2.58431e-44
25	ENSDARG00000021866	upk1a	uroplakin 1a	0.224218	0.0590441	0.275565	0.263333	0.048646	9.95387e-31
25	ENSDARG00000045308	pola1	polymerase (DNA directed), alpha 1	0.211986	0.078435	0.48753	0.37	0.094514	7.24502e-64
25	ENSDARG00000069888	cldna	claudin a	0.203022	0.0791786	0.671725	0.39	0.0575202	3.88571e-37
25	ENSDARG00000101670	kntc1	kinetochore associated 1	0.197206	0.0611339	0.380248	0.31	0.0778117	8.57594e-52
25	ENSDARG00000052721	prim2	DNA primase subunit 2	0.183269	0.0928563	0.909039	0.506667	0.126318	6.84373e-87
25	ENSDARG00000090785	diaph3	diaphanous-related formin 3	0.178461	0.120164	1.91503	0.673333	0.162923	1.84327e-113
25	ENSDARG00000036791	dnmt3bb.1	DNA (cytosine-5-)-methyltransferase 3 beta, duplicate b.1	0.16503	0.0610611	0.645272	0.37	0.0575041	3.99118e-37
25	ENSDARG00000090268	krtt1c19e	keratin type 1 c19e	0.162375	0.0584551	1.64199	0.36	0.0344293	1.86114e-20
25	ENSDARG00000077881	chl1a	cell adhesion molecule L1-like a	0.14399	0.0993534	1.98172	0.69	0.0982594	1.41613e-66
25	ENSDARG00000075565	lzts1	leucine zipper, putative tumor suppressor 1	0.138844	0.0920995	2.12041	0.663333	0.101909	3.24035e-69
25	ENSDARG00000055093	cdh27	cadherin 27	0.118855	0.0618044	1.00922	0.52	0.0350423	6.70716e-21
25	ENSDARG00000031658	si:ch211-207d6.2	si:ch211-207d6.2	0.114191	0.066231	1.06157	0.58	0.0691554	1.53701e-45
25	ENSDARG00000062000	abtb2b	ankyrin repeat and BTB (POZ) domain containing 2b	0.113352	0.061588	0.980952	0.543333	0.0671484	4.3277e-44
25	ENSDARG00000054609	slco2b1	solute carrier organic anion transporter family, member 2B1	0.113018	0.0602762	1.09809	0.533333	0.0470484	1.41844e-29
25	ENSDARG00000029146	lrp1ab	low density lipoprotein receptor-related protein 1Ab	0.111853	0.0585362	1.25238	0.523333	0.0425329	2.59093e-26
25	ENSDARG00000056218	tnika	TRAF2 and NCK interacting kinase a	0.106605	0.0646735	1.21573	0.606667	0.0673689	2.99904e-44
25	ENSDARG00000063649	tead3b	TEA domain family member 3 b	0.105224	0.0596271	1.10527	0.566667	0.0434198	5.92579e-27
25	ENSDARG00000098024	si:dkey-262k9.2	si:dkey-262k9.2	0.101922	0.0811978	2.58015	0.796667	0.0751178	7.57801e-50
25	ENSDARG00000017522	ctdp1	CTD (carboxy-terminal domain, RNA polymerase II, polypeptide A) phosphatase, subunit 1	0.101706	0.0691602	1.57858	0.68	0.0862956	6.33978e-58
25	ENSDARG00000058371	krt5	keratin 5	0.100885	0.0931503	18.1026	0.923333	0.041116	2.73553e-25
25	ENSDARG00000076673	wu:fi04e12	wu:fi04e12	0.100411	0.0592427	1.04333	0.59	0.0364104	6.87962e-22
26	ENSDARG00000100476	si:dkeyp-110c7.4	si:dkeyp-110c7.4	0.818372	0.424012	1.32006	0.518116	0.407273	8.09931e-274
26	ENSDARG00000086272	si:dkey-4p15.5	si:dkey-4p15.5	0.793972	0.713424	5.0722	0.898551	0.755866	0
26	ENSDARG00000090969	cbln18	cerebellin 18	0.767829	0.189175	0.51173	0.246377	0.175264	2.50345e-114
26	ENSDARG00000087224	si:ch73-380n15.2	si:ch73-380n15.2	0.766819	0.586227	4.17078	0.764493	0.603002	0
26	ENSDARG00000055014	si:dkey-33m11.8	si:dkey-33m11.8	0.760876	0.556873	2.03846	0.731884	0.585925	0
26	ENSDARG00000057408	CABZ01067232.1		0.755634	0.262829	0.672321	0.347826	0.257751	1.13801e-170
26	ENSDARG00000038891	AL954146.1		0.746831	0.546594	2.19598	0.731884	0.582393	0
26	ENSDARG00000074666	zgc:153760	zgc:153760	0.715339	0.194386	0.464402	0.271739	0.188857	1.37988e-123
26	ENSDARG00000101702	chrna7	cholinergic receptor, nicotinic, alpha 7 (neuronal)	0.712119	0.485067	2.05715	0.681159	0.512232	0
26	ENSDARG00000078068	abcg4b	ATP-binding cassette, sub-family G (WHITE), member 4b	0.643068	0.212026	0.565814	0.32971	0.222521	1.4685e-146
26	ENSDARG00000116457	zmp:0000001088	zmp:0000001088	0.631694	0.498947	2.77982	0.789855	0.583504	0
26	ENSDARG00000069296	moxd1l	monooxygenase, DBH-like 1, like	0.611297	0.330012	1.12031	0.539855	0.366913	7.65721e-246
26	ENSDARG00000104431	slc1a3a	solute carrier family 1 member 3a	0.579466	0.554272	9.0392	0.956522	0.731652	0
26	ENSDARG00000096721	si:rp71-1c10.11	si:rp71-1c10.11	0.504257	0.191837	0.724366	0.380435	0.224811	3.99815e-148
26	ENSDARG00000100244	ebf3a	EBF transcription factor 3a	0.473246	0.416662	8.2205	0.880435	0.548709	0
26	ENSDARG00000075334	arhgap32a	Rho GTPase activating protein 32a	0.472348	0.258422	1.19283	0.547101	0.328586	2.285e-219
26	ENSDARG00000076462	ndnfl	neuron-derived neurotrophic factor , like	0.46466	0.202026	1.04565	0.434783	0.22851	1.18395e-150
26	ENSDARG00000033498	rorb	RAR-related orphan receptor B	0.430247	0.318008	2.76122	0.73913	0.427612	5.91313e-288
26	ENSDARG00000077096	fndc7a	fibronectin type III domain containing 7a	0.429601	0.264609	1.45449	0.615942	0.356874	6.71393e-239
26	ENSDARG00000043242	si:dkey-222f2.1	si:dkey-222f2.1	0.422666	0.292497	1.63736	0.692029	0.411567	8.42713e-277
26	ENSDARG00000060609	cd109	CD109 molecule	0.402236	0.298762	2.21776	0.742754	0.453111	1.03118e-305
26	ENSDARG00000088315	si:ch211-103f14.3	si:ch211-103f14.3	0.400415	0.25969	1.82476	0.648551	0.34834	5.30296e-233
26	ENSDARG00000039966	prom1a	prominin 1a	0.352674	0.230005	1.74069	0.652174	0.328982	1.21792e-219
26	ENSDARG00000105088	tenm4	teneurin transmembrane protein 4	0.326935	0.242832	3.1018	0.742754	0.329787	3.39268e-220
26	ENSDARG00000028618	krt18b	keratin 18b	0.317859	0.219968	1.70649	0.692029	0.294875	3.72928e-196
26	ENSDARG00000014259	eya1	EYA transcriptional coactivator and phosphatase 1	0.288759	0.276204	6.18279	0.956522	0.485404	0
26	ENSDARG00000040291	cadm4	cell adhesion molecule 4	0.28711	0.28711	20.9951	1	0.661336	0
26	ENSDARG00000012397	eya4	EYA transcriptional coactivator and phosphatase 4	0.264555	0.202251	2.21842	0.764493	0.336057	1.60429e-224
26	ENSDARG00000010132	dacha	dachshund a	0.254059	0.189623	2.43453	0.746377	0.302565	1.91521e-201
26	ENSDARG00000103648	znf536	zinc finger protein 536	0.230541	0.211329	6.57289	0.916667	0.287889	2.36426e-191
27	ENSDARG00000045748	stab2	stabilin 2	0.771058	0.41969	1.49314	0.544304	0.404503	6.32855e-240
27	ENSDARG00000014946	angpt2a	angiopoietin 2a	0.755487	0.19445	0.595564	0.257384	0.183049	2.04084e-105
27	ENSDARG00000088801	fgd5a	FYVE, RhoGEF and PH domain containing 5a	0.741324	0.516112	2.32374	0.696203	0.530003	0
27	ENSDARG00000074829	rasip1	Ras interacting protein 1	0.738313	0.233643	0.523416	0.316456	0.216738	9.76038e-126
27	ENSDARG00000017321	kdr	kinase insert domain receptor (a type III receptor tyrosine kinase)	0.729243	0.301544	0.730248	0.413502	0.311717	2.70016e-183
27	ENSDARG00000013653	adgrl4	adhesion G protein-coupled receptor L4	0.724246	0.195577	0.442646	0.270042	0.179432	3.08396e-103
27	ENSDARG00000102100	mrc1a	mannose receptor, C type 1a	0.6806	0.284301	1.42012	0.417722	0.285417	2.56922e-167
27	ENSDARG00000100657	egfl7	EGF-like-domain, multiple 7	0.658862	0.366961	1.31453	0.556962	0.36006	9.47229e-213
27	ENSDARG00000104453	flt4	fms-related tyrosine kinase 4	0.620612	0.363988	2.24983	0.586498	0.357244	4.9627e-211
27	ENSDARG00000077577	ntsr1	neurotensin receptor 1 (high affinity)	0.619839	0.209228	0.651046	0.337553	0.207269	5.0801e-120
27	ENSDARG00000076484	stab1	stabilin 1	0.616035	0.405491	3.23447	0.658228	0.435645	5.04613e-259
27	ENSDARG00000037553	il1rapl2	interleukin 1 receptor accessory protein-like 2	0.613278	0.336397	2.94631	0.548523	0.335031	1.73825e-197
27	ENSDARG00000004105	tie1	tyrosine kinase with immunoglobulin-like and EGF-like domains 1	0.579037	0.141705	0.364514	0.244726	0.138219	1.90225e-78
27	ENSDARG00000014522	cdh6	cadherin 6	0.574249	0.407062	2.76909	0.708861	0.455702	2.38512e-271
27	ENSDARG00000011571	calcrlb	calcitonin receptor-like b	0.541324	0.205566	0.700738	0.379747	0.219233	3.03409e-127
27	ENSDARG00000078624	arhgef9b	Cdc42 guanine nucleotide exchange factor (GEF) 9b	0.530381	0.17008	0.550246	0.320675	0.190803	4.33741e-110
27	ENSDARG00000102125	iqsec2a	IQ motif and Sec7 domain 2a	0.494582	0.287984	1.65794	0.582278	0.373264	8.17836e-221
27	ENSDARG00000054632	fli1a	Fli-1 proto-oncogene, ETS transcription factor a	0.479593	0.3258	1.4751	0.679325	0.361079	2.26256e-213
27	ENSDARG00000060929	rnf220a	ring finger protein 220a	0.4192	0.185721	1.42165	0.443038	0.213687	6.78026e-124
27	ENSDARG00000031891	tbx1	T-box 1	0.415356	0.191029	0.873902	0.459916	0.197478	4.09665e-114
27	ENSDARG00000040123	zfpm2a	zinc finger protein, FOG family member 2a	0.41117	0.192573	1.17485	0.468354	0.193274	1.40501e-111
27	ENSDARG00000077677	pdgfd	platelet derived growth factor d	0.36195	0.177157	1.04907	0.489451	0.207716	2.72945e-120
27	ENSDARG00000062997	hyal2b	hyaluronidase 2b	0.35637	0.142849	0.869512	0.400844	0.155914	4.40023e-89
27	ENSDARG00000054451	loxl1	lysyl oxidase-like 1	0.338522	0.177117	1.36433	0.523207	0.180497	7.03435e-104
27	ENSDARG00000031751	npr1a	natriuretic peptide receptor 1a	0.33575	0.185584	1.41404	0.552743	0.183636	9.03853e-106
27	ENSDARG00000007807	cyth3a	cytohesin 3a	0.298422	0.152359	0.955346	0.510549	0.203142	1.57053e-117
27	ENSDARG00000004378	yrk	Yes-related kinase	0.282939	0.165943	1.16927	0.586498	0.255719	2.6029e-149
27	ENSDARG00000100244	ebf3a	EBF transcription factor 3a	0.212848	0.152676	2.91189	0.7173	0.258125	9.07986e-151
27	ENSDARG00000059707	si:ch211-216l23.1	si:ch211-216l23.1	0.199463	0.158224	2.28056	0.793249	0.227813	1.9868e-132
27	ENSDARG00000032435	itga9	integrin, alpha 9	0.183194	0.143	3.71281	0.780591	0.174902	1.64717e-100
28	ENSDARG00000079484	kcnt1	potassium channel, subfamily T, member 1	0.713949	0.304205	0.929491	0.426087	0.308358	8.26023e-177
28	ENSDARG00000059798	kcnq1.1	potassium voltage-gated channel, KQT-like subfamily, member 1.1	0.675018	0.410881	1.78605	0.608696	0.431254	4.6899e-250
28	ENSDARG00000074866	ptpn5	protein tyrosine phosphatase non-receptor type 5	0.670612	0.282823	0.908262	0.421739	0.297142	3.70165e-170
28	ENSDARG00000107086	PIEZO2		0.657684	0.468957	2.00897	0.713043	0.501634	2.6005e-292
28	ENSDARG00000058732	scgn	secretagogin, EF-hand calcium binding protein	0.650296	0.313838	0.895932	0.482609	0.318077	1.4095e-182
28	ENSDARG00000079295	cacna1bb	calcium channel, voltage-dependent, N type, alpha 1B subunit, b	0.6122	0.380629	1.4964	0.621739	0.414973	2.59119e-240
28	ENSDARG00000032799	kcnd2	potassium voltage-gated channel, Shal-related subfamily, member 2	0.589679	0.515329	4.5304	0.873913	0.626942	0
28	ENSDARG00000100971	fxyd6	FXYD domain containing ion transport regulator 6	0.588251	0.232743	1.06041	0.395652	0.224034	6.16737e-127
28	ENSDARG00000070919	cpne5b	copine Vb	0.544141	0.264973	1.22764	0.486957	0.273442	4.02553e-156
28	ENSDARG00000016494	ddc	dopa decarboxylase	0.543909	0.163173	0.748872	0.3	0.166469	4.65676e-93
28	ENSDARG00000004988	ppp3ca	protein phosphatase 3, catalytic subunit, alpha isozyme	0.520501	0.364351	2.04369	0.7	0.435505	1.33436e-252
28	ENSDARG00000061918	cplx2	complexin 2	0.51914	0.300198	1.42684	0.578261	0.347828	2.92747e-200
28	ENSDARG00000060496	cacna1ha	calcium channel, voltage-dependent, T type, alpha 1H subunit a	0.500999	0.322382	1.61948	0.643478	0.34495	1.50894e-198
28	ENSDARG00000002644	rgs5a	regulator of G protein signaling 5a	0.467566	0.152467	0.768644	0.326087	0.16485	4.15976e-92
28	ENSDARG00000073752	CACNA2D1		0.452748	0.206689	0.8658	0.456522	0.214866	1.56449e-121
28	ENSDARG00000087413	bean1	brain expressed, associated with NEDD4, 1	0.441962	0.18255	0.97224	0.413043	0.224332	4.11452e-127
28	ENSDARG00000008140	kcnab1a	potassium voltage-gated channel, shaker-related subfamily, beta member 1 a	0.437543	0.262526	1.82174	0.6	0.331922	8.42102e-191
28	ENSDARG00000038655	ajap1	adherens junctions associated protein 1	0.435059	0.20618	1.01039	0.473913	0.22949	3.73414e-130
28	ENSDARG00000062346	cacna1ea	calcium channel, voltage-dependent, R type, alpha 1E subunit a	0.433594	0.188519	0.782802	0.434783	0.229349	4.5248e-130
28	ENSDARG00000040466	vil1	villin 1	0.42857	0.262732	1.93974	0.613043	0.398528	1.74521e-230
28	ENSDARG00000054378	pcbp3	poly(rC) binding protein 3	0.398255	0.289167	2.34828	0.726087	0.412114	1.32757e-238
28	ENSDARG00000013056	itpk1a	inositol-tetrakisphosphate 1-kinase a	0.398152	0.257933	2.18651	0.647826	0.349137	4.86977e-201
28	ENSDARG00000002656	stxbp5a	syntaxin binding protein 5a (tomosyn)	0.384142	0.258878	1.64922	0.673913	0.320625	4.32892e-184
28	ENSDARG00000076265	ano8a	anoctamin 8a	0.369605	0.186409	0.990011	0.504348	0.236277	3.69534e-134
28	ENSDARG00000043661	cadpsa	Ca2+-dependent activator protein for secretion a	0.335218	0.161779	0.958077	0.482609	0.240852	7.36491e-137
28	ENSDARG00000116433	LO017877.2		0.333437	0.171068	1.2602	0.513043	0.253056	4.56569e-144
28	ENSDARG00000008398	cacna1c	calcium channel, voltage-dependent, L type, alpha 1C subunit	0.30883	0.185298	1.33881	0.6	0.241878	1.82523e-137
28	ENSDARG00000088293	doc2b	double C2-like domains, beta	0.21492	0.190625	4.62546	0.886957	0.3498	1.96496e-201
28	ENSDARG00000056206	camk2g2	calcium/calmodulin-dependent protein kinase (CaM kinase) II gamma 2	0.181336	0.149011	2.80583	0.821739	0.267047	2.44568e-152
28	ENSDARG00000014746	rbfox1	RNA binding fox-1 homolog 1	0.175804	0.149816	4.14708	0.852174	0.231131	4.02221e-131
29	ENSDARG00000057728	slc17a8	solute carrier family 17 member 8	0.862862	0.601791	1.71684	0.697436	0.574135	6.24354e-293
29	ENSDARG00000020581	otofb	otoferlin b	0.856354	0.794872	4.25341	0.928205	0.817349	0
29	ENSDARG00000030311	tmc2b	transmembrane channel-like 2b	0.845667	0.394645	0.987312	0.466667	0.365618	8.82287e-184
29	ENSDARG00000077382	hcn5	hyperpolarization activated cyclic nucleotide-gated potassium channel 5	0.809768	0.543998	1.2398	0.671795	0.543878	5.35104e-277
29	ENSDARG00000103264	si:dkey-25g12.4	si:dkey-25g12.4	0.768367	0.370393	0.962539	0.482051	0.371789	5.45755e-187
29	ENSDARG00000037790	pvalb8	parvalbumin 8	0.756594	0.698395	8.75451	0.923077	0.801152	0
29	ENSDARG00000036773	s100s	S100 calcium binding protein S	0.756248	0.36455	1.3792	0.482051	0.347583	2.07101e-174
29	ENSDARG00000094454	cdh23	cadherin-related 23	0.755267	0.631326	2.75694	0.835897	0.664625	0
29	ENSDARG00000074638	loxhd1b	lipoxygenase homology domains 1b	0.742371	0.376896	1.25189	0.507692	0.378331	2.15953e-190
29	ENSDARG00000062693	nrxn3b	neurexin 3b	0.733854	0.715037	6.61356	0.974359	0.853259	0
29	ENSDARG00000079336	strc1	stereocilin 1	0.726518	0.435911	1.3487	0.6	0.427707	4.00376e-216
29	ENSDARG00000008849	ptprq	protein tyrosine phosphatase receptor type Q	0.71805	0.449241	1.58435	0.625641	0.439703	2.17949e-222
29	ENSDARG00000041776	ndst3	N-deacetylase/N-sulfotransferase (heparan glucosaminyl) 3	0.701591	0.366986	1.68213	0.523077	0.355421	1.75917e-178
29	ENSDARG00000062630	dnah9l	dynein, axonemal, heavy polypeptide 9 like	0.672462	0.379338	1.09271	0.564103	0.397285	2.92553e-200
29	ENSDARG00000087556	pacrg	PARK2 co-regulated	0.647626	0.368648	1.03418	0.569231	0.36993	5.05852e-186
29	ENSDARG00000103002	nptna	neuroplastin a	0.646137	0.390996	1.20452	0.605128	0.392603	8.03717e-198
29	ENSDARG00000058090	cfap57	cilia and flagella associated protein 57	0.630754	0.511073	2.07038	0.810256	0.580929	1.63507e-296
29	ENSDARG00000095603	grid2ipb	glutamate receptor, ionotropic, delta 2 (Grid2) interacting protein, b	0.628448	0.415743	1.40619	0.661538	0.459538	9.33172e-233
29	ENSDARG00000061817	kif1aa	kinesin family member 1Aa	0.628178	0.566971	3.26997	0.902564	0.70378	0
29	ENSDARG00000067537	pcsk5a	proprotein convertase subtilisin/kexin type 5a	0.628099	0.44128	1.6875	0.702564	0.515416	4.86085e-262
29	ENSDARG00000104480	hcn1	hyperpolarization activated cyclic nucleotide-gated potassium channel 1	0.608394	0.492955	4.89908	0.810256	0.570488	5.22062e-291
29	ENSDARG00000007561	cdh23	cadherin-related 23	0.60806	0.452147	1.83244	0.74359	0.500516	3.20584e-254
29	ENSDARG00000068050	agbl4	ATP/GTP binding protein-like 4	0.605017	0.428166	1.90489	0.707692	0.465754	5.22099e-236
29	ENSDARG00000087373	dnah5	dynein, axonemal, heavy chain 5	0.604308	0.517535	2.29764	0.85641	0.618186	0
29	ENSDARG00000098257	pcdh15a	protocadherin-related 15a	0.603019	0.581372	4.93159	0.964103	0.698362	0
29	ENSDARG00000052277	cabp2b	calcium binding protein 2b	0.586526	0.369962	2.08613	0.630769	0.383098	7.13966e-193
29	ENSDARG00000008127	pcdh15b	protocadherin-related 15b	0.577211	0.51801	3.05622	0.897436	0.561856	1.84304e-286
29	ENSDARG00000006892	myo3b	myosin IIIB	0.555004	0.409849	2.01827	0.738462	0.497204	1.7487e-252
29	ENSDARG00000063332	shank3a	SH3 and multiple ankyrin repeat domains 3a	0.496352	0.435262	2.94295	0.876923	0.542873	1.8075e-276
29	ENSDARG00000037122	TENM2		0.482683	0.366344	3.08626	0.758974	0.440543	7.93723e-223
30	ENSDARG00000055527	cmn	calymmin	0.803893	0.300045	0.591015	0.373239	0.250703	8.94669e-95
30	ENSDARG00000005139	hhatlb	hedgehog acyltransferase like, b	0.767229	0.329584	0.625215	0.429577	0.283464	8.65663e-108
30	ENSDARG00000092999	tnni4b.1	troponin I4b, tandem duplicate 1	0.754027	0.504455	1.50633	0.669014	0.484111	6.19839e-188
30	ENSDARG00000042245	myl13	myosin, light chain 13	0.741609	0.485702	2.16111	0.65493	0.441013	1.18426e-170
30	ENSDARG00000037539	tnnc1b	troponin C type 1b (slow)	0.729425	0.339029	0.835764	0.464789	0.296288	6.88469e-113
30	ENSDARG00000104713	zgc:165653	zgc:165653	0.713325	0.306429	0.57628	0.429577	0.269202	4.03034e-102
30	ENSDARG00000002988	tnnt2d	troponin T2d, cardiac	0.704827	0.501321	2.27921	0.711268	0.526816	4.28753e-205
30	ENSDARG00000011615	mybpc3	myosin binding protein C, cardiac	0.704224	0.639752	3.31569	0.908451	0.651781	1.59016e-255
30	ENSDARG00000070826	bpgm	2,3-bisphosphoglycerate mutase	0.701519	0.592833	2.8935	0.84507	0.61634	3.44446e-241
30	ENSDARG00000079111	actc1c	actin alpha cardiac muscle 1c	0.700121	0.453599	2.10762	0.647887	0.418784	9.37734e-162
30	ENSDARG00000062592	myl10	myosin, light chain 10, regulatory	0.699193	0.452998	1.8874	0.647887	0.435233	2.44585e-168
30	ENSDARG00000099959	smyhc1	slow myosin heavy chain 1	0.692716	0.517098	9.53977	0.746479	0.469059	6.7965e-182
30	ENSDARG00000036671	tnni4b.2	troponin I4b, tandem duplicate 2	0.679685	0.358989	0.913095	0.528169	0.35288	1.98635e-135
30	ENSDARG00000012409	rnf207b	ring finger protein 207b	0.668965	0.334482	0.628531	0.5	0.284862	2.40778e-108
30	ENSDARG00000037266	myoz2b	myozenin 2b	0.637734	0.458091	1.41749	0.71831	0.440115	2.71097e-170
30	ENSDARG00000035533	tacr1a	tachykinin receptor 1a	0.614553	0.38085	1.21353	0.619718	0.346181	9.32197e-133
30	ENSDARG00000006923	cacna1ab	calcium channel, voltage-dependent, P/Q type, alpha 1A subunit, b	0.613202	0.358421	1.49641	0.584507	0.354256	5.61589e-136
30	ENSDARG00000045822	tnnt2e	troponin T2e, cardiac	0.613101	0.565607	5.03486	0.922535	0.66708	1.01221e-261
30	ENSDARG00000103969	smyhc2	slow myosin heavy chain 2	0.611038	0.537885	5.442	0.880282	0.569928	1.86438e-222
30	ENSDARG00000029439	atp2a2a	ATPase sarcoplasmic/endoplasmic reticulum Ca2+ transporting 2a	0.585891	0.565261	8.15057	0.964789	0.767204	2.14449e-302
30	ENSDARG00000039256	spega	striated muscle enriched protein kinase a	0.560289	0.343276	1.06552	0.612676	0.302197	3.07112e-115
30	ENSDARG00000011422	ryr1a	ryanodine receptor 1a (skeletal)	0.54832	0.471092	2.11046	0.859155	0.462105	4.17847e-179
30	ENSDARG00000104836	myom1b	myomesin 1b	0.543094	0.428356	2.14376	0.788732	0.410953	1.27337e-158
30	ENSDARG00000104682	tpm2	tropomyosin 2 (beta)	0.5372	0.491803	3.90975	0.915493	0.555363	1.38046e-216
30	ENSDARG00000069662	fgf11a	fibroblast growth factor 11a	0.524712	0.343649	2.53834	0.65493	0.359273	5.59773e-138
30	ENSDARG00000020574	atp2a1	ATPase sarcoplasmic/endoplasmic reticulum Ca2+ transporting 1	0.472525	0.372696	2.99905	0.788732	0.359638	4.00124e-138
30	ENSDARG00000099420	nme2b.2	NME/NM23 nucleoside diphosphate kinase 2b, tandem duplicate 2	0.471963	0.345663	5.31077	0.732394	0.302176	3.13204e-115
30	ENSDARG00000067829	ppargc1a	peroxisome proliferator-activated receptor gamma, coactivator 1 alpha	0.445478	0.373323	5.92663	0.838028	0.431363	8.66226e-167
30	ENSDARG00000067848	nmrk2	nicotinamide riboside kinase 2	0.416486	0.337295	3.63423	0.809859	0.335741	1.35108e-128
30	ENSDARG00000032630	neb	nebulin	0.336419	0.319835	4.93226	0.950704	0.376058	1.11951e-144
31	ENSDARG00000008403	phospho1	phosphatase, orphan 1	0.231501	0.112973	0.680222	0.488	0.0929071	1.21884e-28
31	ENSDARG00000079572	plcd3b	phospholipase C, delta 3b	0.225645	0.11192	0.759623	0.496	0.0947426	2.7105e-29
31	ENSDARG00000095259	tmem119a	transmembrane protein 119a	0.225483	0.108232	0.680348	0.48	0.0908559	6.54016e-28
31	ENSDARG00000052633	si:ch211-106n13.3	si:ch211-106n13.3	0.222247	0.193799	5.17169	0.872	0.198007	4.89425e-66
31	ENSDARG00000012422	col11a2	collagen, type XI, alpha 2	0.213505	0.150308	2.13564	0.704	0.134282	2.34903e-43
31	ENSDARG00000098226	smpd3	sphingomyelin phosphodiesterase 3, neutral	0.210081	0.152939	1.91614	0.728	0.142655	2.46905e-46
31	ENSDARG00000004627	panx3	pannexin 3	0.20634	0.176627	3.19811	0.856	0.180778	6.68898e-60
31	ENSDARG00000025089	loxl4	lysyl oxidase-like 4	0.204252	0.184644	3.77163	0.904	0.204077	3.36696e-68
31	ENSDARG00000002507	itga10	integrin, alpha 10	0.200378	0.133051	1.44531	0.664	0.12668	1.18736e-40
31	ENSDARG00000037145	slc8a4b	solute carrier family 8 member 4b	0.200261	0.181036	5.32703	0.904	0.200986	4.25222e-67
31	ENSDARG00000015731	ano5a	anoctamin 5a	0.191415	0.13935	1.55674	0.728	0.135974	5.87568e-44
31	ENSDARG00000022437	cd81b	CD81 molecule b	0.191291	0.13926	1.62101	0.728	0.131025	3.38234e-42
31	ENSDARG00000024847	col5a2b	collagen, type V, alpha 2b	0.190729	0.125118	1.47955	0.656	0.116569	4.68051e-37
31	ENSDARG00000101592	prp		0.190566	0.164649	4.02693	0.864	0.176026	3.29037e-58
31	ENSDARG00000019516	sp7	Sp7 transcription factor	0.186685	0.123959	1.45818	0.664	0.110032	9.89056e-35
31	ENSDARG00000061977	ppfibp2a	PPFIA binding protein 2a	0.172083	0.134913	3.91321	0.784	0.1334	4.8376e-43
31	ENSDARG00000103638	CR936977.2		0.171341	0.102805	1.58213	0.6	0.0904988	8.76248e-28
31	ENSDARG00000096546	nrp2a	neuropilin 2a	0.170987	0.142261	2.94607	0.832	0.14528	2.87474e-47
31	ENSDARG00000054753	col10a1a	collagen, type X, alpha 1a	0.168613	0.141635	9.35681	0.84	0.134496	1.97131e-43
31	ENSDARG00000033327	unc5b	unc-5 netrin receptor B	0.147051	0.0917596	2.11936	0.624	0.0851856	6.80505e-26
31	ENSDARG00000023542	cdh7a	cadherin 7a	0.145173	0.0905878	1.45104	0.624	0.0767331	6.92963e-23
31	ENSDARG00000026165	col11a1a	collagen, type XI, alpha 1a	0.137692	0.0991382	2.36791	0.72	0.0908033	6.82827e-28
31	ENSDARG00000007172	plxna3	plexin A3	0.127438	0.113165	4.07253	0.888	0.130539	5.03636e-42
31	ENSDARG00000020957	pth1ra	parathyroid hormone 1 receptor a	0.124284	0.101416	2.59117	0.816	0.089936	1.38937e-27
31	ENSDARG00000021442	cdh11	cadherin 11, type 2, OB-cadherin (osteoblast)	0.119044	0.110473	4.38426	0.928	0.12128	9.88931e-39
31	ENSDARG00000026784	robo1	roundabout, axon guidance receptor, homolog 1 (Drosophila)	0.11895	0.108482	5.56158	0.912	0.109116	2.09332e-34
31	ENSDARG00000038446	nrp2b	neuropilin 2b	0.116868	0.0981689	3.27339	0.84	0.115184	1.45531e-36
31	ENSDARG00000031756	mef2aa	myocyte enhancer factor 2aa	0.116252	0.107882	4.23374	0.928	0.129748	9.62661e-42
31	ENSDARG00000040261	runx2a	RUNX family transcription factor 2a	0.114077	0.110427	7.79411	0.968	0.121774	6.59563e-39
32	ENSDARG00000095188	si:dkey-189h5.6	si:dkey-189h5.6	0.892365	0.257001	0.612583	0.288	0.221902	1.49474e-74
32	ENSDARG00000026403	hephl1b	hephaestin-like 1b	0.883796	0.169689	0.358616	0.192	0.140146	1.92694e-45
32	ENSDARG00000039131	atp1a1a.3	ATPase Na+/K+ transporting subunit alpha 1a, tandem duplicate 3	0.872204	0.544255	1.84076	0.624	0.508024	3.85545e-177
32	ENSDARG00000036722	slc9a3.2	solute carrier family 9 member A3, tandem duplicate 2	0.870834	0.2717	2.01975	0.312	0.241499	1.53385e-81
32	ENSDARG00000071173	slc12a10.2	solute carrier family 12 member 10, tandem duplicate 2	0.856307	0.376775	8.41596	0.44	0.3582	2.87455e-123
32	ENSDARG00000009550	foxi3b	forkhead box I3b	0.852109	0.163605	0.216734	0.192	0.153082	4.8176e-50
32	ENSDARG00000055253	slc12a10.3	solute carrier family 12 member 10, tandem duplicate 3	0.844713	0.189216	0.632128	0.224	0.162614	1.95459e-53
32	ENSDARG00000051873	zgc:158222	zgc:158222	0.841176	0.329741	1.26569	0.392	0.285286	3.56572e-97
32	ENSDARG00000099117	si:dkey-33i11.4	si:dkey-33i11.4	0.824723	0.639985	2.1909	0.776	0.606984	6.38025e-213
32	ENSDARG00000101264	trim35-12	tripartite motif containing 35-12	0.816147	0.195875	0.528589	0.24	0.180036	1.22896e-59
32	ENSDARG00000060622	si:ch73-14h1.2	si:ch73-14h1.2	0.81552	0.215297	0.619323	0.264	0.184943	2.20037e-61
32	ENSDARG00000007739	atp1a1a.2	ATPase Na+/K+ transporting subunit alpha 1a, tandem duplicate 2	0.806388	0.219338	0.572044	0.272	0.211161	1.00695e-70
32	ENSDARG00000060439	clcn2c	chloride channel 2c	0.792795	0.298091	1.70408	0.376	0.289164	1.46593e-98
32	ENSDARG00000076833	atp1b1b	ATPase Na+/K+ transporting subunit beta 1b	0.788622	0.593044	3.11725	0.752	0.596068	5.75022e-209
32	ENSDARG00000101655	sstr5	somatostatin receptor 5	0.745217	0.214622	0.537253	0.288	0.199362	1.61131e-66
32	ENSDARG00000077633	magixb	MAGI family member, X-linked b	0.736916	0.418568	1.39108	0.568	0.376659	6.91977e-130
32	ENSDARG00000063370	sgk2a	serum/glucocorticoid regulated kinase 2a	0.725748	0.226433	0.447121	0.312	0.212393	3.66348e-71
32	ENSDARG00000041119	ceacam1	carcinoembryonic antigen-related cell adhesion molecule 1	0.704504	0.197261	0.654623	0.28	0.165809	1.42516e-54
32	ENSDARG00000040627	grik1b	glutamate receptor, ionotropic, kainate 1b	0.684848	0.219151	0.620299	0.32	0.19954	1.39173e-66
32	ENSDARG00000013730	slc4a4a	solute carrier family 4 member 4a	0.618982	0.158459	0.957336	0.256	0.152655	6.83868e-50
32	ENSDARG00000105590	si:cabz01007794.1	si:cabz01007794.1	0.587537	0.258516	2.19762	0.44	0.247279	1.32881e-83
32	ENSDARG00000073728	gal3st3	galactose-3-O-sulfotransferase 3	0.51705	0.297821	1.66855	0.576	0.324755	2.73442e-111
32	ENSDARG00000004861	esrrga	estrogen-related receptor gamma a	0.476636	0.25929	1.05741	0.544	0.238219	2.268e-80
32	ENSDARG00000078541	cers3a	ceramide synthase 3a	0.43058	0.172232	0.75972	0.4	0.168838	1.19108e-55
32	ENSDARG00000044808	slc4a4b	solute carrier family 4 member 4b	0.421756	0.15858	1.87066	0.376	0.170878	2.23866e-56
32	ENSDARG00000100969	tmprss13a	transmembrane serine protease 13a	0.327015	0.151735	1.71524	0.464	0.108965	2.37042e-34
32	ENSDARG00000061551	rap1gap2a	RAP1 GTPase activating protein 2a	0.268766	0.141908	2.07742	0.528	0.170401	3.30813e-56
32	ENSDARG00000090063	fa2h	fatty acid 2-hydroxylase	0.255282	0.151127	1.43152	0.592	0.181577	3.47512e-60
32	ENSDARG00000078775	RASA2		0.23674	0.151514	1.42136	0.64	0.206261	5.61035e-69
32	ENSDARG00000099843	nedd4a	NEDD4 E3 ubiquitin protein ligase a	0.227123	0.158077	1.67524	0.696	0.18371	6.04807e-61
33	ENSDARG00000088641	grn2	granulin 2	0.865131	0.204899	0.417654	0.236842	0.180448	4.74358e-55
33	ENSDARG00000093193	chia.6	chitinase, acidic.6	0.806225	0.289958	0.504382	0.359649	0.258404	8.86387e-81
33	ENSDARG00000069103	si:dkeyp-82a1.4	si:dkeyp-82a1.4	0.7316	0.231032	0.447478	0.315789	0.240289	8.54592e-75
33	ENSDARG00000091834	si:ch211-198m17.1	si:ch211-198m17.1	0.72318	0.444058	1.48141	0.614035	0.434529	3.65058e-139
33	ENSDARG00000077666	evi5a	ecotropic viral integration site 5a	0.718701	0.283698	0.644257	0.394737	0.263458	1.89377e-82
33	ENSDARG00000036420	si:dkey-33c9.6	si:dkey-33c9.6	0.592602	0.374275	1.33173	0.631579	0.407961	2.48087e-130
33	ENSDARG00000033516	efr3ba	EFR3 homolog Ba (S. cerevisiae)	0.591631	0.311385	1.34244	0.526316	0.312283	1.34114e-98
33	ENSDARG00000033735	ncf1	neutrophil cytosolic factor 1	0.582231	0.306437	1.43412	0.526316	0.304937	3.62388e-96
33	ENSDARG00000039265	arhgap4a	Rho GTPase activating protein 4a	0.554381	0.340409	1.73139	0.614035	0.379481	7.12388e-121
33	ENSDARG00000038467	igsf8	immunoglobulin superfamily, member 8	0.548747	0.361018	2.47385	0.657895	0.355969	4.49739e-113
33	ENSDARG00000100293	arhgef15	Rho guanine nucleotide exchange factor (GEF) 15	0.458743	0.241444	1.11193	0.526316	0.244114	4.65976e-76
33	ENSDARG00000059365	nipal4	NIPA like domain containing 4	0.454363	0.346751	2.6003	0.763158	0.464876	2.89704e-149
33	ENSDARG00000004979	elovl5	ELOVL fatty acid elongase 5	0.452182	0.17056	0.567579	0.377193	0.168627	3.73963e-51
33	ENSDARG00000076202	zdhhc11	zinc finger, DHHC-type containing 11	0.449045	0.228461	0.999465	0.508772	0.275433	2.08475e-86
33	ENSDARG00000067797	spi1a	Spi-1 proto-oncogene a	0.426427	0.216954	1.05883	0.508772	0.237578	6.71181e-74
33	ENSDARG00000055875	pag1	phosphoprotein membrane anchor with glycosphingolipid microdomains 1	0.408284	0.383214	5.71227	0.938596	0.532785	6.52431e-172
33	ENSDARG00000076697	SIPA1		0.387868	0.272188	1.89703	0.701754	0.341265	3.36821e-108
33	ENSDARG00000055955	lcp2a	lymphocyte cytosolic protein 2a	0.361073	0.167867	1.07523	0.464912	0.192212	6.26633e-59
33	ENSDARG00000052496	arhgap45a	Rho GTPase activating protein 45a	0.359754	0.233525	1.26805	0.649123	0.264176	1.09688e-82
33	ENSDARG00000002607	unm_sa1614	un-named sa1614	0.345195	0.202878	1.5335	0.587719	0.240368	8.0422e-75
33	ENSDARG00000061421	FQ311928.1		0.322672	0.18681	2.45938	0.578947	0.241509	3.37803e-75
33	ENSDARG00000102762	pik3r5	phosphoinositide-3-kinase, regulatory subunit 5	0.317911	0.175688	1.11118	0.552632	0.218911	9.75136e-68
33	ENSDARG00000033042	ptprja	protein tyrosine phosphatase receptor type Ja	0.308813	0.208584	1.84375	0.675439	0.329303	3.09622e-104
33	ENSDARG00000074819	si:dkeyp-23e4.3	si:dkeyp-23e4.3	0.305074	0.254229	5.25853	0.833333	0.286481	4.63017e-90
33	ENSDARG00000011333	arhgap33	Rho GTPase activating protein 33	0.284302	0.23193	3.09569	0.815789	0.338925	2.0084e-107
33	ENSDARG00000075034	raver2	ribonucleoprotein, PTB-binding 2	0.25718	0.189501	2.26236	0.736842	0.274988	2.92392e-86
33	ENSDARG00000022187	usp6nl	USP6 N-terminal like	0.256016	0.213346	3.0572	0.833333	0.296828	1.74799e-93
33	ENSDARG00000035452	camkk1a	calcium/calmodulin-dependent protein kinase kinase 1, alpha a	0.242339	0.206201	2.84744	0.850877	0.328026	8.19972e-104
33	ENSDARG00000078430	tiam1a	T cell lymphoma invasion and metastasis 1a	0.218905	0.205464	4.15906	0.938596	0.290965	1.52131e-91
33	ENSDARG00000098753	elmo1	engulfment and cell motility 1 (ced-12 homolog, C. elegans)	0.205009	0.170841	3.38165	0.833333	0.229758	2.56234e-71
34	ENSDARG00000034588	scn4ab	sodium channel, voltage-gated, type IV, alpha, b	0.646301	0.434894	4.23403	0.672897	0.415742	8.28374e-126
34	ENSDARG00000103109	chl1b	cell adhesion molecule L1-like b	0.584777	0.311517	2.07808	0.53271	0.295793	4.1764e-88
34	ENSDARG00000060222	scn1ba	sodium channel, voltage-gated, type I, beta a	0.535134	0.115029	0.314862	0.214953	0.118229	1.52379e-32
34	ENSDARG00000035309	entpd3	ectonucleoside triphosphate diphosphohydrolase 3	0.524227	0.093087	0.307672	0.17757	0.087557	5.89231e-23
34	ENSDARG00000018065	ntm	neurotrimin	0.488613	0.351618	6.10727	0.719626	0.371104	9.28605e-112
34	ENSDARG00000104786	nlgn3a	neuroligin 3a	0.455624	0.195876	1.05543	0.429907	0.212837	4.0521e-62
34	ENSDARG00000061042	gabbr2	gamma-aminobutyric acid (GABA) B receptor, 2	0.449588	0.0966403	0.703662	0.214953	0.0856968	2.24935e-22
34	ENSDARG00000078898	pcdh7a	protocadherin 7a	0.419455	0.148965	1.68964	0.35514	0.143035	2.70097e-40
34	ENSDARG00000077329	nlgn2a	neuroligin 2a	0.389566	0.214807	2.08425	0.551402	0.240891	6.70654e-71
34	ENSDARG00000013005	opcml	opioid binding protein/cell adhesion molecule-like	0.389212	0.167325	1.59307	0.429907	0.169421	1.53158e-48
34	ENSDARG00000053003	slc35f1	solute carrier family 35 member F1	0.347155	0.100578	0.656305	0.28972	0.109535	7.94287e-30
34	ENSDARG00000062720	pcdh1a	protocadherin 1a	0.340405	0.101803	0.794218	0.299065	0.106558	6.76455e-29
34	ENSDARG00000021607	negr1	neuronal growth regulator 1	0.305711	0.111427	0.968212	0.364486	0.131794	8.79202e-37
34	ENSDARG00000061517	lrp1bb	low density lipoprotein receptor-related protein 1Bb	0.305629	0.091403	1.01042	0.299065	0.101616	2.37072e-27
34	ENSDARG00000063133	slc4a10a	solute carrier family 4 member 10a	0.279986	0.130834	1.29191	0.46729	0.180406	5.6363e-52
34	ENSDARG00000006025	tp53i11b	tumor protein p53 inducible protein 11b	0.262596	0.188971	3.42743	0.719626	0.255545	1.72536e-75
34	ENSDARG00000058853	sash1b	SAM and SH3 domain containing 1b	0.261481	0.0953062	0.793891	0.364486	0.0912285	4.18985e-24
34	ENSDARG00000014215	cdh13	cadherin 13, H-cadherin (heart)	0.260082	0.0899348	0.813676	0.345794	0.113851	3.55601e-31
34	ENSDARG00000004621	gpm6ab	glycoprotein M6Ab	0.257891	0.147022	1.66611	0.570093	0.198641	1.11865e-57
34	ENSDARG00000043313	ank2b	ankyrin 2b, neuronal	0.2509	0.204003	3.09666	0.813084	0.276939	3.41116e-82
34	ENSDARG00000069427	nkain2	sodium/potassium transporting ATPase interacting 2	0.241062	0.0901167	1.27453	0.373832	0.100231	6.42469e-27
34	ENSDARG00000088630	arhgef10la	Rho guanine nucleotide exchange factor (GEF) 10-like a	0.210874	0.0906562	0.968446	0.429907	0.121968	1.0339e-33
34	ENSDARG00000116871	BX284638.1		0.204959	0.116846	1.71616	0.570093	0.143623	1.76989e-40
34	ENSDARG00000003512	anks1b	ankyrin repeat and sterile alpha motif domain containing 1B	0.202006	0.134041	2.65328	0.663551	0.16189	3.45967e-46
34	ENSDARG00000002026	qkib	QKI, KH domain containing, RNA binding b	0.198884	0.0929366	0.985028	0.46729	0.104347	3.32125e-28
34	ENSDARG00000036993	erbb3b	erb-b2 receptor tyrosine kinase 3b	0.189569	0.0903555	1.22246	0.476636	0.0798456	1.52173e-20
34	ENSDARG00000031075	cadm1a	cell adhesion molecule 1a	0.168587	0.0929594	1.91797	0.551402	0.0973493	5.112e-26
34	ENSDARG00000077465	sorcs2	sortilin-related VPS10 domain containing receptor 2	0.16602	0.111714	3.25778	0.672897	0.125887	6.16449e-35
34	ENSDARG00000062123	agap1	ArfGAP with GTPase domain, ankyrin repeat and PH domain 1	0.127482	0.110802	3.80436	0.869159	0.175282	2.25346e-50
34	ENSDARG00000024276	pcbp4	poly(rC) binding protein 4	0.120547	0.0923816	2.49172	0.766355	0.153632	1.31796e-43
35	ENSDARG00000096821	si:ch211-256e16.7	si:ch211-256e16.7	0.865261	0.161642	0.371509	0.186813	0.13025	3.90711e-31
35	ENSDARG00000078428	si:ch211-256e16.4	si:ch211-256e16.4	0.828163	0.455035	1.29567	0.549451	0.411112	6.20165e-108
35	ENSDARG00000043074	grp	gastrin-releasing peptide	0.82768	0.573009	1.5877	0.692308	0.542504	4.5159e-144
35	ENSDARG00000115752	CABZ01028768.1		0.792506	0.209013	0.654965	0.263736	0.171638	1.99569e-42
35	ENSDARG00000115573	CR759836.1		0.76341	0.453013	1.50634	0.593407	0.39443	2.34301e-103
35	ENSDARG00000111812	CABZ01073083.1		0.753626	0.51346	1.4655	0.681319	0.480047	7.11119e-127
35	ENSDARG00000089709	gfral	GDNF family receptor alpha like	0.722117	0.380897	1.06579	0.527473	0.35221	8.79167e-92
35	ENSDARG00000040608	gcnt7	glucosaminyl (N-acetyl) transferase family member 7	0.588913	0.194147	0.508537	0.32967	0.162865	4.94072e-40
35	ENSDARG00000035970	ptprn2	protein tyrosine phosphatase receptor type N2	0.512905	0.242362	0.883476	0.472527	0.252762	1.41834e-64
35	ENSDARG00000055046	ponzr5	plac8 onzin related protein 5	0.505198	0.20541	0.623594	0.406593	0.242821	7.37473e-62
35	ENSDARG00000055305	ret	ret proto-oncogene receptor tyrosine kinase	0.48456	0.287541	1.3192	0.593407	0.322439	1.24985e-83
35	ENSDARG00000019451	pcsk2	proprotein convertase subtilisin/kexin type 2	0.481223	0.121628	0.379109	0.252747	0.137322	4.59562e-33
35	ENSDARG00000075292	myo15aa	myosin XVAa	0.443653	0.287643	1.65648	0.648352	0.35203	9.84588e-92
35	ENSDARG00000030832	otofa	otoferlin a	0.442111	0.257493	1.16095	0.582418	0.285704	1.40378e-73
35	ENSDARG00000053583	cers6	ceramide synthase 6	0.423267	0.172097	0.708424	0.406593	0.186158	2.17738e-46
35	ENSDARG00000025106	ppp3cb	protein phosphatase 3, catalytic subunit, beta isozyme	0.419187	0.1428	0.630347	0.340659	0.137979	3.04175e-33
35	ENSDARG00000063307	sgsm2	small G protein signaling modulator 2	0.413528	0.122695	0.455444	0.296703	0.121329	1.06158e-28
35	ENSDARG00000059690	slc29a4	solute carrier family 29 member 4	0.36045	0.130713	0.672212	0.362637	0.15551	5.01431e-38
35	ENSDARG00000002994	itpkca	inositol-trisphosphate 3-kinase Ca	0.355551	0.128936	0.549296	0.362637	0.150053	1.54582e-36
35	ENSDARG00000030614	syt1a	synaptotagmin Ia	0.340759	0.172252	1.35027	0.505495	0.188808	4.12016e-47
35	ENSDARG00000061741	itpr3	inositol 1,4,5-trisphosphate receptor, type 3	0.330347	0.283155	3.1033	0.857143	0.376834	1.56806e-98
35	ENSDARG00000019753	kcnn3	potassium intermediate/small conductance calcium-activated channel, subfamily N, member 3	0.319384	0.140389	0.80675	0.43956	0.138767	1.85446e-33
35	ENSDARG00000116433	LO017877.2		0.316168	0.170244	1.1754	0.538462	0.211075	3.44346e-53
35	ENSDARG00000076404	mctp1a	multiple C2 domains, transmembrane 1a	0.280064	0.169269	2.08958	0.604396	0.232655	4.41072e-59
35	ENSDARG00000076689	gramd1a	GRAM domain containing 1A	0.26951	0.192507	2.18291	0.714286	0.217799	5.0259e-55
35	ENSDARG00000098769	slitrk6	SLIT and NTRK-like family, member 6	0.261632	0.198381	1.92632	0.758242	0.2354	7.85001e-60
35	ENSDARG00000018397	hpca	hippocalcin	0.255906	0.15748	1.76784	0.615385	0.192171	4.97731e-48
35	ENSDARG00000038941	ppp1r1c	protein phosphatase 1, regulatory (inhibitor) subunit 1C	0.234507	0.12885	0.916595	0.549451	0.157946	1.08541e-38
35	ENSDARG00000003835	stom	stomatin	0.229245	0.115882	0.938545	0.505495	0.118625	5.80497e-28
35	ENSDARG00000091006	cobl	cordon-bleu WH2 repeat protein	0.222143	0.178203	2.40485	0.802198	0.221109	6.27218e-56
36	ENSDARG00000059130	gata1b	GATA binding protein 1b	0.860646	0.22592	0.459616	0.2625	0.179787	1.33047e-39
36	ENSDARG00000070578	edn2	endothelin 2	0.848167	0.148429	0.619008	0.175	0.122641	1.29353e-25
36	ENSDARG00000051874	stra6	stimulated by retinoic acid 6	0.821737	0.369781	3.17838	0.45	0.304591	3.56726e-70
36	ENSDARG00000095833	alk	ALK receptor tyrosine kinase	0.780135	0.702121	8.41482	0.9	0.720646	8.7318e-173
36	ENSDARG00000076933	aldh1a3	aldehyde dehydrogenase 1 family, member A3	0.757685	0.644032	10.8143	0.85	0.60166	2.58757e-143
36	ENSDARG00000054055	ostn	osteocrin	0.736281	0.165663	0.379741	0.225	0.144023	7.53831e-31
36	ENSDARG00000052064	si:dkeyp-93a5.2	si:dkeyp-93a5.2	0.715169	0.23243	0.769741	0.325	0.215334	2.64411e-48
36	ENSDARG00000097523	si:ch73-364h19.1	si:ch73-364h19.1	0.593865	0.222699	0.729792	0.375	0.240892	1.45772e-54
36	ENSDARG00000009624	CABZ01027646.1		0.563724	0.472119	5.20275	0.8375	0.50189	1.10757e-118
36	ENSDARG00000003303	stc1	stanniocalcin 1	0.561675	0.203607	2.27258	0.3625	0.185435	5.51508e-41
36	ENSDARG00000089235	tspearb	thrombospondin-type laminin G domain and EAR repeats b	0.522731	0.307104	1.80618	0.5875	0.284539	2.94208e-65
36	ENSDARG00000004433	btk	Bruton agammaglobulinemia tyrosine kinase	0.518042	0.388532	2.71994	0.75	0.470545	5.86355e-111
36	ENSDARG00000074602	mrvi1	murine retrovirus integration site 1 homolog	0.509966	0.22311	0.920296	0.4375	0.228443	1.63136e-51
36	ENSDARG00000052115	ehf	ets homologous factor	0.509324	0.33106	1.6334	0.65	0.332508	5.05252e-77
36	ENSDARG00000077580	tspeara	thrombospondin-type laminin G domain and EAR repeats a	0.507323	0.228295	1.62907	0.45	0.187059	2.20827e-41
36	ENSDARG00000002816	rasgrf2b	Ras protein-specific guanine nucleotide-releasing factor 2b	0.442257	0.359334	2.84612	0.8125	0.433054	9.94154e-102
36	ENSDARG00000058647	hck	HCK proto-oncogene, Src family tyrosine kinase	0.417715	0.240186	1.3623	0.575	0.286989	7.38077e-66
36	ENSDARG00000040466	vil1	villin 1	0.361378	0.203275	1.56003	0.5625	0.262975	5.67278e-60
36	ENSDARG00000033042	ptprja	protein tyrosine phosphatase receptor type Ja	0.335061	0.251296	2.05183	0.75	0.356117	8.09201e-83
36	ENSDARG00000071107	wnt7bb	wingless-type MMTV integration site family, member 7Bb	0.318526	0.171208	1.18401	0.5375	0.156803	5.61332e-34
36	ENSDARG00000008808	eml2	EMAP like 2	0.316203	0.150196	1.00714	0.475	0.182679	2.60646e-40
36	ENSDARG00000058108	eps8l2	EPS8 like 2	0.310946	0.178794	1.41416	0.575	0.214342	4.62594e-48
36	ENSDARG00000029372	rasa4	RAS p21 protein activator 4	0.310617	0.201901	1.31459	0.65	0.223847	2.17734e-50
36	ENSDARG00000060542	lgr4	leucine-rich repeat containing G protein-coupled receptor 4	0.30275	0.185435	1.72787	0.6125	0.204604	1.1203e-45
36	ENSDARG00000098368	aplp1	amyloid beta (A4) precursor-like protein 1	0.257942	0.154765	2.09816	0.6	0.159373	1.31902e-34
36	ENSDARG00000014181	foxp1b	forkhead box P1b	0.251225	0.241804	7.5902	0.9625	0.424217	1.48458e-99
36	ENSDARG00000076622	atp13a3	ATPase 13A3	0.243007	0.154917	2.34915	0.6375	0.149853	2.82015e-32
36	ENSDARG00000054137	adgrg6	adhesion G protein-coupled receptor G6	0.237746	0.160478	1.61644	0.675	0.203161	2.52634e-45
36	ENSDARG00000020395	mical2b	microtubule associated monooxygenase, calponin and LIM domain containing 2b	0.23505	0.15572	2.63615	0.6625	0.197244	7.09524e-44
36	ENSDARG00000069440	dachd	dachshund d	0.227452	0.173432	3.32687	0.7625	0.17772	4.26278e-39
37	ENSDARG00000087870	adgrf3a	adhesion G protein-coupled receptor F3a	0.228608	0.16706	1.54636	0.730769	0.239206	6.56236e-53
37	ENSDARG00000041413	adgrg11	adhesion G protein-coupled receptor G11	0.219407	0.194091	2.45133	0.884615	0.29313	7.65821e-66
37	ENSDARG00000094041	krt17	keratin 17	0.186081	0.157453	4.29898	0.846154	0.09134	1.79879e-17
37	ENSDARG00000099902	il17rc	interleukin 17 receptor C	0.183902	0.127317	1.19657	0.692308	0.131764	3.63992e-27
37	ENSDARG00000006588	zgc:111983	zgc:111983	0.18016	0.166302	5.36762	0.923077	0.116511	1.64841e-23
37	ENSDARG00000111240	dhrs13a.2	dehydrogenase/reductase (SDR family) member 13a, tandem duplicate 2	0.174298	0.116198	2.2612	0.666667	0.0585299	1.39588e-09
37	ENSDARG00000060682	agr1	anterior gradient 1	0.170216	0.113477	1.58174	0.666667	0.06276	1.3351e-10
37	ENSDARG00000017624	krt4	keratin 4	0.168044	0.150808	14.0701	0.897436	0.097315	6.62177e-19
37	ENSDARG00000096662	abcc3	ATP-binding cassette, sub-family C (CFTR/MRP), member 3	0.164118	0.136765	2.2155	0.833333	0.223443	3.93687e-49
37	ENSDARG00000015709	hsd17b12a	hydroxysteroid (17-beta) dehydrogenase 12a	0.158981	0.11414	1.50291	0.717949	0.0671331	1.18185e-11
37	ENSDARG00000031588	si:dkey-239b22.1	si:dkey-239b22.1	0.158894	0.0957439	1.0806	0.602564	0.0472628	7.32773e-07
37	ENSDARG00000052413	crfb12	cytokine receptor family member B12	0.155298	0.105523	1.19491	0.679487	0.0675454	9.40459e-12
37	ENSDARG00000076230	atp10b	ATPase phospholipid transporting 10B	0.155214	0.107456	1.53732	0.692308	0.0656046	2.7575e-11
37	ENSDARG00000103459	evplb	envoplakin b	0.153949	0.0967114	0.977317	0.628205	0.0570206	3.22679e-09
37	ENSDARG00000007080	rhcgl1	Rh family, C glycoprotein, like 1	0.153124	0.106009	1.52342	0.692308	0.058843	1.1732e-09
37	ENSDARG00000004748	zgc:100868	zgc:100868	0.153033	0.0961362	1.22406	0.628205	0.054409	1.37648e-08
37	ENSDARG00000103199	si:dkey-247k7.2	si:dkey-247k7.2	0.151001	0.114218	3.0024	0.75641	0.0668587	1.37601e-11
37	ENSDARG00000041433	si:dkey-7c18.24	si:dkey-7c18.24	0.150423	0.131138	6.18746	0.871795	0.0857302	3.99835e-16
37	ENSDARG00000042055	fam129aa		0.1502	0.123241	1.73549	0.820513	0.0829101	1.90211e-15
37	ENSDARG00000068760	tnks1bp1	tankyrase 1 binding protein 1	0.149833	0.117177	1.86984	0.782051	0.129927	1.00297e-26
37	ENSDARG00000046090	dhrs11a	dehydrogenase/reductase (SDR family) member 11a	0.147373	0.09447	1.17393	0.641026	0.0621556	1.86686e-10
37	ENSDARG00000056836	si:ch211-125o16.4	si:ch211-125o16.4	0.145317	0.132276	6.24799	0.910256	0.0911785	1.96672e-17
37	ENSDARG00000036588	mhc1zba	major histocompatibility complex class I ZBA	0.143618	0.0994277	1.9327	0.692308	0.052142	4.85264e-08
37	ENSDARG00000103917	znf185	zinc finger protein 185 with LIM domain	0.140636	0.128015	4.52969	0.910256	0.0941678	3.76906e-18
37	ENSDARG00000019808	evpla	envoplakin a	0.136204	0.130965	5.60473	0.961538	0.105213	8.43654e-21
[truncated: 177 more rows]
